# Supplementary material for: Transcriptome analysis of pod mutant reveals plant hormones are important regulators in controlling pod size in peanut (Arachis hypogaea L.)
Source: PeerJ. 2022 Feb 28;10:e12965. doi: 10.7717/peerj.12965 (PMC8893032; doi:10.7717/peerj.12965)
Supplement: Data S1 [file peerj-10-12965-s008.xlsx]

## Sheet: Sheet1
Raw data 1 The raw data of natutal matured pods
Samples	Pod dry length (mm)		Pod dry width (mm)		Seed dry length (mm)		Seed dry width (mm)		Pod dry weight (g)		Seed dry weight (g)		Shell dry weight (g)
	WT	spm	WT	spm	WT	spm	WT	spm	WT	spm	WT	spm	WT	spm
1	29.85	21.41	14.88	11.28	13.52	8.64	9.64	7.19	2.24	0.46	0.83	0.22	0.37	0.17
2	28.89	20.64	14.76	10.23	13.05	10.72	10.8	7.12	1.74	0.7	0.9	0.28	0.35	0.15
3	28.34	19.27	15.3	10.27	14.39	9.37	9.77	7.52	2.17	0.29	0.79	0.3	0.33	0.12
4	31.37	19.99	16.45	10.25	14.49	11.11	10.22	8.09	1.75	0.44	0.81	0.22	0.35	0.13
5	24.38	16.45	14.49	10.38	14.03	9.43	9.82	7.68	2.32	0.52	0.73	0.21	0.36	0.12
6	27.1	21.16	13.17	10.72	15.06	10.67	9.98	7.12	1.85	0.54	0.66	0.21	0.38	0.14
7	25.54	19.56	13.7	11.19	13.67	10.64	9.37	8.86	1.58	0.51	0.76	0.22	0.39	0.18
8	31.01	19.78	15.46	9.9	13.96	9.12	10.48	8.27	2.26	0.6	0.78	0.25	0.32	0.12
9	26.3	19.61	14.71	10.71	13.78	11.93	9.72	8.32	1.88	0.57	0.82	0.2	0.34	0.15
10	24.85	19.39	14.82	9.59	15.47	11.54	9.7	7.43	1.67	0.59	0.7	0.23	0.32	0.1
11	27.7	23.24	14.05	10.57	15.48	10.79	9.75	7.11	1.78	0.62	0.78	0.2	0.33	0.25
12	28.93	22.69	14.91	11.56	13.56	10.42	10.55	8.41	2.21	0.83	0.86	0.26	0.39	0.13
13	31.45	18.33	14.22	11.18	13.09	8.49	9.86	7.82	1.76	0.56	0.74	0.22	0.31	0.14
14	26.93	20.86	13.76	11.49	15.17	8.86	10.42	7.71	2.12	0.67	0.89	0.19	0.36	0.11
15	29.21	18.56	14.37	11.32	15.19	11.86	10.18	6.96	2.1	0.54	0.77	0.25	0.38	0.19
Average	28.1233	20.0627	14.6033	10.7093	14.2607	10.2393	10.0173	7.70733	1.962	0.562667	0.788	0.230667	0.352	0.146667
Raw data 2 The pod size were meatured at three stages
Samples	WT									spm
	Pod length (mm)			Pod width (mm)			Pod weight (g)			Pod length (mm)			Pod width (mm)			Pod weight (g)
	stage S1	stage S2	stage S3	stage S1	stage S2	stage S3	stage S1	stage S2	stage S3	stage S1	stage S2	stage S3	stage S1	stage S2	stage S3	stage S1	stage S2	stage S3
1	11.5	23.47	28.1	6.85	13.34	13.3	0.26	2.34	3.15	10.02	20.18	21.4	4.9	11.2	11.35	0.13	1.18	1.44
2	12.39	23.45	27.18	6.16	12.78	13.49	0.24	2.2	2.76	9.11	19.14	23.68	5.24	10.55	12.24	0.14	1.21	1.37
3	11.78	21.81	29.49	7.51	12.13	14.53	0.22	2	2.96	10.01	21.18	22.56	4.25	9.98	10.99	0.16	0.97	1.25
4	11.28	22.63	29.8	7.29	12.92	13.87	0.23	1.98	3.3	9.68	20.3	23.02	4.11	10.32	10.8	0.21	0.87	1.13
5	12.42	20.45	30.5	6.72	13.27	12.48	0.24	1.91	2.97	10.23	21.31	22.35	4.34	11.31	12.22	0.15	1.2	0.92
6	11.39	22.22	27.62	6.91	12.33	13.56	0.25	2.25	3.32	9.1	20.06	4.02	4.47	10.46	11.99	0.14	0.68	1.12
7	11.52	23.57	28.5	7.51	12.8	13.87	0.26	2.27	2.87	9.8	22.3	23.57	5.22	11.42	12.02	0.17	0.88	0.86
8	12.17	22.77	29.86	6.17	12.14	12.96	0.27	2	2.98	9.68	20.18	19.75	4.54	10.37	10.15	0.17	1.28	1.44
9	11.05	22.63	27.63	6.61	12.15	13.96	0.25	1.89	2.77	10.12	21.49	21.34	4.68	10.07	9.03	0.16	0.97	1.12
10	12.4	20.58	28.63	6.96	11.93	13.07	0.23	2.15	3.1	9.27	21.07	22.57	5.22	11.18	10.91	0.13	0.74	1.34
11	12.02	23.78	28.53	8.52	12.67	15.42	0.23	2.16	3.03	10.21	18.37	21.74	5.96	10.23	11.63	0.17	0.83	1.34
12	11.7	22.35	29.4	8.14	11.86	14.53	0.25	2.17	3.17	9.3	17.8	20.61	6.74	9.92	10.36	0.22	0.75	1.11
13	11.89	23.42	27.16	7.5	11.33	14.43	0.28	2.31	3.18	9.49	18.57	23.05	6.54	9.2	11.09	0.15	0.72	1.1
14	10.6	23.71	26.63	9.34	12.53	15.07	0.25	2.38	2.82	9.31	18.79	19.74	5.76	11.48	10.38	0.17	0.86	1.34
15	11.59	22.54	27.4	7.81	11.43	15.75	0.26	2.58	3.02	10.43	17.79	20.89	6.99	10.81	11.63	0.14	0.82	1.13
16	10.9	23.44	27.55	7.35	10.87	16.09	0.3	2.31	2.7	10.3	18.98	22.87	6.54	10.03	11.26	0.17	0.74	1.36
17	12.04	24.16	28.59	8.52	11.99	15.19	0.26	2.53	3.34	9.31	18.98	20.73	5.87	10.37	10.08	0.16	0.72	1
18	11.48	23.12	27.54	8.71	11.56	15.53	0.24	2.29	3.25	7.40647	18.59	20.42	6.95	10.71	10.96	0.21	0.83	1.09
19	11.15	22.35	27.29	8.58	12.44	16.31	0.25	2.16	2.91	10.32	17.46	22.07	6.43	10.48	11.63	0.18	0.75	1.33
20	10.45	23.56	28.4	8.03	11.86	16.74	0.25	2.14	3.16	10.3	19.15	20.94	5.96	10.14	10.09	0.15	0.94	1.43
21	11.51	23.53	27.84	5.93	12.82	14.31	0.24	2.24	3.16	7.55	22.19	18.86	7.15	11.03	11.11	0.16	1.04	1.41
22	12.07	23.85	27.53	5.51	11.94	14.75	0.28	2.27	3.17	7.09	17.25	17.63	6.8	10.31	12.25	0.15	1.03	1.32
23	12.28	24.74	26.63	6.18	11.85	14.6	0.25	2.08	2.93	9.1	18.68	18.87	7.14	10.01	11.24	0.17	1.37	1.09
24	11.84	23.73	27.46	5.71	11.7	14.08	0.41	1.98	2.7	7.66	19.37	18.64	6.58	9.82	11.37	0.16	1.02	1.06
25	12.06	24.19	29.63	6.06	12.82	14.54	0.27	2.43	3.27	9.31	20.14	17.71	7.16	11.36	11.1	0.14	1.5	1.32
26	11.93	24.63	26.42	5.85	12.58	15.32	0.25	2.21	3.16	8.21	19.17	19.52	6.67	10.11	10.81	0.17	1.27	1.2
27	11.26	23.52	26.74	6.19	11.57	13.49	0.23	2.08	2.91	8.99	17.37	20.85	6.03	11.34	10.91	0.18	1.37	1.22
28	12.28	22.73	28.74	5.84	12.26	13.44	0.29	1.87	3.15	8.37	17.89	19.87	6.66	10.92	11.36	0.14	1.15	1.19
29	12.05	23.51	29.74	5.3	12.85	14.32	0.24	2.49	3.04	7.31	18.15	17.9	7.31	10.89	10.81	0.18	1.26	1.2
30	11.26	22.63	29.84	5.61	11.47	13.32	0.23	2.39	2.93	7.66	19.25	17.63	7.58	10.73	11.45	0.16	1.02	1.1
Raw data 3 The pod cell size at three stages
		WT							spm
Samples1	Repeat	exocarp (μm2)			mesocarp (μm2)		endocarp (μm2)		exocarp (μm2)			mesocarp (μm2)		endocarp (μm2)
		stage S1	stage S2	stage S3	stage S1	stage S2	stage S1	stage S2	stage S1	stage S2	stage S3	stage S1	stage S2	stage S1	stage S2
sample1	1	234.454	638.183	639.488	773.587	1332.32	2035.18	8666.36	342.563	523.175	567.75	586.838	1301.97	1084.55	4980.65
	2	272.254	744.983	647.688	674.987	1571.52	2093.08	9306.66	345.163	435.275	575.25	671.838	1344.47	1071.85	5688.25
	3	298.454	604.883	739.788	640.387	1603.82	2318.78	10575.6	243.863	562.875	628.55	493.838	1474.67	1293.05	4624.35
	4	300.554	615.783	559.188	630.287	1533.62	2467.78	11942.1	284.863	561.775	656.15	696.438	1132.38	1260.15	5354.25
	5	318.754	628.683	534.488	631.987	1359.12	1700.48	9363.66	238.163	472.475	675.65	455.638	1227.88	1317.25	4849.55
	6	343.954	559.783	725.188	599.688	1496.32	2317.78	10005.4	263.263	480.575	617.85	556.438	1440.28	1419.05	4823.25
sample2	1	244.6	565.5	709	597.9	1507.7	2031.7	13491.3	194.2	534.8	526	581.4	1366.6	1857.9	5162.3
	2	313.4	502.8	593.3	872.1	1126.8	2255	12492.4	221.8	480	868.6	703.1	1504.8	1314.5	4010.1
	3	351.6	737.3	560.5	841.7	1692.8	2462.5	10351.7	226.7	617.5	704.1	565.2	1465.9	2018	4965.6
	4	341.5	580.7	774.6	1087.8	1538.5	2523	15213.2	221.6	544	516.7	734.1	1199.5	1362	5153.2
	5	265.1	626.2	910.4	997.3	1788.9	2724.2	17836.8	222.1	635.2	692.8	548	1114.3	1447.6	6432.7
	6	249.7	745	686.2	1065.1	1977.3	3060.8	11103.7	204.5	623.1	611.8	794.6	1199.1	1531.8	5934.2
sample2	1	269.7	692.2	690.3	979.1	1550.3	2009.9	13181.7	227.5	521.5	487.6	663.5	1319.7	2092.2	4365.6
	2	274.5	526	700.5	875.5	2301.9	2084.9	11835.8	234.9	580	500.3	609.9	1133.7	1549	5783.2
	3	250.6	712.1	770.3	778.3	1548.8	2048.1	14748.9	179.4	651.9	550.2	806.9	1059.2	1365.6	4478.4
	4	296.7	632.9	1107.8	719.6	1452.2	2265.9	17780.2	351.5	548.4	707.3	498.2	1213.8	1539	4774.7
	5	280.1	603.5	623.8	719	1244.9	2536.8	13982	209.4	589.9	723.8	615.7	1446.5	2647	6157.1
	6	277.2	590	1003.2	794.4	1221.4	2002.4	13542.7	196.7	562.3	573.9	727	1364.6	2040	4859.7
Raw data 4 The contents of plant hormones
	Auxin (nmol/g)	GA (pmol/g)	(pmol/g)
WTS1-1	118.759	849.073	717.003
WTS1-2	107.574	915.805	792.011
WTS1-3	114.108	877.763	676.939
spmS1-1	65.453	636.747	385.217
spmS1-2	91.4187	692.735	557.996
spmS1-3	75.5832	688.059	601.589
WTS2-1	121.263	1044.59	731.572
WTS2-2	115.351	903.672	715.182
WTS2-3	118.74	1000.61	758.092
spmS2-1	78.5206	541.453	503.362
spmS2-2	99.8919	770.588	449.867
spmS2-3	98.3103	758.203	640.744
WTS3-1	138.831	1028.41	820.808
WTS3-2	150.599	1194.1	776.418
WTS3-3	128.569	1153.16	1034.11
spmS3-1	62.7415	673.525	627.54
spmS3-2	71.6102	871.064	667.833
spmS3-3	90.2136	827.209	591.915
Raw data 5 qRT-PCR verification of DEGs between WT and spm pods
Gene	Stages	RNA-seq		Standard Error		RT-PCR		Standard Error
		WT	spm	WT (SE)	spm(SE)	WT	spm	WT (SE)	spm(SE)
BEH2 (arahy.7MK8W0)	S1	5.20739	5.16643	0.164987	0.0710196	1.04736	1.0003	0.00719388	0.017518
	S2	4.99367	6.12928	0.231272	0.196393	1.00187	1.05706	0.0427891	0.0363524
	S3	4.67486	5.57177	0.185544	0.0632619	0.744246	1.00031	0.11239	0.0175934
GA2OX1 (arahy.V5BWWI)	S1	2.19629	0.451013	0.208991	0.163715	1.22514	1.00205	0.0374923	0.0446218
	S2	4.07895	0.719841	0.787044	0.341482	1.21696	1.00134	0.0230242	0.0370049
	S3	4.28296	2.08984	0.487818	0.416868	1.0021	0.0932997	0.0458277	0.00744825
DRM1 (arahy.Q5B35H)	S1	9.62429	10.247	0.150418	0.251935	1.00299	1.07612	0.0554179	0.0532486
	S2	9.94711	12.3623	0.0427656	0.316181	0.477969	1.00224	0.0454973	0.0477353
	S3	10.8537	11.9899	0.095289	0.225941	1.00014	1.00067	0.049549	0.0261219
GID1B (arahy.J64Z1K)	S1	1.55434	2.20696	0.146493	0.228198	1.00444	1.27184	0.0668463	0.0422105
	S2	2.2163	5.42549	0.115919	0.409774	0.947325	1.00067	0.0471752	0.0262017
	S3	3.1177	4.80875	0.153782	0.37877	1.00226	1.59983	0.047557	0.0681852
BSK3 (arahy.X0DYQH)	S1	3.35713	3.46245	0.0893927	0.170125	0.669513	1.0074	0.0397609	0.0840868
	S2	2.72748	1.10434	0.303712	0.202823	1.34431	1.00348	0.0712906	0.0582068
	S3	1.48388	1.3505	0.122719	0.0214862	1.00039	0.385421	0.0197539	0.009879
PILS2 (arahy.SXH82X)	S1	3.64236	4.45727	0.0463611	0.374992	1.00549	5.30537	0.0746188	0.170652
	S2	5.8201	7.39258	0.390511	0.117227	0.460785	1.00534	0.0366871	0.0714834
	S3	6.83441	7.12887	0.135064	0.196156	1.00956	1.22578	0.0995139	0.0554825
BZR1 (arahy.A43ZUL)	S1	3.25656	3.21925	0.0132921	0.0858711	1.00166	0.794953	0.0410482	0.0227082
	S2	3.08576	1.94598	0.154226	0.145778	1.43898	1.00047	0.0469789	0.0218014
	S3	2.61753	2.36177	0.035004	0.0768499	1.00017	0.502342	0.0129031	0.0498171
ABCB1 (arahy.P2ZBX8)	S1	3.98459	3.8339	0.138951	0.168092	1.00067	0.573483	0.0257793	0.0126055
	S2	3.47379	1.16543	0.198763	0.326798	2.17814	1.00269	0.0873904	0.0513806
	S3	3.13307	1.71061	0.168525	0.184701	1.00088	0.203548	0.0299048	0.0237686
AUX22B (arahy.VW0TTK)	S1	4.52375	4.35283	0.0589554	0.0945943	1.00078	0.547191	0.0279308	0.01
	S2	4.02503	1.97343	0.21434	0.138358	1.00068	0.729647	0.0263216	0.0250926
	S3	3.60443	2.06936	0.130752	0.0380489	1.00513	0.381019	0.071342	0.0575383
