# Supplementary material for: Transcriptome analysis of pod mutant reveals plant hormones are important regulators in controlling pod size in peanut (Arachis hypogaea L.)
Source: PeerJ. 2022 Feb 28;10:e12965. doi: 10.7717/peerj.12965 (PMC8893032; doi:10.7717/peerj.12965)
Supplement: Supplemental Information 1 — Pairwise comparison at each developmental stage was performed to investigate the transcriptional differences and a total of 10,396 DEGs (|FC| ≥ 2 and FDR < 0.05) were detected in spm pods compared with WT pods. [file peerj-10-12965-s009.xlsx]

## Sheet: DEGs at stage S1
The differentially expressed genes between WT and spm at three stages
*: FC = fold change. The FC≥ 2 , that is, |log2FC| ≥ 1 is considered as significantly differential expression
**: FDR = false discovery rate. Adjusted for multiple tests. FDR < 0.05 is considered to be statistically significant
Gene ID	*log2FC (spmS1/WTS1)	P-value	**FDR
arahy.G8LUQ6	-16.6402	6.50688e-26	4.70778e-23
arahy.90Y0GX	-16.3195	1.71552e-31	1.78611e-28
arahy.1ZHN64	-16.0295	2.26032e-29	2.19287e-26
arahy.5QJ4TD	-15.7986	4.53354e-27	3.79457e-24
arahy.PSG53D	-15.6034	6.20736e-24	3.58072e-21
arahy.55FLCK	-15.5014	5.45063e-24	3.23154e-21
MSTRG.16972	-15.3956	7.41799e-21	2.87865e-18
arahy.Z621FR	-15.2648	3.66224e-27	3.1266e-24
arahy.8U9H8D	-15.0296	6.65191e-22	2.86818e-19
arahy.IT7G4I	-14.8662	1.98401e-22	9.41014e-20
arahy.391TM2	-14.7609	1.23246e-23	6.83249e-21
arahy.R3ZIXT	-14.7038	3.08433e-21	1.25391e-18
arahy.NG9QQJ	-14.6046	1.09352e-22	5.62398e-20
arahy.D2JYDS	-14.4574	7.7304e-26	5.49979e-23
arahy.0W4FI5	-14.4237	7.95639e-22	3.39634e-19
MSTRG.17125	-14.4131	2.73856e-17	7.3063e-15
arahy.VUP14P	-14.3387	4.67401e-24	2.81013e-21
arahy.7804KT	-14.2453	1.2102e-24	7.7104e-22
arahy.EHU7FT	-14.2241	2.10714e-22	9.77732e-20
arahy.JM79CB	-14.199	6.13422e-24	3.58072e-21
arahy.YP8DRN	-14.1672	3.50498e-25	2.37488e-22
arahy.66HKGP	-14.1161	1.94648e-22	9.3359e-20
MSTRG.41716	-14.0504	1.54786e-20	5.64731e-18
arahy.Y0EE8X	-14.0316	4.01608e-20	1.44063e-17
arahy.L75U5K	-14.0304	1.33226e-20	4.94525e-18
arahy.IH4GAK	-14.0215	1.13897e-20	4.26483e-18
arahy.GST58F	-14.0145	2.28476e-22	1.03755e-19
arahy.NFFY6G	-13.9379	2.24389e-22	1.02995e-19
arahy.G9B5FS	-13.8214	3.06276e-15	6.40881e-13
arahy.6AD899	-13.7246	3.3753e-23	1.77878e-20
arahy.D0Q561	-13.6573	2.99849e-20	1.08472e-17
arahy.VA7IIE	-13.6333	6.0406e-14	1.06994e-11
MSTRG.17178	-13.6181	6.52869e-17	1.6688e-14
arahy.LEZM1J	-13.6054	9.46798e-13	1.40333e-10
arahy.501GHP	-13.5346	4.74335e-11	5.47242e-09
MSTRG.4285	-13.4564	2.8416e-14	5.22842e-12
MSTRG.41334	-13.4551	0.000203412	0.00586327
arahy.NQ5KT7	-13.4173	3.21358e-16	7.70663e-14
arahy.UQJP0C	-13.3681	5.88674e-17	1.52439e-14
arahy.U5T9YL	-13.3663	1.89157e-22	9.17563e-20
arahy.Y5ZCTQ	-13.3494	1.04489e-20	3.9472e-18
arahy.FWH2UP	-13.3471	1.52476e-15	3.28724e-13
arahy.NA36AX	-13.279	8.95308e-15	1.75312e-12
arahy.WU2DYS	-13.2527	5.8923e-17	1.52439e-14
arahy.CQR159	-13.2238	1.26089e-17	3.63111e-15
arahy.ZYX0UD	-13.2071	1.79391e-16	4.40095e-14
arahy.7Z40J1	-13.1789	1.09153e-22	5.62398e-20
arahy.S9C4R7	-13.14	7.59023e-15	1.52115e-12
arahy.G51JN1	-13.1239	1.39108e-20	5.11906e-18
arahy.BX0HUJ	-13.0973	9.88319e-14	1.67414e-11
arahy.MYP9FH	-13.0818	5.99535e-18	1.77725e-15
arahy.3CPC1Y	-13.0735	1.46082e-10	1.54735e-08
arahy.7PY5NM	-13.0712	3.36108e-18	1.02482e-15
arahy.W4A4ZK	-13.0189	8.63381e-18	2.52433e-15
arahy.W9SEAP	-12.992	8.3266e-11	9.06728e-09
arahy.897SEY	-12.961	4.73248e-22	2.10433e-19
MSTRG.17183	-12.928	8.30109e-15	1.63294e-12
arahy.M33Y2K	-12.9081	5.11412e-16	1.16741e-13
arahy.4XHC1Q	-12.8994	4.44186e-16	1.03612e-13
MSTRG.16926	-12.8784	1.31621e-12	1.92415e-10
arahy.IVJ6DK	-12.8604	3.27647e-18	1.00621e-15
arahy.0B7PBW	-12.8507	6.0978e-17	1.56805e-14
arahy.TS21P9	-12.831	1.79637e-15	3.85335e-13
arahy.5WR99K	-12.7956	3.23982e-16	7.72616e-14
arahy.5T510H	-12.7827	1.91287e-16	4.63948e-14
arahy.SS1ETW	-12.7779	3.82934e-15	7.89676e-13
arahy.FN6QZN	-12.7628	1.44239e-16	3.57974e-14
arahy.V07PF1	-12.7475	1.11186e-19	3.89032e-17
arahy.K57DW9	-12.7426	2.08691e-17	5.67412e-15
arahy.IRD816	-12.7214	1.80661e-17	5.04043e-15
arahy.A0EQPQ	-12.7142	1.28885e-15	2.82138e-13
arahy.VNIF6J	-12.6424	4.43624e-19	1.44557e-16
arahy.8JC9PH	-12.6401	1.57168e-18	4.96965e-16
arahy.286I7U	-12.6341	5.10224e-12	6.74301e-10
arahy.PQ7T65	-12.6325	1.54401e-17	4.39395e-15
MSTRG.17088	-12.5996	3.74633e-11	4.47177e-09
arahy.J42BJ7	-12.5957	1.77079e-14	3.34469e-12
arahy.9QS057	-12.5793	2.51483e-14	4.68779e-12
arahy.YRI3HS	-12.4843	4.68156e-11	5.41576e-09
arahy.IA3QS0	-12.4589	9.48197e-15	1.84821e-12
arahy.A2XG10	-12.3979	7.50338e-16	1.69469e-13
arahy.H7AW2T	-12.3434	1.22816e-13	2.03994e-11
arahy.L964KV	-12.3397	4.19772e-17	1.1061e-14
arahy.4WGD60	-12.303	4.42077e-14	7.96242e-12
arahy.0FQ4XJ	-12.2829	4.11998e-13	6.48965e-11
arahy.XAZ3P8	-12.281	3.03982e-13	4.84183e-11
arahy.D1PG31	-12.2644	3.86271e-11	4.58021e-09
arahy.CPN596	-12.2428	9.0133e-10	8.36415e-08
arahy.8AM4UR	-12.2167	7.74345e-14	1.34368e-11
arahy.4I97V1	-12.1685	3.08235e-14	5.62293e-12
arahy.U4LTZI	-12.1495	7.73305e-15	1.53455e-12
arahy.P86FK6	-12.1293	9.00998e-12	1.17259e-09
arahy.SPP5W5	-12.0901	1.26745e-17	3.63111e-15
arahy.63YJK9	-12.0388	5.65022e-25	3.76861e-22
arahy.29VQUK	-12.0327	2.22043e-13	3.61769e-11
arahy.7J6N7U	-12.0304	8.99338e-17	2.25824e-14
arahy.3IU0NQ	-12.0293	2.263e-09	1.95168e-07
arahy.P33UNN	-12.027	8.82856e-13	1.31312e-10
arahy.C4UQ0G	-12.0215	3.74174e-47	7.60589e-44
arahy.1784RG	-11.992	1.94315e-15	4.14736e-13
arahy.QU8WMY	-11.9586	6.56437e-10	6.187e-08
MSTRG.17240	-11.933	5.0922e-11	5.78114e-09
arahy.20CGAG	-11.9094	1.23616e-15	2.72e-13
arahy.ICGL65	-11.8981	1.03893e-15	2.32194e-13
arahy.MX1HG7	-11.8918	3.02381e-14	5.5398e-12
arahy.H9G0X7	-11.8829	1.31281e-14	2.54727e-12
arahy.LLG5IK	-11.8493	5.95087e-25	3.90807e-22
arahy.WM4DMJ	-11.848	5.70836e-22	2.51209e-19
arahy.6154V7	-11.8204	2.6482e-07	1.63594e-05
arahy.6DHK77	-11.7157	3.0353e-13	4.84183e-11
arahy.50YYNM	-11.6603	4.13594e-10	4.02166e-08
arahy.1X7ZBM	-11.6543	4.6037e-13	7.19847e-11
arahy.ADUU08	-11.6348	9.66593e-13	1.42772e-10
arahy.8ZA7SM	-11.618	1.86879e-23	1.00978e-20
MSTRG.30127	-11.6042	5.50536e-09	4.45233e-07
arahy.H2AKHM	-11.5872	1.51451e-13	2.48654e-11
MSTRG.17110	-11.5603	4.87503e-09	3.99667e-07
arahy.QD1C5V	-11.5134	3.97078e-11	4.66945e-09
arahy.GX31L7	-11.5085	2.2035e-09	1.90793e-07
arahy.FLE44X	-11.5051	4.54423e-13	7.1316e-11
arahy.W8BZZJ	-11.4287	9.17019e-14	1.56579e-11
arahy.A8NRAZ	-11.3645	1.14684e-10	1.23003e-08
arahy.VUY3N3	-11.363	2.10723e-22	9.77732e-20
arahy.Q66BD2	-11.335	2.71523e-10	2.72077e-08
arahy.YL00Q2	-11.3238	1.04722e-13	1.75304e-11
arahy.QCX1RW	-11.2781	6.10533e-11	6.84037e-09
arahy.UPL2TI	-11.2753	1.17705e-21	4.97471e-19
arahy.NQRV4U	-11.1485	1.70781e-12	2.39807e-10
arahy.T07MCP	-11.1314	2.00936e-09	1.75765e-07
arahy.J4CCY6	-11.1142	3.13837e-09	2.64236e-07
arahy.ZUU225	-11.1098	8.84479e-08	6.01207e-06
arahy.2L7SHU	-11.1077	2.49611e-09	2.12254e-07
arahy.H1GLBW	-11.0989	1.26406e-07	8.32699e-06
arahy.YJWL0V	-11.0967	2.48023e-12	3.38254e-10
arahy.DHKF98	-11.0566	1.07451e-11	1.38155e-09
arahy.12HWWY	-11.0362	1.89853e-09	1.66754e-07
arahy.050HUA	-10.9727	2.11503e-21	8.76548e-19
MSTRG.16721	-10.9464	1.7142e-07	1.09379e-05
arahy.75Q1P4	-10.9415	3.96937e-13	6.27557e-11
arahy.8R729R	-10.9391	9.64083e-14	1.63959e-11
MSTRG.45370	-10.9317	2.62877e-07	1.62629e-05
arahy.JYUV9M	-10.9169	5.75573e-11	6.48271e-09
arahy.I18LAP	-10.9094	2.11113e-10	2.16629e-08
arahy.RD60QW	-10.8943	5.86466e-14	1.0431e-11
MSTRG.42919	-10.8111	0.00231584	0.0400714
arahy.SUKE0C	-10.8103	1.53553e-27	1.3377e-24
MSTRG.49496	-10.8004	0.000113086	0.00361326
arahy.4ZN8UM	-10.7566	6.31566e-11	7.05751e-09
arahy.M7PLWR	-10.7171	8.58676e-11	9.32679e-09
arahy.EZRH7V	-10.7142	2.35266e-07	1.46825e-05
arahy.YU9W9A	-10.6941	9.43524e-07	5.27176e-05
arahy.I64K46	-10.6707	2.14845e-08	1.61179e-06
arahy.E2W35F	-10.6588	1.66468e-08	1.25993e-06
arahy.W6P66N	-10.6442	2.56987e-19	8.57032e-17
arahy.QU8W8M	-10.6104	8.31338e-11	9.06728e-09
arahy.1DU7LF	-10.5981	4.41855e-11	5.12786e-09
MSTRG.18131	-10.5887	0.00198834	0.0354982
arahy.P3QKDQ	-10.5635	1.21174e-09	1.10289e-07
arahy.9S9EKZ	-10.5475	1.38506e-13	2.28279e-11
MSTRG.17235	-10.5379	5.95375e-05	0.00209036
arahy.27HQCZ	-10.5281	0.000346046	0.00915221
arahy.N8QUMN	-10.4615	3.52543e-06	0.000175601
MSTRG.17152	-10.4374	6.48569e-07	3.71119e-05
arahy.C2E8GX	-10.3851	1.02747e-17	2.98365e-15
arahy.EV65WI	-10.37	1.17817e-07	7.8094e-06
arahy.D79Q71	-10.3517	1.18471e-10	1.26429e-08
arahy.733TCI	-10.3337	1.39249e-18	4.43592e-16
arahy.V55W7Y	-10.3163	1.71836e-19	5.82156e-17
arahy.D859PH	-10.2566	4.62221e-09	3.8017e-07
arahy.KUDP7J	-10.2368	8.88518e-17	2.24427e-14
MSTRG.35078	-10.1421	0.000294661	0.00804747
arahy.Q9F21C	-10.1081	4.32725e-22	1.94439e-19
arahy.5HMM9E	-10.0895	3.01067e-23	1.60645e-20
arahy.ZR5QI2	-10.0573	4.89696e-18	1.47209e-15
arahy.U3WWWH	-10.0453	2.83735e-07	1.73522e-05
MSTRG.17130	-10.0131	6.73006e-11	7.48141e-09
arahy.E5BVVA	-9.96097	2.70764e-09	2.29328e-07
arahy.WTC06L	-9.96097	1.94458e-07	1.22975e-05
arahy.RE1YA1	-9.90187	5.77232e-05	0.00203976
arahy.4IXQ36	-9.82443	0.00124063	0.0250042
arahy.G24WC3	-9.81378	3.84882e-10	3.7596e-08
arahy.2NZ4WG	-9.80305	1.58443e-11	2.00102e-09
arahy.SC2RCC	-9.75377	1.88819e-07	1.19733e-05
arahy.PYV8LV	-9.69597	3.26253e-21	1.31384e-18
MSTRG.43433	-9.64386	0.00108749	0.022577
arahy.XW2FM5	-9.63844	6.59622e-15	1.32817e-12
arahy.XMBW0J	-9.58496	2.52794e-16	6.09662e-14
arahy.9PNN5C	-9.58246	0.000511585	0.012529
arahy.5YG8M2	-9.54432	2.59607e-06	0.000133195
arahy.6835ZM	-9.51175	1.55948e-08	1.19087e-06
arahy.V2AJHY	-9.49785	1.84201e-29	1.8286e-26
arahy.NXES65	-9.43741	0.000934731	0.0201713
arahy.W6K2BP	-9.43045	3.62612e-06	0.000179986
arahy.HE6EBR	-9.42277	3.298e-15	6.83406e-13
arahy.QJLN12	-9.40484	3.88051e-11	4.58857e-09
arahy.VFC9DI	-9.35755	7.6004e-14	1.32424e-11
arahy.F7HX5D	-9.32908	9.58781e-37	1.13688e-33
arahy.F5PR0Y	-9.29634	6.69798e-17	1.70188e-14
arahy.FR9H69	-9.28829	1.01169e-13	1.70024e-11
arahy.RA2IS4	-9.22882	1.50032e-19	5.12353e-17
arahy.86KBF0	-9.1964	1.45287e-09	1.30565e-07
arahy.774XMB	-9.18747	2.00183e-35	2.24874e-32
arahy.YYC1CT	-9.09935	2.65717e-13	4.29647e-11
arahy.T192ZT	-9.08414	1.75894e-16	4.34011e-14
arahy.DIB8K4	-9.04644	2.67889e-14	4.9719e-12
arahy.CW2GVZ	-9.04075	2.00802e-05	0.000805605
MSTRG.36374	-8.99435	0.000532517	0.0129157
arahy.UP6K98	-8.98489	6.09958e-05	0.00212376
arahy.YGS75T	-8.97633	1.21005e-13	2.0177e-11
arahy.8WX4TX	-8.92815	2.80243e-48	5.98138e-45
arahy.X8RB79	-8.79246	1.57611e-12	2.22044e-10
arahy.K7D9EI	-8.79225	0.000599116	0.0141608
arahy.08CHYH	-8.76951	5.21697e-14	9.31786e-12
arahy.NWGY5G	-8.74819	5.85492e-06	0.000270194
arahy.UX4ERZ	-8.71536	1.42482e-39	2.02738e-36
arahy.6PK8GH	-8.69349	4.61944e-12	6.18151e-10
arahy.E0NQML	-8.63057	4.64251e-12	6.19296e-10
arahy.814H4H	-8.59495	0.000400058	0.0103061
arahy.29JE2Z	-8.56986	5.11604e-05	0.00184606
arahy.TT5BBF	-8.56986	0.00106885	0.0223645
arahy.R4EZU5	-8.45121	0.000120001	0.00378321
arahy.LCNF64	-8.43701	3.78167e-16	8.91869e-14
arahy.M8TE87	-8.42347	0.0027871	0.0456885
arahy.85NLUF	-8.27612	3.69788e-05	0.00139199
MSTRG.47838	-8.27612	7.19945e-05	0.00246327
arahy.T958MW	-8.1964	0.00172536	0.0319387
arahy.CFM630	-8.12928	0.00134537	0.0266106
arahy.C5XSWP	-8.04075	0.00031486	0.00851199
arahy.AAFE4G	-8.00843	6.97559e-14	1.22538e-11
arahy.A1CNSV	-8.00375	0.00218601	0.0383221
arahy.99J26D	-7.95544	8.48678e-21	3.26374e-18
arahy.XYSL2Y	-7.91175	5.49359e-218	1.17252e-213
arahy.46R0UG	-7.89222	1.66587e-10	1.74673e-08
arahy.W7YV9U	-7.88671	0.00161131	0.0304211
arahy.3VK2QG	-7.86625	0.000128344	0.00401071
arahy.VRQ703	-7.84549	0.00098743	0.0210226
arahy.XI9RPA	-7.8095	1.33014e-09	1.20808e-07
arahy.W26F3T	-7.53041	3.6583e-29	3.47026e-26
arahy.Q6Q4B7	-7.50779	3.01527e-13	4.83882e-11
arahy.YN8IJ2	-7.4818	9.68015e-24	5.43706e-21
arahy.L2M2QA	-7.44605	1.12895e-11	1.44719e-09
arahy.LDXX7Q	-7.38082	0.00124704	0.0250978
arahy.FN76PE	-7.3394	5.21578e-18	1.55697e-15
arahy.0FY2NM	-7.16323	0.00180716	0.0329808
arahy.61NS0W	-7.13955	3.98914e-08	2.87643e-06
arahy.T7DLBP	-6.5597	1.06808e-06	5.91351e-05
arahy.7W33YA	-6.54432	3.02227e-07	1.82995e-05
arahy.I1VY18	-6.48888	2.3891e-81	1.45691e-77
arahy.I1E7E1	-6.47523	3.55915e-07	2.14079e-05
arahy.2Z80QE	-6.45943	1.32513e-07	8.67571e-06
arahy.38X92K	-6.45943	1.32513e-07	8.67571e-06
arahy.DQ6KFY	-6.37876	2.50929e-11	3.08686e-09
arahy.04JW1L	-6.34696	1.05734e-09	9.6648e-08
arahy.9SPN5G	-6.32835	9.36487e-20	3.30379e-17
arahy.DUNV2U	-6.18763	2.31862e-05	0.000919842
arahy.AFL9DX	-5.9542	7.20162e-05	0.00246327
arahy.NCQ92W	-5.92935	1.54066e-50	3.86859e-47
arahy.LIG7UX	-5.90419	5.01281e-75	2.37757e-71
arahy.MJC5Q8	-5.89118	7.59709e-27	5.89631e-24
arahy.56Z1DA	-5.84549	0.000104698	0.00340845
arahy.M4G7E6	-5.79008	1.05497e-09	9.6638e-08
arahy.F5KWPZ	-5.65992	1.49242e-63	6.04334e-60
arahy.CPM77E	-5.65821	1.24797e-39	1.83697e-36
arahy.BNP26P	-5.63472	2.32466e-37	2.91861e-34
MSTRG.16401	-5.62644	3.49468e-10	3.4452e-08
arahy.W8QXVR	-5.61471	5.9503e-06	0.000273119
arahy.QUZ9E8	-5.57347	5.09354e-13	7.87783e-11
arahy.XVX6ST	-5.56571	1.55731e-63	6.04334e-60
arahy.FG3B3X	-5.52963	1.24726e-19	4.32859e-17
arahy.5I47GQ	-5.48113	0.000731108	0.0166232
MSTRG.43211	-5.42626	0.000393526	0.0101624
arahy.57F5XX	-5.41934	6.80739e-28	6.31711e-25
arahy.KLDP20	-5.37752	1.35051e-14	2.60857e-12
arahy.RQ5XX8	-5.36789	7.56063e-263	3.22741e-258
arahy.TP1Q44	-5.36565	1.06355e-08	8.2846e-07
arahy.85FVGB	-5.3339	0.00109555	0.0226908
arahy.Y173KB	-5.21981	1.8377e-33	1.96115e-30
arahy.9UEQ51	-5.18902	1.2136e-55	3.70036e-52
arahy.NZM2IS	-5.08746	6.49274e-08	4.53721e-06
arahy.TVNS6S	-5.08746	1.48574e-07	9.58031e-06
arahy.N5DCQN	-4.93664	1.48389e-19	5.10829e-17
arahy.T4LF8L	-4.90238	6.53254e-24	3.71806e-21
arahy.D2034S	-4.89077	0.00065056	0.0151091
arahy.C0Y0G1	-4.89077	0.000731332	0.0166232
arahy.73MM12	-4.88762	1.74845e-53	4.97573e-50
arahy.5DN2IL	-4.87036	0.000684474	0.0157425
arahy.32RTH6	-4.8686	0.0018827	0.0340249
arahy.R2LLHR	-4.86819	3.36525e-14	6.11287e-12
arahy.K1N414	-4.83542	1.47155e-22	7.22023e-20
arahy.42KS26	-4.8009	0.000209436	0.00601222
arahy.ZYZ79R	-4.7086	9.44329e-135	1.34369e-130
arahy.XMHW97	-4.62449	0.00230379	0.0399061
arahy.W2HKS7	-4.61923	6.86082e-27	5.52581e-24
arahy.7PS9BN	-4.55459	0.00298533	0.0479439
arahy.XZ7Y08	-4.51064	2.17038e-06	0.000112846
arahy.9DDU7S	-4.5025	0.000431368	0.0109346
arahy.FBZU85	-4.49709	1.58928e-17	4.49283e-15
arahy.HMP3A6	-4.49327	1.02251e-35	1.17967e-32
arahy.99RKF3	-4.4634	3.37734e-12	4.57678e-10
arahy.PK48VF	-4.4185	9.96696e-05	0.00327025
arahy.4RY61R	-4.37796	1.28812e-86	9.16433e-83
arahy.1CC5AH	-4.36923	2.51168e-07	1.56064e-05
MSTRG.17038	-4.35147	3.71533e-14	6.72018e-12
arahy.H8Z18X	-4.3339	0.00173338	0.0320177
arahy.3NB7SA	-4.32525	1.63867e-134	1.74874e-130
arahy.HCI8A4	-4.24793	2.21637e-06	0.000115097
arahy.ZPNK8K	-4.23977	8.99736e-62	3.20059e-58
arahy.Q1PJAN	-4.21723	0.000677054	0.0156224
arahy.23GIHT	-4.21453	8.73739e-10	8.16133e-08
arahy.7Z5EGL	-4.20387	0.00178753	0.0327616
arahy.E7PKRF	-4.1964	0.000639686	0.0149133
arahy.858FVG	-4.17217	1.00719e-77	5.37422e-74
arahy.G0ZX4A	-4.13012	0.000542743	0.0130967
arahy.D3YML1	-4.12928	0.00139034	0.0272495
arahy.Q3RSRR	-4.11042	7.85778e-06	0.000351231
arahy.AG833H	-4.08432	2.91745e-06	0.000147381
arahy.Z3D5KE	-4.03637	1.45016e-42	2.57929e-39
arahy.7A0A2P	-4.01898	4.83955e-59	1.58912e-55
arahy.L78ELK	-3.97379	2.1709e-111	1.85338e-107
arahy.E8SXRQ	-3.9645	1.8674e-25	1.2857e-22
MSTRG.16400	-3.90332	3.33211e-05	0.00126321
arahy.E6EV8K	-3.85664	4.10464e-05	0.00152626
arahy.41UHLG	-3.84713	4.16937e-05	0.00154495
arahy.X3ZDBL	-3.77897	0.000825593	0.0183171
MSTRG.1012	-3.73295	0.00147967	0.0286712
arahy.PWS1BC	-3.68806	0.000627098	0.0146679
arahy.D8JT6M	-3.66588	1.48045e-08	1.13446e-06
arahy.XXR9N9	-3.63296	9.63992e-35	1.05513e-31
arahy.D35KDK	-3.54253	0.00158179	0.0300899
MSTRG.33618	-3.53541	0.00119463	0.0242834
MSTRG.19534	-3.51715	1.62708e-06	8.72553e-05
arahy.2KW6XR	-3.50101	8.87159e-38	1.14758e-34
MSTRG.27876	-3.49052	0.000894304	0.0195158
arahy.H2EMZS	-3.48388	1.91418e-48	4.30056e-45
arahy.Y0RSJ9	-3.47768	2.46781e-21	1.01292e-18
arahy.06RI6S	-3.47249	3.25043e-09	2.71529e-07
arahy.CTTM8W	-3.4458	4.16785e-24	2.57845e-21
arahy.NIM4HJ	-3.32063	1.05812e-15	2.3525e-13
MSTRG.17167	-3.31952	0.00108649	0.0225688
arahy.G1IBX9	-3.3152	0.0013456	0.0266106
arahy.LGWD6U	-3.30875	3.68147e-06	0.000181548
arahy.FNG8N4	-3.30238	9.84077e-21	3.75065e-18
arahy.S3A1K2	-3.30152	1.49476e-27	1.32931e-24
arahy.ZDME3V	-3.29068	0.000353524	0.0093096
arahy.JLWB2C	-3.25927	0.00022221	0.00632788
arahy.HMY8CZ	-3.25074	1.58212e-05	0.000653427
arahy.M9AABA	-3.25047	7.20371e-21	2.82114e-18
arahy.DTPT92	-3.16993	0.00208913	0.0369269
arahy.206U1W	-3.15094	0.00295988	0.0476248
arahy.A621IZ	-3.12928	0.00293567	0.0473601
arahy.C2ZJE6	-3.10729	0.000106218	0.00344276
arahy.Y269WP	-3.10729	0.000106218	0.00344276
arahy.42CZAS	-3.09085	0.00224949	0.0392044
arahy.SB83T1	-3.0494	5.81452e-10	5.52794e-08
arahy.LB9ZWL	-3.04247	3.83552e-06	0.00018776
arahy.T3VW13	-3.03427	0.00160759	0.0303643
arahy.5YKU94	-3.03084	0.00102079	0.0216036
arahy.77CZVH	-3.02875	7.94292e-06	0.000353924
arahy.D4MEDX	-3.01999	1.3506e-40	2.13529e-37
arahy.SBZM2C	-3.00998	0.00171282	0.031734
arahy.6M4P9K	-2.99201	5.99119e-51	1.59841e-47
arahy.9W6N4W	-2.97461	1.47214e-05	0.000613686
arahy.78V50A	-2.96246	2.49583e-05	0.000981933
arahy.WFL2XE	-2.94205	1.41719e-21	5.93092e-19
MSTRG.37168	-2.93624	0.000552738	0.0132629
arahy.S2LEQH	-2.90761	0.00269111	0.0446501
arahy.80GNXC	-2.90507	2.67224e-24	1.6775e-21
arahy.S827EG	-2.90265	7.11808e-39	9.80159e-36
arahy.LHU2YI	-2.89924	0.000190526	0.00558147
arahy.L5L12B	-2.88827	0.000129313	0.00403026
arahy.AKB6VZ	-2.86364	2.22393e-10	2.26496e-08
MSTRG.3828	-2.86209	0.000467595	0.0116183
arahy.5X9SY8	-2.85599	3.39453e-05	0.00128459
arahy.3ZSM3L	-2.84503	0.00106736	0.0223465
arahy.TE0765	-2.84347	0.000119231	0.0037645
arahy.UM2SQV	-2.8346	4.45774e-50	1.05715e-46
arahy.E8HE72	-2.83188	0.000142297	0.0043889
arahy.S6ZM1I	-2.82312	2.10669e-11	2.62181e-09
arahy.6J67DK	-2.8124	2.09389e-11	2.61351e-09
arahy.J6ELEK	-2.80884	3.44723e-18	1.04363e-15
arahy.0NG64P	-2.80069	0.000348479	0.00919947
arahy.8GI8KI	-2.79129	2.4687e-05	0.000973051
arahy.HG2EVH	-2.78943	5.88756e-08	4.16097e-06
arahy.LLL633	-2.76586	2.38172e-10	2.40351e-08
arahy.92QFAZ	-2.75077	2.89551e-05	0.00112132
arahy.IE6GXI	-2.75055	0.000635484	0.0148397
arahy.JK7EPH	-2.75041	1.03088e-29	1.04775e-26
MSTRG.48902	-2.73697	1.11656e-07	7.4589e-06
arahy.N96YDH	-2.72483	2.66249e-44	5.16607e-41
arahy.TUUC7L	-2.7211	0.000413896	0.0105768
arahy.CYMD29	-2.71716	0.000960673	0.0205555
arahy.A9G6ZW	-2.71621	1.06137e-08	8.28273e-07
arahy.ISKM3Z	-2.71484	4.02151e-05	0.00150189
arahy.XB7AYI	-2.71484	0.000134966	0.00418697
arahy.YP2NLQ	-2.71049	2.84518e-06	0.000144243
arahy.FW2V6H	-2.70657	1.97287e-05	0.000794489
arahy.Z412LG	-2.69581	0.000467995	0.0116215
arahy.VJ6NUA	-2.68886	1.28218e-07	8.43335e-06
arahy.0JE8SP	-2.68012	0.00143798	0.0280032
arahy.D7Q1BT	-2.66297	0.000172888	0.0051465
arahy.SG1KTY	-2.66297	0.000172888	0.0051465
arahy.ZFC6L6	-2.64689	0.00115343	0.0236033
arahy.B1GS7P	-2.64148	2.3451e-09	2.01419e-07
arahy.F5KIND	-2.64148	2.3451e-09	2.01419e-07
arahy.0XXG28	-2.62023	1.30415e-22	6.47328e-20
arahy.D4J6IB	-2.61775	0.00015539	0.00469105
arahy.4TV0N2	-2.61512	0.000117054	0.00370675
arahy.JU6U3Y	-2.61068	4.91051e-08	3.51703e-06
arahy.U8DE7V	-2.60204	2.90621e-07	1.77225e-05
arahy.26JPZN	-2.59652	3.1899e-11	3.87941e-09
arahy.0IQ56K	-2.58311	4.42067e-11	5.12786e-09
arahy.Y7RZ17	-2.5787	1.13969e-22	5.79167e-20
arahy.MX5WXF	-2.57802	4.80442e-10	4.62948e-08
arahy.X181HS	-2.57517	1.39596e-27	1.26786e-24
arahy.P7SNS1	-2.57238	4.75992e-37	5.80533e-34
arahy.259MTB	-2.56857	6.3722e-11	7.1021e-09
arahy.M043T1	-2.56647	7.97296e-26	5.57938e-23
arahy.8WED6E	-2.56575	5.35071e-05	0.00192423
arahy.89XXPU	-2.53887	5.5845e-11	6.30649e-09
arahy.JH251T	-2.53337	5.65093e-19	1.82743e-16
arahy.L6ZB0I	-2.52937	0.000102392	0.00334159
MSTRG.17221	-2.52513	7.15132e-06	0.000323377
arahy.GGEE3T	-2.49432	0.000251978	0.00705787
arahy.Y24I4W	-2.48471	5.76194e-05	0.00203778
arahy.HR6FN8	-2.48239	0.00313248	0.0499127
arahy.U34X7W	-2.48054	1.44607e-09	1.30228e-07
arahy.ZN78HF	-2.47984	3.75546e-07	2.24298e-05
arahy.42EX8Y	-2.46474	1.50186e-14	2.87489e-12
arahy.FY9BZZ	-2.43904	1.59225e-05	0.000655434
arahy.7R1Z85	-2.43888	0.00117149	0.0238814
arahy.SZWP5S	-2.42938	3.42186e-05	0.00129379
arahy.UG5UID	-2.42175	7.87311e-07	4.4455e-05
arahy.6SHE48	-2.41115	5.99698e-06	0.000274966
MSTRG.19946	-2.39444	0.00112759	0.0231969
arahy.T76A9L	-2.39248	9.22035e-43	1.71126e-39
arahy.N36EZS	-2.38793	0.000203423	0.00586327
arahy.6JCP40	-2.38133	1.66124e-13	2.71699e-11
arahy.PCV855	-2.37841	1.5488e-12	2.19647e-10
MSTRG.45624	-2.37315	5.1268e-05	0.00184838
arahy.Y1VXK6	-2.37299	3.39663e-09	2.82636e-07
arahy.LW385E	-2.3322	1.85438e-05	0.000751023
arahy.GSD986	-2.33202	0.000146253	0.00448823
arahy.LXJ7K2	-2.31996	9.25442e-06	0.000407261
arahy.8061QC	-2.31727	1.27568e-05	0.000542921
arahy.632UCW	-2.30293	0.000506958	0.0124299
arahy.WS4P7I	-2.27893	1.17735e-26	8.9746e-24
arahy.U7ZK73	-2.27684	0.00164686	0.0308467
arahy.F47PG2	-2.24793	0.00264674	0.0440641
arahy.25U7NT	-2.24724	0.00248921	0.0421487
arahy.12W07B	-2.23462	3.16675e-18	9.79557e-16
arahy.6Q1KS5	-2.22952	8.15495e-08	5.58765e-06
arahy.TF3SPP	-2.22329	0.000191255	0.0055957
arahy.EBZQ4K	-2.21459	0.00248235	0.0420493
arahy.V5ZBYQ	-2.2109	0.000113086	0.00361326
arahy.019LBF	-2.20163	5.50928e-05	0.00197129
arahy.GVJC4J	-2.1979	3.94038e-40	6.00725e-37
arahy.F5FTS9	-2.1975	4.63102e-07	2.72245e-05
MSTRG.13504	-2.19052	0.00219364	0.0384085
arahy.9P6YIX	-2.16703	1.63618e-09	1.45507e-07
arahy.2XVM9C	-2.16146	5.47746e-08	3.89694e-06
arahy.S57KMF	-2.15322	8.9462e-14	1.53368e-11
MSTRG.42021	-2.14684	0.000404649	0.0103873
MSTRG.14411	-2.1375	0.00178567	0.0327427
arahy.W7ZTHA	-2.1302	4.29963e-05	0.00158633
arahy.F5ML4Q	-2.12211	8.16222e-05	0.00273701
arahy.2V5WTZ	-2.09592	0.00171107	0.0317154
arahy.BC0JZ1	-2.09222	3.45567e-06	0.000172934
arahy.AXAR8E	-2.0872	5.16654e-38	6.892e-35
arahy.71H07L	-2.08326	0.00305619	0.0488979
arahy.FH4MAJ	-2.08274	0.000650443	0.0151091
arahy.TF0YG1	-2.08269	0.000196582	0.00569687
arahy.FEJ3DR	-2.078	0.00175304	0.0323109
arahy.04ZIEQ	-2.06515	0.000102819	0.00335296
arahy.SLB9HH	-2.06201	0.000410936	0.0105166
arahy.PZ4M2K	-2.03885	1.85202e-17	5.13357e-15
arahy.PMAQ5N	-2.03528	0.000304996	0.00829259
arahy.S242D2	-2.01755	5.00137e-05	0.00181286
arahy.LJQ8FI	-2.01402	0.000290254	0.00794734
arahy.2G4BRW	-2.00434	1.09934e-07	7.35542e-06
arahy.84QHVJ	-2	0.000823215	0.0182812
arahy.89BLSN	-1.99614	1.48241e-11	1.88333e-09
arahy.1AZ5A9	-1.98633	0.00274288	0.0451893
arahy.3CP6K6	-1.98633	0.00274288	0.0451893
arahy.RF7AVT	-1.98194	0.000599652	0.0141657
arahy.E47MBS	-1.97965	0.000483205	0.0119367
arahy.DM1378	-1.97683	2.44489e-07	1.52358e-05
arahy.D0BYI1	-1.96963	0.00229914	0.0398958
arahy.WC4CIS	-1.96847	1.98991e-41	3.39773e-38
arahy.4U7REM	-1.96818	0.00243494	0.0414766
arahy.5NL3D9	-1.95798	1.44979e-26	1.08574e-23
MSTRG.2877	-1.94922	1.03748e-11	1.33797e-09
arahy.1F61Q2	-1.94819	5.90763e-06	0.000271452
arahy.QC0SSE	-1.94578	0.000924563	0.0200163
arahy.QM99BA	-1.94205	0.000250561	0.00702741
arahy.UKS4G3	-1.93947	7.41138e-20	2.63641e-17
arahy.N94NTJ	-1.93683	2.68912e-10	2.70096e-08
arahy.SXMW95	-1.92992	0.000956918	0.0205157
arahy.NY8BVK	-1.92862	0.000432568	0.010952
arahy.V45V7K	-1.92274	2.35037e-09	2.01466e-07
arahy.PIH8R2	-1.91348	0.000186084	0.00547818
arahy.441Z8B	-1.91263	7.02478e-06	0.00031833
arahy.U9CUV0	-1.90975	0.000229716	0.00650257
arahy.V8868B	-1.90916	4.01278e-15	8.23526e-13
arahy.S6SHXY	-1.90293	2.16594e-17	5.81494e-15
arahy.PH1SAB	-1.90182	4.15379e-05	0.00154185
arahy.QXQR94	-1.89287	1.05521e-05	0.000459161
MSTRG.28413	-1.87676	0.000894015	0.0195158
arahy.7WV7S8	-1.87213	0.000832267	0.0184193
arahy.ZH7W5S	-1.86207	5.77479e-06	0.000267363
arahy.D57QFM	-1.8602	0.000145574	0.0044738
arahy.H47VCY	-1.85912	2.18797e-18	6.8675e-16
arahy.M4B5E0	-1.8564	2.50874e-09	2.12904e-07
arahy.KW8CFQ	-1.83858	0.00129461	0.0258723
arahy.WG90F5	-1.83646	0.00132259	0.0262464
arahy.8G1XAU	-1.82897	9.96952e-08	6.71244e-06
arahy.FBA9Q8	-1.82823	1.48296e-08	1.13446e-06
arahy.V2FEV8	-1.82823	1.48296e-08	1.13446e-06
arahy.C9KM7P	-1.80735	0.000448131	0.0112262
arahy.WZFE91	-1.80591	0.00304719	0.0487904
arahy.GN9VME	-1.79518	5.27387e-07	3.06293e-05
arahy.NTNX6Y	-1.78898	0.00180112	0.0329129
arahy.UKNP9M	-1.78055	0.000344729	0.00912703
arahy.AM9K54	-1.77449	2.29259e-13	3.72106e-11
arahy.RBAX1J	-1.77138	3.01312e-06	0.000151855
arahy.SY37LP	-1.77041	1.69436e-06	9.05219e-05
arahy.FHLQ2C	-1.76894	1.21777e-08	9.45148e-07
arahy.GXR6MB	-1.76651	0.00240845	0.0411403
arahy.U2ZU7L	-1.7617	1.30104e-23	7.1202e-21
arahy.1UCA9V	-1.7516	5.08936e-16	1.16741e-13
arahy.0UZT5Y	-1.74761	0.000579976	0.0138078
arahy.V5BWWI	-1.74574	6.79335e-08	4.73836e-06
arahy.U3VQ4U	-1.74555	5.08254e-16	1.16741e-13
arahy.08H2K0	-1.73359	1.72536e-11	2.17258e-09
arahy.N0UQ4E	-1.72806	0.00178533	0.0327427
arahy.D34PF8	-1.7246	0.00161448	0.0304579
arahy.4YP1G2	-1.7241	1.15612e-05	0.000496991
arahy.19E8GC	-1.71948	7.39125e-14	1.29307e-11
arahy.3ZDQ4J	-1.71906	5.88248e-05	0.00207354
arahy.NU16HH	-1.71753	0.000440146	0.0110978
arahy.J1Z9L2	-1.71683	0.00105506	0.0221532
MSTRG.19128	-1.71445	9.74432e-08	6.58158e-06
arahy.VC882V	-1.7126	6.05793e-07	3.48511e-05
arahy.H64XLR	-1.70981	4.55274e-06	0.000218363
arahy.XIEE6H	-1.70463	5.03917e-07	2.93862e-05
MSTRG.5200	-1.69666	1.09505e-05	0.000474283
arahy.0IC8QA	-1.69534	0.00062618	0.0146545
arahy.KNQB38	-1.69322	0.00311737	0.049709
arahy.YP3YKY	-1.68314	0.00196817	0.0352561
arahy.9T6609	-1.67859	2.84951e-10	2.83939e-08
arahy.PU29YL	-1.66069	2.66954e-13	4.30018e-11
arahy.UU73T8	-1.6568	0.000111006	0.00356536
arahy.1VZ0XU	-1.65244	2.60908e-07	1.61645e-05
arahy.Y0P616	-1.6483	0.00242014	0.0412574
arahy.E55NPH	-1.64307	0.00304398	0.0487574
MSTRG.15585	-1.64046	0.000411932	0.0105357
MSTRG.19892	-1.63979	0.0010098	0.0214242
arahy.ZL8GWI	-1.63209	5.07562e-12	6.72866e-10
arahy.3V8BTX	-1.63111	4.90396e-05	0.00178158
arahy.T01IT8	-1.6231	1.40602e-06	7.63596e-05
arahy.0FU07W	-1.61702	0.00247021	0.0418769
arahy.Q8JEHC	-1.61667	7.55589e-05	0.00256762
MSTRG.3399	-1.61531	3.43833e-05	0.00129772
arahy.S0ULK2	-1.60881	0.00250882	0.0423241
arahy.AG0KCB	-1.60492	6.2266e-08	4.36445e-06
arahy.IJ39UE	-1.60492	6.2266e-08	4.36445e-06
arahy.EKFN80	-1.6032	8.71119e-05	0.00290058
arahy.12M25E	-1.59883	2.92238e-05	0.00112911
arahy.A8XJ49	-1.5967	0.000759976	0.0171811
arahy.E1UNHC	-1.59264	0.000329221	0.0087999
arahy.KWX84I	-1.59225	6.58751e-13	1.00072e-10
arahy.T1SZCK	-1.58763	1.40588e-07	9.16225e-06
arahy.Q892TN	-1.58105	4.17295e-06	0.000202421
arahy.B3VI1A	-1.57916	0.00038998	0.0100891
arahy.Y7U2IY	-1.57693	3.14434e-08	2.31418e-06
arahy.6374NN	-1.57469	0.0013607	0.0268163
arahy.MDB4JZ	-1.57004	0.000636847	0.0148634
arahy.H8IU2A	-1.56884	0.00289949	0.0468828
arahy.YG0QBR	-1.56506	0.000938562	0.0202141
arahy.BH211Y	-1.56178	0.000719967	0.0164261
arahy.U2TVB1	-1.5616	0.000408038	0.0104487
arahy.NJ5037	-1.55748	0.00196061	0.0351649
arahy.8BV56R	-1.55651	7.22824e-05	0.00246841
arahy.RKK33X	-1.55526	3.04744e-11	3.72739e-09
arahy.D324NA	-1.55467	2.29426e-08	1.71215e-06
arahy.U54SN6	-1.55434	4.50075e-16	1.04415e-13
arahy.T65EYX	-1.5536	0.00013279	0.0041315
arahy.H4ADU3	-1.55336	0.000114471	0.00364386
arahy.7ZT4LX	-1.55141	6.74606e-06	0.00030635
arahy.H9B6MV	-1.54943	0.000900809	0.0196088
arahy.84IAJ5	-1.54916	6.25217e-05	0.00216629
arahy.1V58TW	-1.54639	0.000360837	0.00946134
arahy.T87YCG	-1.5459	1.41669e-07	9.21865e-06
arahy.H70GWQ	-1.54425	8.05974e-05	0.0027133
arahy.WD2ETH	-1.54129	0.000716886	0.0163645
arahy.3D57QD	-1.54094	5.08776e-05	0.00183897
arahy.SZD3Q1	-1.54057	1.99597e-11	2.49859e-09
arahy.PDB40E	-1.5381	0.000121179	0.00381753
arahy.BL385Q	-1.53563	0.000504984	0.0124101
MSTRG.36625	-1.53242	2.75324e-07	1.68861e-05
arahy.C25ZDC	-1.53083	4.90443e-13	7.61293e-11
arahy.ABBA5Z	-1.53043	3.25705e-05	0.00124137
arahy.ZP8MLZ	-1.52846	1.23147e-05	0.000525151
arahy.GMF3XI	-1.52748	3.44712e-06	0.000172708
MSTRG.47764	-1.52693	0.000703014	0.0160996
arahy.6A53IY	-1.52247	1.26898e-10	1.34748e-08
MSTRG.29244	-1.51467	1.65436e-05	0.000676435
arahy.Q94UE0	-1.50627	7.94235e-06	0.000353924
arahy.MR10IA	-1.49792	2.41215e-05	0.000953402
arahy.TM123A	-1.49725	8.83773e-06	0.000389728
arahy.3VG3YI	-1.49683	0.00280361	0.0458184
MSTRG.161	-1.49469	1.70032e-09	1.50897e-07
arahy.S7A2EF	-1.49282	0.0023286	0.0402596
arahy.WH4ILY	-1.48974	9.13387e-05	0.00302531
arahy.H49T8T	-1.48133	2.38475e-12	3.26275e-10
arahy.U9Y6Z5	-1.47932	1.56823e-07	1.00818e-05
arahy.GP73H9	-1.47684	3.29733e-05	0.00125337
MSTRG.18077	-1.47683	1.15028e-07	7.63639e-06
MSTRG.6108	-1.47673	9.14737e-05	0.00302693
arahy.E2TLBW	-1.47627	5.20084e-06	0.000242897
arahy.H0PYWT	-1.47627	5.20084e-06	0.000242897
arahy.QSK9AI	-1.47506	4.65945e-05	0.00170435
arahy.7FY2VB	-1.47125	4.29411e-05	0.00158566
arahy.29A50M	-1.46506	1.84811e-05	0.000749196
arahy.B8AVXR	-1.46502	0.00110629	0.0228688
arahy.JUAS4E	-1.46336	6.03501e-07	3.4766e-05
arahy.2KG4P3	-1.4587	0.000692291	0.0158795
arahy.VNR42Z	-1.45317	5.00281e-05	0.00181286
arahy.5B5NV8	-1.45218	0.000845089	0.0186163
arahy.DS72B3	-1.4442	0.000315603	0.0085188
arahy.X2DMBM	-1.44057	2.89742e-05	0.00112132
arahy.ITJF75	-1.4386	0.000362268	0.00948719
arahy.DB2P39	-1.4385	1.75396e-14	3.32761e-12
arahy.52QCLV	-1.43539	1.44317e-05	0.000603375
arahy.1W477Y	-1.43347	1.46745e-07	9.49104e-06
arahy.4YM5KJ	-1.43254	2.59725e-08	1.9248e-06
arahy.SKE9RM	-1.43234	6.5655e-05	0.00226566
MSTRG.14024	-1.42969	1.76706e-10	1.83084e-08
arahy.M3HHRX	-1.42935	0.000228966	0.00648883
arahy.CVU4LC	-1.42931	4.32731e-05	0.00159379
arahy.14QNZ5	-1.42928	0.00074796	0.016956
arahy.6LQ9DQ	-1.42906	0.00206084	0.036548
arahy.CLXM2V	-1.42864	1.03811e-07	6.9676e-06
arahy.THM2IN	-1.42815	0.000673747	0.0155713
arahy.VDH4YT	-1.42751	4.4667e-06	0.00021496
arahy.6Z1DTG	-1.42282	3.69092e-06	0.000181723
arahy.MKJ6RV	-1.40479	0.00125938	0.0253222
arahy.34CRUF	-1.40079	9.98031e-14	1.68391e-11
arahy.ZYC5JB	-1.40071	0.000104888	0.00340845
arahy.5A3FI2	-1.39961	0.002315	0.0400714
arahy.T091EQ	-1.39917	0.00188547	0.0340606
arahy.PRL389	-1.39892	1.07584e-09	9.81295e-08
arahy.76C240	-1.39782	7.17041e-05	0.00245653
arahy.EW7TJJ	-1.39486	0.000779182	0.0175058
arahy.52VG2X	-1.39404	0.00136845	0.0269319
arahy.DFT7B3	-1.39232	0.000194508	0.00565775
MSTRG.22480	-1.39017	5.87616e-10	5.57413e-08
arahy.A6N0MA	-1.38853	0.000813786	0.0181116
arahy.AT476Q	-1.37884	3.012e-05	0.00115936
arahy.4721MN	-1.37736	0.00187547	0.0339374
arahy.9J0NPV	-1.37636	8.9409e-07	5.01525e-05
arahy.FYP59N	-1.37572	4.06277e-05	0.00151465
arahy.V2ZUG7	-1.37173	0.00092345	0.0200163
arahy.5V6QPU	-1.37137	0.00292177	0.0471893
arahy.A9E03W	-1.36969	0.00127525	0.0255932
arahy.QLUK9J	-1.36337	0.00107653	0.0224317
arahy.I6G4LG	-1.36191	0.00282018	0.0460187
arahy.YNET3T	-1.36149	3.05035e-05	0.00117201
arahy.1E8W48	-1.3556	3.7873e-08	2.74014e-06
arahy.1TPR6M	-1.35302	0.000261405	0.00728367
arahy.UN8RND	-1.3484	1.73724e-09	1.53854e-07
arahy.AT9VNX	-1.34817	0.000274975	0.00760566
arahy.A8JEVC	-1.34597	0.00149263	0.0288345
arahy.IHT531	-1.3457	0.00304112	0.0487481
MSTRG.19798	-1.3447	1.80689e-05	0.000733877
arahy.95DHJ9	-1.3403	2.32421e-06	0.000120259
arahy.0T4V2C	-1.33396	1.09552e-05	0.000474283
arahy.V8I50K	-1.33307	6.40536e-05	0.00221577
arahy.098P1D	-1.33106	0.000549854	0.0132086
arahy.YKB5HU	-1.33106	0.000549854	0.0132086
arahy.M1JRW6	-1.32429	0.000565966	0.0135195
arahy.X41X8Q	-1.32304	0.000453036	0.0113291
arahy.S0TT2Y	-1.31597	3.80466e-05	0.00142966
arahy.SI7AR4	-1.31494	0.000874171	0.0191461
arahy.SIZM0A	-1.30888	7.41531e-05	0.00252624
arahy.31KTN8	-1.30735	0.00170895	0.0316898
arahy.S4Z9Q7	-1.30446	1.38404e-07	9.03373e-06
arahy.6VZ2KG	-1.30314	0.00159145	0.0301261
arahy.GI9T10	-1.30247	1.56373e-10	1.64817e-08
MSTRG.6235	-1.29878	2.37952e-09	2.03557e-07
arahy.PJ98Y2	-1.29624	5.78712e-06	0.000267643
arahy.AI0BYL	-1.29328	0.00045977	0.0114586
arahy.TY87ZU	-1.2901	1.42106e-12	2.03975e-10
arahy.8QDS1I	-1.28687	1.66368e-05	0.000679593
arahy.FJH25Q	-1.28474	9.73504e-07	5.41093e-05
arahy.IQ2E51	-1.28278	0.0010804	0.022486
arahy.X4ZQ0T	-1.2783	4.77458e-05	0.0017405
arahy.TJQ42N	-1.27798	3.75695e-07	2.24298e-05
arahy.W30BWE	-1.27518	7.22591e-05	0.00246841
arahy.GI7SC3	-1.2716	1.08227e-06	5.97656e-05
arahy.6X3X3D	-1.27151	0.00285272	0.0463725
arahy.1HLM41	-1.27023	0.00250948	0.0423241
arahy.Q4JBZ8	-1.27023	0.00250948	0.0423241
arahy.F6GGDR	-1.26972	3.38912e-07	2.04338e-05
arahy.92DGJ8	-1.26849	1.2056e-05	0.000514635
arahy.46SZIZ	-1.26757	3.31497e-05	0.00125783
arahy.880Q5H	-1.26449	0.00101454	0.0215032
MSTRG.16316	-1.2641	0.00114166	0.0233961
arahy.QEV1Q9	-1.26189	1.48223e-06	8.01924e-05
arahy.L53237	-1.25602	6.93186e-11	7.67777e-09
arahy.XA63TZ	-1.25598	0.00129874	0.0259305
arahy.IH9SIN	-1.2533	0.000745626	0.0169121
MSTRG.33246	-1.24755	0.00120478	0.0244664
arahy.XPA4BD	-1.24675	0.000154845	0.00468122
arahy.Y8TVDJ	-1.24444	0.000124801	0.00390856
arahy.NX8KLK	-1.24299	0.00105613	0.0221647
MSTRG.44845	-1.24101	0.00141725	0.0277104
arahy.TD4UZM	-1.23882	4.14166e-07	2.4589e-05
arahy.U2UX9Q	-1.2368	2.76131e-19	9.13736e-17
arahy.YJ1J9B	-1.23613	3.94647e-11	4.65367e-09
arahy.G7HRZN	-1.23447	0.00098475	0.0209761
arahy.06CHHF	-1.23298	0.000150642	0.00458011
arahy.293ST4	-1.2277	2.65316e-06	0.000135798
arahy.DN5312	-1.22734	2.52833e-11	3.10135e-09
arahy.LMQR93	-1.22575	4.65499e-10	4.49565e-08
arahy.B4TR6Y	-1.22453	4.70027e-06	0.000224179
arahy.F1TUFL	-1.22301	4.39797e-05	0.00161842
arahy.VH7VLJ	-1.22259	3.75349e-08	2.72492e-06
arahy.1026BX	-1.21741	1.29516e-08	1.00005e-06
arahy.R4CPVK	-1.216	2.75859e-06	0.00014052
arahy.U59Q9U	-1.21483	5.68733e-08	4.03281e-06
arahy.KRC5M1	-1.21275	4.95488e-05	0.00179855
arahy.X9WA5F	-1.21268	0.000100964	0.00330508
arahy.DY30JI	-1.21047	0.00216774	0.0381113
arahy.6C7RIH	-1.20924	2.42329e-05	0.000956921
arahy.IT30K9	-1.20876	0.000149927	0.00456757
arahy.H4MKL1	-1.19546	0.00015323	0.00463895
arahy.ZT5PYH	-1.1952	1.64052e-05	0.000672062
arahy.UC0Y85	-1.1912	4.56954e-06	0.00021861
arahy.6RSG0I	-1.19065	4.09622e-12	5.51594e-10
arahy.SNDR2D	-1.18749	2.84959e-10	2.83939e-08
arahy.WJTY0M	-1.18075	0.00114528	0.0234477
arahy.HLIX3I	-1.18015	2.29019e-07	1.43556e-05
MSTRG.3430	-1.17796	0.000533069	0.0129217
arahy.W3EFV3	-1.17545	0.000518321	0.012636
arahy.AG2MXP	-1.17454	1.4809e-10	1.56473e-08
arahy.B5JY05	-1.17099	1.33268e-13	2.20497e-11
arahy.TYJ1PE	-1.16906	5.41586e-05	0.00194306
arahy.IJ2E5N	-1.16556	8.0902e-05	0.00271926
arahy.8W7DG1	-1.16032	0.000582279	0.0138472
arahy.BX7IVG	-1.15555	1.43895e-05	0.0006022
arahy.AAED67	-1.152	0.000506664	0.0124299
arahy.4TSV6W	-1.14346	1.16036e-05	0.000498311
arahy.VRRB4A	-1.14271	0.000585321	0.0139118
arahy.AGSV49	-1.14171	4.16978e-15	8.51652e-13
arahy.PEG0RN	-1.14056	5.42028e-08	3.8627e-06
arahy.31P59F	-1.13911	0.00204311	0.0363091
arahy.FMR35J	-1.1383	0.00109298	0.0226486
arahy.1B7IGJ	-1.12899	0.00283283	0.0461369
arahy.EBNE7V	-1.12892	0.00146795	0.0284571
arahy.HQ66FD	-1.12647	1.56575e-05	0.000647649
arahy.15VG0N	-1.1185	3.87056e-08	2.79565e-06
arahy.8VXK9L	-1.11624	0.00295285	0.0475296
arahy.SPD1GG	-1.11171	2.54673e-05	0.000999196
arahy.B0G4GL	-1.10852	0.000979276	0.0208803
arahy.J2FWCG	-1.10766	2.68204e-06	0.000136948
arahy.PT27R6	-1.1072	0.00124435	0.0250672
arahy.4L43B4	-1.09748	6.05068e-06	0.000276797
arahy.RHR23G	-1.09746	1.63562e-07	1.04835e-05
arahy.T2VPZC	-1.09419	9.06655e-06	0.000399405
arahy.D7XM6E	-1.09245	3.55521e-06	0.000176878
arahy.J17R0W	-1.09158	0.00205205	0.0364225
arahy.MX9883	-1.08924	0.00179029	0.0327818
arahy.1R75EY	-1.08549	0.000763451	0.0172249
arahy.SM45K0	-1.08439	0.00237502	0.0407978
arahy.HW5QP5	-1.0813	0.00246401	0.0418509
arahy.271GPI	-1.08066	0.000519948	0.0126585
arahy.5GYD3M	-1.08003	0.0012664	0.0254514
arahy.KJNT9S	-1.07928	0.00054811	0.0131889
arahy.QB6IYK	-1.07928	0.00054811	0.0131889
arahy.3WQI06	-1.07174	3.35197e-06	0.000168138
arahy.76C20C	-1.06386	9.98361e-05	0.0032732
arahy.QR9HB8	-1.0613	0.00159888	0.0302399
arahy.V64N20	-1.05727	9.62363e-06	0.000422204
arahy.1QW2C7	-1.05696	0.000920063	0.019977
arahy.Y4ERM2	-1.05603	2.08135e-05	0.000832678
arahy.K8NQ3M	-1.05524	2.65591e-07	1.63834e-05
arahy.T13XGJ	-1.05479	0.00176096	0.0324148
arahy.HJJ4ZR	-1.05156	0.00241911	0.0412574
arahy.GW0K52	-1.05051	2.34883e-05	0.000930096
MSTRG.35098	-1.04772	0.00120388	0.0244597
arahy.SGCH0F	-1.04753	8.998e-05	0.00298909
arahy.R1CM9X	-1.04707	3.82293e-10	3.74287e-08
arahy.T6ZY4C	-1.04599	0.00139328	0.0272947
arahy.VW08M3	-1.04506	7.77855e-11	8.53581e-09
arahy.C9S01M	-1.04138	3.68162e-06	0.000181548
arahy.YYFQ06	-1.03659	4.71539e-06	0.000224649
arahy.3X1084	-1.03645	0.00246531	0.0418509
arahy.EC4LZV	-1.02985	1.06017e-10	1.13993e-08
arahy.GR2U56	-1.02626	0.00165149	0.0309063
arahy.2W4YK6	-1.0249	4.99901e-07	2.91919e-05
arahy.MWT26D	-1.02202	0.00233934	0.0404126
arahy.MMWN9B	-1.01799	0.00228606	0.0397332
arahy.29D948	-1.01676	4.56819e-06	0.00021861
arahy.XI0ITM	-1.01557	0.000564861	0.0135085
arahy.ZK641K	-1.01518	1.6385e-08	1.24453e-06
arahy.0TWQ75	-1.01503	0.000822415	0.0182812
arahy.GKYN88	-1.01326	2.09644e-06	0.000109402
arahy.D801R8	-1.01228	3.56071e-07	2.14079e-05
arahy.4R9DEN	-1.01188	0.000127565	0.00398927
arahy.738LAH	-1.01182	0.000587739	0.0139615
arahy.AL9EYS	-1.01132	0.000862405	0.0189212
arahy.0UWS9P	-1.01058	0.000372208	0.00967039
arahy.M3F96W	-1.00884	3.1094e-10	3.08676e-08
arahy.CC6LIU	-1.00832	0.00104604	0.0220287
arahy.KM5KAV	-1.00801	0.00169285	0.0314596
arahy.ZFZQ7Q	-1.00781	0.00103492	0.0218268
arahy.ALL5TI	-1.00684	3.253e-05	0.00124094
arahy.XR90DA	-1.00285	6.68432e-07	3.81972e-05
MSTRG.18450	-1.00248	0.00148593	0.0287534
arahy.JIRJ73	1.00108	3.15355e-05	0.00120623
arahy.SQ16A9	1.00123	8.84374e-09	6.96376e-07
arahy.PWY63Z	1.00237	0.0022222	0.0387972
arahy.F1289G	1.00245	4.39342e-06	0.000212152
MSTRG.645	1.00314	0.000789331	0.0176927
arahy.UKMX5Y	1.00371	2.60042e-05	0.00101683
arahy.X9C0XD	1.00376	0.00152199	0.029268
MSTRG.14189	1.00421	0.00269237	0.0446501
arahy.UR6RUF	1.00476	6.23354e-05	0.00216158
arahy.7RBI59	1.00513	0.0010534	0.0221292
arahy.G7F5HX	1.00575	0.000999492	0.021216
arahy.X5IC73	1.00714	3.79178e-07	2.26061e-05
arahy.BQAG9X	1.00759	3.20242e-19	1.05155e-16
arahy.2W47TI	1.00964	5.37743e-06	0.000249779
arahy.SHB49X	1.00974	2.07065e-06	0.000108392
arahy.P2ZS9F	1.01017	1.89829e-06	0.000100164
arahy.2E3RSG	1.01032	0.00200446	0.0357412
arahy.P126ME	1.01074	7.29078e-07	4.14409e-05
arahy.TFY1SD	1.01186	6.09512e-05	0.00212376
arahy.HV242L	1.01558	2.75678e-08	2.03596e-06
arahy.VHAI7W	1.0164	0.00018239	0.00539649
arahy.D98YRY	1.01802	0.000727027	0.0165606
arahy.2R4GL5	1.02046	4.9672e-06	0.000234293
arahy.A9PKKK	1.02191	3.15159e-05	0.00120623
arahy.PFQ67U	1.0236	5.64228e-05	0.0020071
arahy.AL94LI	1.02389	0.000534254	0.0129357
arahy.N28W6S	1.02425	7.39603e-08	5.09217e-06
arahy.WD6S8S	1.02713	0.000367009	0.00957026
arahy.YW2RJ0	1.02828	2.27028e-08	1.69722e-06
arahy.2U0JEX	1.02913	4.94934e-06	0.000233967
arahy.NJE7MY	1.03121	3.88217e-05	0.00145622
arahy.BCGS99	1.03184	0.00203846	0.0362566
arahy.KCMD1F	1.03699	1.01583e-08	7.94193e-07
arahy.I7WXBP	1.03827	1.73898e-05	0.000708994
arahy.D6EEK4	1.03959	2.04494e-17	5.59566e-15
arahy.780T1G	1.03976	4.52482e-05	0.00165937
MSTRG.27019	1.04117	0.00279358	0.0457629
arahy.B3SD72	1.04282	3.64185e-06	0.000180557
arahy.81ICF1	1.04389	0.00218331	0.0382905
arahy.L5KNP4	1.04544	0.00155648	0.0296947
arahy.HPB1RW	1.04577	0.000290436	0.00794734
arahy.S8GTV1	1.04884	4.74854e-12	6.31467e-10
arahy.DI0MSX	1.04932	7.05177e-06	0.000319214
arahy.F9SXFF	1.05016	0.000223528	0.00635692
arahy.Y6JXG3	1.05046	5.00073e-06	0.000235614
MSTRG.19942	1.05046	0.00197611	0.0353516
MSTRG.17616	1.05109	0.00115656	0.0236448
arahy.LMG1BG	1.05227	0.00136767	0.0269289
arahy.VLT6V3	1.05286	4.47275e-06	0.00021501
MSTRG.33773	1.05301	3.85115e-06	0.000188309
arahy.W97VC3	1.05355	0.000218559	0.00624056
MSTRG.17441	1.05537	2.24661e-06	0.000116526
arahy.ZSX3H1	1.05697	1.66838e-07	1.06614e-05
MSTRG.38233	1.05703	0.00179088	0.0327818
arahy.X24JN2	1.05972	2.15537e-17	5.81494e-15
arahy.M8BQP4	1.06049	0.00153711	0.0294632
arahy.RA3MKB	1.06093	1.99106e-08	1.50163e-06
arahy.I66GUF	1.06538	0.00121565	0.0246052
arahy.SAK0JK	1.0661	2.12271e-10	2.17295e-08
MSTRG.17365	1.06641	7.95797e-06	0.000354225
arahy.HN33BR	1.06651	2.05501e-05	0.000823682
arahy.JF91KJ	1.06734	5.19152e-06	0.000242897
arahy.CRNC3Y	1.06888	1.32465e-06	7.21239e-05
arahy.MWJV5X	1.07039	7.76969e-05	0.00262809
arahy.18NYVC	1.07309	4.40309e-07	2.60686e-05
arahy.04HYJ8	1.07398	3.4924e-11	4.19944e-09
arahy.NH5LZK	1.07424	1.36982e-12	1.99568e-10
arahy.9G7IH4	1.07547	0.000289556	0.00793774
arahy.BK36SG	1.07557	0.000141417	0.00436805
arahy.8X2RLQ	1.07637	9.08988e-10	8.3987e-08
arahy.Z34153	1.07917	6.94268e-11	7.67777e-09
arahy.6H6BBQ	1.08039	5.61863e-10	5.35363e-08
arahy.HB8LVY	1.08153	3.16965e-09	2.66344e-07
arahy.AYP5QI	1.0822	0.000193023	0.00563581
arahy.4L4LDY	1.08276	2.82504e-05	0.0010953
arahy.9M498H	1.08311	7.33988e-09	5.83459e-07
arahy.ZX9CFH	1.0838	0.00203414	0.03621
arahy.QI6NWI	1.08517	7.37029e-07	4.18372e-05
arahy.9KBM2K	1.08533	0.00158474	0.0301059
arahy.WPZ9HM	1.08742	1.39185e-12	2.01403e-10
arahy.C1AEG9	1.08806	0.00021656	0.00619175
arahy.5L2UNJ	1.0883	6.22597e-08	4.36445e-06
arahy.HJY3CU	1.08941	3.98987e-06	0.000194647
arahy.8PX07I	1.09045	4.31406e-06	0.000208792
arahy.URES5A	1.09075	4.37409e-09	3.60457e-07
arahy.Y8ZFR1	1.09165	1.9763e-05	0.000795121
arahy.31U2MU	1.09304	0.00118681	0.0241705
arahy.5D64K0	1.09529	6.90811e-05	0.00237238
arahy.K8MVYG	1.09588	0.00249401	0.0421949
arahy.AJPJ4J	1.09748	6.80255e-14	1.19992e-11
arahy.C5IBYI	1.09756	8.38582e-10	7.85012e-08
arahy.EWVD58	1.0993	0.00113888	0.0233616
arahy.RC3SCI	1.09945	5.04076e-06	0.000236977
arahy.HU2RK8	1.10158	2.16566e-15	4.57651e-13
arahy.FS6JVA	1.10372	4.41383e-06	0.000212896
MSTRG.30874	1.1041	0.000502498	0.0123632
arahy.TJC463	1.10654	0.00107101	0.0223779
arahy.NGDM9G	1.10792	0.00290393	0.0469367
MSTRG.12681	1.10927	7.02075e-08	4.87359e-06
arahy.BIE0AI	1.10938	0.000430083	0.0109279
arahy.W5K5V9	1.11015	0.000119012	0.00376037
arahy.KR8KRT	1.11311	0.00192672	0.0346299
arahy.XN5C49	1.11396	4.94992e-08	3.53932e-06
arahy.9Z3VQ4	1.11403	1.47331e-07	9.51454e-06
arahy.P626UD	1.11424	3.20821e-10	3.17746e-08
arahy.9GLC3X	1.11505	0.00163541	0.0306725
arahy.S01ZUK	1.11548	0.00276603	0.0454478
arahy.5V07QU	1.1162	2.61981e-05	0.00102223
arahy.D5PZ9F	1.11647	0.000141097	0.00436133
arahy.88J6KY	1.1193	1.07757e-05	0.000467935
arahy.A2KH1K	1.11959	4.55881e-12	6.11956e-10
arahy.KPLK3V	1.12021	0.000459825	0.0114586
arahy.SMA5HD	1.12097	2.14523e-12	2.95399e-10
arahy.PJ92NG	1.12453	1.43358e-09	1.29377e-07
arahy.S9JULG	1.12578	8.72017e-07	4.90432e-05
arahy.4JL497	1.12699	2.10087e-12	2.90226e-10
arahy.QRU1J0	1.13194	4.07699e-07	2.42388e-05
arahy.RZQZ1K	1.13216	0.000363316	0.00950047
MSTRG.17485	1.1341	1.29439e-11	1.64936e-09
arahy.N9KY97	1.13542	0.000111573	0.00357562
MSTRG.17344	1.13766	0.000405652	0.0104063
arahy.LA4UJ9	1.13878	0.000564989	0.0135085
MSTRG.48465	1.13951	8.76305e-08	5.966e-06
arahy.FX782E	1.14071	4.78099e-13	7.4484e-11
arahy.K8DV01	1.14076	1.18887e-06	6.52304e-05
arahy.G7GDAG	1.14129	0.00011277	0.00361126
arahy.IQ8A0Z	1.1431	0.000506057	0.0124221
arahy.VBG6VY	1.14598	0.000370505	0.00963788
arahy.MS2B16	1.1466	5.45251e-10	5.20696e-08
arahy.YS9MQU	1.14752	0.000129347	0.00403026
MSTRG.17526	1.14808	3.7418e-16	8.87367e-14
arahy.TX3Z3S	1.14991	6.09746e-05	0.00212376
arahy.64ZY3M	1.15178	9.11425e-07	5.10577e-05
arahy.EB8TWM	1.15429	2.2285e-10	2.26496e-08
arahy.G6U1PW	1.15466	0.00244029	0.0415512
arahy.S68QGU	1.15686	2.71051e-05	0.00105473
arahy.UP75CU	1.15822	0.000776996	0.0174658
arahy.AAI19J	1.15851	0.000766646	0.0172878
arahy.90R2HL	1.15856	0.000467577	0.0116183
arahy.BFXG33	1.16149	2.79395e-15	5.87513e-13
arahy.4P7P8S	1.16179	8.86598e-12	1.15738e-09
arahy.FUL9XS	1.16248	2.26021e-07	1.41885e-05
arahy.0U49HS	1.16272	7.36639e-11	8.1253e-09
MSTRG.20144	1.16353	4.74576e-07	2.78272e-05
arahy.IAZ4XM	1.16626	4.20435e-08	3.0214e-06
arahy.72ZBT8	1.16636	1.76294e-19	5.92557e-17
arahy.N3M6GA	1.16781	5.17465e-06	0.00024247
arahy.M1EJI8	1.17062	1.93641e-10	1.99661e-08
arahy.3A3GYI	1.1708	0.000101571	0.00331989
arahy.CT3KKI	1.17104	6.37257e-06	0.000290316
arahy.3CQ5XM	1.17166	4.23869e-06	0.000205377
arahy.IE5KAY	1.17258	0.000468867	0.0116364
arahy.XZ2FU6	1.17279	0.000192663	0.00562915
arahy.61XZVK	1.17311	1.45535e-15	3.15352e-13
MSTRG.17367	1.17327	0.000303086	0.00824592
arahy.M5BF4R	1.17856	5.18928e-16	1.17827e-13
arahy.NX7S1R	1.17892	3.19027e-05	0.00121809
MSTRG.46254	1.17928	6.22244e-05	0.00216125
arahy.23LUWH	1.18057	5.0553e-10	4.84934e-08
arahy.F20QAX	1.18057	5.0553e-10	4.84934e-08
arahy.T6R8KW	1.18085	0.00289478	0.0468244
arahy.ZEI2BD	1.18324	6.06479e-05	0.00211977
arahy.RR76TU	1.18353	1.60082e-07	1.02758e-05
arahy.XU63JK	1.18543	0.000194702	0.00565775
MSTRG.46760	1.18615	0.0015433	0.0295288
arahy.A60648	1.18644	0.00107425	0.0224237
arahy.SC9AU6	1.18998	8.92557e-07	5.01324e-05
arahy.PJC979	1.19002	8.21271e-05	0.00275177
arahy.SE5UPX	1.19348	4.07602e-06	0.000198396
arahy.E0PWE1	1.20013	2.28375e-10	2.31559e-08
MSTRG.25797	1.20112	7.69152e-07	4.34872e-05
arahy.6NE2BQ	1.20256	1.02247e-05	0.000446279
arahy.XGD34M	1.2049	2.49421e-06	0.000128743
arahy.6IF8U5	1.20792	6.15144e-07	3.53414e-05
arahy.EG08JD	1.2098	8.76119e-09	6.91292e-07
arahy.XWH5X4	1.21076	0.000492951	0.0121493
MSTRG.27393	1.21142	1.59424e-09	1.42073e-07
arahy.WHQ58B	1.21465	0.000233583	0.00660329
arahy.Z8FB5F	1.21507	2.13648e-09	1.86122e-07
MSTRG.16461	1.21652	0.00151506	0.0291716
arahy.U2VSD4	1.2169	0.00170359	0.0316042
arahy.SCCY7D	1.2181	4.06826e-05	0.00151537
arahy.QX73S9	1.21954	1.95868e-10	2.0147e-08
arahy.SK3TPA	1.22042	2.77858e-14	5.13459e-12
arahy.NXF1DB	1.22046	8.21998e-05	0.00275205
arahy.SN8RBH	1.22305	3.48992e-17	9.25305e-15
arahy.PVCU19	1.22328	1.85626e-05	0.000751074
arahy.57BZA4	1.22415	0.00208367	0.0368764
arahy.BS9BQ3	1.22427	0.0001777	0.00527503
arahy.VZ3VQN	1.2263	1.08127e-07	7.24586e-06
arahy.H47S4B	1.2266	5.13673e-06	0.000240958
arahy.LKT9PL	1.2296	1.01318e-08	7.93571e-07
MSTRG.19796	1.23343	9.03948e-05	0.00300053
arahy.X6E8D2	1.23396	0.00166385	0.0310966
arahy.RUW1QS	1.23476	0.00121422	0.0245879
arahy.ABWE2S	1.2357	3.74242e-06	0.000183835
arahy.34AD6Z	1.2361	1.71885e-06	9.17158e-05
MSTRG.4734	1.2395	0.000934826	0.0201713
arahy.DL173G	1.23997	0.000329047	0.0087999
arahy.8T8XTL	1.24071	3.60191e-13	5.71578e-11
arahy.VYCB27	1.24087	1.56319e-09	1.39891e-07
arahy.CY3ZTL	1.2416	0.000534222	0.0129357
arahy.VGH12L	1.24269	1.1971e-07	7.89806e-06
arahy.X43XEU	1.24497	4.83509e-05	0.00175846
MSTRG.8882	1.24711	3.38183e-08	2.46769e-06
arahy.W5G5TD	1.24779	2.58001e-08	1.91536e-06
arahy.6NL4FR	1.24852	5.68264e-13	8.72571e-11
MSTRG.17415	1.24856	5.04485e-11	5.74265e-09
arahy.1L9YJM	1.24876	0.00267281	0.0444465
arahy.XP1WSF	1.24985	1.28736e-18	4.13185e-16
arahy.W8H4W4	1.24994	2.5324e-10	2.54955e-08
arahy.WCR287	1.25042	1.57875e-08	1.20343e-06
arahy.UCH6AW	1.25054	0.000149865	0.00456757
arahy.F8T38Z	1.25084	3.34019e-05	0.00126515
arahy.BI3DJP	1.25244	0.000200066	0.00578999
arahy.IQ39GT	1.25352	0.000495227	0.0121984
arahy.RRD2QF	1.25382	1.66398e-07	1.06492e-05
arahy.82IR2S	1.25601	0.000161551	0.00485301
arahy.V0MKZ1	1.25773	0.00061739	0.0144964
arahy.47GAY4	1.25862	1.97947e-15	4.20385e-13
arahy.77RLVP	1.25939	2.87215e-07	1.75399e-05
arahy.V9MVEL	1.25944	1.12352e-06	6.19633e-05
arahy.14BHD7	1.26068	1.82068e-06	9.65457e-05
arahy.37Y0UC	1.26341	7.46987e-07	4.23461e-05
arahy.V3QVP0	1.26476	1.26072e-22	6.33132e-20
arahy.5JB048	1.26579	2.45345e-11	3.02689e-09
arahy.K5PPYT	1.27031	0.000182677	0.00539649
arahy.Z02ZAB	1.27201	4.04139e-09	3.33684e-07
arahy.UWNN8R	1.27513	3.13256e-09	2.64236e-07
arahy.A5NKXK	1.27761	0.000559413	0.0134155
arahy.E0EAR0	1.27854	2.05251e-06	0.000107636
arahy.B9A4XU	1.27872	0.000548726	0.0131963
arahy.HFV7XQ	1.27885	1.64512e-08	1.24734e-06
arahy.EBSD6D	1.27971	6.49434e-08	4.53721e-06
arahy.GKC2FH	1.28213	0.000268988	0.00746089
arahy.B36403	1.28226	9.37124e-06	0.000411977
arahy.KI5RS7	1.2824	3.04664e-07	1.84209e-05
MSTRG.17349	1.28396	1.96753e-12	2.73576e-10
MSTRG.17520	1.28563	5.02086e-06	0.000236302
arahy.AP71S7	1.28781	1.12837e-05	0.000486041
arahy.8D19I7	1.28992	0.000114164	0.00363952
arahy.U1WPAQ	1.29161	0.000202647	0.00584932
arahy.26YYGP	1.29218	0.000244153	0.0068612
arahy.T3CFRI	1.29334	1.4625e-05	0.00061086
arahy.94Z1HY	1.29705	1.4855e-14	2.85637e-12
arahy.53KNFG	1.29714	3.11195e-15	6.48e-13
arahy.NMQ392	1.29901	0.00135964	0.0268163
MSTRG.25754	1.30041	0.00153935	0.0294664
arahy.M9SN56	1.30104	8.32732e-10	7.81249e-08
arahy.P44SU2	1.30231	0.00122661	0.0247684
arahy.EUL28C	1.30628	0.00280216	0.0458123
arahy.DYP0WQ	1.30676	0.00131361	0.0261418
arahy.438KDZ	1.30945	6.42944e-21	2.54124e-18
arahy.D77ZR6	1.31181	0.000871092	0.0190885
MSTRG.38123	1.31725	5.70021e-08	4.03524e-06
arahy.9GB5B2	1.32085	2.93072e-09	2.4773e-07
arahy.H7T4NQ	1.32161	3.36195e-10	3.32203e-08
arahy.T11RB0	1.32285	3.60401e-12	4.86849e-10
arahy.60DV95	1.32579	8.52654e-12	1.11992e-09
MSTRG.26131	1.32962	0.00166845	0.0311553
MSTRG.28389	1.33041	3.17473e-11	3.87199e-09
arahy.86STVP	1.33508	1.20718e-11	1.54284e-09
MSTRG.8413	1.33659	6.94739e-07	3.95418e-05
arahy.GNTR4L	1.3386	0.00150602	0.0290368
arahy.ISNY9U	1.33868	8.59762e-16	1.93161e-13
MSTRG.21481	1.33985	0.00134901	0.0266352
arahy.X0V17W	1.34182	2.27643e-18	7.093e-16
arahy.6KSX8P	1.34634	7.97316e-05	0.00269052
arahy.4V1EUD	1.34766	3.7731e-11	4.48642e-09
arahy.R7H8KB	1.3482	4.96402e-06	0.000234293
arahy.1W5D66	1.34991	1.75777e-06	9.36755e-05
arahy.SJTD5W	1.35412	0.00137637	0.0270626
arahy.8T23IY	1.35423	0.000289144	0.00793231
MSTRG.30768	1.35433	0.000306428	0.00832623
MSTRG.45236	1.35626	3.09038e-05	0.00118419
arahy.08SQ5V	1.35687	8.78931e-11	9.52257e-09
MSTRG.8395	1.35755	0.000837304	0.0184904
MSTRG.2028	1.35823	4.48111e-07	2.64938e-05
arahy.CCG5WH	1.35902	4.5147e-24	2.75313e-21
arahy.42SP3V	1.36257	2.30377e-07	1.44195e-05
arahy.KCEG0N	1.3649	9.81772e-07	5.44979e-05
arahy.SCIJ9T	1.36526	0.000646064	0.0150427
arahy.76FTKD	1.36551	4.15845e-05	0.00154224
arahy.RJ93MJ	1.36567	1.48822e-11	1.88509e-09
arahy.WAM2FY	1.36655	1.75053e-14	3.32761e-12
arahy.R30FAJ	1.36753	7.24385e-27	5.72626e-24
arahy.3LM8QV	1.36818	2.04095e-06	0.000107293
arahy.C5MC3X	1.36912	0.000503012	0.0123687
arahy.J79AGK	1.37251	9.88302e-10	9.09217e-08
arahy.U8DGBN	1.37799	0.00028898	0.00793231
MSTRG.24577	1.37954	0.000911143	0.0198039
arahy.P6N0JB	1.38167	0.000292277	0.00799259
arahy.G691ZN	1.38282	0.000512855	0.0125529
arahy.5J98P8	1.38759	0.00068225	0.0157083
arahy.1U2NYC	1.38863	4.6431e-06	0.0002217
arahy.J5JSS9	1.38965	1.84843e-06	9.77746e-05
arahy.MTEL0D	1.39063	8.95849e-10	8.3314e-08
arahy.6CD4KH	1.39064	5.82066e-09	4.69691e-07
arahy.2795IL	1.39659	0.00255437	0.0429117
arahy.TGNN96	1.39825	2.05873e-08	1.54993e-06
arahy.JIS6TX	1.40063	1.41542e-08	1.09062e-06
arahy.JWB9EG	1.40409	8.64489e-14	1.49403e-11
arahy.5UX7QI	1.40411	0.000947535	0.0203663
arahy.34LCL9	1.4049	0.000952402	0.0204503
arahy.ELW4ST	1.40583	1.87011e-08	1.41291e-06
MSTRG.36610	1.40599	2.76282e-06	0.000140568
arahy.02UTLC	1.40642	0.000118865	0.00375852
arahy.H6P3X0	1.41587	8.86549e-12	1.15738e-09
arahy.XF2TBK	1.42131	0.000367833	0.0095859
arahy.MVBZ07	1.42614	3.44091e-08	2.50652e-06
arahy.6H2Q4Q	1.42999	1.42396e-12	2.03975e-10
arahy.W7ULQG	1.43004	5.28638e-07	3.06603e-05
arahy.FB42RH	1.43193	1.56185e-12	2.20764e-10
arahy.Q9TM1C	1.43857	1.64683e-05	0.000674
MSTRG.1682	1.43928	3.36424e-08	2.46751e-06
arahy.8X298I	1.44592	0.000207489	0.00596437
arahy.B29LWX	1.45533	9.27798e-05	0.0030654
MSTRG.38547	1.4554	0.00302333	0.0485176
MSTRG.17484	1.45724	1.12799e-15	2.49485e-13
arahy.LEA2MW	1.46034	1.24013e-12	1.81916e-10
arahy.XI3N3Y	1.46034	1.24013e-12	1.81916e-10
arahy.03I27S	1.46352	0.000430607	0.0109283
arahy.LV3APC	1.46496	6.05786e-05	0.00211964
arahy.3WA2G9	1.46522	0.00279532	0.0457706
MSTRG.20700	1.4683	2.08204e-07	1.31279e-05
arahy.M43JJC	1.46899	1.60618e-06	8.62429e-05
arahy.QD4C18	1.47705	0.00101998	0.0216036
MSTRG.19797	1.47867	0.000149018	0.00455017
MSTRG.11911	1.47999	0.00186277	0.0337647
arahy.U768BP	1.48308	1.97004e-17	5.42549e-15
arahy.BW5VY7	1.48321	8.70585e-08	5.93653e-06
arahy.ZXD8B5	1.48321	8.70585e-08	5.93653e-06
arahy.3U3G48	1.48428	2.82144e-06	0.000143209
arahy.J633C6	1.48487	0.00178824	0.0327616
arahy.4335NN	1.48543	3.94764e-05	0.00147818
arahy.W16IV2	1.48786	0.000160817	0.00484459
arahy.0FHV4T	1.48823	1.10542e-05	0.000478085
MSTRG.34897	1.49125	0.000289714	0.00793774
arahy.D11Z9R	1.49695	3.37569e-08	2.46769e-06
arahy.V06MIL	1.49827	4.19619e-08	3.02062e-06
arahy.TNW0AK	1.50447	4.6366e-07	2.72245e-05
arahy.8VCQ03	1.50719	0.00133097	0.0263765
arahy.VFS8MG	1.50746	6.10535e-13	9.30782e-11
MSTRG.3738	1.51107	0.000768346	0.017317
arahy.HS5IHJ	1.51234	1.41242e-12	2.03688e-10
arahy.IG8MW5	1.51367	4.49214e-21	1.79211e-18
arahy.Y5C6DK	1.51832	6.46092e-09	5.15509e-07
arahy.GQ96QH	1.5263	1.50499e-09	1.34966e-07
arahy.ECZ3V7	1.52862	8.08244e-11	8.84654e-09
arahy.9H8X3G	1.53031	3.01985e-07	1.82995e-05
arahy.VNR2QD	1.53031	3.01985e-07	1.82995e-05
arahy.RDRH1W	1.53105	4.63831e-41	7.61521e-38
arahy.624Z3W	1.53451	9.70311e-10	8.94593e-08
arahy.A4T9L9	1.53461	8.09815e-13	1.20869e-10
arahy.BGN7K5	1.54848	1.82758e-16	4.45794e-14
arahy.44B081	1.55031	2.85356e-10	2.83939e-08
arahy.U7B6MW	1.55285	0.00116785	0.0238298
arahy.T0XMQ2	1.55698	1.32793e-07	8.68074e-06
MSTRG.35009	1.57054	0.000485085	0.0119762
arahy.5S4EZI	1.58202	1.7539e-12	2.44669e-10
arahy.Z7PGHH	1.59672	2.75053e-07	1.68861e-05
arahy.7GZ1C0	1.60108	4.17979e-05	0.00154747
arahy.VJD5NB	1.60294	6.77245e-07	3.86492e-05
arahy.64EDPK	1.60537	3.4974e-06	0.000174408
arahy.W40KSR	1.61029	0.00104062	0.0219363
arahy.II6FYR	1.61334	0.000710732	0.0162328
MSTRG.8559	1.61629	1.59096e-10	1.67275e-08
arahy.1J3CUB	1.61848	0.000212872	0.00609858
arahy.V14B4E	1.61881	9.78124e-05	0.00321921
MSTRG.554	1.62262	1.13678e-06	6.2614e-05
arahy.31QCP5	1.62642	2.99533e-05	0.00115399
arahy.WK1M58	1.62827	4.98857e-17	1.30642e-14
arahy.10HX0B	1.64095	0.00127676	0.0256114
arahy.I36EUT	1.64253	5.17824e-15	1.0476e-12
arahy.TG1GNU	1.64404	3.66811e-05	0.001382
arahy.CW0S7X	1.64698	2.03624e-09	1.77752e-07
arahy.N8FFWE	1.65476	0.000627539	0.0146702
arahy.XAZ80N	1.65897	6.52083e-10	6.17195e-08
arahy.35X8AA	1.66243	6.71943e-13	1.01714e-10
arahy.3W912Y	1.6739	3.71916e-07	2.22664e-05
arahy.R4XPT2	1.68294	3.11621e-08	2.29744e-06
arahy.RGBH4Y	1.69316	0.00152951	0.0293571
arahy.31BJ59	1.69515	2.08865e-06	0.000109129
arahy.HXMH4K	1.69642	0.00107525	0.0224317
arahy.PK3IA3	1.69693	6.03321e-06	0.00027633
arahy.00KTF5	1.6991	4.08975e-05	0.00152205
MSTRG.9227	1.70083	0.0029433	0.0474294
arahy.58ZGJB	1.71527	7.60085e-06	0.000341894
arahy.15NCRR	1.7172	2.29516e-10	2.32164e-08
arahy.030G1Q	1.71764	0.000108621	0.00350735
arahy.NBHN08	1.71824	1.87966e-11	2.35991e-09
arahy.RSW943	1.74601	0.00182342	0.0332065
arahy.2K180M	1.74813	0.00222042	0.038782
arahy.52MV3Q	1.75103	8.39968e-06	0.00037272
arahy.XK2NFV	1.75216	1.4273e-15	3.10853e-13
arahy.XSVY15	1.76081	5.62107e-07	3.25131e-05
arahy.39SX4M	1.76167	0.00262338	0.0437097
arahy.S84NMB	1.76553	0.000705564	0.016132
arahy.08JA7Z	1.77205	1.72953e-12	2.42061e-10
arahy.349KCY	1.77687	6.7814e-05	0.0023345
arahy.XPP88F	1.78636	0.00128151	0.0256826
MSTRG.27223	1.78836	3.46626e-08	2.52069e-06
arahy.RW8FUD	1.805	2.56688e-08	1.90893e-06
arahy.W4SF8H	1.80811	5.95301e-13	9.10811e-11
arahy.BU858T	1.80929	4.54993e-07	2.68264e-05
arahy.GJEV7L	1.81746	0.000833081	0.0184193
MSTRG.4624	1.83007	0.000506047	0.0124221
arahy.JPXG8L	1.83126	5.96817e-05	0.00209337
arahy.EUG4LP	1.83596	6.05638e-06	0.000276797
arahy.UAR2GI	1.84238	4.902e-06	0.000231987
arahy.MY48C3	1.87947	0.0010573	0.0221784
arahy.RJG5DC	1.88001	3.24145e-09	2.71309e-07
arahy.19AV4Q	1.89133	5.04285e-14	9.04471e-12
MSTRG.18380	1.89224	0.000146682	0.00449669
arahy.M0LQP7	1.89862	0.000807074	0.017981
arahy.KZM1SZ	1.90727	0.000924688	0.0200163
arahy.RL39CN	1.90727	0.000924688	0.0200163
MSTRG.49651	1.90891	0.00025855	0.00721828
arahy.ISVC9H	1.91203	1.76258e-05	0.000717932
arahy.KWD7UL	1.91394	1.6111e-17	4.52454e-15
MSTRG.17911	1.9154	0.00012315	0.00386252
arahy.AN5TC9	1.91953	2.26318e-09	1.95168e-07
arahy.1PW3KD	1.94435	1.66951e-10	1.74673e-08
arahy.VDG15V	1.96421	7.66428e-13	1.15127e-10
arahy.FVP67A	1.96782	2.2745e-06	0.00011783
arahy.ZW203D	1.96925	1.50836e-05	0.000626946
arahy.EH049N	1.97411	8.89089e-11	9.60824e-09
arahy.ZP68QF	2.0094	4.44712e-06	0.00021426
arahy.JLXU2D	2.02901	1.13296e-07	7.54488e-06
arahy.HESX93	2.03174	0.000211961	0.00607654
arahy.H7KX2Z	2.03478	4.38986e-11	5.11994e-09
arahy.MBA6PB	2.04064	1.57847e-09	1.40963e-07
arahy.VX11NR	2.04681	1.85857e-10	1.92099e-08
arahy.A3CFJS	2.04707	3.41635e-26	2.51438e-23
arahy.D6JZRQ	2.05112	5.58639e-13	8.60888e-11
arahy.PA8IL5	2.05982	0.000606423	0.0143098
arahy.08LC4Y	2.07923	0.00294651	0.0474633
MSTRG.9979	2.09331	4.6646e-05	0.00170478
arahy.MDM0VH	2.10105	6.23736e-22	2.71688e-19
arahy.2M7K4U	2.11437	1.2935e-05	0.000549409
arahy.S5HWQ6	2.13666	0.00251147	0.0423409
MSTRG.721	2.15265	0.00271601	0.0448852
arahy.SQ507X	2.15466	0.000331099	0.00883903
arahy.AF7BT4	2.17965	0.000431185	0.0109346
arahy.1VD7QP	2.18673	1.80507e-06	9.58369e-05
arahy.381GIR	2.19535	2.77987e-05	0.00107975
arahy.D83SSP	2.20801	5.8648e-09	4.7236e-07
arahy.8AIE61	2.21681	0.000959486	0.0205507
arahy.TJB1NB	2.25939	0.000246311	0.0069173
arahy.Q414C2	2.2691	0.000268853	0.00746089
arahy.RKN80Q	2.2691	0.000268853	0.00746089
arahy.N0K0I2	2.32193	8.74974e-06	0.000386646
arahy.HVVY76	2.32889	2.07114e-12	2.87048e-10
arahy.DB9XMS	2.33133	0.000371783	0.00966522
arahy.E7ZXJI	2.34169	0.000829255	0.0183792
arahy.SA3GIM	2.35344	1.89088e-05	0.000763635
arahy.48I8DT	2.35423	7.77605e-05	0.00262816
arahy.9KT8MP	2.40176	5.24128e-06	0.000244519
arahy.EF4K39	2.41028	0.000615655	0.0144737
MSTRG.45279	2.42206	0.000381708	0.00989477
arahy.42JSD4	2.42799	0.000721508	0.0164437
arahy.VY5ZYI	2.44776	4.14389e-05	0.00153952
arahy.ZA2U1L	2.45066	0.000923469	0.0200163
arahy.5EI0AV	2.45545	4.87799e-09	3.99667e-07
arahy.JMB3VF	2.48239	1.41095e-05	0.00059106
arahy.LX0UPC	2.52466	3.17818e-05	0.00121457
MSTRG.47592	2.55459	6.35696e-09	5.08164e-07
MSTRG.18259	2.57225	0.000460882	0.0114782
MSTRG.34261	2.577	5.38431e-27	4.42e-24
MSTRG.3372	2.58496	0.0019785	0.0353516
arahy.4WKR5S	2.58933	1.31053e-05	0.000555536
arahy.RR24AQ	2.59163	1.12156e-07	7.48061e-06
arahy.5ZI49M	2.60081	8.11447e-05	0.00272313
arahy.BNMM5E	2.62545	5.32845e-05	0.00191784
arahy.9WG3Z1	2.63227	4.22965e-05	0.00156457
MSTRG.39916	2.66935	2.73161e-06	0.000139312
MSTRG.45170	2.68018	0.000160992	0.00484646
arahy.Z84UIM	2.71049	0.00162515	0.0305742
MSTRG.48527	2.74624	2.55685e-05	0.00100224
arahy.2AJ2PQ	2.78088	7.76496e-15	1.53455e-12
arahy.8YR14Z	2.81263	1.868e-05	0.000755107
arahy.A5SP47	2.81343	2.25098e-14	4.21436e-12
arahy.D4N0FV	2.82059	3.25336e-11	3.94534e-09
arahy.F40DCN	2.82103	1.00474e-07	6.75423e-06
arahy.9C90RH	2.859	7.66029e-08	5.26562e-06
arahy.GMB1MS	2.88205	2.41504e-09	2.06181e-07
arahy.V8ZK3N	2.88753	4.89217e-06	0.000231778
arahy.RM4DFR	2.92892	0.00307407	0.0491471
arahy.MT8FXZ	2.97154	4.91419e-07	2.87359e-05
arahy.4ZS9PZ	3.04836	0.000301051	0.00819577
MSTRG.20997	3.05311	0.000864098	0.0189449
arahy.W027AV	3.06088	2.21651e-05	0.000883437
arahy.61UWXT	3.12029	0.000648959	0.0150883
MSTRG.24656	3.13102	0.000193502	0.00564305
arahy.FENI28	3.1486	0.00192459	0.0346295
arahy.4APY5B	3.17585	2.333e-07	1.45811e-05
arahy.YSVF0U	3.18712	3.77413e-08	2.73525e-06
arahy.H6GXLW	3.21606	7.52514e-11	8.27901e-09
MSTRG.5946	3.22556	3.19852e-09	2.68242e-07
arahy.3R7UBK	3.31504	1.13703e-07	7.56022e-06
arahy.WE2S9U	3.3339	0.00285562	0.046402
arahy.WEZ503	3.46949	0.00026666	0.00741074
MSTRG.48814	3.51177	1.82141e-05	0.000739074
arahy.C34INF	3.56585	1.11188e-05	0.000480394
arahy.45XZWW	3.71882	1.11796e-05	0.000482532
arahy.SZB8BC	3.74664	8.70962e-06	0.000385672
arahy.21V7FE	3.82018	0.000518969	0.0126445
arahy.3CP25B	3.82575	7.71237e-18	2.27047e-15
arahy.GBF1RD	3.94902	0.000893382	0.0195158
MSTRG.22000	3.97269	1.25865e-06	6.87937e-05
arahy.237GY1	4.04439	0.00275584	0.0453503
arahy.21N9MM	4.04669	3.75031e-11	4.47177e-09
arahy.E2AJGQ	4.04669	3.75031e-11	4.47177e-09
arahy.I640G9	4.078	0.000111169	0.00356536
MSTRG.47541	4.22024	7.30928e-08	5.05691e-06
arahy.YUA0Y6	4.25848	7.32689e-05	0.00249811
arahy.RN7II1	4.32193	9.09821e-05	0.00301768
arahy.QC4JPF	4.40504	0.000945084	0.0203238
arahy.3HRB74	4.41181	1.53225e-05	0.000635636
arahy.37DLMD	4.49445	8.68136e-25	5.61487e-22
arahy.I17ZJY	4.65683	4.62627e-15	9.40389e-13
MSTRG.5945	4.67535	4.20768e-07	2.49463e-05
MSTRG.43716	4.92344	1.74312e-09	1.54055e-07
arahy.79NX8T	5.15987	0.000339367	0.00900906
MSTRG.14031	5.38914	0.000190638	0.00558147
MSTRG.8524	5.43105	0.0014314	0.0279389
arahy.A1VJLL	5.62936	0.000112887	0.00361229
arahy.TAR5IY	5.71895	2.05888e-14	3.87169e-12
arahy.WL1L9F	6.03342	3.02271e-05	0.00116244
MSTRG.40996	7.03159	5.40887e-10	5.17687e-08
MSTRG.34334	7.32193	1.11117e-08	8.63978e-07
arahy.72B7PK	7.37464	5.17581e-11	5.86047e-09
arahy.7JU25H	8.16323	0.00108794	0.022577
arahy.J1I9KX	8.56986	0.000115466	0.00366189
arahy.2Y72DQ	8.56986	0.0012959	0.025886
MSTRG.4030	8.90689	0.000977314	0.0208593
arahy.QL918Z	9.38802	9.71081e-07	5.4045e-05
arahy.MCGR2R	9.38802	8.73851e-05	0.00290741
MSTRG.15639	10.1207	0.000189144	0.00554532
MSTRG.8995	10.1378	1.81131e-07	1.15059e-05
MSTRG.8260	10.1716	0.000963508	0.0206058
MSTRG.27853	10.3106	5.50388e-05	0.00197101
MSTRG.14206	10.6318	0.000381934	0.00989477
MSTRG.47766	10.7868	2.50959e-07	1.56064e-05
MSTRG.31745	11.2107	5.99983e-09	4.81419e-07
arahy.B5N2MW	11.2368	3.72215e-10	3.65258e-08
MSTRG.16066	11.2487	2.09814e-08	1.57682e-06
MSTRG.1373	11.2819	5.30864e-09	4.31638e-07
MSTRG.44039	11.3294	1.41947e-09	1.28375e-07
MSTRG.19655	11.4059	1.58798e-08	1.20831e-06
MSTRG.24132	11.8004	7.5373e-09	5.98038e-07
MSTRG.45491	12.1066	4.07979e-11	4.78445e-09
MSTRG.33959	12.4138	5.86728e-11	6.59096e-09
MSTRG.44128	12.4252	1.13025e-16	2.82147e-14

## Sheet: DEGs at stage S2
The differentially expressed genes between WT and spm at three stages
Gene ID	log2FC (spmS2/WTS2)	P-value	FDR
arahy.PSG53D	-15.0736	9.1687e-20	3.05579e-17
MSTRG.16972	-15.0551	5.24517e-19	1.50502e-16
arahy.LEZM1J	-15.0032	1.96782e-16	3.75593e-14
arahy.NG9QQJ	-14.965	2.02939e-23	1.35273e-20
arahy.391TM2	-14.7517	5.28787e-23	3.27297e-20
arahy.C2E8GX	-14.7257	4.04385e-22	2.13668e-19
MSTRG.17125	-14.6272	2.77766e-17	6.30093e-15
arahy.050HUA	-14.6194	1.14937e-25	1.0163e-22
arahy.L75U5K	-14.5107	7.57311e-22	3.86024e-19
arahy.8U9H8D	-14.4816	4.30828e-19	1.26983e-16
arahy.Q9F21C	-14.3111	2.36094e-22	1.3639e-19
arahy.2W8R22	-14.1575	5.60159e-16	9.63095e-14
arahy.0W4FI5	-13.9268	2.37327e-19	7.4512e-17
arahy.FN6QZN	-13.8851	6.47662e-20	2.263e-17
arahy.PYV8LV	-13.8579	3.62289e-20	1.34162e-17
arahy.F5PR0Y	-13.6897	2.892e-21	1.30523e-18
arahy.D859PH	-13.6769	1.02915e-17	2.51921e-15
arahy.LCNF64	-13.5539	3.83029e-18	9.76207e-16
arahy.8AM4UR	-13.4687	9.39752e-17	1.8938e-14
MSTRG.4285	-13.4456	1.06413e-13	1.28428e-11
arahy.NFFY6G	-13.4243	4.94222e-20	1.79943e-17
arahy.HE6EBR	-13.3745	3.29203e-19	9.83681e-17
arahy.7473D5	-13.3695	1.05325e-07	2.98652e-06
arahy.G51JN1	-13.3434	1.13469e-20	4.5521e-18
arahy.90Y0GX	-13.3223	1.3358e-23	9.04314e-21
arahy.S9C4R7	-13.3144	6.80211e-15	1.00243e-12
MSTRG.17178	-13.2906	1.95005e-15	3.09888e-13
arahy.Y0EE8X	-13.2896	4.612e-17	9.74751e-15
arahy.Y5ZCTQ	-13.2408	3.02101e-19	9.21768e-17
arahy.I18LAP	-13.2263	7.88878e-15	1.15472e-12
arahy.501GHP	-13.2127	6.19747e-09	2.54038e-07
arahy.YP8DRN	-13.1871	1.15524e-19	3.76339e-17
arahy.5T510H	-13.1538	3.20147e-17	7.04112e-15
MSTRG.3726	-13.1287	1.44807e-07	3.89692e-06
arahy.4WGD60	-13.1006	3.61105e-16	6.51901e-14
MSTRG.16926	-13.051	1.35492e-12	1.30316e-10
arahy.D2JYDS	-13.0241	3.1243e-18	8.05754e-16
arahy.K57DW9	-13.0102	3.16322e-17	6.99248e-15
arahy.UQJP0C	-12.9955	2.67586e-15	4.18545e-13
arahy.IA3QS0	-12.9884	7.66153e-16	1.29164e-13
arahy.8JC9PH	-12.9784	7.92116e-19	2.2e-16
MSTRG.18825	-12.9397	6.27496e-11	4.13813e-09
arahy.D1PG31	-12.933	1.40709e-12	1.34581e-10
arahy.U4LTZI	-12.9243	5.27561e-16	9.14305e-14
arahy.NQ5KT7	-12.9156	4.48106e-14	5.84792e-12
arahy.SS1ETW	-12.8918	3.72017e-15	5.73608e-13
arahy.6AD899	-12.8816	1.17655e-19	3.8042e-17
arahy.A0EQPQ	-12.8675	2.8157e-15	4.38835e-13
arahy.V55W7Y	-12.8572	1.37481e-21	6.656e-19
arahy.897SEY	-12.852	3.7552e-21	1.64345e-18
arahy.0B7PBW	-12.8211	3.73266e-16	6.68286e-14
arahy.W9SEAP	-12.8191	9.28777e-10	4.70656e-08
arahy.VNIF6J	-12.7475	1.98503e-18	5.18105e-16
arahy.QU8WMY	-12.7461	4.48186e-11	3.02942e-09
arahy.7PY5NM	-12.7257	2.18971e-16	4.14295e-14
arahy.KUDP7J	-12.7099	3.19063e-16	5.85764e-14
arahy.286I7U	-12.7078	8.45089e-12	6.84396e-10
arahy.W4A4ZK	-12.6401	5.5682e-16	9.61169e-14
MSTRG.17183	-12.6303	5.02466e-13	5.36215e-11
arahy.4XHC1Q	-12.5659	2.4147e-14	3.30036e-12
MSTRG.47614	-12.5395	6.7984e-09	2.74259e-07
arahy.A2XG10	-12.4767	1.30639e-15	2.11992e-13
arahy.U3WWWH	-12.4365	7.8336e-11	5.08855e-09
arahy.9XQY3T	-12.4138	2.27794e-11	1.66435e-09
arahy.VUY3N3	-12.4093	2.46707e-22	1.40646e-19
arahy.MYP9FH	-12.3961	4.03843e-14	5.30222e-12
arahy.3CPC1Y	-12.3369	6.81653e-08	2.04246e-06
arahy.YRI3HS	-12.32	4.93906e-10	2.69514e-08
arahy.E884N9	-12.2848	0.00012314	0.00114221
arahy.99J26D	-12.2787	1.03644e-17	2.52281e-15
MSTRG.36219	-12.2752	0.00149697	0.00857701
MSTRG.17235	-12.2722	4.84441e-09	2.05375e-07
arahy.M33Y2K	-12.2477	2.87788e-13	3.16472e-11
arahy.F8T38Z	-12.2338	7.39355e-05	0.00075552
arahy.1X7ZBM	-12.2198	2.228e-14	3.06452e-12
arahy.3IU0NQ	-12.2167	1.96849e-07	5.0767e-06
MSTRG.44676	-12.2076	7.05031e-11	4.60738e-09
arahy.1ZHN64	-12.1631	1.14867e-25	1.0163e-22
arahy.7J6N7U	-12.1538	1.29644e-16	2.55323e-14
arahy.ICGL65	-12.1464	2.84794e-15	4.40688e-13
MSTRG.41716	-12.1442	1.43389e-10	8.81224e-09
arahy.KINP4N	-12.1325	7.97258e-10	4.0879e-08
arahy.A8NRAZ	-12.0258	5.80596e-12	4.88456e-10
arahy.YYC1CT	-11.961	2.06527e-12	1.93266e-10
arahy.774XMB	-11.9492	1.14883e-22	6.81855e-20
arahy.2I4SWN	-11.9366	7.39171e-07	1.58153e-05
arahy.63YJK9	-11.9326	2.8285e-30	3.95323e-27
arahy.9S9EKZ	-11.9081	2.78907e-16	5.18636e-14
MSTRG.17088	-11.9056	2.26388e-08	7.80327e-07
MSTRG.44845	-11.8842	1.11219e-08	4.25686e-07
arahy.H2AKHM	-11.8829	1.09446e-13	1.31721e-11
arahy.T958MW	-11.8791	5.66653e-09	2.34717e-07
arahy.C4UQ0G	-11.8728	1.68572e-39	4.86915e-36
arahy.ZYX0UD	-11.8727	2.14349e-11	1.58213e-09
arahy.1784RG	-11.8416	1.75045e-14	2.47849e-12
arahy.46R0UG	-11.835	1.27517e-10	7.93812e-09
arahy.CPN596	-11.835	4.11991e-08	1.3164e-06
arahy.577H6Y	-11.8244	1.23893e-08	4.6718e-07
arahy.L964KV	-11.8004	1.20619e-14	1.74202e-12
arahy.W8BZZJ	-11.7552	2.4253e-14	3.30444e-12
arahy.T0JWFY	-11.7398	1.45345e-05	0.000195449
arahy.ADUU08	-11.7327	1.30477e-12	1.26469e-10
arahy.YJWL0V	-11.7299	6.81812e-14	8.58746e-12
arahy.2L7SHU	-11.6853	2.38037e-10	1.39559e-08
arahy.9QS057	-11.6591	4.16289e-21	1.80366e-18
arahy.FR9H69	-11.6348	3.71699e-11	2.57673e-09
arahy.4I97V1	-11.6303	4.20433e-12	3.65786e-10
arahy.VUP14P	-11.6289	3.67914e-22	2.01623e-19
arahy.MD79KS	-11.6257	6.22165e-06	9.64801e-05
arahy.NQRV4U	-11.6196	2.81486e-13	3.10329e-11
arahy.29A50M	-11.6012	2.76135e-07	6.81714e-06
arahy.D79Q71	-11.5777	1.4351e-13	1.67147e-11
arahy.F66B8V	-11.573	3.91665e-07	9.22264e-06
arahy.SC2RCC	-11.5395	6.66651e-12	5.47045e-10
MSTRG.30127	-11.515	7.29682e-08	2.16689e-06
arahy.7804KT	-11.5051	2.60246e-11	1.86067e-09
arahy.X7NLR0	-11.4935	2.47128e-07	6.20353e-06
arahy.6PK8GH	-11.4801	3.69506e-14	4.91092e-12
MSTRG.37085	-11.4598	0.00234467	0.0123137
arahy.U9954S	-11.4322	4.96612e-08	1.55243e-06
arahy.L2M2QA	-11.4235	1.58733e-10	9.70018e-09
arahy.DHKF98	-11.4059	2.06099e-11	1.52644e-09
arahy.XP046L	-11.3898	4.37043e-09	1.87855e-07
MSTRG.27392	-11.3826	0.000439478	0.00320992
MSTRG.43211	-11.348	2.51183e-06	4.49339e-05
arahy.XG1GJV	-11.3276	1.71353e-05	0.0002245
arahy.YL00Q2	-11.3087	2.4348e-12	2.23028e-10
arahy.G9B5FS	-11.2973	3.02299e-07	7.37017e-06
arahy.J4CCY6	-11.2858	2.31308e-09	1.07531e-07
MSTRG.49496	-11.2664	1.45088e-05	0.000195224
arahy.JM79CB	-11.2473	1.96133e-20	7.45425e-18
arahy.WTC06L	-11.2228	2.12908e-10	1.26712e-08
arahy.J42BJ7	-11.1964	1.83372e-08	6.50692e-07
MSTRG.17240	-11.1902	1.56182e-08	5.67218e-07
arahy.50YYNM	-11.1758	3.12296e-08	1.03685e-06
arahy.U5T9YL	-11.1695	9.14362e-12	7.29587e-10
arahy.FLE44X	-11.1527	1.3399e-11	1.02932e-09
arahy.61NS0W	-11.1506	1.62765e-09	7.80136e-08
arahy.QCX1RW	-11.1464	4.69732e-10	2.57296e-08
arahy.WU2DYS	-11.1464	3.79332e-08	1.2256e-06
arahy.55FLCK	-11.1162	8.20897e-20	2.77867e-17
arahy.H4AJ7Q	-11.0967	0.00155381	0.00883492
arahy.BX0HUJ	-11.0768	6.12396e-05	0.000648736
arahy.9T2B0R	-11.0701	0.00909694	0.0354749
arahy.75Q1P4	-11.0566	5.24836e-13	5.58712e-11
arahy.V4VRBH	-11.0521	7.29473e-07	1.56156e-05
MSTRG.17130	-11.0385	1.97892e-13	2.21553e-11
arahy.TS21P9	-11.0154	1.80582e-07	4.70196e-06
arahy.1BHK1H	-11.0084	1.0997e-05	0.000155657
arahy.0FQ4XJ	-11.0061	1.52466e-07	4.07773e-06
arahy.H93UBA	-11.0038	1.27496e-05	0.000176205
MSTRG.44321	-10.9991	4.86602e-06	7.87267e-05
MSTRG.17110	-10.9825	3.5742e-06	6.05866e-05
arahy.SB83T1	-10.9801	4.22348e-09	1.81899e-07
arahy.RE1YA1	-10.9801	4.91748e-07	1.12019e-05
arahy.IT7G4I	-10.9754	3.21125e-19	9.66209e-17
arahy.EHU7FT	-10.9435	1.09217e-18	2.96485e-16
arahy.UX4ERZ	-10.8789	1.21721e-18	3.23545e-16
MSTRG.36343	-10.8688	0.0043697	0.020007
arahy.WFP9WJ	-10.8533	0.0004846	0.00347007
arahy.ZUU225	-10.8376	1.20307e-05	0.000167876
arahy.WM4DMJ	-10.8114	7.9281e-25	6.02633e-22
arahy.IWM9CF	-10.8111	9.65588e-06	0.000139967
arahy.4P3DQS	-10.8057	7.38996e-08	2.19005e-06
arahy.QD1C5V	-10.7868	8.84794e-09	3.47872e-07
arahy.B0CFPV	-10.7704	0.00612585	0.026044
arahy.XAZ3P8	-10.751	3.68707e-08	1.19484e-06
arahy.P271UT	-10.72	0.000225351	0.00186686
arahy.MX1HG7	-10.7085	3.46505e-10	1.95622e-08
MSTRG.27402	-10.7085	0.0085262	0.033675
arahy.6DHK77	-10.708	5.87106e-18	1.47893e-15
arahy.FTG0F4	-10.697	0.000118358	0.00110702
MSTRG.39424	-10.6853	0.00163243	0.00919146
arahy.4ZN8UM	-10.6824	2.3571e-10	1.38533e-08
arahy.EZRH7V	-10.6677	1.55833e-06	3.00213e-05
MSTRG.37742	-10.6588	4.58718e-05	0.000510922
arahy.DEFA3T	-10.6499	0.0106373	0.0400556
arahy.G8LUQ6	-10.5953	4.12403e-24	2.92921e-21
arahy.QJLN12	-10.5731	5.15685e-52	2.79289e-48
arahy.8R729R	-10.5507	5.21695e-12	4.45828e-10
arahy.26E61A	-10.5443	1.34594e-05	0.000183845
arahy.5WR99K	-10.5379	1.17474e-07	3.26899e-06
arahy.Y4D5W6	-10.4952	6.02335e-09	2.47603e-07
MSTRG.23833	-10.4478	2.07844e-06	3.82389e-05
arahy.QU8W8M	-10.4443	9.97538e-09	3.87279e-07
arahy.I64K46	-10.4443	7.87749e-07	1.66899e-05
arahy.EV65WI	-10.427	8.64046e-07	1.81115e-05
arahy.C7A6P7	-10.427	0.000108445	0.00103016
MSTRG.26679	-10.4094	6.7506e-09	2.72839e-07
arahy.7GC7Z1	-10.3987	6.33158e-05	0.000666871
arahy.MX5WXF	-10.388	3.34108e-06	5.7217e-05
arahy.3VG3YI	-10.3808	0.000255859	0.002071
arahy.P86FK6	-10.3627	5.51295e-06	8.74623e-05
MSTRG.35526	-10.3627	7.04745e-06	0.000107289
arahy.E9EDNY	-10.3554	0.00119483	0.0071533
arahy.LLG5IK	-10.3504	9.85882e-33	1.70861e-29
arahy.YU9W9A	-10.3294	2.80327e-05	0.000340408
arahy.GY1NN3	-10.3144	6.53285e-05	0.000683858
arahy.WRQP7J	-10.2761	0.00775405	0.0313037
arahy.Q570SP	-10.2328	5.08927e-05	0.000556965
arahy.5QJ4TD	-10.2204	2.49196e-23	1.63589e-20
arahy.2NZ4WG	-10.2167	1.66235e-11	1.25478e-09
MSTRG.13470	-10.2005	0.00537045	0.0235131
arahy.3A01UJ	-10.1964	0.000318103	0.00247175
arahy.XI9RPA	-10.1923	5.5726e-08	1.70632e-06
arahy.204G50	-10.1882	4.66538e-07	1.07178e-05
MSTRG.24492	-10.184	0.00750936	0.0305242
arahy.GST58F	-10.167	1.23437e-16	2.44209e-14
arahy.PB298V	-10.1548	0.00163243	0.00919146
arahy.AT7H7M	-10.1506	3.40547e-07	8.17445e-06
arahy.H1GLBW	-10.1378	0.000145861	0.00131005
arahy.7Z40J1	-10.1357	8.23641e-22	4.14952e-19
arahy.66HKGP	-10.1254	1.61703e-17	3.80767e-15
arahy.N9U68C	-10.1077	4.41666e-05	0.0004946
arahy.RA2IS4	-10.0934	7.19732e-34	1.35582e-30
arahy.NZR7KS	-10.0901	9.88901e-06	0.000142963
arahy.F7HX5D	-10.0897	8.34969e-17	1.6905e-14
arahy.4A371W	-10.0768	0.00475037	0.0213262
arahy.KF8GDN	-10.0544	1.95276e-05	0.000250837
arahy.S0ITFJ	-10.0544	0.011716	0.043187
arahy.Q66BD2	-10.0131	2.29739e-05	0.000287768
arahy.M7PLWR	-10.0038	4.43734e-08	1.40333e-06
arahy.H9G0X7	-10.0038	2.31951e-07	5.85648e-06
arahy.JR24WJ	-9.98014	0.0116449	0.0429945
arahy.S6SHXY	-9.97537	6.5951e-07	1.42908e-05
arahy.W6P66N	-9.9725	1.31034e-16	2.56891e-14
MSTRG.3430	-9.97059	2.8434e-05	0.000343911
arahy.2DN05W	-9.97059	0.0124021	0.0451205
arahy.FF49M1	-9.96578	0.00012863	0.00118278
arahy.IH4GAK	-9.96217	6.25987e-16	1.0678e-13
arahy.JH3E8T	-9.95128	0.000257492	0.0020818
arahy.39HWVH	-9.93664	3.40452e-09	1.50518e-07
arahy.5HMM9E	-9.93172	2.67926e-16	5.00364e-14
arahy.23HYFJ	-9.93152	1.20096e-12	1.18528e-10
arahy.4E2B06	-9.92679	0.000312047	0.0024324
arahy.HNK90J	-9.92523	1.43406e-07	3.86402e-06
MSTRG.36374	-9.92184	2.93871e-05	0.0003528
arahy.KQP37W	-9.90187	3.92509e-05	0.000449543
arahy.YZJ0EY	-9.88671	0.000646554	0.00437093
arahy.441Z8B	-9.88671	0.00605909	0.025854
arahy.I9TRT4	-9.88162	0.00126648	0.00749319
arahy.PQ7T65	-9.87703	5.17209e-16	8.99964e-14
arahy.8WRD93	-9.87139	0.000896622	0.00566934
arahy.38W5QX	-9.87139	0.00399463	0.0186535
arahy.SUKE0C	-9.87036	1.21238e-49	5.83655e-46
arahy.GX4Q6M	-9.86109	0.00017498	0.00152206
arahy.YS5S6S	-9.85478	4.66371e-12	4.03323e-10
arahy.27A6A2	-9.85071	0.00170519	0.00951828
arahy.8ZA7SM	-9.84347	8.66419e-45	3.41267e-41
arahy.E2W35F	-9.81911	4.90726e-06	7.92755e-05
arahy.X7SX3R	-9.81911	3.62241e-05	0.000419975
arahy.ZR5QI2	-9.80735	1.45349e-20	5.67344e-18
arahy.8VD46W	-9.79766	0.00017806	0.00154472
arahy.S065VF	-9.79225	0.00108481	0.00661622
MSTRG.43905	-9.79225	0.00439294	0.0200752
arahy.9HGS1L	-9.78681	1.79243e-06	3.37508e-05
MSTRG.5436	-9.77588	0.00743288	0.0302787
arahy.P8QM2T	-9.77039	5.55665e-05	0.000600232
arahy.4IXQ36	-9.75377	0.00615197	0.0261366
arahy.IZ4D4G	-9.71996	0.00170578	0.00952036
arahy.UN21ID	-9.71996	0.00287916	0.0144164
arahy.NJD0KH	-9.69116	2.16319e-05	0.000273489
arahy.SMG0EF	-9.68533	3.52728e-05	0.000411045
arahy.TVCH94	-9.6736	0.000968672	0.00603967
arahy.20CGAG	-9.65583	4.20843e-06	6.94623e-05
arahy.Z621FR	-9.65344	1.7996e-28	2.16587e-25
arahy.64516H	-9.64985	0.0123217	0.0448963
arahy.QP982P	-9.63783	1.56609e-05	0.000208141
MSTRG.22480	-9.63178	5.07994e-05	0.000556226
arahy.V40EJ3	-9.62571	0.000412921	0.00305457
arahy.71DGVH	-9.59495	7.65764e-05	0.000777919
arahy.B4ZKRH	-9.59495	0.000385649	0.00288335
arahy.V07PF1	-9.59339	1.71567e-14	2.43721e-12
arahy.1DU7LF	-9.58871	1.98202e-07	5.10553e-06
arahy.EBZQ4K	-9.56213	4.02021e-17	8.58048e-15
arahy.BFG4SY	-9.55714	0.00986054	0.037791
arahy.2H67VJ	-9.54432	2.27017e-05	0.000285026
arahy.1MH1B4	-9.54432	4.90504e-05	0.000539667
arahy.D9Q2X2	-9.54432	0.000782091	0.00507878
arahy.9PNN5C	-9.50515	0.00256664	0.0132227
arahy.XBFI6K	-9.47168	0.00889396	0.034848
arahy.85NLUF	-9.46489	1.72749e-06	3.27272e-05
arahy.41UHLG	-9.46489	0.000189891	0.00162629
arahy.8LD30U	-9.46489	0.000522096	0.00368658
arahy.XW2FM5	-9.44501	1.95629e-13	2.19586e-11
arahy.FJ2B1F	-9.44432	2.3324e-05	0.000291647
arahy.FN76PE	-9.44087	1.51979e-12	1.44403e-10
arahy.TW0DHY	-9.41645	0.000167379	0.00146653
arahy.KG9GRY	-9.40939	3.20927e-07	7.7637e-06
arahy.IRD816	-9.40017	3.48277e-14	4.64302e-12
arahy.IVJ6DK	-9.39874	1.69845e-14	2.42867e-12
arahy.IGG4H7	-9.39518	0.00929917	0.0360928
arahy.7R7ZXN	-9.38802	0.000192402	0.00164454
arahy.YMSH9Z	-9.38802	0.0010185	0.00628523
arahy.B8MRUG	-9.37359	0.00359246	0.0171421
arahy.DIB8K4	-9.35462	1.36467e-13	1.59372e-11
arahy.S5LCZ5	-9.33688	0.00220156	0.0117068
arahy.JZF5VE	-9.32942	5.06649e-06	8.13196e-05
arahy.P3QKDQ	-9.29921	6.83733e-05	0.00070905
arahy.1026BX	-9.29385	1.4032e-05	0.000190049
arahy.SY37LP	-9.25267	0.000192156	0.00164309
arahy.4MA6RL	-9.25267	0.00646437	0.027174
arahy.M6TL6K	-9.25267	0.00646437	0.027174
arahy.KKMV3J	-9.24476	0.00658019	0.0275725
arahy.Z1VWTI	-9.23681	3.07614e-05	0.000366859
MSTRG.36106	-9.23681	0.0137459	0.0488653
arahy.VED4RL	-9.22882	0.00501356	0.0222739
arahy.JGMV5U	-9.22078	5.24991e-05	0.000571084
MSTRG.3399	-9.2127	0.000703166	0.00466556
arahy.PDQU0C	-9.2127	0.0062673	0.0265328
arahy.H37XJE	-9.20457	0.000506581	0.00359813
arahy.D7HVAZ	-9.1964	0.00923277	0.0358946
arahy.T7DLBP	-9.17991	5.01324e-06	8.06268e-05
arahy.E5BVVA	-9.17991	1.11409e-05	0.000157228
arahy.566WV4	-9.16323	2.88405e-05	0.000347851
arahy.3CB71M	-9.15482	0.00181256	0.0100118
arahy.T2Z52M	-9.14636	0.000241492	0.00197524
arahy.W5FEYZ	-9.13802	0.000240191	0.00196762
arahy.67PIFF	-9.13785	0.00051245	0.00363149
arahy.48VSFH	-9.12928	0.00725334	0.0297375
arahy.M75BKX	-9.10329	2.33632e-05	0.000291969
arahy.F5C2US	-9.09452	7.68661e-05	0.000780313
arahy.SE6XPK	-9.08564	1.00316e-12	1.01079e-10
arahy.9BP30P	-9.07682	0.000329528	0.00254228
arahy.RY4U98	-9.06788	0.000298787	0.0023469
arahy.Z0KP5S	-9.06788	0.000337521	0.00259241
arahy.K0UY8K	-9.06788	0.00752747	0.0305663
arahy.LCD1IS	-9.04985	0.00210592	0.0112855
arahy.95S5ZX	-9.02237	0.00738954	0.0301277
arahy.6835ZM	-9.01309	2.35704e-06	4.25515e-05
arahy.B5P8GI	-8.98489	6.34037e-05	0.00066758
arahy.TE2GMD	-8.97537	0.0012697	0.0075092
arahy.H7HAX3	-8.96578	0.000984319	0.00611961
arahy.7CH5H3	-8.95613	2.77853e-06	4.91168e-05
arahy.38DL7I	-8.95613	0.00143181	0.00829029
arahy.ITU10B	-8.95613	0.00699354	0.0289048
arahy.733TCI	-8.93701	4.20202e-37	1.07095e-33
arahy.ZDME3V	-8.92679	0.000215951	0.00180429
arahy.8B51UP	-8.92679	1.34202e-10	8.3065e-09
arahy.JYUV9M	-8.91687	0.000447542	0.00325784
arahy.KDG5NW	-8.91687	0.00259111	0.0133158
arahy.NE0GCA	-8.90689	2.00445e-05	0.000256336
arahy.J3SX56	-8.89684	0.00135853	0.00793706
arahy.NS7LJX	-8.88671	0.00421321	0.0194363
arahy.9DM7NS	-8.86625	0.00413123	0.0191417
arahy.NTT2QB	-8.85591	0.00237556	0.0124385
arahy.8965YC	-8.85591	0.0031769	0.0155768
arahy.3VK2QG	-8.84549	5.90459e-06	9.25572e-05
arahy.KKW1YJ	-8.84549	0.00449408	0.0204377
arahy.6BEU00	-8.835	0.000123988	0.00114888
arahy.29VQUK	-8.80735	1.48839e-12	1.4173e-10
arahy.XMBW0J	-8.79961	4.12738e-13	4.48188e-11
arahy.H1W6SU	-8.79225	0.00125392	0.00743415
arahy.E1TY8H	-8.79225	0.00518822	0.0228956
arahy.5BA12T	-8.78136	0.000562656	0.00391366
arahy.W2ULVC	-8.78136	0.000562656	0.00391366
arahy.VYJ22Y	-8.78136	0.000598243	0.00410973
arahy.BU7NMG	-8.78136	0.00520915	0.0229553
arahy.X8RB79	-8.77939	4.73039e-12	4.07963e-10
MSTRG.23799	-8.77039	0.0039183	0.0183712
arahy.YGS75T	-8.76818	1.5301e-12	1.45065e-10
arahy.NV60S8	-8.75933	0.00445401	0.0202944
arahy.ZDHF3I	-8.74819	0.00106679	0.0065299
arahy.VAE62H	-8.74819	0.00331203	0.0160996
arahy.89MG53	-8.74819	0.00341991	0.0164968
arahy.W8QXVR	-8.74034	5.33297e-08	1.64691e-06
arahy.14R6PY	-8.71425	0.00028317	0.00224705
arahy.IH9SIN	-8.70275	0.00165748	0.0093035
arahy.CXK9V5	-8.69116	0.0137775	0.0489534
arahy.VA7IIE	-8.69046	1.33764e-12	1.29366e-10
arahy.TYST3V	-8.67948	0.00663401	0.0277471
arahy.T192ZT	-8.67684	1.3511e-13	1.58214e-11
arahy.K44HFU	-8.6677	0.000406554	0.0030152
arahy.V2AJHY	-8.65714	4.62119e-23	2.90177e-20
arahy.874YMM	-8.65583	0.000147282	0.00131954
arahy.L9FPHH	-8.64386	0.00154465	0.00879895
arahy.JQ2QTV	-8.63178	0.0132026	0.0473218
arahy.VZ1TQJ	-8.61961	0.000146334	0.00131376
arahy.GADS7N	-8.61961	0.00492623	0.0219836
arahy.D29S0W	-8.59495	0.000887139	0.00562439
arahy.A2LJVL	-8.58246	8.61966e-05	0.000857749
arahy.TBP304	-8.58246	0.00280934	0.0141585
arahy.C5IBYI	-8.56758	4.91671e-06	7.93986e-05
arahy.6SHE48	-8.56714	1.06987e-08	4.10941e-07
arahy.Q6Q4B7	-8.55075	2.29061e-12	2.12062e-10
arahy.ZGM5A8	-8.50515	0.00229663	0.012101
arahy.MX0J1Q	-8.49185	0.00588558	0.0252906
arahy.R3ZIXT	-8.47371	2.51491e-12	2.29397e-10
arahy.IFA20P	-8.46489	0.0004079	0.00302259
arahy.12G0NV	-8.45121	0.00358708	0.0171259
arahy.9W6N4W	-8.45121	0.0126066	0.0456771
arahy.W26F3T	-8.44915	4.40252e-15	6.74022e-13
arahy.41W2JL	-8.42347	0.00260683	0.0133711
arahy.FWH2UP	-8.41363	2.25653e-11	1.65274e-09
arahy.8YA0Q1	-8.40939	0.000334631	0.0025734
arahy.14YEDZ	-8.40939	0.00861012	0.03396
arahy.Q3MUFL	-8.38082	0.0122115	0.0445961
arahy.NH9EVC	-8.36632	0.00143533	0.00830174
arahy.49C0TI	-8.36632	0.00545413	0.0238121
arahy.LDXX7Q	-8.35168	0.000124104	0.00114968
arahy.YN37NC	-8.33688	0.00354952	0.0169875
arahy.V2ZUG7	-8.32193	0.00555133	0.0241452
arahy.LBAG06	-8.32193	0.00663401	0.0277471
arahy.E93Z3L	-8.27612	0.000634502	0.00430827
arahy.DXN5ZD	-8.27612	0.00552693	0.024062
arahy.08CHYH	-8.26491	6.02657e-20	2.14027e-17
arahy.HGFM2G	-8.26053	5.2972e-05	0.000575073
arahy.T1QA7S	-8.26053	0.000814128	0.00524985
arahy.B45QV6	-8.26053	0.00734153	0.029994
arahy.CEFU99	-8.24476	0.00381642	0.0179948
arahy.H3QJL0	-8.22882	0.00442859	0.0201996
arahy.V0SD9Z	-8.22882	0.00540467	0.0236412
arahy.U6KDHT	-8.1964	0.0134942	0.0481244
arahy.29JE2Z	-8.17991	0.00168739	0.00943835
arahy.YLB5I5	-8.17991	0.00170901	0.00953344
arahy.IB7BS1	-8.17991	0.0105513	0.0397907
arahy.6NY03D	-8.14636	5.2051e-05	0.000567206
arahy.TMS86M	-8.14636	5.2051e-05	0.000567206
arahy.16J66J	-8.14636	0.00283112	0.014236
arahy.W8TA7R	-8.14636	0.00424629	0.0195598
arahy.CQR159	-8.11316	1.75808e-14	2.48118e-12
arahy.Q0ZVI3	-8.11201	0.0113079	0.0419681
arahy.760SFH	-8.10993	3.30725e-05	0.000389701
arahy.4K1JMV	-8.09452	0.0055573	0.0241642
arahy.86KBF0	-8.07682	4.55504e-06	7.42778e-05
arahy.XYSL2Y	-8.06124	6.57511e-105	1.4244e-100
arahy.W6K2BP	-8.05889	0.0046151	0.0208449
arahy.27E6QC	-8.05819	7.9868e-07	1.68967e-05
arahy.8WX4TX	-8.05024	4.21334e-57	3.04253e-53
arahy.NA36AX	-8.02514	1.99077e-10	1.18807e-08
arahy.D0Q561	-8.02422	1.61211e-36	3.88043e-33
arahy.Y93W5A	-8.02237	0.0130694	0.0469299
arahy.1RH1JA	-8.00375	0.0101615	0.0386439
arahy.ICA228	-8.00375	0.0101615	0.0386439
arahy.1N8WRQ	-7.98641	6.38335e-10	3.38935e-08
arahy.G84CIW	-7.98489	0.00172043	0.00958237
arahy.FN9ER8	-7.98489	0.0104204	0.0393966
arahy.E0NQML	-7.98014	5.05329e-11	3.39448e-09
arahy.SPP5W5	-7.97585	1.32113e-13	1.55123e-11
arahy.RD60QW	-7.96434	9.50083e-13	9.61782e-11
arahy.KP68JR	-7.94642	0.00736238	0.0300593
arahy.GT3Y0M	-7.93221	1.79196e-08	6.38491e-07
arahy.KS1HEQ	-7.92679	0.00884495	0.0346936
arahy.Q5DY7G	-7.90689	0.0084831	0.0335445
arahy.N1IBZF	-7.90689	0.0107675	0.0403883
arahy.8D7DUE	-7.88671	0.00187893	0.0103062
arahy.5LAL7M	-7.88671	0.0029837	0.0148387
arahy.GXR6MB	-7.88671	0.00911462	0.0355294
arahy.FS5FM4	-7.86625	0.000271477	0.00217337
arahy.DKU1F8	-7.82443	0.00883367	0.0346534
arahy.JH2NJV	-7.80305	0.00322664	0.0157682
arahy.UPL2TI	-7.76818	3.71759e-29	4.73741e-26
arahy.D7XM6E	-7.73922	0.00057764	0.00399735
arahy.WW5JWV	-7.73809	4.35688e-07	1.01001e-05
arahy.AJNB5J	-7.73697	0.00289665	0.0144839
arahy.SNC74A	-7.73697	0.00823037	0.0327905
arahy.67ZY63	-7.73697	0.00931129	0.0361302
arahy.FM4779	-7.73516	0.000249196	0.00202721
arahy.6E1MSX	-7.71425	0.000801109	0.00518287
arahy.VFC9DI	-7.7046	5.28721e-13	5.60095e-11
arahy.85QZ10	-7.69116	0.00931523	0.0361423
arahy.BNV3MQ	-7.69116	0.0095221	0.0367507
arahy.VJ6NUA	-7.62466	1.73034e-08	6.20103e-07
arahy.31R89H	-7.61961	0.00737702	0.0300964
arahy.H7AW2T	-7.59743	2.7989e-09	1.26584e-07
arahy.D236HJ	-7.59352	0.00177347	0.00982722
arahy.QUZ9E8	-7.58796	2.36513e-09	1.09598e-07
arahy.PKFN9U	-7.57872	9.59953e-09	3.73692e-07
arahy.HXSC09	-7.5445	3.08992e-06	5.35723e-05
arahy.KRDC8H	-7.54432	0.0015346	0.00875555
arahy.N05MPS	-7.49185	0.000726473	0.00478885
arahy.I255AM	-7.49185	0.00275706	0.0139518
arahy.P33UNN	-7.47411	1.68923e-08	6.08389e-07
arahy.L3DN4L	-7.4665	3.75991e-08	1.21571e-06
arahy.YX4IN3	-7.46489	0.00331346	0.0161035
arahy.8Z1SZG	-7.46489	0.0103102	0.0390753
arahy.HKKE6B	-7.44294	3.88746e-06	6.49564e-05
arahy.L7YHKS	-7.36545	3.95536e-09	1.72756e-07
arahy.QF72F5	-7.36048	7.04144e-07	1.51557e-05
arahy.X9WA5F	-7.34805	1.61158e-07	4.27258e-06
arahy.XJC9R2	-7.32193	0.0116496	0.043001
arahy.SFU112	-7.32193	0.0119197	0.0437592
arahy.7JZ58T	-7.31288	2.01754e-07	5.18778e-06
arahy.X8EVF3	-7.31288	2.01754e-07	5.18778e-06
arahy.HMP3A6	-7.31072	5.40527e-22	2.82162e-19
arahy.T2VPZC	-7.29855	0.000154661	0.00137597
arahy.15VG0N	-7.24031	3.34143e-09	1.48031e-07
arahy.QC7R0Y	-7.22239	8.99101e-07	1.87285e-05
arahy.QV02Z8	-7.18081	1.83213e-05	0.00023781
arahy.G8D5NK	-7.1781	8.39966e-08	2.45415e-06
arahy.TP1YNP	-7.13034	5.25814e-09	2.20115e-07
arahy.4TSV6W	-7.10066	0.00318061	0.0155836
MSTRG.37168	-7.09608	7.02642e-06	0.000107007
arahy.LGK5XY	-7.04658	2.44614e-07	6.15113e-06
arahy.N8QUMN	-7.0236	2.2113e-07	5.60942e-06
arahy.0ICE57	-7.02237	7.21329e-07	1.54609e-05
arahy.B1CQIQ	-6.99435	8.94907e-07	1.86591e-05
arahy.R1XS8N	-6.9629	0.00628526	0.0265817
arahy.CW2GVZ	-6.94837	0.000769014	0.00500812
arahy.AC0A7B	-6.92679	2.67394e-08	9.04401e-07
arahy.FG3B3X	-6.92154	2.07671e-17	4.78603e-15
arahy.RK7RJ4	-6.88183	2.87475e-05	0.000347045
arahy.FRKN6W	-6.87406	3.16868e-09	1.40954e-07
arahy.WVIE7L	-6.86684	2.6876e-06	4.7626e-05
arahy.N934SC	-6.85092	0.00332856	0.016166
arahy.HVL46E	-6.84235	1.95587e-06	3.63381e-05
arahy.5S2FNZ	-6.83326	8.74196e-09	3.44957e-07
arahy.63MW46	-6.79272	0.00113154	0.00684724
arahy.F95VPU	-6.7879	0.000415619	0.00306929
arahy.2Z80QE	-6.76818	1.01109e-05	0.000145395
arahy.38X92K	-6.76818	1.01109e-05	0.000145395
arahy.7R7017	-6.76585	6.8708e-13	7.17328e-11
arahy.ZJER8L	-6.75551	1.25862e-06	2.49005e-05
arahy.0I6I28	-6.73697	0.00846531	0.0334833
arahy.ZYZ79R	-6.73562	1.22541e-127	5.30932e-123
arahy.X181HS	-6.70603	2.48157e-32	4.13535e-29
arahy.K8NQ3M	-6.69488	1.40859e-05	0.000190541
arahy.08SQ5V	-6.68299	2.73931e-05	0.000333669
arahy.END433	-6.67134	4.02427e-13	4.39193e-11
arahy.NFXQ6B	-6.65821	4.59144e-06	7.48151e-05
arahy.YLGK2W	-6.64866	3.0224e-06	5.26756e-05
arahy.FBA9Q8	-6.64241	3.88334e-17	8.37082e-15
arahy.V2FEV8	-6.64241	3.88334e-17	8.37082e-15
arahy.VYY6KX	-6.58256	4.28872e-26	4.22312e-23
arahy.Z1NGKZ	-6.56224	4.44139e-06	7.26158e-05
arahy.6A53IY	-6.558	8.63855e-19	2.38397e-16
arahy.YW8AM8	-6.55459	1.20015e-05	0.000167523
arahy.VDH4YT	-6.54749	4.68597e-06	7.60978e-05
arahy.V67U6Z	-6.54057	2.87052e-09	1.29149e-07
arahy.CVE390	-6.52692	7.44897e-05	0.000760457
arahy.B1AFV9	-6.51322	4.3878e-05	0.000492131
arahy.ZFC6QQ	-6.4614	1.36978e-07	3.73025e-06
arahy.Y26Y18	-6.44973	0.00364663	0.0173548
arahy.9SPN5G	-6.43224	1.09487e-18	2.96485e-16
arahy.4N44WU	-6.41222	2.25051e-07	5.69556e-06
arahy.TVS1RA	-6.38967	5.10283e-09	2.14651e-07
arahy.4L2VPC	-6.3782	1.06029e-06	2.14669e-05
arahy.3Z4R3A	-6.36048	0.000167613	0.0014677
MSTRG.47416	-6.35755	0.00281969	0.0141941
arahy.1M8NR5	-6.35226	2.00043e-05	0.000255898
arahy.YZ06AV	-6.35196	7.03414e-09	2.83242e-07
arahy.JJV6C7	-6.32684	7.13424e-07	1.53326e-05
arahy.21BYTM	-6.30834	0.000142514	0.00128453
arahy.6SU9IG	-6.29002	0.000921829	0.00579934
arahy.VX313A	-6.2817	6.59505e-09	2.67801e-07
arahy.4A1W4F	-6.2817	2.14627e-07	5.46688e-06
arahy.9N9F55	-6.27185	9.81575e-23	5.98996e-20
arahy.R57BTI	-6.26991	8.33768e-11	5.35975e-09
arahy.D84CI6	-6.26679	6.69837e-05	0.00069768
arahy.1CGI2P	-6.26083	0.000281162	0.0022348
arahy.2G66YZ	-6.25613	1.1389e-11	8.89098e-10
arahy.ZN14GH	-6.22882	0.000181419	0.00156852
arahy.H4N6W2	-6.22239	4.07486e-17	8.65448e-15
arahy.8DR635	-6.21974	0.00319388	0.015639
arahy.9E1YVZ	-6.19967	0.000751465	0.00491527
arahy.F1TUFL	-6.19311	5.20893e-08	1.61551e-06
arahy.X5J7Y9	-6.17254	4.42477e-10	2.44828e-08
arahy.S6J9QN	-6.16993	1.16441e-05	0.000163376
arahy.640VZ5	-6.15768	2.04084e-05	0.000260299
arahy.D8JT6M	-6.1375	1.203e-13	1.42801e-11
arahy.CEWT6L	-6.1247	1.11121e-07	3.12429e-06
arahy.WWT7DH	-6.11027	7.74075e-07	1.64343e-05
arahy.U65F6Q	-6.09722	4.97551e-07	1.13044e-05
arahy.TBDY3T	-6.08233	2.76771e-05	0.000336561
arahy.XVX6ST	-6.08148	2.2481e-05	0.000282821
arahy.ZTJ0QN	-6.08057	2.27493e-05	0.000285533
arahy.6BVJ0B	-6.07468	0.000563978	0.00392034
arahy.04DKNA	-6.07435	2.41193e-06	4.34518e-05
arahy.AGD9YF	-6.07435	5.65626e-05	0.000608413
arahy.189H81	-6.06609	0.00036245	0.00274927
arahy.30MQ01	-6.04938	1.67034e-22	9.77987e-20
MSTRG.15951	-6.03953	0.00285337	0.0143237
arahy.P0VRW3	-6.03367	8.52961e-16	1.42688e-13
arahy.753CXU	-6.03122	9.34369e-05	0.000914143
arahy.GDSN7M	-6.00188	2.17201e-08	7.5045e-07
MSTRG.8963	-5.99508	1.87394e-15	2.99603e-13
arahy.56CBQX	-5.98007	4.91308e-11	3.30542e-09
arahy.STU076	-5.97154	4.6802e-05	0.000519297
arahy.5SIA8T	-5.96578	0.00159343	0.00902821
arahy.KV74NT	-5.9649	2.985e-05	0.000357622
arahy.76ZR72	-5.9542	0.00205355	0.0110527
arahy.RKK33X	-5.94753	0.000598101	0.00410941
arahy.Y173KB	-5.93313	4.01097e-27	4.23862e-24
arahy.5S5IIT	-5.9331	1.10219e-07	3.107e-06
arahy.VWV3IQ	-5.93074	4.60832e-05	0.000513013
arahy.S1GD6Q	-5.91648	0.000726502	0.00478885
arahy.QU1D1P	-5.91441	1.55107e-07	4.12797e-06
arahy.AM2AK0	-5.90689	3.54193e-05	0.00041242
arahy.F9ZABX	-5.90689	0.000265739	0.00213612
arahy.C1WSFF	-5.89724	9.42127e-05	0.000920742
arahy.H2X3VG	-5.89482	0.00118779	0.00712296
arahy.6UZK8G	-5.87447	0.00012183	0.0011333
arahy.0BLG9X	-5.87406	1.21825e-10	7.5947e-09
arahy.E4BIS3	-5.8413	0.00115458	0.00695845
arahy.6KVT94	-5.8392	0.000149971	0.00134003
arahy.8L38IN	-5.8392	0.000149971	0.00134003
arahy.W0ETWJ	-5.82655	0.00156327	0.00887823
arahy.FK1L07	-5.82221	2.02933e-06	3.74307e-05
arahy.YE3TWC	-5.81876	2.95043e-06	5.16498e-05
arahy.D8W1EX	-5.80219	0.000543492	0.00380849
arahy.AYAJ7Z	-5.79442	1.63725e-05	0.000216183
arahy.CQ14AB	-5.79442	0.00423898	0.0195344
arahy.KJ0GBN	-5.78136	0.000123131	0.00114221
MSTRG.19848	-5.77746	3.71749e-07	8.80632e-06
arahy.U54SN6	-5.77573	2.14097e-10	1.27245e-08
arahy.8F7PE4	-5.76818	0.00256617	0.0132223
arahy.102RQV	-5.76553	5.59846e-05	0.000603545
arahy.NZNX6H	-5.76377	5.09606e-05	0.000557568
arahy.GM1YIR	-5.74953	0.000344161	0.00263546
arahy.NCQ92W	-5.74701	7.63242e-40	2.36207e-36
arahy.UY9GAA	-5.74595	0.000596556	0.00410074
arahy.4L4LDY	-5.74307	0.00119596	0.00715809
arahy.CPM77E	-5.74264	7.07614e-34	1.35582e-30
arahy.4UE924	-5.73847	0.000365223	0.00276595
arahy.RU7JNP	-5.73032	0.000263551	0.00212247
arahy.KA44CE	-5.71719	7.88084e-10	4.05045e-08
arahy.IWG05K	-5.71425	0.00372123	0.0176439
arahy.VF0DTM	-5.71425	0.00251102	0.0130075
arahy.WAGS40	-5.71425	0.00251102	0.0130075
arahy.5932D5	-5.71063	2.71292e-07	6.72057e-06
arahy.YN8IJ2	-5.70769	1.19021e-24	8.89107e-22
arahy.L7UR79	-5.70044	0.000250446	0.0020347
arahy.HS5S94	-5.70044	0.00087875	0.00557773
arahy.C0ENLW	-5.69532	3.99392e-08	1.28181e-06
arahy.MH7SY7	-5.69488	2.17731e-05	0.000274873
arahy.S7WXQ9	-5.6865	8.66555e-08	2.51982e-06
arahy.C9KM7P	-5.6865	2.21775e-05	0.000279246
arahy.1ZHU8Z	-5.67243	0.00748899	0.0304643
arahy.1MGG3J	-5.66888	0.0001779	0.00154404
MSTRG.14023	-5.6615	7.68526e-07	1.63465e-05
arahy.ZKTD7I	-5.65821	0.00121442	0.00725253
arahy.8T9PUZ	-5.65105	0.000751663	0.00491582
arahy.FBZU85	-5.64715	3.40446e-19	1.01031e-16
arahy.PJ6ZH1	-5.64386	0.00113431	0.00686306
arahy.AELR7S	-5.64386	0.00160474	0.00908512
arahy.FJ610L	-5.63812	1.08863e-06	2.19484e-05
arahy.TG52SH	-5.63227	0.00749853	0.0304952
arahy.XD5HYR	-5.63033	0.000340357	0.00261142
arahy.D7DDVZ	-5.62936	0.000209506	0.00176086
arahy.TD718P	-5.62644	0.000260717	0.00210316
arahy.54ZV2T	-5.61961	0.00304458	0.0150723
arahy.C1QDUR	-5.61839	8.28651e-08	2.42752e-06
arahy.8061QC	-5.61471	1.49666e-05	0.000200203
arahy.MY5506	-5.61471	0.000242207	0.00198002
arahy.HCI8A4	-5.59991	0.000132234	0.00120795
arahy.BQLE9W	-5.59495	0.000930223	0.00584028
arahy.R2LLHR	-5.58871	8.42257e-13	8.6475e-11
arahy.YZZN9M	-5.57932	0.000738831	0.0048524
arahy.ZKH742	-5.56986	0.000302756	0.00237378
arahy.57F5XX	-5.56523	6.06809e-18	1.51972e-15
arahy.322AAU	-5.56478	0.00024708	0.00201302
arahy.BPDU1S	-5.55135	2.97852e-12	2.66633e-10
arahy.IY41ZL	-5.53916	0.00020703	0.0017448
arahy.XE3XSF	-5.52597	5.08852e-08	1.58156e-06
arahy.0B8THM	-5.52541	0.00139837	0.00812335
arahy.T4LF8L	-5.52356	6.05573e-17	1.27367e-14
arahy.XV3ASI	-5.52356	5.23966e-06	8.36782e-05
arahy.3X1084	-5.52356	0.00662548	0.0277274
arahy.G27FXG	-5.51307	0.000759269	0.00495658
arahy.W2PYYJ	-5.51124	1.08012e-09	5.41646e-08
arahy.T87YCG	-5.50779	0.00113495	0.00686497
arahy.Z0WIVC	-5.50731	9.70816e-08	2.78191e-06
arahy.N5DCQN	-5.50603	3.72604e-16	6.68286e-14
arahy.HBWS59	-5.50462	0.000278327	0.00221756
arahy.GS1HJ9	-5.48583	1.07975e-07	3.04772e-06
arahy.28S3F6	-5.47978	0.000522828	0.00368995
arahy.LB653W	-5.47573	0.000170286	0.0014869
arahy.QF2P07	-5.47573	0.00125543	0.00744081
arahy.57GB45	-5.47229	3.52329e-08	1.1495e-06
arahy.EUL28C	-5.46639	1.93364e-06	3.59857e-05
arahy.5I7RSC	-5.46004	0.000763638	0.00497931
arahy.3A6XR1	-5.45943	0.00391017	0.018341
arahy.06CHHF	-5.45474	2.1224e-05	0.000269511
arahy.52QCLV	-5.43741	2.96553e-17	6.61951e-15
arahy.FP3F30	-5.43105	6.59038e-06	0.000101347
arahy.U6FLCS	-5.43105	6.59038e-06	0.000101347
arahy.V9UCIZ	-5.42516	1.50475e-19	4.79384e-17
arahy.K1N414	-5.41629	2.07515e-15	3.25762e-13
arahy.RGXR1X	-5.40372	0.000984588	0.00612041
arahy.RD9PAU	-5.39232	0.00424219	0.019545
arahy.Q6JTSV	-5.38986	2.67502e-06	4.74381e-05
arahy.EYFM1K	-5.36743	1.28947e-05	0.000177813
arahy.TTFN2L	-5.36457	5.74466e-11	3.82333e-09
arahy.6GI2WH	-5.36457	0.00104397	0.0064159
arahy.SY7QJV	-5.36107	7.38803e-06	0.000111728
arahy.XIEE6H	-5.35869	1.16656e-11	9.07426e-10
arahy.E34YE0	-5.34774	0.000121738	0.00113285
arahy.AK92GL	-5.33241	1.34465e-05	0.000183727
arahy.7W33YA	-5.32992	0.000279404	0.00222429
arahy.I209VN	-5.32193	0.00122698	0.00731041
arahy.XMFH5N	-5.32193	7.25459e-05	0.000743776
arahy.9C0JE8	-5.31677	0.000666987	0.00447415
arahy.VZS9XU	-5.30834	0.00121738	0.0072672
arahy.UPN45K	-5.3073	9.12686e-05	0.000898113
arahy.W98IRP	-5.30378	0.00201899	0.0109141
arahy.B2S0ZF	-5.29972	7.21422e-07	1.54609e-05
arahy.M42AW0	-5.29972	7.21422e-07	1.54609e-05
arahy.E5IAKT	-5.29768	6.73127e-05	0.000700398
arahy.9UEQ51	-5.29662	5.17422e-54	3.20262e-50
arahy.XC1M64	-5.288	0.00513596	0.0227183
arahy.ZV0YIE	-5.2854	0.000298159	0.00234404
arahy.7CRM85	-5.2854	0.000665208	0.00446498
arahy.X2213I	-5.28504	1.16209e-07	3.2442e-06
arahy.I1VY18	-5.27959	8.23613e-28	9.39071e-25
arahy.X2IQ10	-5.27146	0.000842091	0.00538926
MSTRG.28295	-5.27053	0.0124607	0.0452773
arahy.EN6SL9	-5.26913	5.26168e-11	3.5181e-09
arahy.W2HKS7	-5.26781	9.36092e-19	2.56697e-16
arahy.W46MDA	-5.26754	0.000206845	0.00174358
arahy.UWN8Y2	-5.26679	2.3999e-05	0.000298623
arahy.GQKS8P	-5.26303	0.00788692	0.0317139
arahy.I77GVJ	-5.24793	0.00495508	0.022085
arahy.5X9SY8	-5.24521	0.00010813	0.00102806
arahy.L2LZ1T	-5.23914	0.00135142	0.00790296
arahy.71E5Q9	-5.23522	0.00481215	0.0215455
arahy.GYR78M	-5.22721	0.000743583	0.00487549
arahy.TS0267	-5.22338	3.99663e-09	1.73787e-07
arahy.6T97B7	-5.21917	0.00976656	0.0375072
arahy.3A0B2Z	-5.20945	0.00162399	0.00915992
arahy.I8IQWM	-5.20332	0.000425733	0.00312891
arahy.PHK9QW	-5.20131	1.00843e-09	5.08048e-08
arahy.04JW1L	-5.18982	2.49574e-12	2.28129e-10
arahy.H1181I	-5.16993	0.000357212	0.00271478
arahy.578PES	-5.16189	1.06242e-05	0.000151171
arahy.KIS5CH	-5.16189	0.00174684	0.009702
arahy.1E9YC8	-5.15208	1.89069e-10	1.1346e-08
MSTRG.39420	-5.1472	0.00203407	0.0109724
arahy.0QE1FA	-5.14568	0.00415297	0.0192177
arahy.RKT5P3	-5.14568	0.00415297	0.0192177
arahy.U2UX9Q	-5.14461	1.86918e-16	3.58344e-14
arahy.4W7PSA	-5.13955	0.00677819	0.0282112
arahy.3RC294	-5.13955	1.1806e-06	2.36049e-05
arahy.ZEH3NP	-5.13955	0.000345171	0.00263947
arahy.Z32ZXD	-5.13835	1.3826e-21	6.656e-19
arahy.19P32S	-5.13771	3.96116e-06	6.5959e-05
arahy.YW4YDB	-5.13686	0.01214	0.04438
arahy.D9BD6W	-5.13542	8.09341e-09	3.21414e-07
arahy.TA57MB	-5.13386	1.08851e-12	1.08919e-10
arahy.JQ1G2Q	-5.13186	0.00116819	0.00702875
arahy.CF8GRF	-5.12928	0.00159851	0.00905459
arahy.E9W950	-5.12928	0.00125663	0.00744507
arahy.E24IL6	-5.11894	1.1979e-06	2.38628e-05
arahy.A7SH93	-5.11894	0.00439131	0.0200725
arahy.YE4ZXC	-5.10962	0.000918313	0.00578694
MSTRG.48308	-5.10908	7.82299e-12	6.34731e-10
arahy.512YGT	-5.10434	0.000591002	0.00407129
arahy.Q2MNTG	-5.10154	0.000181506	0.00156875
arahy.91R8ME	-5.09722	0.00355058	0.0169875
arahy.3HHC30	-5.09351	0.00088981	0.00563637
arahy.VXI9Y2	-5.09351	0.00088981	0.00563637
arahy.2A63GV	-5.09119	4.82196e-05	0.000531741
arahy.2WK1A7	-5.08746	0.000106164	0.0010125
arahy.704E4A	-5.08249	8.98403e-12	7.20835e-10
arahy.BA5IRE	-5.08139	1.43682e-08	5.30266e-07
arahy.06CD8W	-5.08037	3.43235e-06	5.85486e-05
arahy.967MTC	-5.08037	0.000257622	0.00208194
arahy.H3ZTVM	-5.08021	3.69981e-06	6.23499e-05
arahy.H02YA3	-5.07529	8.04843e-05	0.000809645
arahy.BNP26P	-5.07363	1.04759e-23	7.2046e-21
arahy.2F6CI2	-5.07325	6.69871e-05	0.00069768
arahy.DA0PX7	-5.07146	3.2251e-07	7.78895e-06
arahy.ENL36S	-5.06692	4.27898e-06	7.03855e-05
arahy.0ZF8VJ	-5.06369	1.85679e-08	6.57264e-07
arahy.EMP69X	-5.06301	1.05507e-06	2.13712e-05
arahy.GZ11AJ	-5.05653	0.00840863	0.0333139
arahy.RNX0AV	-5.05528	0.00278854	0.0140683
arahy.V89RV5	-5.05274	8.06733e-06	0.000120272
arahy.G0ZPLS	-5.04809	4.18748e-10	2.32902e-08
arahy.5231CT	-5.04439	3.16082e-06	5.47138e-05
arahy.SB4BQ5	-5.04439	0.00120309	0.00719776
arahy.MTQ0B2	-5.04439	0.00448616	0.0204108
arahy.PCV855	-5.03419	8.62056e-08	2.51179e-06
arahy.9FP97J	-5.03177	3.9489e-10	2.20766e-08
arahy.MC457P	-5.02791	0.000302418	0.00237198
arahy.JGC745	-5.0101	0.00582778	0.0250969
arahy.AAFE4G	-5.00562	0.00224302	0.0118763
arahy.4T0CVS	-5.00282	8.82303e-09	3.4784e-07
arahy.1Z8SFE	-5	0.00277683	0.014024
arahy.DAGB12	-5	0.00485016	0.0216978
arahy.I0F9MV	-4.99863	1.50579e-06	2.91517e-05
arahy.XZ7Y08	-4.99774	0.000247673	0.00201747
arahy.GE7JSC	-4.98606	5.26064e-07	1.18158e-05
arahy.P4M8HI	-4.9824	1.02092e-29	1.38229e-26
arahy.HMY8CZ	-4.97728	1.67301e-08	6.03049e-07
arahy.3DZG8W	-4.97728	0.00164785	0.00926262
arahy.32S0SQ	-4.96963	0.000315363	0.00245353
arahy.FYG8ST	-4.96839	5.22971e-07	1.17708e-05
arahy.W2KP9A	-4.96174	6.06116e-08	1.8326e-06
arahy.GLW41G	-4.95807	3.41488e-05	0.000400457
arahy.1YIR2K	-4.9542	0.000295575	0.0023297
arahy.4DFD6I	-4.9542	0.00529562	0.0232607
arahy.N9G1J6	-4.95098	2.74415e-07	6.78243e-06
arahy.IFFV7U	-4.94953	3.0128e-06	5.25516e-05
arahy.2861FR	-4.94902	1.20005e-08	4.55293e-07
arahy.IT7QFA	-4.94334	5.8912e-16	1.00888e-13
arahy.35G0RG	-4.9419	4.70531e-06	7.63832e-05
arahy.WWQ11A	-4.93717	0.000511979	0.00363053
arahy.MD1FPQ	-4.93664	0.00234895	0.0123301
arahy.SFV8KV	-4.92971	0.00163234	0.00919146
arahy.NQ9BEQ	-4.91848	0.0116896	0.0431115
arahy.PT27R6	-4.91427	1.42381e-05	0.000192163
arahy.UCE8LX	-4.90689	0.000505192	0.00359004
arahy.QXM1B7	-4.89753	1.31766e-06	2.59265e-05
arahy.C0RV52	-4.89575	0.00170448	0.00951551
arahy.T6LAIA	-4.89482	2.53086e-07	6.33841e-06
arahy.0QA3UW	-4.89482	0.00469685	0.0211261
arahy.4568JG	-4.89077	1.0029e-06	2.05158e-05
arahy.V5CRDX	-4.89077	0.00515148	0.0227707
arahy.H2EMZS	-4.88716	2.05231e-09	9.66527e-08
arahy.HTD3J8	-4.88613	0.00167773	0.00939533
arahy.F2S2JF	-4.88536	4.87249e-05	0.00053663
MSTRG.19460	-4.88452	0.000196112	0.00166869
arahy.SNDR2D	-4.87816	7.81652e-15	1.14802e-12
arahy.A2Z0UC	-4.87596	1.17451e-09	5.82242e-08
arahy.6F8CQC	-4.87553	2.13154e-05	0.000270434
arahy.BIGY5Q	-4.87447	0.00074458	0.00487981
arahy.4PHV2I	-4.87447	0.0109233	0.0408698
arahy.T45QSM	-4.87213	0.00183631	0.0101161
arahy.VSRR5J	-4.86692	8.82797e-07	1.8451e-05
arahy.GJ802T	-4.86271	3.91661e-12	3.42526e-10
arahy.1SGL6Z	-4.85798	0.0110227	0.0411469
arahy.W9IDLJ	-4.85442	5.38647e-07	1.20672e-05
arahy.MS52HJ	-4.8529	0.00167088	0.00936537
arahy.CKL802	-4.84967	0.00096126	0.00600036
arahy.EVY9MP	-4.84402	0.000238722	0.00195766
arahy.LY2JWZ	-4.84298	7.86076e-05	0.000794086
arahy.W40KSR	-4.84298	0.00331096	0.0160967
arahy.A9VDNP	-4.8413	2.54792e-06	4.55084e-05
MSTRG.11336	-4.8392	0.00451689	0.020514
arahy.UUZ1A7	-4.8365	8.43792e-05	0.000842372
arahy.H7525J	-4.83619	2.82283e-05	0.000342303
arahy.RKC0UA	-4.83289	0.00879122	0.0345172
arahy.FZ18G1	-4.82782	0.00315886	0.0155086
arahy.8138Y0	-4.82725	8.47278e-06	0.000125419
arahy.2D78K0	-4.82443	0.00439794	0.0200884
MSTRG.9188	-4.822	0.0111618	0.04154
MSTRG.9118	-4.81603	1.04282e-06	2.11428e-05
MSTRG.4219	-4.81519	1.86308e-06	3.48841e-05
arahy.X1MFIF	-4.81473	1.1003e-12	1.09592e-10
arahy.783Z8G	-4.8134	0.000387626	0.00289663
arahy.IQ9SDZ	-4.80735	0.013645	0.0485743
arahy.8VXK9L	-4.80516	1.73351e-07	4.53551e-06
arahy.V2AQ6U	-4.80219	0.000369831	0.00279353
arahy.WVP9YI	-4.79922	2.49396e-05	0.00030873
arahy.A5KHVE	-4.79874	0.00220238	0.0117083
arahy.0FHV4T	-4.79442	0.00920203	0.0358144
arahy.B3VI1A	-4.79212	1.51154e-05	0.000201696
arahy.MT3DPF	-4.79134	4.65793e-10	2.55461e-08
arahy.546D2B	-4.7882	3.32462e-05	0.000391428
arahy.T4HC5L	-4.78338	2.62648e-06	4.67814e-05
arahy.PG0L05	-4.78301	1.95906e-19	6.19563e-17
arahy.YAY0HW	-4.78136	0.00567177	0.0245815
arahy.4XBE3K	-4.77635	6.29282e-05	0.000663541
arahy.1W3D05	-4.77484	1.69545e-08	6.10122e-07
arahy.TCR2SD	-4.77479	5.77272e-07	1.27936e-05
arahy.WRP4Q5	-4.77259	0.00271728	0.013794
arahy.XXTB4R	-4.77259	0.00836164	0.033152
arahy.MY5CGZ	-4.77133	3.27921e-06	5.63356e-05
MSTRG.6781	-4.76553	0.00351695	0.0168579
arahy.QTDN4Z	-4.76457	0.00271865	0.0137993
arahy.YEUZ05	-4.76081	0.000383982	0.0028751
arahy.ED65WR	-4.75737	2.40487e-08	8.24335e-07
arahy.S79ATY	-4.75489	0.000347059	0.00264923
arahy.I5RJVP	-4.75489	0.000425459	0.0031281
arahy.7CLK78	-4.75489	0.00596325	0.0255331
arahy.6S9UGS	-4.75489	0.00838967	0.033254
arahy.LYRN80	-4.75035	1.04754e-05	0.000149557
arahy.J0ARNE	-4.74147	0.00929736	0.0360891
arahy.M4B5E0	-4.74106	8.91921e-09	3.50039e-07
arahy.T7YHMF	-4.73952	0.000219424	0.00182784
arahy.Z98NA8	-4.72792	0.00459809	0.0207847
MSTRG.16824	-4.72785	4.43851e-13	4.76009e-11
MSTRG.11626	-4.72458	5.56627e-12	4.71956e-10
arahy.Y7IGXD	-4.71882	0.00532007	0.0233255
arahy.WJTY0M	-4.71786	4.37005e-05	0.000490394
MSTRG.16369	-4.71392	8.42353e-06	0.000124775
arahy.K28R5D	-4.7137	0.0138467	0.0491106
arahy.858FVG	-4.71285	9.1011e-60	7.88647e-56
MSTRG.8821	-4.71049	0.00702788	0.0290146
arahy.1VZ0XU	-4.70044	0.00682782	0.0283606
arahy.MZ802S	-4.70044	0.00547679	0.023887
arahy.TI6HCL	-4.69488	0.00513832	0.0227264
MSTRG.12495	-4.69426	0.00434627	0.0199271
arahy.LJ933N	-4.69415	6.41139e-05	0.000673911
arahy.2S9XG1	-4.69344	2.84562e-15	4.40688e-13
arahy.K88V5Z	-4.69249	1.28998e-08	4.84744e-07
arahy.H8IU2A	-4.67646	0.000118367	0.00110702
arahy.22KFMP	-4.67557	3.13479e-09	1.3959e-07
arahy.NZ2DI5	-4.67535	1.09585e-09	5.48265e-08
arahy.1KN0VJ	-4.66786	5.75485e-06	9.05375e-05
arahy.QNIY5E	-4.66676	0.000515145	0.00364641
arahy.VPW6I2	-4.66534	0.000399441	0.00297006
arahy.ID0B6N	-4.66415	2.80286e-06	4.94259e-05
arahy.FFR6XR	-4.66164	1.85532e-06	3.47689e-05
arahy.F0KDF8	-4.65916	0.000524805	0.00370088
arahy.HPHS27	-4.65647	1.97712e-08	6.94188e-07
arahy.D7034C	-4.65535	0.0129914	0.0467071
arahy.1G5ZRX	-4.65344	0.000831348	0.00533943
arahy.NSN8SG	-4.64715	2.12948e-08	7.38702e-07
MSTRG.5200	-4.64386	1.36077e-05	0.000185228
arahy.DQ6KFY	-4.63835	2.7735e-08	9.34427e-07
arahy.65BX45	-4.63559	0.00527995	0.0232036
arahy.DWY9WF	-4.63278	6.69183e-07	1.44535e-05
arahy.219RE1	-4.63097	0.00162953	0.0091811
arahy.SDSH2P	-4.63097	0.00435727	0.0199669
arahy.T29M2U	-4.62936	0.00882695	0.0346324
arahy.EHH0JV	-4.62644	0.00147944	0.00851054
arahy.Z3R5C5	-4.62547	5.86578e-05	0.000625977
arahy.AGSV49	-4.62334	0.000812087	0.0052398
arahy.HJY3CU	-4.61943	1.98042e-08	6.94781e-07
arahy.IRA02K	-4.61471	0.00301164	0.0149451
arahy.LAL591	-4.61471	0.00831981	0.0330314
arahy.ZFHV8M	-4.60716	7.49262e-10	3.89248e-08
arahy.M043T1	-4.60433	2.78575e-33	5.02909e-30
arahy.7HP585	-4.6028	6.09043e-05	0.000645499
arahy.JFV18T	-4.59991	0.00960341	0.0370052
arahy.76Y6MV	-4.59946	7.59777e-05	0.000773106
arahy.RVN5Z1	-4.59605	0.00265799	0.0135699
arahy.Q892TN	-4.59495	0.000395898	0.00294851
arahy.3Z4TCL	-4.59246	0.00399806	0.0186578
arahy.F5KWPZ	-4.58747	3.64158e-44	1.21368e-40
arahy.71RM0H	-4.58736	0.000949426	0.00593369
arahy.QZ1TNI	-4.58496	0.00730684	0.0298946
arahy.1K6RTV	-4.58496	0.00257284	0.013247
arahy.8P32VS	-4.58376	0.000320731	0.00248771
arahy.82KWKE	-4.58125	1.53866e-16	2.97614e-14
arahy.6ZP27B	-4.57873	8.59011e-06	0.000126982
arahy.J7GT2L	-4.577	5.83718e-07	1.29035e-05
arahy.4RY61R	-4.57285	2.03758e-49	8.82822e-46
arahy.70XC39	-4.57276	2.21869e-09	1.03782e-07
arahy.7J68PP	-4.57253	2.47318e-06	4.4426e-05
arahy.4727LR	-4.56986	0.00060299	0.00413709
arahy.AX22IR	-4.567	3.71985e-07	8.80709e-06
arahy.12B6U4	-4.56333	7.46415e-11	4.85585e-09
arahy.ZPNK8K	-4.56136	1.17179e-21	5.76936e-19
arahy.JSGZ91	-4.55459	0.000843728	0.00539654
arahy.8EP2TM	-4.55459	0.00229594	0.0120988
arahy.XX5QBN	-4.55349	0.00408394	0.0189672
arahy.GR2U56	-4.5504	1.4137e-05	0.000191052
arahy.YP3YKY	-4.54973	1.59602e-09	7.66638e-08
arahy.XPA4BD	-4.54844	0.00274172	0.0138872
arahy.FK4NNE	-4.54844	0.0069251	0.0286821
arahy.06HQ5Q	-4.54432	0.000170479	0.00148828
arahy.47Y2D4	-4.54432	0.00191004	0.0104319
arahy.4SGG8H	-4.54432	0.00191004	0.0104319
arahy.5D5NM3	-4.54432	0.00191004	0.0104319
arahy.AFAP3W	-4.54432	0.00191004	0.0104319
arahy.ZIW1BH	-4.54234	3.54667e-08	1.15626e-06
arahy.VE1P60	-4.54119	0.00462875	0.0208928
arahy.7I5RUK	-4.53605	0.00255876	0.0131949
arahy.KY1FTE	-4.52356	0.00667485	0.0278641
arahy.LR3XS4	-4.52356	0.0118253	0.0435009
arahy.CNM5E0	-4.51658	0.000642739	0.00435328
MSTRG.48977	-4.51646	4.09139e-06	6.77888e-05
arahy.GMF3XI	-4.51006	3.63881e-05	0.000421435
arahy.N12FVU	-4.50956	0.00138565	0.00806611
arahy.RD7HU1	-4.50434	3.86349e-09	1.69426e-07
arahy.H2TG86	-4.49896	0.000193752	0.0016525
arahy.8G1XAU	-4.49528	5.09861e-09	2.14651e-07
arahy.M58F5L	-4.49445	0.000241199	0.00197364
arahy.MJC5Q8	-4.48982	1.57453e-13	1.82406e-11
arahy.NDAY03	-4.48734	9.90242e-20	3.27513e-17
arahy.ZQ3F6U	-4.48727	1.05155e-05	0.000149919
arahy.B1R1KQ	-4.48304	3.51108e-05	0.000409487
arahy.3P4BG6	-4.48113	0.00204714	0.0110278
arahy.PEH6CG	-4.48113	0.0137877	0.048971
arahy.RSS8YY	-4.47687	1.11513e-08	4.26438e-07
arahy.CR4GUX	-4.47573	0.0070524	0.0290674
arahy.99RKF3	-4.47573	0.0141607	0.0499505
arahy.NLBN4J	-4.47283	1.52719e-07	4.07944e-06
arahy.VPDB1U	-4.46792	7.8768e-17	1.61743e-14
arahy.3ZDQ4J	-4.46352	0.000259674	0.00209553
MSTRG.6235	-4.45709	1.29294e-09	6.32272e-08
arahy.051FW7	-4.45578	6.25513e-06	9.68952e-05
arahy.HSJ5V9	-4.45474	0.00262991	0.0134561
arahy.L17MWU	-4.45185	9.60196e-06	0.000139325
arahy.JKC32H	-4.44184	0.000761034	0.00496511
arahy.2DP6C3	-4.43801	4.18652e-05	0.000474097
arahy.WZ5PI0	-4.43626	0.00647646	0.0272142
MSTRG.19577	-4.43449	4.64809e-05	0.000516512
arahy.CCI0LY	-4.43399	0.000306353	0.00239505
arahy.VRRB4A	-4.43325	1.31821e-07	3.61253e-06
arahy.CJC4X3	-4.43105	0.00379198	0.0179083
arahy.SMRD1P	-4.43105	0.00551574	0.0240234
arahy.BD6PFY	-4.43021	1.39754e-05	0.000189578
arahy.FU33AK	-4.42999	0.00075036	0.00491026
arahy.M8SWBU	-4.42884	5.93106e-05	0.000631699
arahy.STSP6P	-4.42884	5.93106e-05	0.000631699
arahy.RFF6WQ	-4.42813	4.53988e-10	2.50572e-08
arahy.D22HAB	-4.42196	0.000223556	0.00185413
arahy.XL84DY	-4.41954	0.00146827	0.00846177
arahy.3XNV5U	-4.41709	0.00263749	0.0134885
arahy.CRLU4M	-4.41238	0.00015872	0.00140373
arahy.03EXEF	-4.40656	2.37729e-08	8.16819e-07
arahy.NKTC04	-4.40624	1.43509e-05	0.000193339
arahy.937JDH	-4.4058	2.04927e-13	2.28836e-11
arahy.59WLWN	-4.40259	1.51485e-05	0.000202017
arahy.040HS9	-4.4023	0.00142518	0.00825516
arahy.VMD6HC	-4.39759	0.00124761	0.00740901
arahy.NCP65V	-4.39559	0.00431453	0.0198109
arahy.D91PU0	-4.39232	8.095e-05	0.000814141
arahy.MMJQ7K	-4.38977	0.00176844	0.00980578
arahy.4M9DN5	-4.38929	0.000387883	0.00289806
arahy.ICU8XT	-4.38893	1.2011e-07	3.32737e-06
arahy.C4XWSY	-4.38802	1.93715e-05	0.000249053
arahy.NZL2UA	-4.38313	2.49529e-07	6.25295e-06
arahy.98P7IJ	-4.38152	1.66812e-21	7.77147e-19
arahy.FW2V6H	-4.37923	3.32566e-07	8.00951e-06
arahy.1EF81S	-4.37842	8.71621e-08	2.53285e-06
arahy.RZ4SVU	-4.37255	9.97891e-11	6.321e-09
arahy.G34P0I	-4.37255	0.00867022	0.0341504
arahy.QZ950J	-4.37077	3.64209e-12	3.21387e-10
arahy.EKFN80	-4.36359	7.49115e-10	3.89248e-08
arahy.F2WGAE	-4.36075	0.0128127	0.0462002
arahy.DV5N5R	-4.36048	0.0043438	0.01992
arahy.U59Q9U	-4.35896	9.15757e-05	0.000900368
arahy.LI7RG4	-4.35755	0.000917369	0.0057822
arahy.PBZG4X	-4.35168	4.92265e-07	1.12019e-05
arahy.6LQ9DQ	-4.34577	8.80296e-05	0.000872298
arahy.R5YE9W	-4.34577	0.000166017	0.00145765
arahy.S6CLIJ	-4.34577	0.000651555	0.00439582
arahy.V4B8PK	-4.34363	0.000702378	0.00466176
arahy.BHNE8U	-4.34341	0.000212485	0.0017821
arahy.8827H6	-4.33937	0.00286968	0.0143822
arahy.TF3LVT	-4.33787	0.0128017	0.0461793
arahy.763IQV	-4.3373	5.37213e-07	1.20413e-05
arahy.72AJJX	-4.33556	4.74617e-15	7.16759e-13
arahy.KPK81W	-4.33362	8.83616e-09	3.47872e-07
arahy.CT9XRW	-4.33131	8.86626e-10	4.50878e-08
arahy.ZRY0WK	-4.33092	0.00609222	0.0259522
arahy.XLF91B	-4.32828	0.000330414	0.0025464
arahy.Y7NYXA	-4.32611	9.84391e-11	6.24461e-09
arahy.9L8CC3	-4.3147	0.000525396	0.00370385
arahy.L0VV9Y	-4.3147	0.0125565	0.0455456
arahy.5IT4PV	-4.31159	0.000158717	0.00140373
arahy.P0WGR4	-4.30986	0.00270464	0.0137395
arahy.RNT4RI	-4.30378	0.00147794	0.00850394
arahy.UM2SQV	-4.30232	7.3169e-19	2.04529e-16
arahy.N8JZ6F	-4.30226	1.54635e-06	2.9817e-05
arahy.D4MEDX	-4.30186	8.57488e-27	8.8458e-24
arahy.L6JIG8	-4.29805	8.83479e-07	1.84564e-05
arahy.J8U28E	-4.29462	0.00315992	0.0155121
arahy.D7I4MC	-4.29278	0.00181193	0.0100096
arahy.XN8K2M	-4.29022	0.000255426	0.00206857
arahy.JE30L8	-4.28824	0.00131661	0.00774221
arahy.X49QW6	-4.27922	0.010013	0.038267
arahy.AYA1A5	-4.27879	1.38015e-12	1.32296e-10
arahy.677K9W	-4.27697	0.000301733	0.00236748
arahy.1VD7QP	-4.2741	0.00211279	0.0113147
arahy.638YZQ	-4.27302	0.000210311	0.00176729
arahy.09736N	-4.27302	0.00544518	0.0237802
arahy.Q1PJAN	-4.27302	0.00162224	0.00915429
arahy.B3G9N7	-4.27053	0.00299267	0.014874
arahy.IBR8Q2	-4.27053	0.00299267	0.014874
MSTRG.34039	-4.26951	0.000748957	0.00490256
arahy.CD5B6Y	-4.26466	6.12722e-10	3.26135e-08
arahy.GM6TB3	-4.2644	1.32088e-08	4.94638e-07
arahy.LRN7UR	-4.26303	1.2416e-05	0.000172586
arahy.X9W7N3	-4.26192	0.00162497	0.00916154
arahy.YS6PIM	-4.2555	0.00252086	0.013046
arahy.UIHU82	-4.25172	0.00101505	0.0062693
arahy.8YLP1I	-4.25024	8.19234e-17	1.66643e-14
arahy.AUV6LD	-4.2469	0.00399727	0.0186567
arahy.QWX0SS	-4.2384	0.000263972	0.00212546
arahy.5G1E1F	-4.23704	6.04024e-05	0.00064112
arahy.IVVW2K	-4.23649	0.00192204	0.0104842
arahy.SLF9ZZ	-4.23522	0.00596062	0.0255267
arahy.V9CB21	-4.23447	0.000699595	0.00464929
arahy.LJEZ0V	-4.23406	0.000212143	0.00177958
arahy.RWK4UY	-4.23266	0.00591295	0.0253729
arahy.C19K2L	-4.22995	0.000449144	0.00326566
arahy.P51MBZ	-4.22995	0.000449144	0.00326566
arahy.27LGD1	-4.22995	0.0020125	0.0108859
arahy.E2TLBW	-4.22882	0.00726352	0.0297623
arahy.H0PYWT	-4.22882	0.00726352	0.0297623
arahy.5H969I	-4.22875	1.01807e-05	0.000146107
arahy.LIG7UX	-4.22856	6.12823e-20	2.15868e-17
arahy.VXL9CA	-4.22497	0.00181501	0.0100228
arahy.ZJ2IZL	-4.22239	0.0131576	0.0472036
arahy.LNQZ69	-4.22209	0.0037101	0.0176046
arahy.YXI3SW	-4.21723	0.000553165	0.00386128
arahy.GFD0T8	-4.21432	0.00206624	0.0111072
arahy.JA012F	-4.21327	5.82865e-05	0.000622935
arahy.0ZFN4L	-4.21316	0.000145667	0.00130859
arahy.EU46CC	-4.20945	0.000836356	0.00536126
arahy.0BZR9P	-4.20864	4.08683e-11	2.79732e-09
arahy.32PDNQ	-4.20864	4.08683e-11	2.79732e-09
arahy.HI90ZC	-4.20801	0.000187513	0.00161061
MSTRG.17167	-4.20729	0.000130708	0.00119678
arahy.JUG0ZV	-4.20511	0.000494462	0.00352593
arahy.4LL9T6	-4.20448	0.0103748	0.0392653
arahy.I8W9P3	-4.20294	9.32983e-05	0.000913315
arahy.26SKGH	-4.19377	0.00228914	0.0120733
arahy.H3WDBY	-4.19338	1.43231e-08	5.29206e-07
arahy.MNPV6T	-4.18133	0.0045675	0.020681
arahy.SE8RA9	-4.17932	0.00250907	0.0130036
arahy.R3IAX4	-4.17834	6.65173e-05	0.000694457
arahy.D0Z1X3	-4.17672	0.00403679	0.0188047
arahy.C52HL3	-4.16993	0.0117292	0.0432283
arahy.3Q2PIU	-4.15987	0.00117601	0.00706893
arahy.5A67KA	-4.15843	5.65249e-06	8.92513e-05
arahy.RX41GD	-4.15554	1.45888e-06	2.83703e-05
arahy.KLDP20	-4.15528	5.25003e-08	1.62477e-06
arahy.5M71YA	-4.15501	0.00587612	0.0252599
arahy.V2YWYI	-4.15381	0.00105271	0.00646134
arahy.AFL9DX	-4.14975	0.000361465	0.00274276
arahy.STDR6Y	-4.14975	5.16661e-10	2.79468e-08
arahy.IQP7TJ	-4.14613	0.0111453	0.0414964
arahy.YFZW08	-4.14296	0.00221267	0.0117543
arahy.Z5DA2B	-4.13465	2.95997e-09	1.32898e-07
arahy.7U4PBQ	-4.12928	0.000707806	0.00468629
arahy.I80HSP	-4.12928	0.00954757	0.0368241
arahy.M05HM0	-4.12928	0.0038253	0.0180308
arahy.HJ7C1Q	-4.12611	0.00656468	0.0275235
arahy.3T0U24	-4.11894	0.00813221	0.0324891
arahy.DE44V3	-4.11894	0.00813221	0.0324891
arahy.Z400B0	-4.11894	0.00813221	0.0324891
arahy.58W7PF	-4.11779	4.29495e-06	7.06214e-05
arahy.U7WVQR	-4.11677	5.91344e-07	1.30321e-05
arahy.56Z1DA	-4.11548	0.012498	0.0453975
arahy.NY8BVK	-4.11422	0.000273579	0.00218697
arahy.32KBNI	-4.11151	0.00501391	0.0222739
arahy.WD2ETH	-4.1093	0.00200184	0.0108363
arahy.7A0A2P	-4.10824	1.15208e-34	2.49581e-31
arahy.S5QGNM	-4.10692	0.000549953	0.00384473
arahy.4EC4CX	-4.10434	3.0642e-06	5.32754e-05
arahy.SZ7SGM	-4.10434	0.000179237	0.0015524
arahy.E5JI7C	-4.10236	2.0293e-06	3.74307e-05
arahy.G8MIGD	-4.09837	0.0102824	0.0389941
arahy.BRB6W9	-4.09686	0.0128884	0.0464378
arahy.0T42SY	-4.09398	0.000120293	0.00112061
arahy.ISKM3Z	-4.08746	0.00779658	0.0314319
arahy.TJ5MNL	-4.08746	0.00909245	0.0354645
arahy.ZQR06K	-4.08648	8.29857e-11	5.34253e-09
arahy.RH6BR7	-4.08616	7.40625e-06	0.000111887
arahy.V8DYZI	-4.08562	4.4816e-11	3.02942e-09
arahy.NIM4HJ	-4.08389	1.72169e-17	3.98907e-15
arahy.8QDS1I	-4.08332	4.05854e-08	1.30159e-06
arahy.IAPX52	-4.08096	5.6661e-09	2.34717e-07
arahy.82P426	-4.07121	0.000243532	0.0019886
arahy.S70B5X	-4.06747	2.35968e-10	1.38533e-08
arahy.HH763L	-4.06667	9.30882e-06	0.000136061
arahy.P85M38	-4.06625	0.0044923	0.0204344
arahy.VES4LD	-4.06528	0.0106599	0.0401271
arahy.UG7HDC	-4.06413	0.00278031	0.0140383
arahy.GW0D9K	-4.05974	0.00055395	0.00386489
arahy.28UQCP	-4.05708	4.61574e-14	5.98761e-12
MSTRG.48995	-4.05553	2.78866e-08	9.38807e-07
arahy.E7SATX	-4.05311	0.000298463	0.00234521
arahy.DWFB4K	-4.05222	4.1532e-08	1.3241e-06
arahy.34CRUF	-4.04916	4.20068e-05	0.000475451
arahy.1RUX3F	-4.04751	0.000763308	0.00497845
arahy.GHXG56	-4.0458	0.000136498	0.00123932
arahy.8PHP50	-4.04561	4.78983e-12	4.11764e-10
arahy.168PWC	-4.04439	0.0099571	0.0380903
arahy.Q1EQ94	-4.04307	3.63031e-07	8.6566e-06
arahy.66BVBV	-4.04201	8.73415e-10	4.46255e-08
arahy.1LQ7FQ	-4.04103	0.00192719	0.0105077
arahy.85MPTE	-4.04075	0.00223235	0.0118328
arahy.QR0DXW	-4.0379	3.45271e-05	0.000404203
arahy.ZRH25X	-4.0378	7.2296e-20	2.46643e-17
arahy.WA7111	-4.03747	8.84352e-06	0.000130416
arahy.HSA1AU	-4.03362	0.0047566	0.0213453
arahy.GB961F	-4.03342	0.00138641	0.00806945
arahy.R9TITG	-4.03342	0.0124599	0.0452773
arahy.V4CI2Q	-4.03185	0.00659535	0.0276253
arahy.N7392N	-4.02685	5.57775e-06	8.82964e-05
arahy.Y5BWXR	-4.02628	2.90951e-06	5.10779e-05
arahy.R73Z8L	-4.02628	0.000372579	0.00281233
arahy.W204M9	-4.02459	0.00090669	0.00572155
arahy.CH7PW0	-4.02407	1.86045e-06	3.48498e-05
arahy.S7URRB	-4.02237	0.000177155	0.00153889
arahy.Z02ZAB	-4.0155	6.68645e-06	0.000102623
arahy.95ENID	-4.01495	0.00798816	0.0320525
arahy.66GL51	-4.01436	0.000193728	0.0016525
arahy.JIRJ73	-4.01381	0.000202439	0.00171243
arahy.SI6M6S	-4.01381	0.000408275	0.00302485
arahy.Z8Y3VF	-4.01249	2.03771e-06	3.75533e-05
arahy.VS3UMP	-4.01167	1.3928e-07	3.78107e-06
arahy.G5P3ND	-4.00974	0.00701446	0.0289774
arahy.P4Y6YZ	-4.00749	0.000874117	0.00554995
arahy.IG8MW5	-4.00088	0.00190377	0.0104095
arahy.LLII7N	-4	0.00189064	0.0103481
arahy.RQ5XX8	-3.99756	1.63631e-25	1.41793e-22
arahy.B2PA1P	-3.99377	2.15591e-06	3.94297e-05
arahy.R9786Y	-3.99277	0.000201788	0.00170826
arahy.S6ID14	-3.98995	0.00736923	0.0300816
arahy.AZ5764	-3.98844	6.96956e-08	2.08112e-06
arahy.WQ1I1V	-3.98621	6.64402e-11	4.355e-09
arahy.TVP250	-3.9855	1.64299e-09	7.85716e-08
arahy.M83GCC	-3.97957	2.25559e-09	1.0531e-07
MSTRG.30275	-3.97124	1.09601e-11	8.63393e-10
arahy.CZ58FI	-3.96963	0.00149759	0.00857831
MSTRG.1900	-3.96707	0.000113131	0.00106859
arahy.IGB0ZL	-3.96578	0.00099115	0.00615413
arahy.3J53SH	-3.96578	0.00346355	0.0166665
arahy.LF2RWL	-3.95877	2.25241e-06	4.09526e-05
arahy.KHZX7Q	-3.9576	0.000234686	0.00192983
arahy.F6GGDR	-3.9571	0.00010112	0.000974477
arahy.FMXP0C	-3.95693	1.78498e-13	2.04597e-11
arahy.3NB7SA	-3.95107	6.98808e-84	7.56932e-80
arahy.HE8J5U	-3.95074	2.37657e-06	4.28504e-05
arahy.L4F40C	-3.94996	2.44296e-05	0.000303198
arahy.VXE2C0	-3.94902	0.00234971	0.0123311
arahy.H83BDD	-3.94753	8.43013e-05	0.000841789
arahy.WV7YAP	-3.94683	1.32522e-06	2.60529e-05
arahy.Q6RF9X	-3.94502	4.24997e-11	2.89526e-09
arahy.HK8QN4	-3.94449	8.16978e-06	0.00012164
arahy.CU0E1J	-3.94342	1.48171e-08	5.43665e-07
arahy.XAYE67	-3.93996	1.15846e-13	1.37892e-11
arahy.K1LFJJ	-3.93985	3.74949e-12	3.29521e-10
arahy.S11XWG	-3.92935	0.000187539	0.00161061
arahy.3C2BWJ	-3.92698	8.57471e-13	8.74156e-11
arahy.VHB05R	-3.92588	0.00691792	0.0286582
arahy.B29LWX	-3.92547	1.65886e-07	4.37984e-06
arahy.IPX7IG	-3.92283	0.00064531	0.00436387
MSTRG.40115	-3.92273	4.51039e-19	1.31156e-16
arahy.IXET8P	-3.92107	0.0122771	0.0447864
arahy.WJY350	-3.91966	0.00397139	0.0185639
arahy.X80IZH	-3.91886	0.00139537	0.00810964
arahy.4D79G7	-3.91427	0.000650957	0.00439315
arahy.XI5WK7	-3.91246	1.15616e-09	5.75121e-08
arahy.M4G7E6	-3.91146	2.66592e-07	6.61549e-06
arahy.6154V7	-3.91059	0.000710124	0.00469805
arahy.5J98P8	-3.90769	2.37246e-16	4.46919e-14
arahy.US5JJQ	-3.90689	0.000206607	0.00174225
arahy.XPQW08	-3.90689	0.00667105	0.0278536
arahy.7YIN0X	-3.90368	1.90304e-07	4.9255e-06
arahy.MQM99M	-3.90199	0.000458453	0.00331886
arahy.408BM2	-3.89651	2.65718e-06	4.71642e-05
arahy.TB6UZQ	-3.89553	0.00171718	0.00957164
arahy.FP407S	-3.89077	0.00570551	0.0246882
arahy.Y3Z7BF	-3.89007	0.00602002	0.0257273
arahy.YM2442	-3.89002	6.48099e-14	8.21058e-12
arahy.4R8EXU	-3.88866	0.000161935	0.00142692
arahy.9W6FMP	-3.88866	0.000161935	0.00142692
arahy.VUE9H8	-3.88536	0.00423147	0.0195039
arahy.Y2BFPY	-3.88264	0.00106645	0.00652903
arahy.8Y4PDX	-3.88217	6.21827e-21	2.66752e-18
arahy.CV66AJ	-3.88158	1.08181e-05	0.000153527
arahy.JT4IXE	-3.88042	8.85133e-05	0.000875574
arahy.ZLNV7B	-3.87983	1.58041e-05	0.000209787
arahy.1VP9U3	-3.87915	0.000429328	0.00314959
arahy.R8L9DA	-3.87804	3.68717e-07	8.74885e-06
arahy.EPH7QX	-3.87596	6.44685e-09	2.62768e-07
arahy.J8Q3D1	-3.87558	5.03833e-08	1.5716e-06
arahy.FKL2A7	-3.87447	0.00685786	0.0284608
arahy.KD1TI7	-3.87298	0.000206542	0.00174204
arahy.57ZBEA	-3.86673	0.000666763	0.00447415
arahy.DAH46G	-3.86625	0.00081998	0.00527659
arahy.6I1EAT	-3.86542	4.46321e-07	1.033e-05
arahy.J04VDZ	-3.8609	7.2885e-08	2.16689e-06
arahy.W8BY14	-3.8609	7.2885e-08	2.16689e-06
arahy.L78ELK	-3.86028	6.5578e-94	9.471e-90
arahy.MV6CSW	-3.85798	8.06956e-06	0.000120272
arahy.793UIY	-3.85505	0.00668369	0.0278929
arahy.EN7GHH	-3.85415	0.00123899	0.0073708
arahy.H7UR3I	-3.85405	1.76372e-08	6.29462e-07
arahy.3STG0N	-3.85244	0.000200943	0.00170343
arahy.K7T5R5	-3.85244	0.00115719	0.00697127
arahy.PLG8VX	-3.85224	0.0103851	0.0392893
arahy.4DPV3H	-3.85207	1.75624e-06	3.31559e-05
arahy.XXR9N9	-3.85175	0.000417039	0.00307715
arahy.N8DZQ8	-3.85068	0.000563894	0.00392034
arahy.SAV5EM	-3.848	0.0102803	0.0389894
arahy.Y9UCUD	-3.84645	0.00607671	0.0259038
arahy.KS7J3Q	-3.84284	2.20381e-07	5.59698e-06
arahy.9AN7FM	-3.83954	0.0011412	0.00689412
arahy.WNS2H5	-3.83838	0.000691705	0.00461405
arahy.6MPP0P	-3.83794	0.00439214	0.0200736
arahy.K9I1WZ	-3.83289	0.00996655	0.0381231
arahy.M7W292	-3.83094	0.00122397	0.00729651
arahy.C5I0M3	-3.83094	0.00257533	0.0132564
arahy.UNBX7R	-3.82731	3.51511e-06	5.97956e-05
arahy.32M24S	-3.82655	0.00296883	0.0147766
MSTRG.45373	-3.82312	4.92104e-05	0.000540878
arahy.3V8BTX	-3.822	0.00259084	0.0133158
arahy.K1Q5XX	-3.82018	0.0111236	0.0414475
arahy.6EEF97	-3.81824	9.28101e-09	3.62547e-07
arahy.ES5MTE	-3.81669	0.00542126	0.0237002
arahy.7PF8YM	-3.81294	1.48392e-05	0.000198806
arahy.BW40WK	-3.81183	0.000114434	0.00107784
arahy.SI2KIW	-3.81031	1.74025e-08	6.22625e-07
arahy.FC7X90	-3.80853	1.32585e-06	2.60529e-05
arahy.Z6EAYS	-3.80735	0.0010613	0.00650582
arahy.PLPB1B	-3.80735	1.97273e-05	0.000253027
arahy.J1Z9L2	-3.80735	0.00997369	0.0381445
arahy.28P5U9	-3.80602	0.000904948	0.00571139
arahy.8LB7BZ	-3.80317	5.73076e-10	3.07298e-08
arahy.QLM8IR	-3.80192	3.98162e-05	0.000454456
arahy.NQ88PQ	-3.7989	6.63509e-15	9.81155e-13
arahy.1D56YB	-3.79817	0.000818712	0.00526921
arahy.9E9N8A	-3.79672	1.29438e-05	0.00017832
arahy.6JCP40	-3.79514	1.70997e-27	1.89969e-24
arahy.1A4P42	-3.794	4.22896e-05	0.00047753
arahy.Q8BPMD	-3.7937	0.00154969	0.00882074
MSTRG.37404	-3.79141	0.00931774	0.0361488
arahy.M1D038	-3.79008	0.000706201	0.00467853
arahy.2TV28S	-3.78957	3.6586e-10	2.05865e-08
arahy.FG1WAN	-3.78932	0.0052124	0.0229673
arahy.WL96AD	-3.78683	3.10846e-14	4.16967e-12
arahy.PUL54B	-3.7866	0.0124765	0.0453271
arahy.R3RT9K	-3.78551	4.52751e-16	7.94184e-14
arahy.DIS46Y	-3.78465	1.92883e-13	2.17235e-11
arahy.I640G9	-3.78338	0.00356114	0.0170208
arahy.SKE9RM	-3.78136	4.32267e-08	1.37208e-06
arahy.V1SQAY	-3.77627	3.84056e-22	2.05432e-19
arahy.JX1FK0	-3.77575	0.0106684	0.0401417
arahy.ZT5PYH	-3.77529	0.000857899	0.00546701
arahy.PY163H	-3.77259	0.0133729	0.0478216
arahy.CF6KXU	-3.76907	1.29836e-05	0.000178698
arahy.DQYB4L	-3.7676	2.65847e-12	2.40467e-10
arahy.KW0BBJ	-3.76553	0.00895047	0.0350215
arahy.W4FXC4	-3.7625	0.003502	0.0168041
arahy.5PBU8Q	-3.75966	2.40616e-10	1.40881e-08
arahy.43WYWC	-3.75489	0.00582088	0.0250722
arahy.K2SWWG	-3.74957	0.000502214	0.00357239
arahy.0V89VS	-3.74894	0.00106573	0.00652556
arahy.P3BMC7	-3.74807	1.03783e-10	6.54529e-09
arahy.AHW3IA	-3.74723	1.28485e-07	3.53451e-06
arahy.5D64K0	-3.74339	0.000467148	0.00337054
arahy.W22NE1	-3.74277	3.49441e-06	5.94668e-05
arahy.E48QH9	-3.74193	0.000619267	0.00422886
arahy.F73KQI	-3.74147	0.000144195	0.00129725
arahy.WXP04W	-3.73954	0.0042705	0.01964
arahy.Z5JC91	-3.73891	0.00265898	0.0135712
arahy.HS80UB	-3.73697	0.00105099	0.0064522
arahy.NASX6J	-3.73503	3.07167e-06	5.33626e-05
arahy.TVNS6S	-3.73335	0.00140689	0.00816233
arahy.D5NCPP	-3.7318	0.00388482	0.0182557
MSTRG.14386	-3.73063	2.77713e-07	6.8522e-06
arahy.B25V59	-3.72796	2.20252e-11	1.62018e-09
arahy.13YW1E	-3.72792	4.99259e-07	1.13372e-05
arahy.E8SXRQ	-3.72701	1.22844e-13	1.45423e-11
arahy.3K3C0B	-3.72683	0.00420836	0.0194228
arahy.I42E36	-3.72379	5.58429e-05	0.000602316
arahy.T3CFRI	-3.72216	2.8012e-06	4.94167e-05
arahy.N7QM32	-3.72085	9.62457e-06	0.00013956
arahy.86U5T6	-3.71921	1.60165e-08	5.80224e-07
arahy.V5ST5E	-3.71882	0.0125566	0.0455456
arahy.0E1AJJ	-3.71621	2.08123e-08	7.25449e-07
arahy.WWD45I	-3.71621	0.012003	0.0439793
arahy.R3QID6	-3.71559	4.68035e-05	0.000519297
arahy.DY6AJ3	-3.71536	0.0129407	0.0465775
arahy.E5VA16	-3.71536	0.0129407	0.0465775
arahy.73MM12	-3.71344	6.94006e-31	1.0739e-27
arahy.C29XKN	-3.71149	0.00257266	0.013247
arahy.4FY7U3	-3.70966	0.00340369	0.0164387
arahy.1UCA9V	-3.70671	0.000160894	0.00141947
arahy.7739GT	-3.70615	5.65267e-12	4.77414e-10
arahy.SIZM0A	-3.70611	8.93451e-16	1.4775e-13
arahy.BH211Y	-3.70598	0.0140134	0.0495963
arahy.WW5SAZ	-3.70352	0.00847373	0.0335105
arahy.26IAC2	-3.70044	0.00305817	0.015124
arahy.93N1T8	-3.70044	0.00719217	0.029523
arahy.S4GWG4	-3.70044	0.00986965	0.0378159
arahy.0VCY6Y	-3.69674	0.00221215	0.0117538
arahy.1FMC3R	-3.69523	3.8605e-06	6.46056e-05
arahy.HPD6K5	-3.69349	0.00325281	0.0158674
arahy.880Q5H	-3.69116	0.0120826	0.0442183
arahy.5R3I64	-3.68871	1.63922e-12	1.54396e-10
arahy.EW9UD1	-3.68806	3.66637e-06	6.19068e-05
arahy.CP2NGN	-3.68806	0.00154248	0.00878779
arahy.FB8STF	-3.68576	5.24004e-05	0.000570192
arahy.8WED6E	-3.6845	0.00438876	0.0200696
arahy.UZ71G8	-3.68182	0.00114548	0.00691323
arahy.VA5QG3	-3.68182	0.0134084	0.0479083
arahy.LHW87W	-3.67914	0.000320136	0.00248442
arahy.BT9XI7	-3.67765	5.82012e-06	9.13985e-05
arahy.V9SGYL	-3.6763	0.00129225	0.0076207
arahy.SM84BW	-3.67596	2.39403e-05	0.000298149
arahy.K25JBG	-3.67345	1.58592e-12	1.49701e-10
arahy.69QE7M	-3.67243	0.000143559	0.00129233
arahy.J5FZ3I	-3.67243	0.000144871	0.00130224
arahy.E3RCDR	-3.67243	0.000110148	0.0010436
arahy.4YP1G2	-3.67103	4.48878e-05	0.000501769
arahy.4PNZ6Y	-3.66799	1.92434e-07	4.97172e-06
arahy.NH8KX3	-3.66676	0.00836244	0.0331521
arahy.PAGN6T	-3.66297	0.00908539	0.0354537
arahy.DBQ046	-3.65789	1.36022e-05	0.000185228
arahy.QR1WVV	-3.65718	1.11285e-07	3.12688e-06
arahy.P1P6E6	-3.65635	1.15611e-11	9.00911e-10
arahy.RPLV4X	-3.65151	7.52564e-10	3.90495e-08
MSTRG.17038	-3.65105	4.61293e-08	1.45462e-06
arahy.VNN4XC	-3.65101	7.51135e-12	6.11737e-10
arahy.DJQ4R3	-3.65041	2.11755e-08	7.35743e-07
arahy.S2H83J	-3.64962	0.00140644	0.0081609
arahy.4BAF6Y	-3.64962	0.0037192	0.0176362
arahy.DAE2HF	-3.64929	1.22172e-12	1.19759e-10
arahy.Q9ZI40	-3.64909	1.4789e-05	0.000198318
arahy.A1MQRB	-3.64739	0.000807091	0.00521223
arahy.02IZMF	-3.64717	1.19545e-08	4.53946e-07
arahy.L0YPF1	-3.6461	6.39918e-05	0.000673097
arahy.EA09C8	-3.64386	7.15402e-21	3.02304e-18
arahy.2KW6XR	-3.64386	0.00616877	0.0261982
arahy.KULZ0F	-3.64386	0.00950822	0.0367135
arahy.UV0H6R	-3.64155	0.000109361	0.00103773
arahy.T2M1NX	-3.64032	2.10224e-06	3.85785e-05
arahy.TTT4AK	-3.64	0.000336958	0.002589
arahy.78DFKN	-3.63819	0.00732368	0.029938
arahy.LGWD6U	-3.63743	0.00114383	0.00690689
arahy.UF7VZS	-3.63539	1.16601e-07	3.25305e-06
arahy.AHGI2W	-3.63485	0.00038204	0.00286619
arahy.V50231	-3.63485	0.00038204	0.00286619
arahy.HBJI5Q	-3.63452	0.00105502	0.00647189
arahy.52TI3X	-3.63364	2.505e-05	0.000310009
arahy.59XDTJ	-3.63364	0.0062713	0.02654
arahy.7N98ZI	-3.63136	1.82793e-07	4.74812e-06
arahy.I0T1AJ	-3.62975	0.00735587	0.0300388
arahy.JWD65V	-3.62894	4.60741e-10	2.53331e-08
arahy.VAYV9C	-3.62761	4.87107e-05	0.00053661
arahy.GDDA1J	-3.62741	0.000187951	0.00161383
arahy.SXC6IH	-3.6249	0.00759846	0.0308055
MSTRG.47764	-3.62015	7.94328e-05	0.000801487
arahy.PN0N9Z	-3.61891	0.00315377	0.0154917
arahy.2XVM9C	-3.61798	4.44784e-06	7.2694e-05
arahy.P7YIFG	-3.61599	0.00116875	0.00703118
arahy.KDEH1Y	-3.61566	0.000352784	0.00268631
arahy.QXQR94	-3.61471	0.00284288	0.0142826
arahy.T76A9L	-3.61413	7.79944e-32	1.25158e-28
arahy.0ZFC4V	-3.61382	0.000101759	0.000978457
arahy.MYUW9R	-3.60961	0.00118491	0.00710763
arahy.04GDI5	-3.60881	0.00599636	0.0256445
arahy.A621IZ	-3.60881	0.0139201	0.0493385
arahy.FG3TV9	-3.60715	0.0111306	0.0414628
arahy.5Y9TK9	-3.6059	4.73891e-05	0.000524453
arahy.35A5BC	-3.60486	0.00755097	0.0306474
arahy.N77NRG	-3.60242	3.73079e-08	1.2072e-06
arahy.33FPJE	-3.59932	0.00520334	0.0229461
arahy.PS5WXW	-3.59648	0.00013593	0.00123598
MSTRG.27391	-3.59447	0.0072873	0.02984
arahy.G5WMYY	-3.58871	0.00030609	0.00239343
arahy.6H4NJX	-3.5875	3.83008e-08	1.23472e-06
arahy.Y1VXK6	-3.58496	3.85645e-07	9.09077e-06
arahy.32EWNN	-3.5813	1.2116e-05	0.000168794
arahy.WB1K52	-3.5778	5.55636e-07	1.23647e-05
arahy.VAX71W	-3.57671	7.92075e-08	2.32982e-06
arahy.KY6G5X	-3.57568	0.00374555	0.0177378
arahy.GYJ6B7	-3.56847	0.00394908	0.0184795
arahy.4YM5KJ	-3.56828	0.000131536	0.00120279
arahy.W2MXXV	-3.56682	0.00044769	0.00325837
arahy.CTC1PY	-3.55959	1.48948e-06	2.88875e-05
arahy.7Y3SM7	-3.55565	0.00140835	0.0081697
arahy.913J1N	-3.55459	0.00659659	0.0276279
arahy.6F344G	-3.55439	1.26567e-06	2.50172e-05
arahy.52N7XM	-3.55325	9.4227e-05	0.000920742
arahy.7AQZ6X	-3.55268	1.76175e-06	3.32454e-05
arahy.CKB6LS	-3.55232	0.000513869	0.00363976
arahy.LR8YZ7	-3.5518	0.00459649	0.0207818
arahy.MLE48V	-3.55117	2.69341e-07	6.67605e-06
arahy.F8CF98	-3.54963	0.00479795	0.0214953
arahy.H0GHKL	-3.54928	2.41284e-05	0.000299975
arahy.9CA2Y1	-3.54432	0.00239639	0.012523
arahy.QR5N80	-3.54432	0.0044015	0.0200955
arahy.15A7AE	-3.5438	7.45526e-16	1.26177e-13
arahy.I67FLR	-3.54367	9.92329e-06	0.000143315
MSTRG.34412	-3.54	6.73354e-05	0.000700466
arahy.G2WE73	-3.53916	0.00691801	0.0286582
arahy.PU1FVJ	-3.53896	0.00231059	0.0121612
arahy.AX54M2	-3.53507	3.95586e-11	2.71626e-09
MSTRG.25403	-3.53492	0.00048625	0.00347767
arahy.TF3SPP	-3.53318	0.000690327	0.00460718
arahy.WX8JWL	-3.52985	2.0964e-07	5.34928e-06
arahy.IE6A37	-3.52774	0.0138463	0.0491106
arahy.D7QF3J	-3.52253	4.65501e-06	7.56801e-05
arahy.P0W3IN	-3.52253	4.65501e-06	7.56801e-05
arahy.EL0VSN	-3.52059	9.22782e-06	0.00013523
arahy.VC882V	-3.5205	0.000193644	0.0016525
arahy.J6ELEK	-3.51833	7.7417e-07	1.64343e-05
arahy.SJ8MZN	-3.51728	0.00518872	0.0228956
arahy.ND5IN9	-3.51457	0.00303023	0.0150184
arahy.U0YEJU	-3.51331	7.96015e-17	1.62684e-14
arahy.VGWE53	-3.51218	2.85941e-07	7.02986e-06
arahy.968T1Y	-3.51211	0.0115357	0.0426504
arahy.7L8B8I	-3.50843	0.00386134	0.0181742
arahy.G3522P	-3.50815	0.000510777	0.003623
MSTRG.5625	-3.50802	0.00406716	0.0189095
arahy.6F6EX1	-3.50721	0.000631258	0.00428826
arahy.N4ZDV4	-3.50462	0.00028083	0.00223276
arahy.08LKRL	-3.50462	0.0011197	0.00679365
arahy.91A0PW	-3.50383	0.0020344	0.0109728
arahy.I0I8XZ	-3.50322	0.00153826	0.00876835
arahy.MV0Z6Q	-3.50151	0.000153911	0.00137155
arahy.F05SPM	-3.50045	2.36457e-06	4.26697e-05
arahy.5YG8M2	-3.50027	0.00280894	0.0141581
arahy.9V629R	-3.49643	0.0123773	0.0450498
arahy.06ZF6Z	-3.49571	5.7212e-13	6.0312e-11
arahy.2V6C5Z	-3.49541	0.00377716	0.0178587
arahy.FHP2K2	-3.49412	5.26803e-05	0.000572767
arahy.B3FCUF	-3.49349	0.00151991	0.00868545
arahy.2D2JRR	-3.49185	0.000678896	0.00454138
arahy.YRV6S7	-3.49162	7.44299e-11	4.84936e-09
arahy.GKYN88	-3.48902	1.21536e-08	4.58783e-07
arahy.EB1W4P	-3.48733	4.15856e-16	7.38434e-14
arahy.ATL5H8	-3.48699	0.00396564	0.018541
arahy.H0U1UD	-3.4864	7.14768e-06	0.000108548
arahy.RRC04T	-3.48308	0.00949458	0.0366805
arahy.B771QR	-3.48113	0.000540049	0.00378988
arahy.Q1NA6L	-3.48113	0.0116064	0.0428742
arahy.31BJ59	-3.47947	4.49218e-05	0.000502018
arahy.TAR5IY	-3.47939	0.00376458	0.0178124
arahy.P8M8R5	-3.47665	4.33264e-05	0.000486952
MSTRG.48485	-3.47524	0.00394025	0.0184513
arahy.8GI8KI	-3.47342	3.58938e-07	8.57315e-06
arahy.RA398F	-3.47275	0.00061419	0.00420188
arahy.4GF8V7	-3.47187	3.11639e-05	0.000370817
arahy.85G940	-3.47131	0.00529326	0.0232527
arahy.CTTM8W	-3.46686	6.95231e-14	8.70586e-12
arahy.B8RZEA	-3.46489	0.00182452	0.0100651
arahy.N7I060	-3.46467	0.000157485	0.00139753
arahy.E29QEI	-3.46419	0.00193371	0.0105378
arahy.CVHH82	-3.46162	0.000220792	0.00183649
arahy.76C240	-3.45943	0.0013615	0.00794902
arahy.V20YGC	-3.45943	0.00182476	0.0100651
arahy.PGE1MU	-3.45914	0.00608741	0.0259406
arahy.3BRQ4W	-3.45568	6.41143e-07	1.39382e-05
arahy.5F6CY5	-3.44798	5.52067e-06	8.7522e-05
arahy.Q94UE0	-3.44788	0.000125619	0.00116173
arahy.R57YID	-3.44373	7.16724e-05	0.000736913
arahy.4BS23W	-3.44032	7.22839e-07	1.54812e-05
arahy.FZM120	-3.43933	0.012688	0.0459106
arahy.D87PD7	-3.43892	7.43844e-05	0.00075957
arahy.6GA0DJ	-3.43783	0.00520153	0.0229428
arahy.M24PNR	-3.43684	6.64876e-05	0.000694314
arahy.PWN22Y	-3.43682	0.00249056	0.0129263
arahy.48HC15	-3.43582	1.97707e-10	1.18152e-08
arahy.HJ8AGK	-3.43463	0.000889564	0.00563637
arahy.980TN7	-3.43296	0.0015329	0.00874697
arahy.1L37A5	-3.43296	0.00336067	0.0162894
arahy.80WNUL	-3.42824	1.67607e-06	3.19486e-05
arahy.275AW9	-3.42626	1.9845e-05	0.00025416
arahy.MZYS79	-3.42403	0.00124725	0.00740901
arahy.3YMB7T	-3.42381	0.000382163	0.00286619
arahy.GMG7CI	-3.42381	0.000382163	0.00286619
arahy.T6QC8B	-3.42321	2.10101e-08	7.31169e-07
arahy.65N627	-3.42321	1.20813e-08	4.57157e-07
arahy.V37JW4	-3.41986	3.17e-05	0.000375675
arahy.06P6RC	-3.41954	0.00719616	0.0295338
arahy.AX4MZY	-3.41954	0.00408091	0.018958
arahy.V8ELJA	-3.41157	1.07304e-07	3.0347e-06
arahy.4GZY6Y	-3.4063	0.00166219	0.00932029
arahy.X0CD3J	-3.40534	2.66364e-05	0.000326102
arahy.EM5GCM	-3.40125	6.11677e-06	9.51602e-05
arahy.255VJ8	-3.39855	1.72169e-07	4.51548e-06
arahy.PUMP6L	-3.39771	4.32015e-16	7.63997e-14
arahy.GX8EW1	-3.39706	1.37418e-07	3.7399e-06
arahy.KL0ZPB	-3.39453	8.98306e-08	2.60313e-06
arahy.5L9AX6	-3.39408	1.96739e-06	3.64902e-05
arahy.JT7ZMS	-3.39232	0.00761447	0.0308588
arahy.773MH2	-3.39232	0.00993423	0.0380163
arahy.AAGX57	-3.39091	0.000321612	0.00249365
arahy.L04U7Y	-3.38904	0.00329983	0.0160552
arahy.F2TBWJ	-3.38827	0.000377014	0.00283789
arahy.6P4JRH	-3.38606	0.00935072	0.0362475
arahy.ZQ7JRA	-3.38082	0.00598983	0.0256191
arahy.ERJN8A	-3.37954	2.38686e-05	0.000297352
arahy.YC2TAI	-3.37851	0.0101183	0.0385356
arahy.YZ918W	-3.37659	9.2489e-06	0.000135472
arahy.WIE6UT	-3.37638	0.000760797	0.00496462
arahy.S3ZP24	-3.37567	9.66492e-08	2.77136e-06
arahy.2HNW91	-3.37432	1.42986e-10	8.79994e-09
arahy.PT3XPU	-3.37223	1.22927e-05	0.000171036
MSTRG.47838	-3.37182	0.000339987	0.00260904
arahy.19E8GC	-3.37109	3.96372e-06	6.59762e-05
arahy.L7S9V2	-3.36923	0.00869563	0.0342194
arahy.6FF65R	-3.36565	1.78568e-09	8.48336e-08
arahy.KRC5M1	-3.36518	0.000264794	0.00213011
arahy.SV5QUW	-3.36355	0.00158178	0.00896803
arahy.4KB8BX	-3.3634	0.000209103	0.00175851
arahy.Y8TVDJ	-3.3634	0.00122694	0.00731041
arahy.S7JP6V	-3.36119	0.000888298	0.00562926
arahy.V5BWWI	-3.3594	2.86049e-07	7.02986e-06
arahy.CMRQ0D	-3.35856	4.44104e-06	7.26158e-05
arahy.DFT7B3	-3.35755	2.19503e-07	5.57796e-06
arahy.HP46HH	-3.35645	1.19578e-05	0.000167074
arahy.P48134	-3.35642	8.80718e-07	1.84164e-05
arahy.YW5T73	-3.35588	0.000464613	0.00335673
arahy.1TFV27	-3.35509	2.3596e-09	1.09459e-07
arahy.TIC55L	-3.35334	0.00116148	0.00699324
arahy.LK8GY6	-3.35239	0.000112145	0.00106043
arahy.M1ZEFN	-3.34868	5.53489e-09	2.30365e-07
arahy.F74L81	-3.34514	7.39345e-06	0.000111771
arahy.26UNPR	-3.34501	0.0136587	0.0486192
arahy.4XXP0Y	-3.34141	7.33336e-10	3.8235e-08
arahy.KY1P9Y	-3.33902	0.00164495	0.00925114
arahy.RP94VE	-3.33791	4.30216e-07	9.99463e-06
arahy.4GV2RR	-3.33703	6.79572e-06	0.000104079
arahy.PTFL6P	-3.33498	0.00162675	0.00916662
arahy.PUQJ4X	-3.33184	0.00554988	0.0241426
arahy.FW39NC	-3.33121	0.00455587	0.0206391
arahy.8UW8J8	-3.33015	4.65689e-05	0.000517356
arahy.53UQ7J	-3.32896	0.000443707	0.00323264
arahy.US0JF3	-3.32567	4.71721e-10	2.58059e-08
arahy.J8WCL7	-3.32517	0.000310651	0.00242297
arahy.KXRU9A	-3.32402	0.000318047	0.00247175
arahy.YZ9ULU	-3.32265	1.17078e-20	4.65381e-18
arahy.NSTM2K	-3.32213	0.00134149	0.00785869
arahy.5185HY	-3.32193	0.00426275	0.0196131
arahy.MD3LS0	-3.32193	0.00426275	0.0196131
arahy.AS5DTW	-3.32193	0.0111172	0.041431
arahy.28ZKUT	-3.32176	8.50244e-15	1.23619e-12
arahy.H5PBDQ	-3.32176	8.50244e-15	1.23619e-12
arahy.5BD9V0	-3.32019	0.000114612	0.00107881
arahy.TQH2IV	-3.31603	0.00638955	0.0269247
arahy.41Y8SN	-3.3159	0.0100551	0.0383872
arahy.5IW37T	-3.31389	0.0141484	0.049919
arahy.RLTX4G	-3.31241	0.00420728	0.0194228
arahy.EGZY1N	-3.31079	0.000317736	0.00247022
arahy.NH5LZK	-3.3104	9.56499e-09	3.72682e-07
arahy.SG2NR1	-3.31005	0.000352204	0.00268236
arahy.E295CW	-3.30978	7.99975e-06	0.000119601
arahy.WFL2XE	-3.30927	2.66252e-22	1.49817e-19
arahy.IN8D84	-3.30892	0.000191204	0.00163625
arahy.TH2L6Q	-3.30743	0.00272188	0.0138104
arahy.2S0QXG	-3.30378	0.0010638	0.00651744
arahy.HW8B30	-3.30299	0.000275592	0.00220022
MSTRG.47673	-3.30157	0.000354729	0.00269827
arahy.YP2NLQ	-3.30117	0.00143809	0.0083155
MSTRG.9210	-3.30117	0.00175676	0.00974837
arahy.94TNN4	-3.30066	0.000126767	0.00116985
arahy.L4TARN	-3.29999	0.00399837	0.0186578
arahy.794JCX	-3.29956	0.001905	0.0104149
arahy.FXN302	-3.29956	0.00968938	0.0372669
arahy.X14VTN	-3.29768	0.000345594	0.00264201
arahy.FNG8N4	-3.29652	3.56532e-16	6.46338e-14
arahy.V3QVP0	-3.29531	1.7263e-07	4.52484e-06
arahy.E15ZAA	-3.29317	9.47691e-06	0.000137972
arahy.MM0VDP	-3.29182	3.93835e-06	6.56043e-05
arahy.DM6910	-3.29101	1.16251e-05	0.000163165
arahy.165IIH	-3.28951	1.02797e-05	0.000147431
arahy.IY3TI3	-3.28758	0.0111136	0.0414247
arahy.NY64DB	-3.28758	0.0118209	0.0434885
arahy.8WZF3G	-3.28716	0.000185122	0.00159301
arahy.79B99S	-3.2822	0.000506521	0.00359813
arahy.4TT2MT	-3.28157	0.000294801	0.00232445
arahy.41CPL5	-3.27879	1.97072e-06	3.65363e-05
arahy.GMWI1E	-3.27759	8.90841e-09	3.49932e-07
arahy.A91ASK	-3.27739	2.78304e-07	6.86288e-06
arahy.T9QV62	-3.2769	0.00131106	0.00771482
arahy.Q700U9	-3.27567	1.36201e-11	1.04261e-09
arahy.S9L9ZX	-3.27563	0.0025865	0.0133
arahy.N26BUN	-3.27563	0.0126951	0.0459209
arahy.7LP25W	-3.27302	0.0045443	0.0205974
arahy.H5UTXB	-3.27223	6.366e-09	2.59962e-07
arahy.E9FCC2	-3.27146	0.000344693	0.0026374
arahy.78LN1U	-3.27085	0.00163183	0.00919146
arahy.NX02M0	-3.27053	0.00591947	0.0253939
MSTRG.22773	-3.2691	0.000421487	0.00310574
arahy.R4CPVK	-3.26679	5.44597e-12	4.64483e-10
arahy.80GNXC	-3.26679	1.77052e-09	8.42057e-08
arahy.29G5I6	-3.26434	2.84156e-05	0.000343804
arahy.SVI1UB	-3.26053	8.11333e-05	0.000815439
arahy.N8FZH3	-3.26053	0.00980924	0.0376377
arahy.7DV1VQ	-3.26051	0.00851529	0.0336442
arahy.8QL644	-3.25817	1.54941e-07	4.12797e-06
arahy.N96YDH	-3.25303	6.85645e-35	1.56352e-31
arahy.V9NZM2	-3.25096	0.00240192	0.0125429
arahy.4N1P2Y	-3.2483	4.77024e-09	2.02429e-07
arahy.SLIY4S	-3.24793	0.000258837	0.00208955
arahy.N991H8	-3.24793	0.000348991	0.00266304
arahy.7IXS5T	-3.24647	1.91885e-14	2.67325e-12
arahy.HA71N0	-3.24535	1.52873e-06	2.95297e-05
arahy.LRS80B	-3.24393	0.00935727	0.0362673
arahy.HR53B8	-3.24207	0.00388344	0.0182529
arahy.9S7XN2	-3.24101	0.0109052	0.0408197
arahy.A3F71V	-3.23997	0.00240724	0.0125578
arahy.N9UI7L	-3.23967	0.00335993	0.0162891
arahy.DY9DHP	-3.2384	0.00157053	0.00891358
arahy.LFH2Q4	-3.23704	0.00951124	0.0367219
arahy.1A1ACU	-3.23573	0.00185312	0.0101891
arahy.SHHZ9W	-3.23395	5.85841e-11	3.89306e-09
arahy.F0FI7G	-3.23344	7.4765e-07	1.59731e-05
arahy.FJ0G75	-3.2333	1.10466e-07	3.11195e-06
arahy.T38HF5	-3.23116	0.00326458	0.0159177
arahy.71G8UT	-3.22844	7.4437e-06	0.000112374
arahy.RZ4SGF	-3.22766	5.07229e-19	1.46512e-16
arahy.I442D3	-3.22632	3.87527e-08	1.2465e-06
arahy.FVP67A	-3.22542	0.00285698	0.0143363
arahy.C9I5IG	-3.22329	6.69091e-09	2.71185e-07
arahy.5K77QF	-3.22239	0.00301603	0.0149617
arahy.49RGKV	-3.221	0.00138775	0.00807617
arahy.86ZX86	-3.21988	9.4737e-05	0.000924475
arahy.R3Y850	-3.21968	0.000522262	0.00368715
arahy.RUJ0QA	-3.21864	0.00306403	0.0151512
arahy.V7Z85T	-3.21723	0.000166029	0.00145765
arahy.35WTTC	-3.21723	0.000300384	0.0023586
arahy.XKLY96	-3.21632	0.012718	0.045979
arahy.X6JA7U	-3.21445	4.74785e-15	7.16759e-13
arahy.ASBV53	-3.21444	0.00519556	0.0229234
arahy.T19D7U	-3.21378	2.72931e-07	6.75344e-06
arahy.RMH1PV	-3.21327	0.00410759	0.0190464
arahy.YP8KSB	-3.21299	0.00387001	0.0182059
arahy.4B2CWV	-3.21299	0.00901822	0.035236
arahy.YDQ82R	-3.21141	6.7409e-10	3.56175e-08
arahy.VFYD46	-3.21059	0.00186404	0.010244
arahy.RJX8W8	-3.21011	5.01954e-06	8.06981e-05
arahy.T08SBC	-3.20696	0.00042447	0.00312188
arahy.HJ5V42	-3.20584	5.01498e-07	1.13711e-05
arahy.09DD91	-3.19938	3.04996e-08	1.01651e-06
arahy.79WGU4	-3.19922	1.58584e-07	4.21533e-06
arahy.HLIX3I	-3.19741	0.00160503	0.00908558
arahy.8D8HC8	-3.1952	4.56202e-07	1.05128e-05
MSTRG.29501	-3.1948	9.86092e-05	0.000954622
arahy.1U7IT4	-3.19476	0.000490703	0.00350374
arahy.K9F3KZ	-3.19459	0.0016736	0.00937453
arahy.RUK088	-3.19405	1.28245e-12	1.24864e-10
arahy.HLI3FT	-3.19265	0.0127032	0.0459387
arahy.HXS3HA	-3.19195	0.000706393	0.00467909
arahy.MKLC0K	-3.19151	3.04917e-05	0.000364386
arahy.QFUU5V	-3.19114	0.00343357	0.016548
arahy.B0V7RI	-3.19114	0.012771	0.0461068
arahy.V0RRMI	-3.18923	0.000288273	0.00227962
arahy.SS1VDK	-3.18888	1.19721e-05	0.000167192
arahy.UH4MW5	-3.18536	2.32935e-06	4.20866e-05
arahy.TT6QCG	-3.18078	6.1629e-17	1.28375e-14
arahy.EBVI20	-3.18052	2.82888e-08	9.50868e-07
arahy.06HSAJ	-3.17983	3.07075e-06	5.33626e-05
arahy.QA5S84	-3.17897	0.000485059	0.00347248
arahy.YRTL7F	-3.17812	0.0104869	0.0396067
arahy.BY45PL	-3.17774	2.00884e-07	5.17153e-06
arahy.I9XM75	-3.17623	0.000225162	0.00186591
arahy.PN2V7H	-3.17196	2.15299e-07	5.48075e-06
arahy.D3QW6U	-3.16993	0.00124737	0.00740901
arahy.ZECH1J	-3.16993	0.00614724	0.0261213
arahy.1RT5A7	-3.16924	1.9898e-05	0.000254688
arahy.K8M445	-3.16924	1.9898e-05	0.000254688
MSTRG.18536	-3.16651	3.01772e-07	7.36198e-06
arahy.17ZWHA	-3.16547	0.00251597	0.0130254
arahy.11EUX6	-3.15904	1.31692e-05	0.000180792
arahy.T1S7CJ	-3.15458	2.09371e-07	5.34872e-06
arahy.T1SZCK	-3.15016	8.63906e-07	1.81115e-05
arahy.BTM1YE	-3.14986	0.000573441	0.00397337
arahy.UX09RC	-3.14975	0.00560034	0.0243181
arahy.P6VCNZ	-3.14952	1.12539e-08	4.2998e-07
arahy.QY9S03	-3.14942	2.29383e-06	4.15661e-05
arahy.PA2G9N	-3.1476	5.96607e-06	9.32174e-05
arahy.H8IAYR	-3.14684	2.34137e-05	0.000292432
arahy.AQ6B1J	-3.14598	0.0048101	0.021543
arahy.YC3N4I	-3.14439	0.00451228	0.0204973
arahy.SZD3Q1	-3.14285	3.14154e-05	0.000372913
arahy.B3EP0P	-3.14136	0.00227015	0.0119935
arahy.VJQ7J1	-3.14123	1.08629e-06	2.19215e-05
arahy.I1VTPH	-3.13699	0.0076663	0.0310196
arahy.DWWZ6G	-3.13637	4.41467e-08	1.39718e-06
arahy.5VD7UA	-3.13572	0.000251368	0.0020399
arahy.N9G8JV	-3.13245	0.00697826	0.0288499
arahy.LMT3MR	-3.13203	0.00786542	0.0316389
arahy.PH74U7	-3.13053	0.000443202	0.00323005
arahy.P7SNS1	-3.12982	1.24111e-38	3.36085e-35
arahy.0HP51M	-3.12928	0.00148529	0.00853149
arahy.GB08AC	-3.12823	0.00754255	0.0306218
arahy.BLWT23	-3.1281	0.00262327	0.01343
arahy.NK786X	-3.12489	0.000763911	0.00497939
arahy.XG11M2	-3.12272	5.61081e-05	0.000604505
arahy.V872M0	-3.12051	0.0017961	0.00993228
arahy.FW0QWP	-3.11548	4.11332e-05	0.000466783
arahy.1WJI3I	-3.11548	3.56561e-05	0.000414508
arahy.606BFT	-3.1133	4.33375e-13	4.68251e-11
arahy.AKB6VZ	-3.11329	0.000231336	0.00190625
arahy.WNQC8Q	-3.11141	0.000230522	0.00190027
arahy.71MEN5	-3.11128	5.08209e-08	1.5807e-06
arahy.5B6ZAR	-3.11042	1.42659e-06	2.78046e-05
arahy.A6PFHD	-3.11042	0.00134536	0.00787492
arahy.DWP65P	-3.10884	4.72893e-05	0.000523883
arahy.BR0SNA	-3.1081	0.000103894	0.000995288
arahy.TQHX8C	-3.10753	0.00200745	0.0108613
arahy.Q9UH73	-3.1026	2.59556e-10	1.50546e-08
arahy.S69P4W	-3.10215	0.000100864	0.000972434
arahy.J5XN66	-3.10178	1.10814e-09	5.5314e-08
arahy.VMK2JT	-3.10073	0.0022226	0.0117912
arahy.6KSP6K	-3.09954	0.000478187	0.00343134
arahy.26JPZN	-3.09778	5.07074e-06	8.13402e-05
MSTRG.38278	-3.0965	0.0102197	0.0388069
arahy.IF1UXG	-3.09516	2.01522e-05	0.000257638
arahy.AR01JJ	-3.09424	2.9546e-05	0.000354511
arahy.NF6T15	-3.0932	5.70314e-12	4.80739e-10
arahy.RCXU7Z	-3.08981	3.24648e-07	7.83623e-06
MSTRG.15585	-3.08632	3.65008e-06	6.16799e-05
arahy.VUQ1KR	-3.08539	4.16669e-07	9.73733e-06
arahy.YTRP8E	-3.08299	5.60826e-08	1.71337e-06
arahy.TE50WE	-3.08179	0.00186886	0.0102616
arahy.ISEH0C	-3.08179	0.0125156	0.0454499
arahy.873UVH	-3.08158	6.3044e-06	9.75887e-05
arahy.LLR3FQ	-3.08092	0.00312614	0.0153811
arahy.YFDY0T	-3.08029	0.000784432	0.00508914
arahy.G3J01C	-3.07853	3.0547e-05	0.000364805
arahy.83QM18	-3.07793	1.25506e-06	2.48522e-05
arahy.SM45K0	-3.07635	0.000620452	0.0042341
arahy.7X4FVF	-3.0755	1.52852e-07	4.08048e-06
arahy.CTTQ97	-3.07529	0.000389845	0.0029092
arahy.2G4BRW	-3.07489	2.94786e-07	7.20371e-06
arahy.J102QK	-3.07468	0.000844671	0.00540178
MSTRG.46840	-3.06852	0.000294776	0.00232445
arahy.L5L12B	-3.06805	0.000694392	0.00462674
arahy.NI3B5C	-3.06677	0.000154644	0.00137597
arahy.JQI30Y	-3.06609	0.0114325	0.0423437
arahy.EBD336	-3.06261	0.00903391	0.035291
arahy.L3EDXB	-3.06197	6.01522e-06	9.37825e-05
arahy.4V96S8	-3.06193	0.00251852	0.013037
arahy.J0HSVP	-3.06009	0.00126522	0.00748779
arahy.672M4G	-3.05135	8.23854e-05	0.000826467
arahy.Y8TUYE	-3.05063	0.00498408	0.0221957
arahy.N8WSNB	-3.04776	6.51214e-09	2.64931e-07
MSTRG.1162	-3.04755	0.000198696	0.00168721
arahy.GQP3LI	-3.04751	7.68872e-05	0.000780345
arahy.UT7DLW	-3.04731	0.00914695	0.0356426
arahy.0G9KRE	-3.04629	0.00306556	0.0151523
arahy.RY71RI	-3.04601	0.00642018	0.0270301
arahy.HQU2A8	-3.04541	9.0962e-09	3.56339e-07
arahy.80FYU6	-3.04439	0.00138147	0.00804718
arahy.449J5H	-3.04047	0.0010322	0.00635796
arahy.CWZU13	-3.03851	2.19217e-10	1.29577e-08
arahy.IDM16Y	-3.0372	5.72831e-07	1.27212e-05
arahy.L3JBZI	-3.03545	4.93522e-09	2.08613e-07
arahy.4N1DCM	-3.03538	0.00120653	0.00721325
arahy.1CC5AH	-3.0352	2.41543e-19	7.47838e-17
arahy.M5F7QZ	-3.03342	0.000786042	0.0050968
arahy.M9AABA	-3.03328	2.25823e-11	1.65274e-09
arahy.LS9UD4	-3.02975	0.00130856	0.00770328
arahy.WS4P7I	-3.02936	1.33101e-08	4.98004e-07
arahy.RFL709	-3.02748	0.0010244	0.00631896
arahy.J26PKP	-3.02594	7.28073e-06	0.000110375
arahy.NR3S8D	-3.02411	8.09158e-08	2.37523e-06
arahy.P5P8C7	-3.02035	6.61159e-05	0.000690765
arahy.N0QBSQ	-3.01792	2.84817e-12	2.55786e-10
arahy.JZ966I	-3.01738	5.14134e-11	3.44828e-09
arahy.FZ214Z	-3.01715	0.00306519	0.0151523
arahy.P8FLYC	-3.01649	0.00139171	0.00809269
arahy.DWDV7D	-3.0156	0.0110752	0.0412992
arahy.1Z2C89	-3.01511	3.60792e-09	1.59186e-07
arahy.SWM3ME	-3.01495	0.00578436	0.0249397
arahy.MJLC3N	-3.01238	0.000653832	0.00440445
arahy.6IM7DK	-3.01228	1.04545e-07	2.96635e-06
arahy.CTL4DA	-3.00998	0.00702889	0.0290149
arahy.SA7CU8	-3.00987	0.000737295	0.00484526
arahy.YUG4Q7	-3.00972	0.0130406	0.0468539
arahy.LI4T5E	-3.00899	0.00063014	0.00428412
arahy.AG833H	-3.00899	0.00319443	0.015639
arahy.SEBE8L	-3.00881	1.06619e-06	2.1546e-05
arahy.79FMKA	-3.00761	3.02448e-07	7.37017e-06
arahy.3LU7BR	-3.00749	0.00120618	0.00721228
arahy.HP6SUR	-3.00666	0.00658181	0.027574
arahy.V2N30X	-3.00498	5.06209e-08	1.57561e-06
arahy.Z3D5KE	-3.00459	1.71485e-28	2.12283e-25
arahy.HXE52Q	-3.00424	0.000357418	0.00271539
arahy.26R06I	-3	7.63327e-05	0.000775807
arahy.ARB9WH	-3	0.000854949	0.00545219
arahy.4BNM0X	-3	0.000890958	0.005642
arahy.WF5046	-3	0.00150912	0.00863427
arahy.ZFC6L6	-3	0.00188439	0.0103256
arahy.90HG3Y	-3	0.00346574	0.0166752
arahy.1FPN7V	-2.99615	0.00327405	0.0159521
arahy.KV2ITS	-2.99408	0.00634734	0.0267781
arahy.CR8I6X	-2.99366	0.00162125	0.0091518
arahy.N5CJ77	-2.99366	0.00162125	0.0091518
arahy.LDSG15	-2.99311	0.0101458	0.0386078
arahy.BZ7TGJ	-2.99172	4.55721e-07	1.05128e-05
arahy.WBP5Q2	-2.99157	0.0025931	0.0133212
arahy.Y3R0BI	-2.99095	0.00279435	0.0140958
MSTRG.22424	-2.99077	0.000560032	0.00389916
arahy.HZ0MGW	-2.98995	0.00294842	0.0146953
MSTRG.31353	-2.98751	2.43239e-05	0.000301972
arahy.IY6L91	-2.98547	6.18421e-07	1.3521e-05
arahy.P7PSM7	-2.98445	0.000166806	0.0014624
arahy.08HL65	-2.9839	1.27032e-07	3.49677e-06
arahy.QVEY1G	-2.98272	7.34128e-05	0.000751242
arahy.ABYE4R	-2.98084	7.25427e-09	2.90218e-07
arahy.JLK6ZC	-2.98028	8.98679e-05	0.000886747
arahy.DXT6EF	-2.98025	9.59056e-07	1.97495e-05
arahy.14QNZ5	-2.97998	1.36536e-08	5.08657e-07
arahy.D3EHI2	-2.97982	0.00237447	0.0124355
arahy.2DQF79	-2.97888	0.00204956	0.0110381
arahy.Q7SBED	-2.97881	1.11555e-05	0.000157336
MSTRG.554	-2.97769	3.96875e-07	9.34026e-06
arahy.SGCH0F	-2.97756	9.04267e-07	1.88134e-05
MSTRG.23402	-2.97503	0.00356645	0.0170387
arahy.NM19P7	-2.974	0.00018002	0.00155777
arahy.RRN87R	-2.97384	0.00107088	0.00654784
arahy.KTW86Y	-2.97303	0.00963527	0.0371181
arahy.SJW8XV	-2.97118	0.00490236	0.0218951
arahy.IDM7IB	-2.97085	0.00702133	0.0289975
arahy.825X9M	-2.96963	0.000161214	0.00142201
arahy.7K1R9Z	-2.96897	0.000118679	0.00110963
arahy.TS0Z6E	-2.96875	0.000659195	0.00443011
arahy.M98PV5	-2.96849	0.000495916	0.00353513
arahy.RE7MP5	-2.96367	8.98811e-08	2.60313e-06
arahy.FHKG10	-2.96292	4.20846e-07	9.80849e-06
arahy.XRS9CS	-2.96099	0.00269809	0.0137188
arahy.PK2PPV	-2.96025	0.00505422	0.0224093
arahy.YC4E9Q	-2.95936	0.000238749	0.00195766
arahy.J2ILTU	-2.95842	0.00548195	0.023907
arahy.GP7DSL	-2.95654	1.11131e-06	2.2364e-05
arahy.KIH7N1	-2.95205	0.00137769	0.00803056
arahy.T7N4G8	-2.95198	0.00013666	0.00124052
arahy.98HCYL	-2.95174	4.8342e-08	1.51338e-06
MSTRG.24733	-2.94971	8.8837e-07	1.85317e-05
arahy.C25ZDC	-2.9493	3.95572e-10	2.20863e-08
arahy.L3XW27	-2.9493	0.011776	0.0433711
arahy.HT12QJ	-2.9486	0.00502565	0.0223104
arahy.P6GPQZ	-2.94702	0.0003771	0.00283804
arahy.WNQ9XL	-2.94623	0.000961447	0.00600066
arahy.ZUTV6V	-2.94618	0.0116964	0.0431255
arahy.A7Y8RN	-2.94596	0.0101986	0.0387475
arahy.P9E96K	-2.94513	1.58282e-05	0.000210042
arahy.GVI4HJ	-2.94429	0.00390364	0.0183195
arahy.B8VHIV	-2.94235	1.38199e-05	0.000187936
arahy.6UHH7V	-2.9386	0.00556235	0.0241749
arahy.YCEX9W	-2.9386	0.0066004	0.0276412
arahy.JE36Z4	-2.93826	0.0001884	0.0016164
arahy.G2FLC9	-2.93325	1.15859e-05	0.000162823
arahy.LW385E	-2.93289	0.000103501	0.000992561
arahy.U3Z2PN	-2.93289	0.000256461	0.0020743
arahy.T95NYF	-2.93039	0.00110146	0.00670171
arahy.LMI6R7	-2.92953	4.19376e-07	9.78476e-06
arahy.PZ4M2K	-2.92785	8.22315e-13	8.50321e-11
arahy.69JDQK	-2.92519	0.0045303	0.0205616
arahy.N6N04K	-2.92232	0.0072642	0.0297623
arahy.Z3I63Q	-2.922	0.000752807	0.00492103
arahy.Z4CR3N	-2.92177	0.00399523	0.0186535
arahy.UBHF2S	-2.92066	1.29818e-13	1.53259e-11
arahy.KP3Y1K	-2.92057	0.00393666	0.0184373
MSTRG.20670	-2.91938	0.000653387	0.00440398
arahy.5WZ8DH	-2.91928	0.00444657	0.020269
arahy.6S4AXF	-2.91862	3.27108e-06	5.62183e-05
arahy.T02M6I	-2.91754	1.17271e-05	0.000164335
arahy.206U1W	-2.91693	0.000229749	0.00189426
arahy.E3U0AR	-2.91617	0.00778402	0.0314021
arahy.L4PA5N	-2.91467	8.34455e-05	0.000834397
arahy.J17R0W	-2.91363	2.95446e-08	9.86953e-07
arahy.S6ZM1I	-2.9128	2.57508e-11	1.84414e-09
arahy.IMK8G3	-2.91181	1.5527e-05	0.000206679
arahy.424QFW	-2.90835	2.38695e-05	0.000297352
arahy.069QKB	-2.90689	0.00233497	0.0122716
arahy.5RL6NX	-2.90689	0.00233497	0.0122716
arahy.FIQU4U	-2.90526	0.000312667	0.00243562
arahy.M1FH64	-2.90526	0.000312667	0.00243562
arahy.60QMTC	-2.90304	0.000121013	0.00112658
arahy.S6LFZW	-2.90251	0.00818413	0.0326514
arahy.BHH580	-2.90182	0.00144249	0.00833652
arahy.DB5XKD	-2.90076	9.68781e-05	0.0009417
arahy.QILJ1N	-2.90067	1.70941e-06	3.24983e-05
arahy.89BLSN	-2.90063	1.32815e-10	8.24423e-09
arahy.DV7T6I	-2.89803	0.000326807	0.00252488
arahy.QE7P9S	-2.89785	0.011877	0.0436468
arahy.T4QRY3	-2.89755	0.00188302	0.0103195
arahy.SY4M5M	-2.89681	3.35773e-05	0.000395005
arahy.VZVD9A	-2.89562	3.25357e-06	5.59839e-05
arahy.S9CKM7	-2.89107	0.00432349	0.0198436
arahy.4R2B5R	-2.89077	0.00226945	0.0119916
MSTRG.35098	-2.88776	6.81093e-06	0.000104275
arahy.4JXB6U	-2.88753	3.75331e-06	6.31779e-05
arahy.C255DP	-2.88536	0.00820689	0.0327151
arahy.8KGB21	-2.88273	0.00422307	0.0194693
arahy.L85FTG	-2.88261	1.12782e-07	3.16473e-06
arahy.PP2Z6E	-2.88207	2.50972e-10	1.46351e-08
arahy.DV6GD6	-2.88129	5.48916e-13	5.8007e-11
MSTRG.41140	-2.88101	0.00259246	0.0133203
arahy.84QHVJ	-2.88042	0.002242	0.0118737
arahy.DP9AR5	-2.87971	0.00234426	0.012313
arahy.EI09ZL	-2.87734	2.20033e-13	2.45074e-11
arahy.VH1KH4	-2.87168	0.0115331	0.0426468
arahy.5I47GQ	-2.87127	0.00249293	0.012937
arahy.YILV44	-2.87034	7.56979e-07	1.61485e-05
arahy.L4CNUE	-2.87016	0.000193264	0.00165055
arahy.NQW8T9	-2.86836	0.00205144	0.0110429
arahy.4RXH8Y	-2.86738	6.68287e-05	0.000696533
arahy.19SFKA	-2.86673	2.70397e-06	4.78769e-05
arahy.CC6LIU	-2.86279	0.000214196	0.00179298
MSTRG.46684	-2.8625	0.00672803	0.0280483
arahy.1EP8UK	-2.86204	0.000290432	0.00229459
arahy.4FF3SU	-2.86043	0.00215794	0.0115159
arahy.61UWXT	-2.85981	5.0316e-08	1.57063e-06
arahy.QT5RS9	-2.85976	0.00284655	0.0142994
arahy.BE9V1M	-2.85614	0.000761258	0.00496583
arahy.8V8U4B	-2.856	1.66312e-08	5.99982e-07
arahy.KBA53Y	-2.85573	5.9096e-06	9.25937e-05
arahy.23EIYW	-2.85488	5.54667e-07	1.23537e-05
arahy.D9IB2L	-2.8539	1.69608e-05	0.000222483
arahy.JTF09J	-2.8517	1.79832e-07	4.68526e-06
arahy.I9NQTG	-2.84956	1.1063e-06	2.22735e-05
arahy.NS3ZLY	-2.84893	7.15798e-07	1.53684e-05
arahy.7NQA48	-2.84699	0.00661314	0.0276812
arahy.0TX68Y	-2.84484	0.00013598	0.00123617
arahy.157ARR	-2.84311	4.17181e-07	9.74403e-06
MSTRG.35533	-2.84296	0.00012726	0.00117215
arahy.ZNHH9V	-2.84235	2.13924e-05	0.000271014
arahy.362ZE3	-2.84062	0.000549528	0.00384395
arahy.UC0Y85	-2.83954	5.29419e-05	0.000574891
arahy.E2TW3L	-2.83872	0.00069188	0.00461405
arahy.L4E7PU	-2.83871	3.79152e-06	6.3697e-05
arahy.X05KEZ	-2.83794	0.000760827	0.00496462
arahy.LMG1BG	-2.83724	5.17256e-05	0.000564228
arahy.0PF214	-2.83519	7.54949e-05	0.000768916
arahy.FIY7NK	-2.82997	2.58386e-08	8.78735e-07
arahy.TW4R6Z	-2.82597	0.0113675	0.0421463
arahy.VW08M3	-2.82422	3.43048e-11	2.40505e-09
arahy.H6YQSI	-2.82353	0.0007196	0.00474704
arahy.MI9HWR	-2.82244	1.63584e-07	4.32963e-06
[truncated: 6,055 more rows]

## Sheet: DEGs at stage S3
The differentially expressed genes between WT and spm at three stages
Gene ID	log2FC (spmS3/WTS3)	P-value	FDR
arahy.99J26D	-17.2025	2.25992e-32	2.04174e-29
arahy.VUY3N3	-16.7868	1.65983e-32	1.53291e-29
arahy.LEZM1J	-15.8927	1.77811e-19	4.86162e-17
arahy.774XMB	-15.8042	2.13213e-25	1.13602e-22
arahy.8ZA7SM	-15.5088	2.25032e-27	1.53313e-24
arahy.VA7IIE	-15.4602	1.85559e-19	5.04028e-17
arahy.C2E8GX	-15.3523	7.06207e-25	3.53606e-22
arahy.NG9QQJ	-15.2874	7.68541e-25	3.75762e-22
arahy.IT7G4I	-14.9124	3.65903e-22	1.38242e-19
arahy.050HUA	-14.6745	5.62902e-26	3.11915e-23
arahy.W8QXVR	-14.5912	2.51463e-25	1.32285e-22
arahy.EHU7FT	-14.39	1.44312e-22	5.87986e-20
arahy.D0Q561	-14.3142	3.53011e-22	1.35668e-19
arahy.Q9F21C	-14.3025	1.99068e-22	7.95487e-20
arahy.9QS057	-14.2766	2.27711e-20	7.33599e-18
arahy.3IU0NQ	-14.1771	1.21044e-15	1.98719e-13
arahy.U3WWWH	-14.1336	1.6073e-19	4.45318e-17
arahy.Z621FR	-14.1204	3.35725e-22	1.30396e-19
arahy.PSG53D	-14.0487	7.64476e-18	1.76505e-15
arahy.K57DW9	-13.8386	6.26677e-21	2.1174e-18
arahy.FN76PE	-13.8314	4.09376e-16	7.3333e-14
arahy.V2AJHY	-13.7506	2.14752e-20	6.97256e-18
arahy.08CHYH	-13.6984	2.19553e-19	5.88671e-17
arahy.S9C4R7	-13.6363	5.26292e-16	9.34709e-14
arahy.W6P66N	-13.5471	1.43762e-20	4.77967e-18
arahy.NFFY6G	-13.4814	2.5203e-20	8.05701e-18
arahy.HE6EBR	-13.4551	3.17458e-20	9.91974e-18
arahy.D859PH	-13.4534	2.35457e-18	5.68916e-16
arahy.JM79CB	-13.4226	5.57612e-20	1.63196e-17
arahy.VNIF6J	-13.3987	2.14855e-21	7.63175e-19
arahy.4WGD60	-13.3983	3.56657e-17	7.41116e-15
arahy.G51JN1	-13.392	3.95992e-21	1.36008e-18
arahy.XP046L	-13.359	1.62241e-18	3.98969e-16
arahy.FN6QZN	-13.3373	5.15068e-18	1.21623e-15
arahy.Y0EE8X	-13.3229	2.97268e-17	6.23947e-15
arahy.IH4GAK	-13.3172	8.93648e-18	2.02946e-15
arahy.GST58F	-13.313	2.04106e-19	5.50807e-17
arahy.KUDP7J	-13.3106	1.3776e-18	3.40783e-16
arahy.501GHP	-13.2959	8.4868e-10	5.24856e-08
arahy.IA3QS0	-13.2868	5.56319e-17	1.11691e-14
MSTRG.17235	-13.2713	3.5046e-11	2.83914e-09
arahy.UX4ERZ	-13.2636	3.74274e-38	4.44413e-35
arahy.66HKGP	-13.2472	6.1924e-19	1.57883e-16
MSTRG.16926	-13.2423	2.34302e-13	2.70483e-11
arahy.UQJP0C	-13.2137	4.52034e-16	8.06269e-14
arahy.0W4FI5	-13.169	5.20533e-17	1.05526e-14
arahy.U4LTZI	-13.1357	9.24616e-18	2.08838e-15
arahy.897SEY	-13.0532	5.42892e-22	2.03262e-19
MSTRG.17178	-13.0322	1.01286e-14	1.46666e-12
arahy.5T510H	-13.0113	7.49561e-17	1.49048e-14
arahy.NQ5KT7	-13.0073	2.16145e-14	2.93555e-12
arahy.A2XG10	-12.9908	2.19531e-17	4.7606e-15
arahy.286I7U	-12.9807	1.16348e-12	1.22014e-10
arahy.A0EQPQ	-12.9784	5.48422e-16	9.65757e-14
arahy.D1PG31	-12.947	7.1983e-13	7.73008e-11
arahy.V55W7Y	-12.9403	6.52612e-22	2.4216e-19
arahy.7PY5NM	-12.9163	2.6079e-17	5.55803e-15
MSTRG.17183	-12.8829	3.64388e-14	4.77716e-12
arahy.63YJK9	-12.8809	6.86869e-28	4.83824e-25
arahy.QU8WMY	-12.8044	4.55684e-12	4.29428e-10
arahy.29VQUK	-12.7882	2.58342e-15	4.00613e-13
arahy.9S9EKZ	-12.7807	1.75903e-20	5.80188e-18
arahy.4XHC1Q	-12.7433	4.46435e-15	6.69797e-13
arahy.W9SEAP	-12.7228	1.41827e-09	8.37241e-08
MSTRG.4285	-12.7114	1.84004e-11	1.56701e-09
arahy.NA36AX	-12.6933	1.20515e-12	1.25841e-10
arahy.YRI3HS	-12.6439	4.0366e-11	3.24482e-09
arahy.X8RB79	-12.6401	4.55477e-14	5.86043e-12
arahy.W4A4ZK	-12.6211	5.44335e-16	9.62639e-14
arahy.ADUU08	-12.5754	4.24206e-15	6.38753e-13
MSTRG.17088	-12.4495	2.53357e-10	1.77559e-08
arahy.FWH2UP	-12.4365	5.81178e-12	5.39133e-10
arahy.M33Y2K	-12.3889	6.14807e-14	7.71926e-12
arahy.8JC9PH	-12.3799	3.19388e-17	6.67008e-15
arahy.ZYX0UD	-12.3599	6.06758e-13	6.58388e-11
arahy.FR9H69	-12.32	1.90156e-14	2.60815e-12
arahy.1X7ZBM	-12.2963	1.27813e-14	1.80384e-12
arahy.YGS75T	-12.279	6.73689e-16	1.15694e-13
arahy.0B7PBW	-12.2742	1.24722e-14	1.7751e-12
arahy.YP8DRN	-12.2722	4.45847e-18	1.0588e-15
arahy.T192ZT	-12.2674	5.61873e-16	9.8527e-14
arahy.CPN596	-12.2674	3.00417e-09	1.648e-07
arahy.7J6N7U	-12.2477	4.83421e-17	9.8968e-15
arahy.A8NRAZ	-12.2147	1.06872e-12	1.13593e-10
arahy.9SPN5G	-12.2036	6.12645e-16	1.06979e-13
arahy.ICGL65	-12.1011	6.9136e-16	1.1824e-13
arahy.H2AKHM	-12.0645	1.33202e-14	1.87019e-12
arahy.46R0UG	-12.0442	2.7014e-11	2.23641e-09
arahy.W8BZZJ	-12.0327	2.45538e-15	3.83621e-13
arahy.SC2RCC	-11.9932	1.04301e-13	1.26007e-11
arahy.WTC06L	-11.9813	3.57399e-13	4.05824e-11
arahy.D2JYDS	-11.9549	1.90418e-16	3.63008e-14
arahy.P33UNN	-11.9243	5.73437e-12	5.33143e-10
arahy.V07PF1	-11.9206	2.03904e-16	3.81714e-14
arahy.D79Q71	-11.9031	4.69338e-15	7.01626e-13
arahy.NQRV4U	-11.893	2.29045e-14	3.08384e-12
arahy.7Z40J1	-11.8494	1.73355e-17	3.87337e-15
arahy.3CPC1Y	-11.8337	1.22545e-06	3.43647e-05
arahy.XW2FM5	-11.7922	8.07735e-19	2.03446e-16
arahy.2L7SHU	-11.7128	9.41045e-11	7.07213e-09
arahy.VUP14P	-11.7	1.25225e-22	5.20422e-20
arahy.DHKF98	-11.6999	5.3835e-13	5.90324e-11
arahy.L964KV	-11.697	1.28042e-14	1.80384e-12
arahy.1ZHN64	-11.6814	5.16922e-24	2.38697e-21
arahy.SPP5W5	-11.6303	9.40178e-16	1.56919e-13
arahy.RE1YA1	-11.6257	3.19891e-09	1.73556e-07
arahy.MX1HG7	-11.5051	1.08529e-12	1.1506e-10
arahy.391TM2	-11.4658	2.75456e-21	9.61989e-19
arahy.ZUU225	-11.4495	4.50769e-08	1.84927e-06
arahy.50YYNM	-11.3808	1.23275e-08	5.88871e-07
arahy.6PK8GH	-11.3406	5.65397e-14	7.14205e-12
arahy.YU9W9A	-11.3011	5.16371e-08	2.08033e-06
arahy.YJWL0V	-11.28	1.15605e-12	1.2194e-10
MSTRG.17240	-11.2722	7.62597e-09	3.81381e-07
arahy.61NS0W	-11.2328	8.43565e-10	5.2325e-08
MSTRG.44344	-11.2188	6.21689e-05	0.0010172
arahy.8AM4UR	-11.2107	2.31587e-09	1.32006e-07
arahy.QCX1RW	-11.1442	4.32361e-10	2.90753e-08
arahy.J9N3PQ	-11.1357	1.73033e-12	1.76252e-10
arahy.EZRH7V	-11.1357	8.46868e-08	3.22594e-06
arahy.QD1C5V	-11.0879	1.00256e-09	6.08252e-08
MSTRG.36374	-11.079	5.69479e-09	2.91465e-07
arahy.J4CCY6	-11.0316	9.99988e-09	4.90076e-07
MSTRG.44676	-11.0293	5.85303e-10	3.78888e-08
arahy.8R729R	-10.9342	2.52168e-13	2.89499e-11
arahy.CP8I5J	-10.9268	1.05128e-09	6.34108e-08
MSTRG.17110	-10.9243	1.04204e-06	2.97843e-05
arahy.FLE44X	-10.8688	1.15096e-10	8.52637e-09
arahy.R3ZIXT	-10.8611	3.41999e-08	1.45032e-06
MSTRG.49496	-10.8611	0.000104432	0.00156119
arahy.XZ7Y08	-10.8533	5.5918e-06	0.000127616
arahy.HMP3A6	-10.8252	2.20813e-35	2.35302e-32
arahy.E2W35F	-10.795	2.26233e-09	1.29149e-07
arahy.M75BKX	-10.7895	6.03611e-10	3.88922e-08
arahy.QUZ9E8	-10.7841	2.00501e-09	1.15411e-07
arahy.G8LUQ6	-10.7768	4.90588e-25	2.54854e-22
arahy.LCNF64	-10.7742	7.59327e-20	2.17634e-17
arahy.MYP9FH	-10.7731	2.60644e-10	1.82052e-08
arahy.YYC1CT	-10.7621	2.81488e-09	1.56395e-07
arahy.L75U5K	-10.7507	1.64736e-18	4.00366e-16
arahy.G9B5FS	-10.7285	6.69916e-06	0.000149442
arahy.4ZN8UM	-10.7257	1.58514e-10	1.14768e-08
arahy.2NZ4WG	-10.6647	1.09843e-13	1.31936e-11
MSTRG.17130	-10.6499	2.13131e-12	2.13949e-10
arahy.LZY6R0	-10.6012	0.00149459	0.0135976
arahy.6AD899	-10.5464	5.80007e-18	1.36184e-15
MSTRG.2771	-10.4952	7.08856e-05	0.00112958
arahy.QJLN12	-10.4925	5.00926e-255	2.0818e-250
arahy.NV60S8	-10.4751	5.74043e-07	1.77061e-05
arahy.6BEU00	-10.4443	8.32417e-09	4.13809e-07
arahy.RA2IS4	-10.4199	5.22921e-75	2.41468e-71
MSTRG.6966	-10.4023	0.00225791	0.0189914
MSTRG.41082	-10.3443	0.00441122	0.0320164
MSTRG.47988	-10.2954	0.00767945	0.0486065
arahy.I64K46	-10.2683	1.34661e-07	4.92204e-06
arahy.3A01UJ	-10.2644	0.000112299	0.00166087
arahy.T7DLBP	-10.2605	4.56503e-09	2.39543e-07
arahy.9PNN5C	-10.2288	7.09314e-05	0.00112987
arahy.F3FSDQ	-10.2086	3.88324e-08	1.61746e-06
arahy.H7AW2T	-10.1799	1.00138e-06	2.88004e-05
arahy.VAE62H	-10.1758	7.66735e-08	2.95044e-06
arahy.8WX4TX	-10.1621	5.73024e-32	5.06688e-29
arahy.3VK2QG	-10.125	5.18979e-10	3.4127e-08
arahy.L2M2QA	-10.1033	1.90694e-07	6.67092e-06
MSTRG.16972	-10.0864	2.63673e-17	5.59081e-15
MSTRG.3726	-10.0768	5.09113e-06	0.000116832
arahy.4IXQ36	-10.0453	0.000851744	0.0086674
arahy.XAZ3P8	-9.95613	2.75587e-06	6.91613e-05
arahy.0QS5M4	-9.95613	9.09145e-05	0.00139525
arahy.5WR99K	-9.93664	4.472e-07	1.42197e-05
arahy.I18LAP	-9.91551	9.61746e-16	1.59877e-13
MSTRG.37085	-9.90187	8.34081e-06	0.000180916
MSTRG.45345	-9.89684	0.00201571	0.0173044
arahy.F7HX5D	-9.86522	1.92969e-16	3.66191e-14
arahy.N6HXMD	-9.84025	9.87762e-09	4.84657e-07
arahy.L193ZY	-9.82972	0.00247811	0.0204017
MSTRG.46448	-9.82443	3.43954e-07	1.12821e-05
MSTRG.17152	-9.77039	8.04502e-05	0.00125551
MSTRG.23160	-9.72565	0.00349904	0.0269509
arahy.PQ7T65	-9.71296	7.25096e-17	1.44876e-14
arahy.RD60QW	-9.69116	2.45447e-09	1.38783e-07
arahy.RK7RJ4	-9.69116	2.03614e-07	7.06342e-06
arahy.ZR5QI2	-9.69058	4.19739e-20	1.26405e-17
arahy.733TCI	-9.6251	2.61376e-19	6.96315e-17
MSTRG.15758	-9.61961	0.00233791	0.0195102
arahy.U5T9YL	-9.61348	1.08895e-09	6.55881e-08
arahy.C4UQ0G	-9.60791	3.84019e-40	4.98733e-37
MSTRG.47074	-9.60733	0.00463985	0.0331889
MSTRG.27661	-9.60115	0.00606141	0.0405254
arahy.8U9H8D	-9.59166	3.00391e-15	4.60663e-13
arahy.5HMM9E	-9.51636	2.58313e-15	4.00613e-13
arahy.PYV8LV	-9.51422	1.30428e-15	2.11737e-13
arahy.77IXXA	-9.45806	3.64402e-06	8.7387e-05
arahy.H9G0X7	-9.45121	7.76813e-07	2.30597e-05
arahy.IR8W5V	-9.4023	0.000800833	0.00825032
arahy.IVJ6DK	-9.39232	1.67595e-14	2.32169e-12
arahy.86KBF0	-9.38802	9.66943e-10	5.90091e-08
MSTRG.47416	-9.38751	5.99266e-13	6.51961e-11
arahy.CQR159	-9.35931	5.60723e-15	8.35236e-13
arahy.38DL7I	-9.35168	0.000120927	0.00176584
arahy.HXSC09	-9.35168	0.00116875	0.0111302
arahy.PQR4B3	-9.33688	4.06756e-05	0.000702884
arahy.GYJ6B7	-9.31439	6.06293e-06	0.000137077
arahy.M7PLWR	-9.29921	3.96497e-06	9.38383e-05
arahy.5QJ4TD	-9.29309	6.09317e-30	4.68937e-27
arahy.WM4DMJ	-9.23761	1.07401e-19	3.03639e-17
arahy.YL00Q2	-9.22882	7.81459e-07	2.3181e-05
arahy.J42BJ7	-9.17159	0.000154318	0.00214996
arahy.WU2DYS	-9.14636	0.000181304	0.00245433
arahy.P3QKDQ	-9.12928	2.7404e-05	0.000499729
arahy.LLG5IK	-9.12699	6.82055e-34	6.59199e-31
arahy.90Y0GX	-9.06654	1.74295e-17	3.87355e-15
arahy.DIB8K4	-9.06407	6.82351e-14	8.51586e-12
arahy.Q60T31	-9.0348	2.17759e-08	9.81546e-07
arahy.BZI3ML	-9.02237	0.00309643	0.0244787
arahy.IRD816	-9.01123	2.78072e-14	3.71589e-12
arahy.BX0HUJ	-9.00375	0.00378345	0.0285471
arahy.SUKE0C	-8.99488	1.79391e-71	6.77756e-68
arahy.0FQ4XJ	-8.98489	0.00049648	0.00560533
arahy.ST4209	-8.97537	0.00493123	0.0346796
arahy.31R89H	-8.92679	4.13191e-06	9.74011e-05
arahy.C255DP	-8.92679	3.15978e-05	0.00056311
arahy.MFP8ME	-8.90689	0.00198061	0.0170524
arahy.I5363L	-8.90689	0.00656286	0.0429941
MSTRG.21750	-8.89461	5.03214e-09	2.6087e-07
arahy.29JE2Z	-8.88671	2.81253e-05	0.000508864
MSTRG.17125	-8.86908	2.07235e-13	2.41246e-11
arahy.6P6M09	-8.835	9.44225e-05	0.00143754
arahy.U65F6Q	-8.81378	0.000297496	0.00366547
arahy.XI9RPA	-8.73697	6.61205e-05	0.00106484
arahy.0PNZ7T	-8.73697	0.00129723	0.0120824
arahy.P86FK6	-8.71425	0.0046866	0.0334083
MSTRG.41334	-8.70687	0.00574424	0.0388423
arahy.6835ZM	-8.67948	7.37578e-06	0.000162702
arahy.XYSL2Y	-8.61701	8.12982e-50	1.46899e-46
arahy.1DU7LF	-8.58246	2.78707e-05	0.000505578
arahy.6Y279M	-8.55714	1.82458e-05	0.000352851
MSTRG.41716	-8.55714	0.000416728	0.00484713
arahy.8AJM88	-8.55714	0.00181485	0.0159121
arahy.B47NWK	-8.55714	0.00181485	0.0159121
arahy.6DHK77	-8.54998	1.16225e-12	1.22014e-10
arahy.T958MW	-8.50338	4.08148e-24	1.92752e-21
arahy.YRM394	-8.47843	0.00489105	0.0344898
arahy.W26F3T	-8.47032	1.89083e-15	3.01076e-13
arahy.UPL2TI	-8.46983	1.00309e-29	7.57955e-27
arahy.H2EMZS	-8.46489	6.39576e-05	0.00103707
arahy.VB7Q8H	-8.43741	0.00168379	0.0149555
arahy.55FLCK	-8.40339	1.34034e-42	1.85678e-39
arahy.E5BVVA	-8.17991	0.000357786	0.00426541
arahy.85NLUF	-8.16993	1.50152e-08	7.04307e-07
arahy.SS1ETW	-8.16742	2.38233e-11	1.9921e-09
arahy.N0HV1Z	-8.16323	0.00231232	0.0193395
arahy.8D5WLD	-7.94642	0.00260122	0.0212483
arahy.D7DDVZ	-7.92679	0.00711986	0.0457474
arahy.AT7H7M	-7.82443	0.00141032	0.0129557
arahy.VX1J70	-7.80025	3.0732e-16	5.6264e-14
arahy.CEWT6L	-7.73697	0.00619092	0.041153
arahy.BX0P1N	-7.69116	0.00565385	0.038406
arahy.FBZU85	-7.68007	8.06318e-14	9.91413e-12
arahy.I1E7E1	-7.64818	4.3376e-08	1.78653e-06
arahy.XMBW0J	-7.60881	3.53101e-10	2.40566e-08
arahy.VLR49I	-7.59495	0.00514024	0.0357588
arahy.JM24QG	-7.59495	0.00633374	0.0418214
arahy.1784RG	-7.58621	1.16556e-12	1.22014e-10
arahy.F5PR0Y	-7.5101	1.65715e-14	2.30333e-12
arahy.6AC8VA	-7.40514	4.09527e-08	1.69686e-06
arahy.K29MSX	-7.38082	0.00549364	0.0375263
MSTRG.15952	-7.37388	1.19902e-16	2.32851e-14
arahy.HUL940	-7.37069	3.35438e-10	2.30041e-08
arahy.R9H0NA	-7.37069	3.35438e-10	2.30041e-08
arahy.E0NQML	-7.34873	6.31915e-12	5.823e-10
arahy.Y5ZCTQ	-7.2555	3.81024e-17	7.83909e-15
arahy.LDXX7Q	-7.16323	0.00456008	0.0327706
arahy.Q6Q4B7	-7.14697	1.38409e-15	2.22952e-13
MSTRG.15951	-7.12825	4.05437e-08	1.68159e-06
MSTRG.26679	-7.02791	9.70739e-05	0.00147183
arahy.4I97V1	-6.9386	9.38413e-11	7.06513e-09
arahy.A4X5BJ	-6.90689	0.00460036	0.0329859
arahy.Y173KB	-6.82142	1.46822e-34	1.4528e-31
arahy.CPM77E	-6.80735	1.10529e-44	1.64052e-41
arahy.GRPT2Q	-6.78136	0.00703196	0.045372
arahy.5J98P8	-6.72034	4.3329e-06	0.00010162
arahy.LP3XDL	-6.70736	4.52839e-12	4.27717e-10
arahy.75Q1P4	-6.70506	1.43697e-12	1.47861e-10
arahy.I5F7FQ	-6.69116	0.00582696	0.0393058
arahy.D8JT6M	-6.56844	8.62215e-44	1.23561e-40
arahy.NCQ92W	-6.55902	1.42527e-72	5.9233e-69
arahy.N5DCQN	-6.53634	2.08796e-10	1.4884e-08
arahy.YP8KSB	-6.49185	5.94739e-06	0.000134917
arahy.G9VGRV	-6.36786	2.92755e-09	1.61412e-07
arahy.EV65WI	-6.31159	7.31077e-07	2.19371e-05
arahy.CW2GVZ	-6.25424	1.17608e-06	3.32495e-05
arahy.P271UT	-6.25109	2.40005e-08	1.06564e-06
arahy.DQ6KFY	-6.25046	6.99003e-11	5.41975e-09
MSTRG.48308	-6.1482	3.84655e-05	0.000671675
arahy.VFC9DI	-6.14338	9.61891e-22	3.5066e-19
arahy.AFL9DX	-6.09803	3.90006e-07	1.26233e-05
arahy.T4LF8L	-6.04002	3.45231e-19	9.08066e-17
arahy.PVM0SU	-6.03386	6.70863e-16	1.15686e-13
arahy.ZYZ79R	-5.97491	1.07486e-102	8.93398e-99
arahy.GBJ2WV	-5.96621	6.81993e-07	2.07034e-05
arahy.8LD30U	-5.92481	0.000329043	0.00397563
arahy.0NG64P	-5.90689	9.67124e-06	0.000206434
arahy.YAY0HW	-5.82018	0.000205412	0.00271697
arahy.04JW1L	-5.80934	8.54181e-17	1.68241e-14
arahy.57F5XX	-5.7488	3.59985e-20	1.11481e-17
MSTRG.30127	-5.73245	1.31247e-05	0.000267771
arahy.N8QUMN	-5.73039	4.19913e-10	2.83564e-08
arahy.FG3B3X	-5.72198	9.15933e-23	3.84497e-20
arahy.E110XT	-5.6893	0.000236607	0.00304055
arahy.I1VY18	-5.65671	1.38641e-60	4.11556e-57
arahy.RL3IDB	-5.61891	5.51264e-06	0.000125879
MSTRG.32647	-5.61765	0.000167241	0.00230145
arahy.I67UCX	-5.58135	2.1409e-06	5.58529e-05
arahy.BNP26P	-5.54713	1.45212e-26	8.62123e-24
arahy.K1N414	-5.53101	5.41878e-17	1.0932e-14
MSTRG.29403	-5.49476	0.000129088	0.00186212
arahy.MJC5Q8	-5.4255	8.84536e-22	3.25313e-19
arahy.YN8IJ2	-5.41181	1.01251e-14	1.46666e-12
arahy.R2LLHR	-5.35755	8.12027e-15	1.18828e-12
arahy.PSWV5K	-5.35755	0.000292759	0.00361675
arahy.U9954S	-5.31206	0.000210797	0.00276916
arahy.206RCI	-5.2647	0.000190833	0.00255998
MSTRG.40356	-5.18417	0.0010217	0.0100168
arahy.LGWD6U	-5.12928	1.67482e-05	0.000329252
arahy.WZE4UT	-5.1127	0.00177067	0.0156103
arahy.JJV6C7	-5.10852	0.000532574	0.00592709
MSTRG.20661	-5.10434	0.00148621	0.0135331
arahy.2A63GV	-5.09091	1.94481e-07	6.78057e-06
arahy.X4UCF1	-5.08307	0.00015916	0.00220632
arahy.DY9XI0	-5.05889	0.00109118	0.0105437
MSTRG.34412	-5.05813	0.000662029	0.00706856
arahy.DLQI02	-5.04439	0.000314338	0.00383119
MSTRG.19270	-5.04002	1.82028e-05	0.000352217
arahy.IVRK3W	-5.00749	1.85437e-05	0.000357116
arahy.9UEQ51	-4.99713	2.15625e-46	3.31895e-43
arahy.YNET3T	-4.99464	8.94455e-12	8.05382e-10
arahy.1Q0IUD	-4.94503	7.89911e-24	3.56825e-21
arahy.4RY61R	-4.93265	1.71873e-76	8.92861e-73
arahy.F1CH2T	-4.9241	1.01164e-06	2.9035e-05
arahy.EE5UNB	-4.89106	2.17049e-22	8.5908e-20
arahy.YM61N8	-4.87518	0.000179506	0.00243555
arahy.E2679H	-4.85798	0.00270591	0.0219162
arahy.27E6QC	-4.82738	2.5621e-05	0.00047156
arahy.G3I7YY	-4.81378	0.00164411	0.0146752
MSTRG.37168	-4.79448	8.04504e-16	1.36467e-13
arahy.N05MPS	-4.78136	0.0044171	0.0320535
arahy.F5KWPZ	-4.75183	2.07285e-50	4.30727e-47
arahy.D10I8V	-4.7261	0.00383728	0.0288118
arahy.VTM76V	-4.71882	0.00110615	0.0106536
arahy.LIG7UX	-4.71665	1.10334e-78	6.5505e-75
arahy.V0RRMI	-4.71256	4.82471e-08	1.95811e-06
MSTRG.5200	-4.70044	2.43206e-05	0.000450619
arahy.CFM630	-4.65662	0.000243708	0.00312212
arahy.AZ5764	-4.64386	3.37508e-06	8.19305e-05
arahy.W2HKS7	-4.6053	3.20329e-21	1.10938e-18
arahy.M9HV3F	-4.60382	0.00247019	0.0203445
arahy.4LL9T6	-4.59825	1.25004e-08	5.96445e-07
MSTRG.28691	-4.59495	7.69551e-06	0.000168948
arahy.ET89BN	-4.58496	0.00100505	0.00989311
MSTRG.43170	-4.57399	0.00184071	0.0160778
arahy.3NB7SA	-4.56886	2.82781e-186	3.91737e-182
arahy.RLCT0M	-4.55781	1.63848e-18	4.00366e-16
MSTRG.31512	-4.54432	0.00555623	0.0378684
MSTRG.36475	-4.52007	0.00445983	0.0322397
arahy.53J40D	-4.50309	3.67982e-48	6.11718e-45
arahy.UM2SQV	-4.48408	2.29905e-62	7.3497e-59
arahy.VE1P60	-4.39917	0.00166812	0.0148322
arahy.858FVG	-4.39482	5.60137e-83	3.87979e-79
MSTRG.17038	-4.37402	9.82753e-15	1.43306e-12
arahy.Q0W2B6	-4.33787	0.000534077	0.00593944
arahy.4B7F2K	-4.27798	0.00226556	0.0190403
arahy.6IG7E5	-4.27798	0.00226556	0.0190403
arahy.RQ5XX8	-4.2699	1.90153e-252	3.95129e-248
arahy.H81X9C	-4.26849	2.92577e-05	0.000525917
arahy.TZP4F0	-4.26679	0.0057333	0.0387873
arahy.WV7YAP	-4.26127	6.77096e-05	0.00108772
arahy.0BZR9P	-4.25791	1.57791e-19	4.40109e-17
arahy.32PDNQ	-4.25791	1.57791e-19	4.40109e-17
arahy.6A53IY	-4.25334	5.33266e-08	2.13713e-06
arahy.9KNF1J	-4.24793	0.00161618	0.0144756
arahy.B4CUFV	-4.24793	2.47092e-10	1.74049e-08
arahy.41W2JL	-4.24249	0.000111228	0.00164562
arahy.IGV1QM	-4.2362	8.24435e-06	0.000179386
arahy.7U9B70	-4.22929	2.92794e-06	7.25595e-05
arahy.YD7G6D	-4.21917	0.0007351	0.00769522
arahy.YMSH9Z	-4.20555	0.000274328	0.00342675
arahy.D4MEDX	-4.19804	2.18802e-49	3.78883e-46
arahy.2IJU75	-4.18763	2.08582e-07	7.19971e-06
arahy.BYTU3P	-4.17991	0.000164214	0.00226655
arahy.AGD9YF	-4.17873	2.50248e-05	0.000461814
arahy.HMY8CZ	-4.1592	2.2929e-14	3.08384e-12
arahy.S6ZM1I	-4.15735	7.98833e-18	1.83418e-15
arahy.F5G8NI	-4.14296	0.00681171	0.0442671
arahy.HCI8A4	-4.09954	0.000127404	0.00184358
arahy.XVX6ST	-4.09374	0.000277586	0.00346433
arahy.WQ3Q24	-4.08746	0.00642541	0.0422455
MSTRG.16359	-4.07619	0.00141334	0.0129777
arahy.H5FPK5	-4.07039	0.00458981	0.0329333
arahy.W56MR2	-4.05011	5.2299e-40	6.58634e-37
arahy.TQHX8C	-4.04803	6.81186e-08	2.65318e-06
MSTRG.9149	-3.99528	3.28165e-08	1.40023e-06
arahy.3TM8QD	-3.99247	0.00350669	0.0269929
arahy.A2E6KE	-3.98489	0.000218685	0.00285438
MSTRG.27872	-3.959	0.00204738	0.0175257
MSTRG.31044	-3.94753	0.00234201	0.0195288
arahy.833Q1J	-3.94486	1.86485e-05	0.00035847
MSTRG.17167	-3.92945	3.57268e-05	0.000627279
arahy.23GIHT	-3.89966	3.19044e-11	2.60494e-09
arahy.G2WE73	-3.89077	0.00492281	0.0346405
arahy.1U7IT4	-3.87915	3.3074e-12	3.22658e-10
arahy.F06MSU	-3.87447	0.00105643	0.0102869
MSTRG.20670	-3.87072	1.58299e-06	4.29141e-05
arahy.80GNXC	-3.86876	2.87174e-16	5.30429e-14
arahy.S3A1K2	-3.86041	3.27367e-63	1.13375e-59
arahy.7A0A2P	-3.85926	1.44103e-51	3.32711e-48
arahy.GQ1BIK	-3.85244	0.00443519	0.0321342
arahy.6U5FSP	-3.83551	0.00135263	0.0125114
MSTRG.47674	-3.82782	0.00559289	0.038076
arahy.11EUX6	-3.822	4.46656e-13	4.96325e-11
arahy.056HEM	-3.81754	5.72758e-20	1.66456e-17
arahy.M4G7E6	-3.81203	3.7935e-07	1.23264e-05
arahy.EVN2AK	-3.79941	0.00559332	0.038076
MSTRG.18825	-3.79725	6.13929e-13	6.64434e-11
arahy.73MM12	-3.77932	6.56149e-42	8.79642e-39
arahy.CT4LS7	-3.77591	0.000659854	0.00704777
arahy.6LQ9DQ	-3.74953	5.59477e-08	2.23141e-06
arahy.YD7UU4	-3.74741	3.76674e-06	8.98634e-05
arahy.B2S0ZF	-3.7294	0.000392486	0.00461424
arahy.M42AW0	-3.7294	0.000392486	0.00461424
MSTRG.16824	-3.68907	6.35816e-09	3.22636e-07
MSTRG.16388	-3.6806	0.00548051	0.0374508
arahy.B65H15	-3.67129	2.1188e-06	5.54854e-05
arahy.7UA83Q	-3.64909	0.00597399	0.040104
arahy.BFG4SY	-3.62803	0.000133125	0.00191041
MSTRG.32782	-3.60768	0.0030842	0.0243959
arahy.F4PGJ6	-3.6059	2.19469e-13	2.54774e-11
arahy.E8SXRQ	-3.58674	1.8295e-13	2.16e-11
arahy.L78ELK	-3.58196	5.0013e-104	5.19623e-100
arahy.TT82BA	-3.5724	0.0037085	0.0281346
arahy.M6NE4G	-3.55938	3.31058e-10	2.27789e-08
arahy.0QE1FA	-3.55695	0.00498347	0.0349314
arahy.RKT5P3	-3.55695	0.00498347	0.0349314
arahy.Q9SDJ5	-3.55475	4.13923e-07	1.33041e-05
arahy.5YG8M2	-3.55325	0.000435171	0.00501255
arahy.Z5DDPN	-3.53681	3.20764e-05	0.000571171
arahy.4BCY92	-3.5325	0.00136297	0.0125903
arahy.GN6H4S	-3.52356	0.000978063	0.00966642
arahy.1K6RTV	-3.51349	8.10922e-11	6.17236e-09
MSTRG.26911	-3.5116	9.08354e-06	0.000194891
arahy.6BVJ0B	-3.5077	2.71214e-10	1.89117e-08
arahy.NIM4HJ	-3.48899	1.27413e-25	6.87681e-23
arahy.4SWV4Y	-3.48225	0.00319048	0.0250744
arahy.CM231P	-3.47345	1.42873e-11	1.23959e-09
arahy.KU7V2S	-3.46533	1.39454e-24	6.66155e-22
arahy.XSVY15	-3.46323	5.07058e-06	0.000116553
arahy.9HBV2U	-3.45943	4.91201e-06	0.000113536
arahy.5D0YLS	-3.4567	0.00013115	0.0018899
arahy.BF69ZZ	-3.45603	1.48238e-22	5.9812e-20
arahy.FNG8N4	-3.44829	1.32977e-20	4.45675e-18
arahy.Y0RSJ9	-3.42172	1.54323e-38	1.88633e-35
arahy.W9EH6H	-3.41983	0.001191	0.0112714
arahy.M9AABA	-3.41797	5.14137e-23	2.20279e-20
arahy.6Q8RNL	-3.40372	0.0075971	0.0482552
arahy.JH251T	-3.4001	5.38302e-31	4.47426e-28
arahy.WFL2XE	-3.39397	2.6581e-27	1.78174e-24
arahy.JCMX0M	-3.38119	2.38763e-08	1.06139e-06
arahy.UA577I	-3.3535	6.80549e-09	3.42935e-07
arahy.HSP4SF	-3.33915	4.90507e-27	3.04253e-24
arahy.3ZDQ4J	-3.3373	2.87042e-06	7.13042e-05
arahy.ZN14GH	-3.33298	3.83909e-11	3.10406e-09
arahy.WNQW91	-3.32849	2.9099e-27	1.8605e-24
arahy.ZD0NI5	-3.32849	2.9099e-27	1.8605e-24
arahy.3263BZ	-3.32636	2.74178e-09	1.52742e-07
arahy.ZVRF07	-3.31381	6.11565e-14	7.70183e-12
arahy.6JCP40	-3.29903	2.19581e-50	4.34552e-47
arahy.0VZ5ZP	-3.29866	2.09321e-07	7.21924e-06
arahy.PGK53K	-3.29825	0.000398184	0.00467016
arahy.XHN02S	-3.28951	0.00684378	0.0444199
arahy.PQNB6A	-3.27798	0.00161723	0.0144788
arahy.06HSAJ	-3.26707	1.59348e-14	2.22227e-12
arahy.Z3D5KE	-3.26078	1.9776e-47	3.16104e-44
arahy.G34P0I	-3.25873	0.00230458	0.0192903
arahy.XR04TG	-3.25802	0.00596068	0.0400388
arahy.773MH2	-3.24793	3.15394e-05	0.000562311
arahy.33GA7I	-3.24793	0.000100326	0.00151454
arahy.2XVM9C	-3.24393	7.1813e-06	0.000159025
arahy.WT21TW	-3.24327	6.71261e-12	6.17189e-10
arahy.MB81X2	-3.24317	5.44749e-06	0.000124597
arahy.UU0CZS	-3.23829	1.05386e-05	0.000221758
arahy.TBF9KP	-3.23704	0.00399308	0.0296689
arahy.MC3R00	-3.2362	0.000548255	0.00606144
arahy.1A1ACU	-3.21826	7.04698e-09	3.54559e-07
arahy.YBIH8U	-3.21071	5.81107e-05	0.000957962
MSTRG.35526	-3.21057	0.00360981	0.0275925
arahy.X8CB50	-3.20945	0.000418194	0.00485992
MSTRG.24733	-3.20765	2.57883e-07	8.70621e-06
arahy.H0U1UD	-3.2069	1.30958e-09	7.78609e-08
arahy.J6ELEK	-3.19569	7.62085e-08	2.93526e-06
arahy.MXED03	-3.18982	0.000452688	0.00518557
arahy.DA0PX7	-3.1883	5.53347e-08	2.21097e-06
arahy.HBWS59	-3.18442	0.000623663	0.00673902
arahy.1CC5AH	-3.18157	2.89334e-27	1.8605e-24
arahy.TT6QCG	-3.17616	9.87721e-25	4.7731e-22
MSTRG.19128	-3.16787	2.97544e-05	0.000533922
MSTRG.43080	-3.16776	8.25857e-24	3.69052e-21
arahy.BRNL8L	-3.15754	4.50502e-12	4.26478e-10
arahy.SXMW95	-3.14917	2.3879e-12	2.39129e-10
arahy.VRM8BV	-3.1369	0.00108616	0.0105074
arahy.IXM19M	-3.13578	0.00670871	0.0437344
arahy.6TFR0H	-3.13209	5.08655e-06	0.000116791
arahy.Y6Q89P	-3.12928	6.95431e-07	2.10192e-05
arahy.ZL8YIT	-3.12928	0.000143848	0.00203201
arahy.VC24MJ	-3.12732	7.57948e-05	0.00119543
arahy.F4L2T1	-3.11974	4.6957e-10	3.14249e-08
arahy.M043T1	-3.11818	3.77414e-50	7.12952e-47
arahy.32S0SQ	-3.11548	0.00653471	0.0428286
MSTRG.46840	-3.1075	6.61311e-05	0.00106484
arahy.0IQ56K	-3.09954	1.08906e-13	1.31189e-11
arahy.1CGI2P	-3.09673	2.58819e-05	0.000475731
arahy.K9F3KZ	-3.08746	0.000395391	0.00464444
arahy.UVB7JS	-3.07635	0.00740962	0.047273
arahy.JIZ31U	-3.06514	1.1137e-15	1.83668e-13
arahy.5C9IB2	-3.06178	0.00324476	0.0254097
arahy.WSM0H5	-3.0592	0.000167994	0.00230798
arahy.CMRQ0D	-3.05764	9.76314e-05	0.00147975
arahy.V2EIWI	-3.05528	0.00397112	0.0295551
arahy.BHH580	-3.04836	9.14313e-07	2.67215e-05
arahy.K5EF2U	-3.04401	0.000329078	0.00397563
arahy.WAA9CW	-3.04103	0.000385488	0.004549
arahy.PCT7KU	-3.03984	2.99636e-20	9.43376e-18
arahy.MIA0YM	-3.03868	0.000582007	0.00636349
arahy.Y5HWJY	-3.02905	2.79326e-08	1.21428e-06
arahy.9IJ3ID	-3.0287	0.000256821	0.00325106
arahy.VZ3VQN	-3.02738	5.7517e-06	0.000130835
arahy.J4S87V	-3.02583	7.24651e-27	4.3646e-24
arahy.AC8RV3	-3.02333	0.00124918	0.0117136
arahy.VR5W34	-3.01381	0.00145001	0.0132588
arahy.CTTM8W	-3.00279	1.47406e-13	1.76543e-11
arahy.6154V7	-3.0018	0.00198834	0.0170942
arahy.YW4YDB	-2.99463	0.000917012	0.00917432
arahy.EHR7LK	-2.99302	7.18943e-07	2.16746e-05
arahy.HLI3FT	-2.99236	3.88418e-08	1.61746e-06
MSTRG.19447	-2.9906	0.0052453	0.0362711
arahy.N934SC	-2.98898	1.79683e-05	0.000348782
arahy.80IGKV	-2.96907	1.74699e-09	1.01828e-07
arahy.CCFX3U	-2.96829	0.000455689	0.00521708
arahy.2I2XLP	-2.96083	0.0036133	0.027609
arahy.W6TWEB	-2.95842	0.00697262	0.0450801
arahy.2BY84C	-2.95719	1.87269e-10	1.34185e-08
arahy.P5P8C7	-2.95217	0.00485597	0.0342921
arahy.PE90UA	-2.95051	3.3357e-16	6.00123e-14
arahy.WY8677	-2.94769	1.24408e-12	1.29581e-10
arahy.0UI4ZV	-2.9386	0.00152879	0.0138421
arahy.T12MMD	-2.9386	0.0029688	0.0236542
MSTRG.13719	-2.93725	1.21453e-15	1.98719e-13
arahy.BAUA8N	-2.92992	0.00480164	0.0340183
arahy.ZLZ7ZM	-2.91816	6.75227e-07	2.0528e-05
arahy.BSZ7N6	-2.9169	7.72079e-07	2.29355e-05
arahy.6374NN	-2.91427	0.000308544	0.00377307
arahy.5H31LD	-2.91288	3.04328e-53	8.43172e-50
arahy.ISB7YF	-2.91222	0.00483282	0.0341693
arahy.AX22IR	-2.90397	0.00233115	0.0194616
arahy.8B51UP	-2.9001	0.007424	0.0473502
arahy.FZM120	-2.8887	2.24001e-07	7.67456e-06
arahy.N96YDH	-2.88716	1.75116e-29	1.29958e-26
arahy.01D1MQ	-2.87915	1.64104e-11	1.41788e-09
arahy.DYU645	-2.87774	5.19516e-05	0.000871641
arahy.DU5DWV	-2.87355	1.02704e-50	2.24645e-47
MSTRG.48902	-2.8618	0.000614484	0.00665382
arahy.0MAX30	-2.85986	0.00029213	0.00361114
MSTRG.13288	-2.85449	2.90351e-08	1.25695e-06
MSTRG.25219	-2.84187	0.00543712	0.0371952
arahy.0HHX3D	-2.83478	0.000623842	0.00673902
arahy.7T1TWK	-2.83475	4.69387e-19	1.21163e-16
arahy.QIC2C7	-2.83475	4.69387e-19	1.21163e-16
MSTRG.40115	-2.83351	9.95034e-07	2.86376e-05
arahy.52QCLV	-2.83185	7.02544e-19	1.78031e-16
arahy.74J18E	-2.8305	6.53803e-23	2.77259e-20
arahy.E5WGR0	-2.82552	0.00014283	0.00202107
arahy.R60S0X	-2.81623	3.25846e-06	7.97734e-05
arahy.YT5F2Q	-2.81307	4.3523e-07	1.38709e-05
arahy.0PE7XW	-2.81189	3.34874e-15	5.11655e-13
arahy.BMYY0J	-2.79256	0.00437959	0.0318424
arahy.C0K8ID	-2.7841	3.22602e-12	3.1546e-10
MSTRG.45667	-2.77335	0.0033452	0.0260245
arahy.8AEA8E	-2.76783	0.00136013	0.0125669
arahy.2N4YKD	-2.76302	1.10096e-08	5.31956e-07
arahy.0V89VS	-2.7604	1.49548e-06	4.0808e-05
MSTRG.16005	-2.75785	0.0046784	0.0333619
arahy.R1FZ8C	-2.75761	7.88368e-14	9.75113e-12
arahy.FVW9RW	-2.75598	2.89211e-05	0.000520617
arahy.KFLF6K	-2.7528	5.47201e-05	0.000911103
arahy.R8R3SK	-2.7528	5.47201e-05	0.000911103
arahy.6766IL	-2.74624	0.00635425	0.0419203
arahy.GW438E	-2.74475	1.32351e-10	9.7008e-09
arahy.LW385E	-2.74416	3.04604e-07	1.01508e-05
arahy.X2IQ10	-2.74339	0.00383143	0.0287796
arahy.64XMNP	-2.74147	0.00125832	0.0117834
arahy.ICU8XT	-2.73954	6.76738e-06	0.000150802
arahy.S57KMF	-2.73891	3.12121e-16	5.66439e-14
MSTRG.18536	-2.73791	0.00013273	0.00190738
arahy.U2FJ6Y	-2.73697	0.000373564	0.00443317
arahy.D0QZQ6	-2.7349	1.34856e-06	3.74382e-05
arahy.HF3ML2	-2.7291	0.000172965	0.00236239
arahy.ZWAD2N	-2.72583	0.00217375	0.0184177
arahy.X4FXIQ	-2.72583	0.00371641	0.0281792
arahy.6J1K9T	-2.72583	0.00451857	0.0325567
arahy.FUEI9J	-2.72479	0.000183541	0.00247978
arahy.H47VCY	-2.72215	2.96743e-52	7.70771e-49
arahy.2NR2PL	-2.72016	0.00419919	0.0308165
arahy.KF1DHC	-2.71425	9.50791e-07	2.76584e-05
arahy.5R195S	-2.71379	0.000326785	0.00395713
arahy.I3116U	-2.7121	9.17594e-12	8.23635e-10
arahy.A9DUZ3	-2.69116	0.00629729	0.0416933
arahy.H8X8VQ	-2.68424	1.43089e-06	3.93557e-05
arahy.60A6T2	-2.68137	0.00386224	0.0289626
arahy.Q6MIXV	-2.68012	4.03336e-06	9.52941e-05
arahy.R2BA1I	-2.67948	0.00201893	0.0173178
arahy.Y5BWXR	-2.67409	0.00675193	0.0439818
arahy.34QMY0	-2.67309	0.00337523	0.0262091
arahy.CT9XRW	-2.67287	2.84501e-13	3.25718e-11
arahy.P7SNS1	-2.67217	5.47443e-35	5.6878e-32
arahy.FBA9Q8	-2.66297	0.000473608	0.00538366
arahy.V2FEV8	-2.66297	0.000473608	0.00538366
arahy.V74ULR	-2.65838	0.000900296	0.00904409
MSTRG.5436	-2.65348	2.19169e-06	5.69634e-05
arahy.IKG909	-2.6495	4.85208e-05	0.000821376
arahy.Q6RBV6	-2.64909	0.000356625	0.00425524
arahy.TVP250	-2.64386	0.00243799	0.0201432
arahy.NQ9BEQ	-2.64357	0.00363499	0.0277187
MSTRG.42031	-2.64302	0.00197252	0.0170004
arahy.J8Y94D	-2.64053	3.43143e-15	5.22369e-13
MSTRG.47764	-2.63904	0.000391951	0.00461317
arahy.2IUT9R	-2.63361	3.94433e-11	3.17679e-09
arahy.U7WVQR	-2.6329	2.19822e-09	1.2582e-07
arahy.XXR9N9	-2.63227	0.000294905	0.00363894
arahy.PHK9QW	-2.62449	9.14342e-11	6.8964e-09
arahy.L2DLAE	-2.61143	0.0019439	0.0167885
MSTRG.5106	-2.61032	0.000571043	0.00626158
arahy.CG1IFF	-2.60606	0.000863684	0.00875246
arahy.80WNUL	-2.59885	2.43937e-09	1.38117e-07
arahy.K2YLLD	-2.59829	8.79217e-06	0.00018952
arahy.JGYC2J	-2.59329	0.00113541	0.0108775
arahy.TN1PNA	-2.59254	2.21898e-16	4.1169e-14
arahy.JN3EDT	-2.59249	6.89549e-10	4.36179e-08
arahy.0MQH7X	-2.58646	2.17828e-06	5.67568e-05
arahy.0T426R	-2.58589	2.65127e-06	6.69404e-05
arahy.6M6V4C	-2.58496	0.00343579	0.0265949
arahy.R4ID1P	-2.57469	3.52555e-08	1.4875e-06
arahy.I3NIKD	-2.56726	0.000106653	0.00158924
arahy.3BRQ4W	-2.56666	3.82275e-10	2.59591e-08
arahy.E0TF04	-2.56202	2.45829e-09	1.3881e-07
MSTRG.16289	-2.56172	0.000544108	0.0060268
arahy.B4MRFB	-2.56071	1.3449e-08	6.3659e-07
arahy.FHKG10	-2.54482	4.51205e-08	1.84927e-06
arahy.WQ3KQR	-2.54415	4.90728e-11	3.91442e-09
arahy.8PHP50	-2.54057	2.98599e-05	0.000535352
arahy.6E8E03	-2.53542	8.68832e-14	1.05578e-11
MSTRG.36697	-2.5331	0.00120667	0.0113972
arahy.Y1617F	-2.53268	2.85785e-06	7.10768e-05
arahy.5HY3IZ	-2.52756	1.12919e-06	3.20109e-05
arahy.NH5DW8	-2.51728	0.00791137	0.049635
arahy.RR2QSI	-2.51545	0.0056565	0.0384075
arahy.U9Q9TP	-2.51545	0.0056565	0.0384075
arahy.2S9XG1	-2.51	9.30213e-06	0.000199169
arahy.Y7RZ17	-2.50909	4.07693e-26	2.28964e-23
arahy.6EEF97	-2.50288	1.69006e-10	1.21518e-08
arahy.GM7J7I	-2.48976	2.71927e-06	6.83666e-05
arahy.PPR7D4	-2.4876	2.19937e-17	4.7606e-15
arahy.U0N14A	-2.48325	1.96949e-05	0.000376149
arahy.5V07QU	-2.48299	2.6026e-22	1.02039e-19
arahy.BAIH62	-2.48165	2.97911e-07	9.9605e-06
arahy.T6LAIA	-2.47969	0.00111321	0.0107068
arahy.BSVD5H	-2.47865	4.17143e-06	9.82393e-05
arahy.58GIJL	-2.47854	3.74227e-13	4.23774e-11
arahy.3X1J6L	-2.47805	0.00304968	0.024189
arahy.TC1G7F	-2.47626	7.5429e-06	0.000165948
arahy.G9C3B0	-2.47524	6.64235e-06	0.000148591
arahy.ERFU6K	-2.47508	1.3612e-06	3.77178e-05
arahy.29NKFC	-2.47508	4.26622e-05	0.00073325
arahy.JK7EPH	-2.47489	7.53633e-25	3.7286e-22
arahy.0XPL30	-2.47483	2.77444e-05	0.000504166
arahy.8138Y0	-2.47131	0.00589483	0.0396605
arahy.FECU6Q	-2.45943	1.6665e-08	7.7297e-07
arahy.Y7SRIQ	-2.45943	0.00116876	0.0111302
arahy.944YYF	-2.45943	0.00379294	0.0285874
arahy.57Z9Z9	-2.45943	0.00442379	0.0320852
arahy.7E0N0H	-2.45328	5.27876e-12	4.94099e-10
arahy.RY5C40	-2.44955	2.49061e-18	5.98308e-16
arahy.AIGQ5R	-2.44912	2.06645e-15	3.25301e-13
arahy.DM09BN	-2.44701	8.05161e-06	0.000175603
arahy.DED7QQ	-2.43582	0.000132141	0.00190158
arahy.52F34X	-2.43522	0.00214436	0.0182133
arahy.NZM2IS	-2.43185	3.70006e-06	8.85777e-05
arahy.DQCW8K	-2.43116	0.000766547	0.00796423
arahy.X6RF7Y	-2.43116	0.000766547	0.00796423
arahy.YP3YKY	-2.42884	0.000146622	0.00206349
arahy.A449FX	-2.42318	6.04007e-12	5.57821e-10
arahy.NDAY03	-2.42198	0.000299467	0.00368539
MSTRG.44845	-2.41885	0.0057964	0.0391315
arahy.7MW9BK	-2.41674	0.00456487	0.0327993
arahy.US0JF3	-2.4133	0.00139762	0.0128538
arahy.TUUC7L	-2.41143	0.000545345	0.00603546
arahy.Y81JPB	-2.41061	2.47488e-11	2.06119e-09
arahy.S7LJ0Z	-2.40991	1.01138e-05	0.000214887
MSTRG.7807	-2.40962	8.46635e-05	0.00131485
arahy.SPZ2MT	-2.40766	0.000232438	0.00299644
arahy.Q65WP5	-2.40185	8.80299e-16	1.47762e-13
arahy.TLHP2Z	-2.40125	8.10322e-05	0.00126317
arahy.T6ZY4C	-2.40073	2.223e-05	0.000418034
MSTRG.39605	-2.399	0.0018834	0.0163715
arahy.338KFG	-2.39899	0.0010427	0.0101985
arahy.5HZ0SA	-2.39838	1.89787e-17	4.1954e-15
arahy.HB12LR	-2.39788	0.000310264	0.00378797
arahy.HP76IN	-2.39232	0.00705173	0.0454713
arahy.KG38KX	-2.39217	4.03963e-07	1.30243e-05
arahy.7BH383	-2.38904	0.00470953	0.0335315
arahy.QEK7F9	-2.38612	2.41219e-07	8.19689e-06
arahy.M4TVLK	-2.38333	0.000389216	0.00458878
arahy.PZ4M2K	-2.38171	4.98423e-11	3.96819e-09
arahy.63SYA1	-2.38163	1.2432e-06	3.4792e-05
arahy.ZBJ4Q7	-2.38119	3.52304e-09	1.88922e-07
arahy.JQ1G2Q	-2.37621	0.00107513	0.0104249
arahy.U6GJ7E	-2.37454	3.23898e-06	7.93684e-05
arahy.E1KG5K	-2.37375	1.98722e-33	1.87698e-30
arahy.0MP31D	-2.37275	6.29794e-10	4.02671e-08
arahy.B5JY05	-2.37223	5.98264e-07	1.83584e-05
arahy.IE6UM0	-2.36984	0.00176309	0.0155568
arahy.Q6EFFR	-2.36826	7.98494e-10	4.97521e-08
arahy.9H79HM	-2.35496	0.00365884	0.0278663
arahy.C1I278	-2.35364	4.39352e-05	0.00075295
arahy.FJ2B1F	-2.34136	0.000876783	0.0088486
arahy.Y5YFYC	-2.34042	0.00250844	0.0206187
arahy.HZ0MGW	-2.33628	0.000555706	0.00612102
arahy.PU29YL	-2.32925	5.03096e-23	2.17793e-20
arahy.KTTP1X	-2.32716	4.56519e-07	1.44718e-05
arahy.FW3KJF	-2.32673	9.86074e-06	0.000210263
MSTRG.25403	-2.32193	0.00109424	0.0105609
arahy.G0QKVL	-2.32193	0.000430979	0.00497945
arahy.M5AIDB	-2.32193	0.00502493	0.0351272
arahy.S5HWQ6	-2.3195	4.85209e-05	0.000821376
arahy.8YA0Q1	-2.31573	0.000423475	0.00491323
arahy.29G5I6	-2.31425	0.000407922	0.00476604
MSTRG.46447	-2.31345	1.19627e-30	9.56073e-28
arahy.B2ZAEY	-2.30415	0.0065148	0.0427452
arahy.P4LK2T	-2.30142	1.08303e-14	1.55743e-12
arahy.0CD108	-2.30117	0.00679813	0.0441927
arahy.I6UTLU	-2.30066	6.87427e-05	0.00110092
arahy.P0FUFN	-2.30039	2.39261e-05	0.000444301
arahy.C4PCKW	-2.30039	0.000873429	0.00882539
arahy.33GVDY	-2.30023	0.00575725	0.0389177
arahy.M0J9YU	-2.29956	0.0071017	0.0456732
arahy.T1FE81	-2.29811	2.16399e-09	1.24046e-07
arahy.DVHS31	-2.29039	0.000854552	0.00868958
arahy.YU78V4	-2.29039	0.000854552	0.00868958
arahy.EBCB1I	-2.2852	0.00763214	0.0484029
arahy.UB0XN1	-2.28109	0.00285327	0.0228828
arahy.9UNY9A	-2.2772	1.01701e-06	2.91691e-05
arahy.YVH9GL	-2.2739	0.000303909	0.00372351
arahy.EM6VH3	-2.26961	0.00129909	0.0120943
arahy.M3F96W	-2.26876	1.65125e-07	5.9108e-06
arahy.NYRC7E	-2.2682	0.00270637	0.0219162
arahy.S242D2	-2.26255	1.25978e-07	4.64553e-06
arahy.9M10FC	-2.26104	1.2053e-08	5.77088e-07
arahy.6B6D15	-2.2578	2.08847e-06	5.47948e-05
arahy.PN2V7H	-2.25552	1.71254e-06	4.59468e-05
arahy.I0T1AJ	-2.25376	2.09674e-12	2.10989e-10
arahy.0VA8DK	-2.25334	0.00190785	0.0165396
arahy.S50TDH	-2.25096	0.000216819	0.00283447
arahy.B4XBIM	-2.24682	6.84819e-08	2.66483e-06
arahy.R9YPEF	-2.24672	0.000268752	0.00337638
arahy.8LB7BZ	-2.24423	0.00279141	0.0224896
MSTRG.47838	-2.24366	2.33231e-05	0.000435634
arahy.U5B1LH	-2.24247	1.24541e-07	4.59663e-06
arahy.03P8S0	-2.24207	0.00706943	0.0455642
arahy.KIJ6L7	-2.24202	5.92925e-25	3.00504e-22
arahy.TH16Y7	-2.24046	0.00242268	0.0200411
arahy.CT84XJ	-2.23638	1.41465e-09	8.36293e-08
arahy.BNMM5E	-2.23344	2.54823e-12	2.52784e-10
arahy.15VPYU	-2.23266	0.00289894	0.023191
arahy.LSHR7Z	-2.23266	0.00345781	0.0266957
arahy.C64BLU	-2.22726	4.59052e-05	0.000783479
arahy.XFL0DY	-2.22678	3.62135e-20	1.11481e-17
arahy.0PC09D	-2.22628	0.00586466	0.0394967
arahy.79Y86V	-2.21752	2.0083e-08	9.10175e-07
arahy.CI212M	-2.21518	0.00635477	0.0419203
arahy.30BR38	-2.21475	0.000503867	0.00566717
arahy.GYR78M	-2.21223	1.38043e-05	0.000279201
MSTRG.48444	-2.21196	0.00492536	0.0346492
arahy.VC882V	-2.21146	1.02307e-08	4.99035e-07
arahy.078CEZ	-2.2084	4.69969e-12	4.41887e-10
MSTRG.43217	-2.20771	7.23976e-10	4.55185e-08
arahy.B25V59	-2.20441	0.000177158	0.0024092
arahy.XB2EEE	-2.20409	0.000120138	0.00175804
arahy.31HZRQ	-2.20246	3.04824e-07	1.01508e-05
arahy.A5JVQI	-2.20246	3.04824e-07	1.01508e-05
arahy.QPBR19	-2.19931	0.00158342	0.0142405
arahy.DL456K	-2.19573	9.53598e-05	0.00144849
arahy.9AY56M	-2.19438	0.00247004	0.0203445
arahy.V5BWWI	-2.19321	1.82099e-07	6.408e-06
arahy.WW5SAZ	-2.1822	0.00228367	0.0191549
arahy.UW10HH	-2.18145	0.000697239	0.00736375
arahy.Q9UH73	-2.18027	2.28118e-05	0.000427236
arahy.TQI4QJ	-2.17569	3.23894e-18	7.73604e-16
arahy.QDYD89	-2.1746	5.62568e-09	2.88283e-07
arahy.84IAJ5	-2.17264	5.30634e-08	2.13069e-06
arahy.TJQ42N	-2.16802	0.000169361	0.00232292
arahy.L4CNUE	-2.16448	4.92325e-06	0.00011367
arahy.7E3CAD	-2.1635	4.07697e-14	5.31143e-12
arahy.YNP00W	-2.16276	0.000440245	0.00505838
arahy.VJF7LG	-2.16024	0.00455447	0.032736
arahy.19LA55	-2.15904	0.000623975	0.00673902
arahy.W6Q2IR	-2.15619	5.01644e-08	2.02997e-06
arahy.QJ0MNA	-2.15024	0.00143193	0.0131223
MSTRG.44001	-2.14826	0.000653485	0.00699233
arahy.GVJC4J	-2.14751	8.57845e-28	5.94187e-25
MSTRG.7809	-2.14495	0.00759616	0.0482552
arahy.K02X6N	-2.14329	1.51694e-05	0.000302362
arahy.XE3XSF	-2.14296	0.00144149	0.0131866
arahy.K1SYHL	-2.14182	9.31009e-08	3.52064e-06
arahy.Q85AV3	-2.13843	2.48946e-09	1.40379e-07
MSTRG.36611	-2.13452	2.17873e-05	0.000410824
arahy.CQ6V0L	-2.1323	3.87077e-05	0.000675337
arahy.RE7MP5	-2.13118	8.64315e-12	7.82572e-10
MSTRG.24630	-2.13111	0.000825229	0.00845346
arahy.BCQZ8L	-2.12928	2.66064e-08	1.16716e-06
arahy.RZ4SVU	-2.12711	0.00591401	0.0397638
arahy.UFQ84G	-2.12711	0.00676972	0.0440907
arahy.LLCI7H	-2.12454	1.1263e-09	6.77392e-08
arahy.RRN87R	-2.1232	0.00702023	0.0453104
MSTRG.36016	-2.12233	3.881e-20	1.18596e-17
arahy.3W1XRD	-2.11605	2.56235e-06	6.50114e-05
arahy.0UNU52	-2.11378	4.17896e-07	1.34007e-05
arahy.MB41E4	-2.11341	3.63365e-05	0.000636639
arahy.7U017G	-2.10904	0.00147196	0.0134269
arahy.K5MJK0	-2.10753	0.000260639	0.00329036
arahy.NA8V5S	-2.10733	0.00260139	0.0212483
arahy.9N50L0	-2.10556	4.21426e-07	1.34931e-05
arahy.X563NF	-2.10014	8.96429e-05	0.00137776
arahy.Y5CARX	-2.09899	2.72528e-11	2.25169e-09
arahy.BD15MZ	-2.09717	0.000536861	0.00596402
arahy.S6LY3A	-2.09717	0.000536861	0.00596402
arahy.57FUCZ	-2.0915	0.00112471	0.0108024
arahy.VYY6KX	-2.08975	0.00607194	0.0405814
arahy.8JA41T	-2.08913	0.000102184	0.0015363
arahy.SM45K0	-2.08826	2.76252e-05	0.000503101
arahy.KZ47MP	-2.08746	0.000206209	0.00272419
arahy.1A4P42	-2.08484	6.29564e-05	0.00102686
arahy.436L1R	-2.08178	3.36792e-12	3.27792e-10
arahy.369VWG	-2.08062	4.08385e-12	3.93784e-10
arahy.PDUF2H	-2.07928	0.000629186	0.00678296
arahy.XJH13Y	-2.07851	6.88971e-06	0.000153337
arahy.1TFV27	-2.07696	0.000317518	0.00386292
arahy.ZGW6CE	-2.07627	0.00175729	0.0155121
arahy.Y34BLP	-2.07125	0.00325841	0.0254926
arahy.FRGP6V	-2.0682	6.90282e-13	7.43197e-11
MSTRG.38278	-2.06579	0.000662141	0.00706856
arahy.49RQQB	-2.06564	5.94301e-05	0.000976614
arahy.MX0VEQ	-2.0656	7.77787e-11	5.95286e-09
arahy.B29LWX	-2.06434	0.000695041	0.00734619
arahy.I8IDBT	-2.06201	0.000256617	0.00324988
arahy.FUF0I1	-2.05949	1.18242e-14	1.69449e-12
arahy.MLE48V	-2.05739	2.72781e-05	0.000497652
arahy.FIF49B	-2.05696	0.000102732	0.00154076
arahy.RYXG2W	-2.05585	2.53087e-06	6.44488e-05
arahy.T50ENK	-2.05585	2.8204e-06	7.03559e-05
arahy.GZJ8DG	-2.05489	0.000815161	0.00836269
arahy.Z5I6I4	-2.05311	0.000228877	0.00295584
MSTRG.41108	-2.05285	0.00666282	0.0435018
arahy.V77HLY	-2.05255	0.00234432	0.0195441
MSTRG.39570	-2.05069	2.54858e-12	2.52784e-10
arahy.677WAC	-2.04838	1.09518e-07	4.08568e-06
arahy.KG047H	-2.04814	7.69509e-09	3.84375e-07
arahy.ZRH25X	-2.04409	1.76778e-06	4.72458e-05
arahy.89BLSN	-2.03862	1.83033e-07	6.4354e-06
arahy.251GCH	-2.036	1.49842e-15	2.40436e-13
arahy.H6K0T5	-2.03414	1.27936e-11	1.12408e-09
arahy.QX73S9	-2.03194	4.86365e-09	2.53612e-07
arahy.Y1RMCQ	-2.03103	0.00632437	0.0417865
arahy.95ZZMZ	-2.03025	0.00409451	0.0302352
arahy.WLZ7Z3	-2.02975	2.19358e-06	5.69769e-05
arahy.8Y4PDX	-2.02518	0.00454735	0.0327124
arahy.T9RE2C	-2.02515	0.000317197	0.00386128
arahy.S6WQLB	-2.02502	0.000673174	0.0071716
arahy.28CQXC	-2.02487	6.70202e-13	7.23452e-11
arahy.8W099G	-2.022	3.67425e-07	1.19763e-05
arahy.DXZI51	-2.02029	0.000236289	0.0030374
arahy.K91ZD2	-2.01751	3.45068e-09	1.8552e-07
arahy.8KGB21	-2.0171	4.82055e-08	1.95811e-06
arahy.462RQZ	-2.01495	4.4501e-06	0.000104075
arahy.Z4CR3N	-2.01459	1.84709e-05	0.000356376
arahy.89WW7B	-2.01428	0.000391722	0.00461178
arahy.N83S5Z	-2.01428	0.000391722	0.00461178
arahy.N04HLW	-2.01408	1.64514e-07	5.89908e-06
arahy.W2HH1V	-2.01352	1.43737e-12	1.47861e-10
arahy.869X10	-2.01081	7.37493e-05	0.00116983
arahy.2T4TQI	-2.01041	2.71337e-23	1.19963e-20
arahy.CVB38J	-2.00877	0.00524411	0.0362689
arahy.4UAT3U	-2.0042	1.55111e-06	4.21324e-05
arahy.D7QF3J	-2.0035	0.00436333	0.0317574
arahy.P0W3IN	-2.0035	0.00436333	0.0317574
arahy.T76A9L	-2.00278	0.000126759	0.00183617
arahy.L31C0T	-2.00204	0.00480549	0.034034
arahy.MYHZ2L	-1.99759	1.63764e-10	1.18157e-08
arahy.C0Y5NS	-1.99631	0.000762016	0.00792905
arahy.L3LV8Q	-1.99525	0.00443682	0.0321405
arahy.S827EG	-1.99412	1.71618e-26	1.00455e-23
arahy.TFY1SD	-1.98894	5.85734e-20	1.69045e-17
arahy.SIZM0A	-1.98882	3.719e-07	1.21127e-05
arahy.T3KBEX	-1.98307	4.85404e-08	1.96809e-06
arahy.V0FABF	-1.97978	1.03881e-05	0.000219146
arahy.XH5ZLH	-1.97615	5.4536e-07	1.69392e-05
arahy.IBV8H8	-1.97286	6.87443e-07	2.08299e-05
arahy.2FF2JF	-1.97158	1.9222e-15	3.04903e-13
arahy.8AIE61	-1.96963	2.96071e-08	1.27904e-06
MSTRG.40609	-1.9693	1.90848e-17	4.19653e-15
arahy.NSGB9G	-1.96896	8.62014e-12	7.82193e-10
arahy.X1E7Z2	-1.96683	0.00217294	0.0184146
arahy.XNU6AG	-1.96611	0.00604933	0.0404902
arahy.GU7FRK	-1.96501	0.00373565	0.0282941
arahy.R8ZZ7K	-1.96255	4.74869e-10	3.16775e-08
arahy.B5S055	-1.96087	0.000190218	0.00255338
arahy.12W07B	-1.95868	2.32685e-21	8.19503e-19
arahy.S5L7UT	-1.95306	2.50357e-09	1.40984e-07
arahy.8D8HC8	-1.95287	0.000860859	0.00873448
arahy.Q9TM1C	-1.95143	7.63342e-12	6.97225e-10
arahy.FGZL3B	-1.94828	0.00445068	0.0321889
MSTRG.41032	-1.94587	0.00355975	0.027316
arahy.JRGB4J	-1.94327	7.53485e-12	6.89738e-10
MSTRG.25832	-1.94166	0.00212095	0.0180402
arahy.E6QCJN	-1.94059	5.00434e-09	2.59969e-07
arahy.E6JEP5	-1.93983	7.71492e-07	2.29345e-05
arahy.6W400J	-1.9386	0.00153122	0.013861
arahy.93RWPI	-1.93681	1.27213e-22	5.23449e-20
arahy.TDL8AI	-1.93462	0.000107088	0.00159401
arahy.B2PA1P	-1.93411	0.000292099	0.00361114
MSTRG.45279	-1.93186	4.28817e-12	4.09683e-10
arahy.5MI3H4	-1.93028	0.00125348	0.0117433
arahy.YVF32X	-1.92953	6.6359e-14	8.30667e-12
arahy.62I324	-1.9272	4.89051e-06	0.000113355
arahy.U735UZ	-1.927	3.35035e-05	0.000594015
arahy.H9FWK3	-1.92697	0.00520636	0.0360979
arahy.SND7WH	-1.92661	3.64136e-08	1.53324e-06
arahy.2XHF5V	-1.92564	1.28882e-07	4.73891e-06
arahy.77GR70	-1.92025	0.00207029	0.017678
arahy.JZ966I	-1.91951	9.84266e-06	0.000209985
arahy.KRC5M1	-1.91706	0.00258208	0.021132
arahy.KDN9T4	-1.91459	2.91242e-09	1.60954e-07
arahy.XPW8SI	-1.91235	4.05088e-05	0.000700293
arahy.P8YRGA	-1.91227	4.65163e-14	5.96657e-12
arahy.CXU575	-1.91202	1.46861e-05	0.000294767
arahy.HYA0MS	-1.91175	0.000257449	0.00325801
arahy.WG4WWJ	-1.91141	1.35692e-07	4.95536e-06
arahy.XZ331S	-1.90923	7.99019e-07	2.36682e-05
arahy.R2E5NI	-1.90851	2.71162e-06	6.82571e-05
arahy.FJX6IH	-1.90831	1.47423e-05	0.000295408
arahy.T88YYN	-1.9071	8.2712e-13	8.83658e-11
arahy.73GA7L	-1.90643	0.000428469	0.00496009
arahy.Z2UJXV	-1.90605	1.35199e-05	0.000274755
arahy.2P31SD	-1.9046	3.0076e-10	2.08322e-08
arahy.4Z06T4	-1.90438	1.06991e-11	9.50097e-10
arahy.2V0WQW	-1.90215	1.05752e-05	0.000222417
arahy.5IZP5X	-1.89921	1.3618e-07	4.96448e-06
arahy.ZD5CML	-1.89921	1.3618e-07	4.96448e-06
arahy.IL02F1	-1.89757	2.11282e-05	0.000400761
arahy.UYHY8X	-1.89363	0.000273557	0.0034202
arahy.BZ66YC	-1.89231	5.73706e-08	2.27254e-06
arahy.V2RKK9	-1.89003	0.00037568	0.00445446
arahy.EV1AUE	-1.88573	0.00017342	0.00236611
arahy.23EIYW	-1.88344	3.94041e-08	1.63596e-06
arahy.V3297W	-1.88323	0.00441855	0.0320584
arahy.03A2T4	-1.88028	1.68809e-07	6.03747e-06
arahy.Y3R0BI	-1.87991	6.55206e-07	1.99778e-05
arahy.FU37Q3	-1.8795	7.15597e-09	3.59607e-07
arahy.SPE8CT	-1.8791	1.30911e-05	0.000267374
arahy.LM5V2S	-1.87831	1.45071e-05	0.000292103
arahy.WMSV6U	-1.87603	3.45843e-05	0.000610314
arahy.C2XCQ2	-1.87571	0.00463138	0.0331454
arahy.W22NE1	-1.87221	4.70436e-06	0.000109406
arahy.S68IDS	-1.86469	4.39602e-06	0.000102868
arahy.2H5638	-1.86285	6.71349e-05	0.00107933
arahy.MFIY4C	-1.86285	6.71349e-05	0.00107933
arahy.NFLV1C	-1.86216	0.0078356	0.0492722
arahy.2T1K1Y	-1.86102	2.20158e-05	0.000414656
arahy.5Z1D6W	-1.85904	1.12617e-05	0.000234364
arahy.A99G02	-1.85867	3.1234e-08	1.34374e-06
arahy.84FS6Z	-1.85758	6.30177e-15	9.32011e-13
arahy.X6JA7U	-1.85719	5.18205e-14	6.58595e-12
arahy.T1S7CJ	-1.85681	1.09568e-05	0.000229478
arahy.LIRE86	-1.85671	0.00151417	0.0137392
arahy.W9RD48	-1.85466	0.00496988	0.0348596
arahy.M37AJ6	-1.85182	9.67924e-08	3.64365e-06
arahy.YB9YM9	-1.84954	2.57528e-11	2.13625e-09
arahy.79CW3E	-1.84714	1.94137e-06	5.12913e-05
arahy.NF6T15	-1.84591	1.21951e-07	4.51706e-06
arahy.83FN4T	-1.84373	8.9646e-06	0.000192637
MSTRG.45938	-1.83665	9.5331e-10	5.82627e-08
arahy.WX9SXY	-1.83605	1.66556e-06	4.49182e-05
arahy.ZRX0EM	-1.83519	0.000222404	0.00289112
arahy.I4GK8M	-1.83462	2.55235e-06	6.48369e-05
arahy.JU75F3	-1.83338	6.53019e-09	3.30389e-07
arahy.K64R7P	-1.83281	6.21875e-06	0.000140079
arahy.96G9DX	-1.83235	2.38705e-05	0.000443466
arahy.K9KY54	-1.82779	1.85824e-08	8.5239e-07
arahy.YVP0PI	-1.82751	1.41215e-07	5.11661e-06
arahy.SZD3Q1	-1.82532	0.000267126	0.00335697
arahy.MS2B16	-1.82212	1.37218e-07	4.99354e-06
arahy.0FWC6J	-1.82103	0.00148481	0.0135234
arahy.YSDC3Q	-1.81945	1.61305e-08	7.51531e-07
arahy.ZPNK8K	-1.81816	2.04834e-08	9.27309e-07
arahy.9F81FQ	-1.81751	8.23831e-16	1.39177e-13
arahy.69QE7M	-1.81669	0.0046743	0.0333435
arahy.IR3FU7	-1.81625	1.31292e-06	3.65953e-05
arahy.G4CA9S	-1.8162	2.67271e-08	1.16993e-06
arahy.JTW9M4	-1.81558	5.99907e-05	0.00098427
arahy.VTU1BI	-1.81497	3.13061e-05	0.000558631
arahy.BDKN1M	-1.8149	6.29249e-06	0.000141433
arahy.72M57I	-1.81471	3.81231e-09	2.03123e-07
arahy.1Z7GQF	-1.81395	6.60102e-08	2.57589e-06
arahy.XPP88F	-1.81294	0.000269498	0.00338166
arahy.UPMC5B	-1.81157	5.06804e-10	3.34321e-08
arahy.FCQ45K	-1.8111	0.00462067	0.0330859
arahy.88QBIW	-1.81077	1.44919e-06	3.97538e-05
arahy.AL0RLL	-1.81073	6.61634e-11	5.15888e-09
arahy.7NL1KT	-1.81053	0.00534792	0.0368174
arahy.DH99G0	-1.80735	4.68624e-08	1.91312e-06
arahy.KZCX9C	-1.80735	2.91058e-05	0.00052364
arahy.EKFN80	-1.80735	0.000415271	0.0048356
arahy.KV6MGK	-1.80576	4.89692e-05	0.000827618
MSTRG.35522	-1.80423	1.10278e-06	3.13693e-05
arahy.YE3XLF	-1.8042	3.73073e-05	0.000652273
arahy.R3RT9K	-1.80411	2.69315e-06	6.78742e-05
arahy.ZU9B18	-1.80396	7.84787e-13	8.40592e-11
arahy.J201LF	-1.80339	8.67717e-10	5.35037e-08
arahy.QHK75C	-1.80284	3.95869e-13	4.47063e-11
arahy.HI299V	-1.80277	0.0063844	0.0420469
arahy.JB98L2	-1.80277	0.0063844	0.0420469
arahy.7RX9RF	-1.80168	5.62941e-06	0.000128404
arahy.8G0T62	-1.79897	9.56217e-05	0.00145193
arahy.SZB8BC	-1.79879	0.000552951	0.00609789
MSTRG.9849	-1.79481	0.0058567	0.0394679
arahy.X9PUIV	-1.79201	3.94285e-06	9.3368e-05
arahy.PA307L	-1.79174	1.12815e-05	0.000234659
arahy.V8DYZI	-1.79008	0.000685225	0.0072642
arahy.5B6ZAR	-1.78813	0.000122144	0.00178175
arahy.90PEWX	-1.7879	0.00204885	0.0175346
arahy.JZMQ8V	-1.78727	0.00283823	0.022793
arahy.CFE04G	-1.7851	0.00485014	0.0342626
MSTRG.38387	-1.78453	0.00196355	0.0169336
arahy.VN8AVF	-1.78354	5.30625e-10	3.46733e-08
arahy.KR3NZ5	-1.78326	2.86112e-05	0.000516219
arahy.D9IB2L	-1.78319	0.00770488	0.0487377
arahy.M1ZEFN	-1.77858	7.18305e-10	4.52304e-08
arahy.IA8S0M	-1.77819	1.71436e-08	7.91635e-07
arahy.IP5B92	-1.77663	5.5698e-07	1.72614e-05
arahy.X3FWT9	-1.77662	0.000795882	0.00821561
arahy.58ZGJB	-1.77374	2.46689e-08	1.09298e-06
arahy.GP1R7D	-1.77358	3.73536e-10	2.54072e-08
arahy.WDN5HE	-1.77173	0.00123478	0.0116074
arahy.404K6R	-1.76988	2.78517e-06	6.97702e-05
arahy.MDB4JZ	-1.76975	2.70294e-06	6.80797e-05
arahy.RQMB8Y	-1.76673	1.52603e-07	5.51481e-06
arahy.NR4K5D	-1.76661	0.00564074	0.0383358
arahy.KL6745	-1.76652	4.96291e-05	0.000837409
arahy.V6VDUM	-1.76644	0.00165248	0.0147341
arahy.NI0LJQ	-1.76571	6.49385e-05	0.00104956
arahy.Z2JA3J	-1.76553	0.00163088	0.0145758
arahy.1TPR6M	-1.76398	4.48693e-05	0.000766745
arahy.HEJ4FG	-1.76275	0.000198793	0.00264457
arahy.C6FL8N	-1.75922	8.67128e-08	3.29707e-06
arahy.LT1T36	-1.75788	8.71432e-06	0.000188134
arahy.01BY0R	-1.75778	0.00162887	0.0145662
arahy.2QV4RS	-1.7576	1.96462e-11	1.66628e-09
arahy.8YLP1I	-1.75685	0.00369493	0.0280854
arahy.449CV2	-1.75644	8.0737e-05	0.00125904
arahy.8G1XAU	-1.75642	1.21005e-06	3.40017e-05
arahy.NA9T15	-1.7536	0.000541514	0.00600448
arahy.KWX84I	-1.75288	2.11398e-21	7.5737e-19
arahy.MDQW5U	-1.75247	4.16781e-07	1.33856e-05
arahy.EMNX2S	-1.75023	3.0872e-09	1.68595e-07
arahy.CC10Q4	-1.74914	0.000301808	0.0037044
arahy.6LM78C	-1.74716	1.50699e-08	7.06077e-07
arahy.W8MD7M	-1.74551	0.00153686	0.0139042
arahy.T9QV62	-1.74388	2.3559e-07	8.01873e-06
arahy.D1TSEC	-1.74267	0.0026077	0.0212789
arahy.5ZY4RD	-1.7409	0.000309383	0.00377943
arahy.ZQR06K	-1.73985	1.21609e-06	3.41484e-05
arahy.X4HBY6	-1.7393	3.05587e-11	2.49998e-09
arahy.A94T56	-1.73697	0.00024281	0.00311353
arahy.Q82RJU	-1.73584	0.00500022	0.0350193
arahy.KZA261	-1.73347	5.96623e-10	3.85016e-08
arahy.J2QQC8	-1.7323	0.00134229	0.012438
arahy.72R8EF	-1.72874	0.000653079	0.00698978
MSTRG.20457	-1.72583	3.96869e-05	0.000688951
arahy.8A7NWS	-1.72129	9.9966e-08	3.75632e-06
arahy.49QGSQ	-1.71921	0.000114306	0.00168575
arahy.VVZ76M	-1.71621	0.000570492	0.006259
arahy.U3KQD4	-1.713	0.0064427	0.042319
arahy.X181HS	-1.70872	3.96381e-05	0.000688678
arahy.JFI702	-1.7085	9.16823e-10	5.6281e-08
arahy.L6P940	-1.7085	9.16823e-10	5.6281e-08
MSTRG.9226	-1.70613	0.0033462	0.0260274
arahy.3S4WCE	-1.70592	0.00396635	0.0295249
arahy.WTTZ34	-1.70534	0.00080789	0.00831067
arahy.WB0Z4U	-1.70519	0.0033723	0.0261913
arahy.3URM83	-1.70454	0.000132189	0.00190158
arahy.I442D3	-1.70316	5.22698e-08	2.10289e-06
arahy.EP0P4J	-1.70249	6.85531e-05	0.00109865
arahy.A0NHG5	-1.70141	1.70662e-09	9.96142e-08
arahy.IPD4BK	-1.70028	0.00019628	0.00261784
arahy.CD5B6Y	-1.69851	5.45529e-06	0.000124706
arahy.AF3YLM	-1.69732	0.00385874	0.0289443
arahy.5ECK1G	-1.69728	1.61422e-06	4.36469e-05
arahy.ZCN7QC	-1.69656	4.99825e-11	3.97175e-09
arahy.KQ35EQ	-1.69571	1.1437e-07	4.24762e-06
arahy.L9QF8B	-1.69507	2.55215e-07	8.63718e-06
arahy.TF28KF	-1.69484	3.31079e-09	1.78924e-07
arahy.47B3FN	-1.6932	2.9249e-16	5.37858e-14
arahy.GB3LZN	-1.6919	6.07043e-08	2.39129e-06
arahy.L6XCTY	-1.69116	2.4633e-08	1.09255e-06
MSTRG.18078	-1.69076	1.4964e-05	0.000299027
arahy.H3TEND	-1.69054	3.82234e-09	2.03397e-07
arahy.722ASC	-1.69006	3.14076e-10	2.16822e-08
arahy.9FGC6P	-1.68966	0.00598662	0.0401546
arahy.0E1AJJ	-1.68907	0.0045775	0.0328674
arahy.BUN8CC	-1.68816	4.41008e-10	2.96088e-08
arahy.FJBE5X	-1.68732	0.00209697	0.0178671
arahy.UKS4G3	-1.68704	1.72815e-13	2.052e-11
arahy.THTJ31	-1.68578	7.70355e-11	5.90686e-09
arahy.89WMF4	-1.68468	0.000108991	0.00161672
arahy.IC1SCX	-1.68414	0.000772275	0.00801173
arahy.Y93F21	-1.6839	0.0036953	0.0280854
arahy.60J8GE	-1.68382	0.00621852	0.04131
arahy.IEA635	-1.68344	0.00407039	0.0300892
arahy.PVL51W	-1.68216	0.0024397	0.0201522
arahy.P3GIX3	-1.68138	1.06715e-05	0.000224328
arahy.J0AE6B	-1.68066	0.000167737	0.00230599
arahy.K6ZRIQ	-1.67829	8.47329e-06	0.000183407
arahy.8Z5VIY	-1.67611	0.000116989	0.001718
arahy.BA5EUQ	-1.67584	1.87541e-05	0.000360167
arahy.38YHDK	-1.67524	4.96473e-17	1.01142e-14
arahy.3F9MFA	-1.67498	9.61547e-05	0.00145896
arahy.RSVT1Z	-1.67485	1.3195e-15	2.13374e-13
MSTRG.19101	-1.67432	0.00246873	0.0203406
arahy.RLNB7U	-1.67419	9.2637e-05	0.00141749
arahy.PT8LN6	-1.67258	0.00514901	0.0357959
arahy.8TPQ4A	-1.66769	4.80956e-13	5.30187e-11
arahy.34G3CR	-1.66711	0.000147984	0.00207913
arahy.42EX8Y	-1.66706	6.32923e-08	2.48382e-06
arahy.WG68KN	-1.6667	0.000994867	0.0098022
arahy.8NT8TY	-1.66544	0.000364223	0.00433345
arahy.5H969I	-1.6633	2.80032e-05	0.000507538
arahy.2SVG3G	-1.66297	0.00679294	0.0441661
arahy.WJPX1L	-1.66297	0.007281	0.0466027
arahy.63ATS7	-1.66245	0.000123323	0.00179453
arahy.7N98ZI	-1.66107	0.000911815	0.00913447
arahy.YI48ND	-1.65858	1.96361e-05	0.000375199
arahy.QGW2TM	-1.65795	2.31105e-05	0.000432439
arahy.Y8TUYE	-1.65614	0.00158311	0.0142405
arahy.I7UCTP	-1.6555	5.47671e-05	0.000911519
arahy.SLVF1G	-1.65501	6.9671e-05	0.00111227
arahy.NS3ZLY	-1.65277	5.18894e-07	1.61799e-05
arahy.LQP2H5	-1.65158	5.97933e-12	5.53441e-10
arahy.QU3TGI	-1.65068	2.50513e-10	1.75863e-08
arahy.WU77LG	-1.65068	2.50513e-10	1.75863e-08
arahy.2GR8KM	-1.64878	0.000250141	0.00318493
arahy.WI2A41	-1.64868	6.22841e-10	4.00072e-08
arahy.3V0V2N	-1.64858	8.86071e-18	2.02331e-15
arahy.43G8Y5	-1.64753	9.99245e-10	6.07129e-08
arahy.3H2NFR	-1.64318	0.00206947	0.0176747
arahy.GR7IKK	-1.64318	0.00206947	0.0176747
arahy.HRE7NK	-1.64211	0.0066964	0.0436816
arahy.KU7HBQ	-1.6382	0.00199502	0.0171446
arahy.WVQY2R	-1.63686	0.00438128	0.0318492
arahy.M0PR6E	-1.63672	0.00171177	0.0151651
arahy.N0BKZ2	-1.63595	2.86173e-06	7.11309e-05
arahy.U93Q4L	-1.63472	0.00180859	0.0158681
arahy.JV2CAC	-1.63413	0.00379827	0.0286174
arahy.JIKB9X	-1.63189	7.38649e-11	5.70586e-09
arahy.P4U3EW	-1.63169	0.00474831	0.0337614
arahy.5R7M77	-1.63038	8.89333e-05	0.0013704
arahy.WD5WT3	-1.62959	0.000945929	0.00940327
arahy.02VXE5	-1.62946	4.31166e-08	1.77766e-06
arahy.VD3B34	-1.62876	2.81792e-06	7.03452e-05
arahy.5UFA25	-1.62573	0.00030859	0.00377307
arahy.6R4MXJ	-1.62398	8.97386e-07	2.62822e-05
arahy.Y6VK3W	-1.62398	8.97386e-07	2.62822e-05
arahy.ZNF0Y2	-1.62319	1.18152e-08	5.67009e-07
arahy.5FT298	-1.62256	0.000187067	0.00252004
arahy.U6I4YS	-1.62255	4.17424e-12	4.00641e-10
arahy.B2PSPG	-1.62229	9.20501e-10	5.64235e-08
arahy.NSTM2K	-1.62212	0.00672423	0.0438219
MSTRG.42865	-1.6203	0.00121219	0.011439
arahy.4YX487	-1.61855	3.29732e-06	8.04186e-05
arahy.54SJKS	-1.6171	0.00593271	0.0398831
arahy.CBA0IH	-1.61617	0.00712279	0.0457528
arahy.49CTIT	-1.61471	0.00486889	0.0343717
arahy.E48PAY	-1.61348	7.21862e-09	3.62317e-07
arahy.VQI5ED	-1.61153	3.79213e-08	1.58981e-06
arahy.271GPI	-1.60768	0.00110132	0.0106145
arahy.ZP6T3L	-1.60755	1.14239e-16	2.22895e-14
arahy.JLE0C4	-1.60749	0.0006917	0.00731831
arahy.DB9XMS	-1.60665	2.201e-09	1.2582e-07
arahy.WK9AFF	-1.60466	5.08061e-07	1.58983e-05
arahy.EY5UDZ	-1.60401	0.000216049	0.00282681
arahy.VH7VLJ	-1.60205	1.45341e-05	0.000292505
arahy.MVB9VE	-1.60175	1.58604e-07	5.70684e-06
arahy.90CUL1	-1.6008	0.0010795	0.0104551
arahy.P96X61	-1.59988	6.0579e-06	0.000137077
arahy.EDFF2E	-1.59982	1.41443e-09	8.36293e-08
arahy.009U6B	-1.59826	0.000473498	0.00538366
arahy.E6VM83	-1.59664	0.00250787	0.0206181
arahy.8MUI2Y	-1.59544	1.43437e-08	6.75082e-07
arahy.GVD2R3	-1.59282	1.38373e-06	3.82357e-05
arahy.M7C8NM	-1.59136	0.00252882	0.0207584
MSTRG.43721	-1.59111	3.2172e-06	7.89376e-05
arahy.2W3JFS	-1.591	0.000216612	0.00283265
arahy.MVCN72	-1.59	0.000135239	0.00193406
arahy.JIEX2F	-1.5832	0.00772135	0.0488096
arahy.DV4WFM	-1.58235	8.63213e-07	2.53528e-05
MSTRG.23355	-1.58173	0.00497528	0.0348857
arahy.DV6GD6	-1.58086	1.74865e-05	0.000341504
arahy.LUB646	-1.58066	0.0057296	0.0387685
arahy.V70TJV	-1.57938	0.000514848	0.00576416
arahy.DV8NTV	-1.57801	6.0942e-09	3.10378e-07
arahy.EQP4AY	-1.57799	0.000150887	0.00211206
arahy.CBW2N5	-1.57586	0.000180548	0.00244649
arahy.XGMD9S	-1.57469	0.00368328	0.0280252
arahy.8EK9UN	-1.5731	3.78922e-06	9.02444e-05
arahy.60SCVY	-1.57023	1.38878e-05	0.000280312
arahy.G33FQG	-1.57023	1.38878e-05	0.000280312
MSTRG.13827	-1.57001	0.00359807	0.0275135
arahy.774JYD	-1.56986	0.00627214	0.0415722
arahy.MRR6R9	-1.56948	5.80123e-09	2.96548e-07
arahy.IN97R0	-1.56939	0.000750787	0.00782985
arahy.12J3VU	-1.56861	3.553e-07	1.16359e-05
arahy.T5AJQY	-1.56857	0.00216273	0.0183356
arahy.BR0SNA	-1.56768	0.00374315	0.0283265
arahy.BASF4K	-1.56645	0.000347898	0.00416786
arahy.ZT6JLG	-1.5649	0.000201731	0.00267681
arahy.TPQ86D	-1.56338	0.00493979	0.0346986
arahy.VH3KGW	-1.56323	1.57549e-06	4.27387e-05
arahy.ZA7ZLB	-1.56294	0.00317768	0.0249974
arahy.77R5KL	-1.55916	1.0762e-05	0.000226001
arahy.Q0TDT5	-1.55865	5.48601e-08	2.19647e-06
arahy.4SLH2G	-1.55826	0.000131509	0.00189376
arahy.KGFT34	-1.55639	0.00053385	0.00593851
arahy.06QP13	-1.5559	0.000250053	0.00318478
arahy.44HGP5	-1.55564	2.15163e-07	7.40843e-06
arahy.J6NIZK	-1.55459	0.00114747	0.0109671
arahy.93C387	-1.55447	0.00757449	0.0481769
arahy.1QH4LM	-1.55254	1.9664e-06	5.18209e-05
arahy.VLLC8N	-1.5515	3.24259e-07	1.07121e-05
arahy.V5WJ5Y	-1.55055	0.00158892	0.0142807
MSTRG.6317	-1.54824	0.00272225	0.0220019
arahy.28UQCP	-1.54822	0.000958764	0.00950962
arahy.C6R2SB	-1.54557	2.76094e-05	0.000503034
arahy.LK7ZFW	-1.54434	6.82463e-10	4.33015e-08
arahy.MFI07V	-1.54432	0.0035597	0.027316
arahy.RD3CQX	-1.54367	0.000652308	0.00698693
arahy.GG3E31	-1.54351	0.00346453	0.0267278
arahy.YS6FHA	-1.54205	0.00780014	0.0491287
arahy.1E9HF3	-1.54146	0.000231085	0.00298066
arahy.B4TR6Y	-1.54122	2.8218e-09	1.5657e-07
arahy.LS67LH	-1.54006	8.36881e-14	1.02596e-11
arahy.H6WUU0	-1.53943	3.80898e-17	7.83909e-15
arahy.96F7ZV	-1.5393	2.27911e-14	3.08384e-12
arahy.JNA5NA	-1.53899	3.2068e-07	1.06108e-05
arahy.J5XN66	-1.53812	0.000288589	0.00357907
arahy.T18AYA	-1.53778	3.98277e-05	0.000690529
arahy.HDM8J3	-1.53693	4.87522e-09	2.53896e-07
arahy.PF6WY1	-1.53687	0.0034673	0.0267441
arahy.VW0TTK	-1.53522	8.69564e-11	6.59456e-09
arahy.BA35D7	-1.53434	5.07909e-06	0.000116684
arahy.D2IUDG	-1.5338	0.000272188	0.00340718
arahy.T4ZW2M	-1.5329	3.51109e-08	1.48518e-06
arahy.NX8KLK	-1.53263	1.47966e-07	5.3519e-06
arahy.22Q2RH	-1.52966	1.28087e-05	0.000261968
arahy.T0P5W2	-1.52725	0.000715274	0.00752178
arahy.HSU2LT	-1.52333	8.07508e-12	7.34337e-10
arahy.BZ7TGJ	-1.52325	1.88687e-08	8.62668e-07
arahy.U67RVC	-1.5232	1.1222e-06	3.18344e-05
arahy.HT9M47	-1.523	0.000197918	0.00263546
arahy.CBHP4D	-1.51715	6.35215e-05	0.00103484
arahy.SKH1UB	-1.51645	9.51514e-05	0.00144585
arahy.UX5JN7	-1.51397	2.31932e-05	0.000433596
arahy.RR76TU	-1.51143	0.00788651	0.0495099
arahy.828D94	-1.51142	1.04388e-08	5.08587e-07
arahy.DCW7NL	-1.51017	1.26883e-05	0.000259889
arahy.DBBB2T	-1.50944	0.000507315	0.00569517
arahy.5GYD3M	-1.50784	8.67645e-06	0.000187414
arahy.Y4W2TZ	-1.50782	3.66142e-08	1.54013e-06
arahy.SFT1LS	-1.50769	2.33421e-08	1.04421e-06
arahy.XP1NDF	-1.5067	7.44922e-07	2.22572e-05
MSTRG.24429	-1.50655	9.98938e-06	0.000212679
arahy.0XXG28	-1.50653	2.65928e-09	1.48744e-07
arahy.9T6P32	-1.50539	0.000405233	0.0047413
arahy.TK5DM0	-1.50281	0.000408269	0.00476829
arahy.ML3LVJ	-1.5025	0.000557016	0.00613057
arahy.YN6DAV	-1.50197	0.000249275	0.00317877
arahy.50YJF0	-1.50151	0.000464043	0.00529376
arahy.IAH9UB	-1.50007	0.00641856	0.0422138
arahy.S447W1	-1.5	7.15245e-08	2.77248e-06
arahy.J71BBN	-1.49986	2.77077e-05	0.000503721
arahy.73DSWE	-1.49962	1.29331e-07	4.74813e-06
arahy.MKT5JH	-1.49902	0.000573308	0.00627995
arahy.2C7MHE	-1.49888	1.84227e-08	8.45997e-07
arahy.8MV22J	-1.49881	4.45939e-05	0.000763294
arahy.0SZ2NS	-1.49764	4.41739e-05	0.000756501
arahy.Q95PA7	-1.49701	0.000463491	0.00528891
arahy.MYBU45	-1.49687	1.9772e-08	9.00993e-07
arahy.D43PH9	-1.49538	0.00120474	0.0113843
arahy.08G0EU	-1.49457	0.00535536	0.0368429
arahy.B8NP97	-1.49363	3.91665e-08	1.62772e-06
arahy.H2XQXC	-1.49277	0.00477078	0.0338632
arahy.GXYI41	-1.49267	0.00522153	0.036185
MSTRG.48049	-1.4915	2.97369e-05	0.000533839
arahy.G5ZJAX	-1.48914	0.00055369	0.00610204
arahy.RR9WYE	-1.48864	3.18569e-06	7.82811e-05
arahy.AN7RS9	-1.48696	0.000498742	0.00562628
arahy.UKF2DL	-1.48607	0.00536676	0.0368762
arahy.HM0B14	-1.48567	0.000694717	0.00734463
arahy.A78VKF	-1.48496	0.000601834	0.00654241
arahy.QN6N73	-1.48422	7.1582e-08	2.77248e-06
arahy.HDCL4E	-1.48226	1.07202e-06	3.0599e-05
arahy.U36RLJ	-1.48075	7.74543e-06	0.000169774
arahy.35SLR1	-1.48063	0.000258923	0.0032705
arahy.Y6M3VX	-1.47947	8.00406e-06	0.000174798
arahy.6EUV2M	-1.47244	1.46018e-09	8.59544e-08
MSTRG.25810	-1.47131	0.00160676	0.0144082
arahy.IS7CAM	-1.46984	0.00423528	0.0310276
arahy.92D3LZ	-1.46919	0.000503308	0.00566395
arahy.AS1G8G	-1.46908	4.01646e-07	1.29596e-05
arahy.3WZ992	-1.46884	0.00678957	0.0441577
arahy.2UU2CT	-1.4682	0.00199119	0.0171152
arahy.4L43B4	-1.46765	1.8595e-16	3.56125e-14
arahy.EABL5T	-1.46664	5.29462e-05	0.00088547
MSTRG.34136	-1.46559	0.000199778	0.00265512
arahy.6F9B47	-1.46555	0.000987225	0.00974076
arahy.SUGY7B	-1.4654	6.55001e-07	1.99778e-05
arahy.CN40UY	-1.4626	0.00012801	0.00185043
arahy.ELY42R	-1.4623	4.33987e-12	4.13671e-10
arahy.MG1LG0	-1.46151	0.00156613	0.0141186
arahy.B12291	-1.46123	0.0051471	0.0357946
arahy.6XM150	-1.45943	0.0049317	0.0346796
arahy.WK29PC	-1.45711	6.49761e-08	2.5427e-06
arahy.CP6I7X	-1.45623	0.00389115	0.0291125
arahy.I91RQE	-1.45342	1.01597e-05	0.000215265
arahy.X77M8N	-1.45123	8.24815e-07	2.43455e-05
arahy.D3GWAL	-1.45109	0.000898754	0.00903297
arahy.N4KLNP	-1.45093	0.00151869	0.0137656
arahy.IDN2QB	-1.44974	3.33484e-05	0.000591771
arahy.W1PIJ6	-1.4494	0.000138963	0.00197577
arahy.YTRP8E	-1.44862	0.000550744	0.00608086
arahy.Y65TV9	-1.44644	3.11485e-06	7.66885e-05
arahy.8EC0VW	-1.44613	6.47101e-09	3.27962e-07
arahy.0BPR43	-1.44603	2.5621e-07	8.65678e-06
arahy.GN9VME	-1.44514	7.24224e-06	0.000160181
arahy.8U41WB	-1.44347	2.15833e-11	1.81575e-09
arahy.Y6RVYE	-1.44332	2.65834e-05	0.000486258
MSTRG.33032	-1.44182	1.94135e-08	8.85627e-07
arahy.65HUV4	-1.44081	2.41187e-11	2.01275e-09
arahy.02RLW9	-1.44009	4.46528e-05	0.000763987
arahy.DJ3VX7	-1.43932	0.000430066	0.00497581
arahy.SP0UUF	-1.43907	2.45706e-06	6.29551e-05
arahy.4BEG1R	-1.43857	0.000355124	0.0042399
arahy.274M2K	-1.43851	0.000674537	0.00718429
arahy.8XC5FI	-1.43752	0.00398046	0.0296035
arahy.GMWI1E	-1.43684	1.47461e-06	4.03446e-05
arahy.7S9A5A	-1.43637	3.55788e-05	0.000624945
arahy.FYT1UN	-1.43445	1.2202e-06	3.42404e-05
arahy.AV4A1B	-1.43386	0.00116542	0.0111036
arahy.T95EUW	-1.43366	3.49936e-10	2.39194e-08
arahy.UQ0Z3E	-1.43151	0.00300352	0.0238988
arahy.ZI7XC2	-1.43068	0.00157294	0.0141708
arahy.94DDXG	-1.43063	0.000142287	0.00201613
arahy.K80CQQ	-1.43063	0.00527824	0.0364565
arahy.SA7CU8	-1.4301	0.000299319	0.00368466
arahy.MW07R7	-1.43003	1.92972e-09	1.11385e-07
arahy.FYPZ9V	-1.42948	0.000329303	0.00397719
arahy.FJH25Q	-1.42791	5.72723e-07	1.76834e-05
arahy.X7C896	-1.42707	0.00548078	0.0374508
arahy.IXJA1X	-1.42656	0.000161415	0.0022329
arahy.XVT01H	-1.42626	0.00117299	0.0111577
arahy.B05S7J	-1.42473	1.96379e-11	1.66628e-09
arahy.EJ8M4M	-1.4231	1.09481e-05	0.000229478
arahy.P2ZBX8	-1.42236	4.00057e-10	2.71223e-08
MSTRG.39679	-1.42186	0.00704362	0.0454277
arahy.62ETWY	-1.42095	0.00019163	0.00256771
arahy.V8ELJA	-1.4204	0.001129	0.010836
arahy.SQH7P6	-1.42035	1.76795e-05	0.000344141
arahy.RCIJ6R	-1.41986	0.0010755	0.0104261
arahy.D1YJVB	-1.41883	7.44337e-05	0.00117958
arahy.VUQ1KR	-1.41881	0.0038591	0.0289443
arahy.IA9U5E	-1.41614	2.68272e-05	0.000489856
arahy.7HC8IY	-1.41465	0.00652263	0.0427832
arahy.IZ1RGH	-1.41448	7.13495e-05	0.0011361
arahy.76FTKD	-1.4144	0.00139778	0.0128538
arahy.RDA4JH	-1.41408	0.00158771	0.0142729
arahy.I3M5SU	-1.41388	6.92493e-06	0.000153982
arahy.VLN89B	-1.41282	2.65939e-06	6.7064e-05
MSTRG.18335	-1.41099	7.85268e-10	4.90751e-08
MSTRG.37379	-1.4098	1.82045e-05	0.000352217
arahy.92DGJ8	-1.4097	0.0043942	0.0319208
arahy.TJLQ2T	-1.40875	3.59579e-06	8.63734e-05
arahy.WCR287	-1.40848	0.000238722	0.00306394
arahy.CAS3GS	-1.40731	2.96729e-05	0.00053292
arahy.20DV7G	-1.40662	2.62459e-06	6.63071e-05
MSTRG.32351	-1.40605	0.0042075	0.0308547
arahy.WSDG12	-1.40599	0.000836186	0.00854777
arahy.R1PH36	-1.40557	4.84172e-06	0.000112286
arahy.SX97YB	-1.40486	0.00419072	0.0307653
arahy.B496DS	-1.40471	0.00567721	0.0384955
arahy.TUB0KC	-1.40317	1.52358e-06	4.14659e-05
arahy.HLLS2Z	-1.40187	2.48066e-06	6.35206e-05
arahy.LWF4SI	-1.40169	0.00710282	0.0456732
arahy.GEGB9W	-1.40125	0.00243592	0.0201302
arahy.WG32WU	-1.39943	0.000110384	0.00163429
arahy.F05SPM	-1.39724	6.31221e-06	0.000141755
arahy.J34XNI	-1.39613	0.00708948	0.0456369
arahy.QZYV06	-1.39613	0.00708948	0.0456369
arahy.LHNV5V	-1.39587	0.00314046	0.0247702
arahy.I7VPJ4	-1.39273	1.41478e-06	3.89778e-05
arahy.U3Z2PN	-1.39114	0.00771541	0.0487821
arahy.4EQU0E	-1.38949	0.000639706	0.00687027
MSTRG.23386	-1.38909	0.000322384	0.0039135
arahy.M5AJQH	-1.38849	0.00105872	0.0102995
arahy.3I432B	-1.3872	0.000208253	0.0027432
arahy.WQ1I1V	-1.38606	0.00370558	0.0281228
arahy.IBQC5J	-1.38596	9.3389e-05	0.00142719
arahy.6Z8VVX	-1.38454	0.00230168	0.0192699
arahy.J8PTSA	-1.38424	2.49296e-06	6.37254e-05
arahy.NQ88PQ	-1.38414	0.0020288	0.0173845
arahy.H5UTXB	-1.38365	0.000129536	0.00186794
arahy.FH7GLE	-1.38276	0.000228051	0.00294963
arahy.84QHVJ	-1.38098	0.00193115	0.0167167
arahy.5HS8E4	-1.37944	0.000519982	0.00581225
arahy.F1F1KH	-1.37635	0.000109003	0.00161672
arahy.PZT70L	-1.37625	1.73844e-05	0.000339831
arahy.F1289G	-1.37582	1.57009e-08	7.32339e-07
arahy.6VZ2KG	-1.37458	0.000226478	0.00293673
arahy.V3MY1S	-1.37405	0.00476188	0.0338231
arahy.YIK7D0	-1.37351	1.67961e-06	4.518e-05
arahy.HLF3VC	-1.37324	0.00176578	0.0155738
arahy.RTH5QB	-1.37295	0.00445344	0.0321991
arahy.X0JG6N	-1.37281	0.00754387	0.0480042
arahy.HM8GZE	-1.3725	4.53073e-07	1.43845e-05
arahy.W19Z82	-1.37246	1.36509e-08	6.44679e-07
arahy.UT015H	-1.37053	1.41293e-05	0.000284909
arahy.2TV28S	-1.37045	0.000425278	0.00493139
arahy.R97G74	-1.37033	0.00792112	0.0496747
arahy.Y6D0DJ	-1.37011	0.000961853	0.00952888
arahy.RWD4IB	-1.36895	1.38059e-05	0.000279201
arahy.9W4G6J	-1.36884	6.32457e-05	0.00103076
arahy.6P73LQ	-1.3686	1.04664e-05	0.000220574
arahy.ZUL46H	-1.36632	0.00138312	0.0127396
arahy.59SVGU	-1.36614	9.0799e-08	3.44299e-06
arahy.TK9752	-1.3657	5.29342e-10	3.4644e-08
arahy.B69GJJ	-1.36548	1.05031e-07	3.93242e-06
arahy.3U3PFL	-1.36399	0.000102035	0.00153528
arahy.9HBE4Z	-1.36376	3.58419e-08	1.5107e-06
arahy.CFJ0KE	-1.36077	4.49035e-10	3.00991e-08
arahy.GDD9UC	-1.36019	6.2952e-08	2.4728e-06
arahy.HIUE3G	-1.35976	0.00139251	0.0128148
arahy.LC2Y2P	-1.35827	0.00472622	0.033633
arahy.XRM29C	-1.35755	0.00716748	0.0460249
arahy.84DVUA	-1.35696	1.93501e-05	0.000370414
arahy.RCXU7Z	-1.35524	0.00618572	0.0411316
MSTRG.32122	-1.35293	8.70454e-09	4.30903e-07
arahy.GMVQ5Z	-1.35196	4.71197e-05	0.00080289
arahy.99IIFJ	-1.35094	0.00317236	0.024965
arahy.GW3WU5	-1.35032	8.65116e-06	0.000186965
arahy.WLS0EB	-1.34843	5.38103e-06	0.00012326
arahy.4J2USK	-1.34828	1.60532e-05	0.000317845
arahy.IT8P61	-1.34733	5.58105e-07	1.72834e-05
arahy.AJV249	-1.34613	0.000124171	0.00180623
arahy.NQ2DUC	-1.3441	0.002682	0.0217665
arahy.14I9QE	-1.34362	1.41621e-06	3.89778e-05
arahy.NCG1G9	-1.34304	0.000134626	0.00192831
MSTRG.11950	-1.34297	7.83468e-05	0.00122776
arahy.1SN7TU	-1.34139	9.46209e-06	0.000202385
arahy.EE1039	-1.3413	4.87399e-05	0.000824748
arahy.USN2J8	-1.34104	0.00011336	0.001673
arahy.XDH59H	-1.34029	4.71887e-05	0.000803406
arahy.AVS37Q	-1.34006	3.01715e-19	7.9866e-17
arahy.2V3W2X	-1.33891	0.00061144	0.0066243
arahy.NRX6WG	-1.33891	0.00061144	0.0066243
arahy.HQ66FD	-1.33868	0.000427767	0.00495473
arahy.577E3L	-1.33793	2.51566e-06	6.41585e-05
arahy.N2ITRL	-1.33301	0.000191656	0.00256771
arahy.E0PWE1	-1.33294	8.00064e-05	0.00125051
arahy.YSQ5WX	-1.3328	0.00134849	0.0124814
arahy.97U82P	-1.33233	0.000230415	0.00297478
arahy.USG1YY	-1.32971	0.000330582	0.00399032
arahy.LT4L2L	-1.32862	0.00218072	0.0184617
arahy.SZV0B9	-1.32847	0.00618467	0.0411316
arahy.Y1X04L	-1.32847	0.00618467	0.0411316
arahy.4HL1MH	-1.32757	9.86841e-07	2.84411e-05
arahy.79JQUH	-1.32724	1.8906e-09	1.09279e-07
arahy.X3B6RM	-1.32689	6.45369e-05	0.00104524
arahy.BBR22J	-1.32623	0.000546263	0.00604262
MSTRG.42294	-1.32533	0.000815712	0.00836628
arahy.ZWR48E	-1.32526	0.000792437	0.00819022
arahy.0J9HE3	-1.32476	0.000204527	0.00270785
arahy.GLQ2UZ	-1.32453	7.58846e-08	2.9255e-06
arahy.ES3MZU	-1.3238	0.000898157	0.00902915
MSTRG.29937	-1.32271	5.05849e-07	1.58422e-05
arahy.16GZH2	-1.32208	5.0205e-05	0.000845066
arahy.CZ32YF	-1.32096	0.00127178	0.0118826
arahy.P1GF9J	-1.32041	0.000859583	0.00872579
arahy.D6BAN0	-1.32034	6.03399e-19	1.54794e-16
arahy.6GA0DJ	-1.31938	0.00112589	0.0108087
arahy.180H6H	-1.3191	0.00280986	0.0226045
arahy.VJQ7J1	-1.31686	0.000432079	0.00499077
arahy.CUW7MQ	-1.3166	0.0034265	0.0265401
arahy.PYC0TU	-1.31652	3.4853e-07	1.14232e-05
arahy.7RM2L3	-1.31539	1.14124e-05	0.000236789
arahy.MK6ALS	-1.31496	0.00275515	0.0222346
arahy.ZKR6CY	-1.31159	0.0014274	0.0130865
arahy.CPQB8S	-1.30974	5.77552e-05	0.000953115
arahy.FX3851	-1.30803	4.96168e-07	1.5586e-05
arahy.QLUK9J	-1.30794	0.00244616	0.0201906
arahy.U2EY29	-1.30793	0.00789848	0.0495701
arahy.NCR4KV	-1.30692	1.53523e-06	4.17284e-05
arahy.XL3619	-1.30663	1.44606e-05	0.000291309
arahy.FH2UJN	-1.30605	4.11076e-06	9.70124e-05
arahy.NHHR58	-1.30263	6.84786e-05	0.00109796
arahy.B35K79	-1.30197	6.12748e-08	2.41148e-06
arahy.4I2UMQ	-1.30147	3.839e-06	9.1273e-05
arahy.VF6F79	-1.30106	0.00153275	0.0138718
arahy.QUE6U2	-1.30016	5.69685e-06	0.000129729
arahy.M8HB72	-1.29749	0.000683189	0.00724857
arahy.KKDJ1P	-1.29733	6.8077e-09	3.42935e-07
MSTRG.20144	-1.29633	1.66007e-11	1.43135e-09
arahy.60QTDI	-1.29624	3.42632e-11	2.78114e-09
MSTRG.7071	-1.29601	0.000110194	0.00163205
arahy.XJ9ES7	-1.29598	0.000133468	0.00191401
arahy.1EJ222	-1.29594	0.00153707	0.0139042
arahy.9NYV5L	-1.29578	0.000542772	0.00601521
arahy.HLS3VZ	-1.29578	3.43394e-06	8.29758e-05
arahy.EX05TD	-1.29483	3.59645e-05	0.000631186
arahy.E6ZCRX	-1.29433	0.00355634	0.0273042
MSTRG.43454	-1.29423	2.5989e-07	8.75973e-06
arahy.HK9TK1	-1.2942	8.80103e-05	0.0013592
arahy.CVXT9E	-1.29141	1.76657e-11	1.51025e-09
arahy.DPKT20	-1.29055	0.000359346	0.00428156
arahy.PRL389	-1.28981	7.48177e-05	0.00118271
arahy.F33TLL	-1.2892	4.11385e-07	1.32328e-05
arahy.CDIJ73	-1.28793	0.000412402	0.00480461
arahy.RJG4HY	-1.28636	0.000172465	0.00235958
arahy.HL6BNW	-1.28561	1.18614e-05	0.000245127
arahy.YDQ82R	-1.28555	0.000109686	0.00162569
MSTRG.16263	-1.2853	0.00430074	0.031401
arahy.T2PW0J	-1.28445	0.0023614	0.0196648
arahy.LA1I5A	-1.28391	0.000108356	0.00160942
arahy.F7W7FE	-1.28344	3.32131e-07	1.09635e-05
MSTRG.30154	-1.28255	0.00096363	0.00953966
arahy.P2X2DJ	-1.28237	0.00315125	0.0248412
arahy.QI2A5F	-1.2799	7.83398e-05	0.00122776
arahy.TH0EQN	-1.2798	2.55907e-06	6.49678e-05
arahy.2RU0FH	-1.27946	1.48245e-06	4.05056e-05
arahy.C0KAKD	-1.27802	2.2901e-08	1.02669e-06
MSTRG.33873	-1.27766	0.0016404	0.0146514
arahy.EK6TEN	-1.27748	0.00197424	0.0170082
arahy.YVU30U	-1.27745	0.00188556	0.0163869
arahy.7AY9Y3	-1.27741	1.73609e-11	1.48951e-09
arahy.EB1W4P	-1.2773	0.00128046	0.0119449
arahy.C516TH	-1.27633	2.00445e-08	9.09419e-07
arahy.996MJR	-1.27628	1.73684e-06	4.65085e-05
arahy.PFJT78	-1.27598	1.13339e-06	3.2108e-05
arahy.KRY3JC	-1.27572	0.000515514	0.00576851
arahy.SUKY79	-1.2755	0.000258725	0.00327018
arahy.WYWF3X	-1.27425	1.01039e-09	6.1211e-08
arahy.FRP7IX	-1.27421	0.000138198	0.00196758
arahy.QQ9WEM	-1.27404	0.000238663	0.00306394
arahy.D42ND1	-1.27389	0.000676509	0.00719791
arahy.8I90HC	-1.2737	0.00016	0.00221517
arahy.G490LK	-1.27336	8.06598e-07	2.38417e-05
arahy.07Q55L	-1.27246	3.02336e-06	7.46126e-05
arahy.KU1XN4	-1.27223	0.000432893	0.00499877
arahy.48J8BV	-1.27182	0.00589042	0.0396373
arahy.D9MA0I	-1.27172	8.28003e-06	0.000180068
arahy.CAI9RI	-1.2714	0.00182583	0.0159814
arahy.3M010D	-1.27104	1.04286e-10	7.75316e-09
arahy.T01IT8	-1.2707	0.00529675	0.0365417
arahy.24GIPR	-1.27058	0.000892908	0.00898291
arahy.H49T8T	-1.26985	9.68355e-07	2.80055e-05
arahy.3Q6I1N	-1.26968	0.000380157	0.00450194
arahy.L1V5WQ	-1.26908	0.00493873	0.0346986
arahy.Q8TRDX	-1.26894	0.00210469	0.0179166
arahy.59GG00	-1.26842	3.51043e-06	8.46336e-05
arahy.H9YJLH	-1.2682	1.33908e-06	3.72495e-05
arahy.HXWY1L	-1.26806	0.000251395	0.003196
arahy.A2TX9B	-1.2664	0.000596951	0.00649442
arahy.UHJV6M	-1.26492	2.25697e-05	0.000423847
arahy.HQGJ2Y	-1.26488	0.000537226	0.00596648
arahy.ALKQ9T	-1.26479	0.00605589	0.0405081
arahy.BV80JU	-1.26479	0.00605589	0.0405081
arahy.2WV311	-1.26391	0.00565327	0.038406
arahy.IRZ7G5	-1.26277	0.0022838	0.0191549
arahy.K6QUG2	-1.26239	0.00288377	0.0230935
arahy.N24EG7	-1.26022	1.81674e-07	6.39848e-06
arahy.D1503X	-1.25988	0.000544305	0.00602739
arahy.F1B1I5	-1.25987	0.000829921	0.00849106
arahy.MX0K57	-1.25772	1.0084e-11	8.97394e-10
arahy.VPGQ6L	-1.25739	0.00152549	0.0138181
arahy.FCRD5F	-1.25738	2.54478e-10	1.78044e-08
arahy.JWU5I5	-1.25685	2.769e-06	6.9407e-05
arahy.Y6BJG8	-1.25685	2.769e-06	6.9407e-05
arahy.KGKZ9D	-1.25431	8.40063e-09	4.17111e-07
arahy.KST8W5	-1.25401	0.000290604	0.00359798
arahy.9LN53N	-1.25376	0.00621219	0.0412776
arahy.Y38ELQ	-1.25308	0.00484351	0.0342274
arahy.T9D4U4	-1.25176	0.00174263	0.0154122
arahy.1X31DU	-1.24854	0.000911453	0.00913409
arahy.5NV7Q1	-1.24774	8.38549e-07	2.46983e-05
arahy.2YPY17	-1.24644	0.000643664	0.00690667
arahy.Z7UQGQ	-1.24608	0.00704386	0.0454277
arahy.229YTE	-1.246	0.000489873	0.00553675
MSTRG.16578	-1.24586	2.91209e-05	0.000523685
MSTRG.38157	-1.24572	0.000462198	0.00527996
arahy.T16V0S	-1.24522	3.43412e-06	8.29758e-05
arahy.XTWJ7M	-1.24497	9.34859e-07	2.72644e-05
arahy.QHL3N1	-1.2445	0.00759726	0.0482552
arahy.6X8TD8	-1.24389	8.36154e-06	0.000181271
arahy.U260GH	-1.24365	9.70823e-07	2.80573e-05
arahy.0FDZ3Y	-1.24297	0.000640194	0.00687134
arahy.1RS262	-1.24204	6.91972e-05	0.00110691
arahy.9H0YUK	-1.24201	0.00193636	0.0167411
arahy.KS9I1Q	-1.24187	0.000146102	0.0020577
arahy.USKV5G	-1.24068	0.00201865	0.0173178
arahy.V2AG0S	-1.24052	1.27588e-08	6.08079e-07
arahy.YZD8WZ	-1.23967	0.000200085	0.00265835
arahy.SCV28L	-1.23833	0.00283258	0.0227565
arahy.39ZYJP	-1.23704	0.00131597	0.012224
arahy.1IW9Y2	-1.23701	2.45224e-05	0.000454121
arahy.L76SLB	-1.23638	0.000649599	0.00696329
arahy.1KA2VU	-1.23484	0.00131387	0.0122073
arahy.YY1VWG	-1.23417	2.22627e-07	7.63735e-06
arahy.QG049K	-1.23163	0.00263176	0.0214499
arahy.N0NSHG	-1.2316	1.03271e-06	2.95784e-05
arahy.AN5TC9	-1.23122	2.18301e-07	7.51025e-06
arahy.T2XHT6	-1.23118	4.6404e-05	0.000791668
arahy.NKX1H6	-1.23023	0.000287495	0.00356657
arahy.TL9E5R	-1.23019	0.00476641	0.0338379
arahy.2V5SL7	-1.22825	1.36357e-07	4.96659e-06
arahy.4P7P8S	-1.22787	9.02719e-05	0.0013864
arahy.G3162F	-1.22723	0.00786038	0.0493832
MSTRG.1544	-1.22665	7.27036e-09	3.64474e-07
arahy.A1R83D	-1.22652	0.00345567	0.0266842
arahy.0M314Q	-1.22616	2.55608e-08	1.12889e-06
arahy.5QUI8A	-1.22576	8.48692e-07	2.49793e-05
arahy.STS3CH	-1.22481	0.000210824	0.00276916
arahy.15A7AE	-1.22325	0.00150147	0.0136527
arahy.95EUB8	-1.22269	0.000177665	0.00241451
arahy.UZSK02	-1.22257	2.45251e-07	8.32712e-06
arahy.660VQ8	-1.22204	1.653e-05	0.000325888
arahy.40BCK9	-1.2209	2.1705e-05	0.00040983
arahy.8BA7G9	-1.22035	5.24795e-05	0.000879434
arahy.FA8BAD	-1.22018	1.44454e-06	3.96785e-05
arahy.NB98VA	-1.21994	0.00758574	0.0482411
arahy.QX8C58	-1.21915	4.3198e-05	0.00074154
arahy.AM5T3N	-1.21887	0.000151729	0.00212099
arahy.0J46GK	-1.21875	5.77708e-05	0.000953115
arahy.CC2PZJ	-1.2186	0.000568732	0.00624133
MSTRG.36072	-1.21791	2.86459e-05	0.000516484
arahy.QC4E5N	-1.21763	5.37025e-05	0.000897396
arahy.R7PSBK	-1.21524	0.00226537	0.0190403
arahy.7XZ4E2	-1.21474	2.51414e-05	0.00046376
arahy.350VGV	-1.21462	9.48312e-06	0.000202627
arahy.TJCL76	-1.21429	0.0004073	0.00476145
arahy.TUB397	-1.21314	0.000114408	0.00168666
arahy.BNTD67	-1.21288	5.22517e-10	3.43053e-08
arahy.H82QG0	-1.21214	0.000774225	0.00802794
arahy.5P5CS5	-1.21139	2.12998e-06	5.5638e-05
arahy.1RV5TE	-1.2096	7.69756e-10	4.82508e-08
arahy.KQ5WJ5	-1.20945	0.0022059	0.0186407
arahy.35WB4A	-1.20941	2.14912e-05	0.000406534
arahy.CC9CW3	-1.20785	6.43977e-07	1.96787e-05
arahy.0LE775	-1.20705	1.38968e-07	5.04821e-06
arahy.V8SBL2	-1.20701	1.47561e-08	6.92936e-07
arahy.986X03	-1.2069	8.00091e-05	0.00125051
arahy.N36KAR	-1.20592	0.000142977	0.00202246
arahy.Y5DXIN	-1.20513	0.00623086	0.0413656
arahy.0KDF2J	-1.20497	7.69788e-08	2.95945e-06
arahy.DG98DY	-1.20456	1.68481e-05	0.000330746
arahy.0SEA8T	-1.20419	0.00344094	0.0266099
arahy.YQ8C5N	-1.204	4.26431e-06	0.000100181
arahy.ILI21V	-1.20314	0.00259221	0.0211941
arahy.P5LGTJ	-1.20214	2.36465e-05	0.000440093
arahy.VX9EXA	-1.20209	6.87114e-07	2.08299e-05
arahy.1JF53G	-1.20011	0.000187513	0.00252277
arahy.LJ14K1	-1.19995	2.61204e-08	1.14993e-06
arahy.UBHF2S	-1.19902	7.38028e-06	0.000162715
arahy.F4TQ07	-1.19778	6.82933e-06	0.000152101
arahy.BY45PL	-1.19757	2.85809e-08	1.23987e-06
arahy.QL5SEX	-1.19746	0.00393586	0.0293663
arahy.980X4K	-1.19719	0.00493366	0.0346875
arahy.28P3YA	-1.19693	0.00483932	0.0342036
arahy.R419CW	-1.19662	7.9268e-08	3.03343e-06
arahy.52GVK1	-1.19454	3.71176e-06	8.88065e-05
MSTRG.43783	-1.19304	0.00121842	0.01149
arahy.FVU0Y6	-1.19223	6.65962e-06	0.0001488
arahy.FH2JLQ	-1.19059	3.34941e-05	0.000594015
arahy.BELI5P	-1.19054	1.04765e-05	0.000220677
arahy.D36X90	-1.19037	8.94034e-05	0.00137561
arahy.N0QBSQ	-1.1902	0.00100747	0.00991459
arahy.BEF3I8	-1.18759	0.00162709	0.0145545
arahy.PYW4YI	-1.1867	0.00264423	0.0215221
arahy.XW3T4W	-1.18641	0.00363152	0.0277125
arahy.40B6EU	-1.1848	0.000568215	0.00623895
arahy.SHHZ9W	-1.18466	3.54251e-05	0.000622937
arahy.ZZF2CC	-1.1837	4.38449e-05	0.000751712
arahy.8EF0QG	-1.18363	0.000711781	0.00748694
arahy.2EN3G3	-1.18348	2.28116e-05	0.000427236
arahy.4UMK2V	-1.18336	0.0045497	0.0327172
arahy.SIB906	-1.18281	0.00229902	0.0192554
arahy.B493EM	-1.18266	2.04732e-05	0.000389582
arahy.LND7SA	-1.18188	0.00178326	0.0156847
arahy.UYA8EU	-1.17953	0.00378298	0.0285471
arahy.XV2LY8	-1.17688	0.0035715	0.0273802
arahy.QIB13C	-1.17664	7.29095e-07	2.19092e-05
arahy.RP0VY0	-1.17664	7.29095e-07	2.19092e-05
arahy.V7KKLB	-1.17647	2.48544e-05	0.000459281
arahy.DW8A2N	-1.17533	0.000144911	0.00204564
arahy.IX2F7U	-1.17515	0.00296803	0.0236526
arahy.J8M6QI	-1.17378	0.000438783	0.00504716
arahy.2968RG	-1.17333	0.000767986	0.00797719
arahy.J3GVLS	-1.17278	4.73804e-05	0.000806341
arahy.UN150X	-1.17275	0.00204668	0.0175247
arahy.Q70MCY	-1.17207	4.34667e-13	4.856e-11
arahy.EA09C8	-1.171	3.89158e-05	0.000678682
arahy.50NPKB	-1.17073	1.2397e-05	0.000254675
arahy.Z4CKFD	-1.16903	2.03545e-13	2.37615e-11
arahy.S2RI8T	-1.16843	1.71099e-11	1.4722e-09
arahy.5RQ1EV	-1.16729	4.27099e-07	1.36329e-05
arahy.NH81W7	-1.16692	0.000121645	0.00177509
arahy.P4EZ6L	-1.16652	0.00358855	0.0274805
arahy.QP96VZ	-1.16652	0.00358855	0.0274805
arahy.P6P8C4	-1.1659	1.08437e-06	3.09251e-05
arahy.RUK088	-1.16548	5.11942e-05	0.000860671
arahy.ZAZ04Q	-1.16521	0.00147449	0.0134441
arahy.AY9ABC	-1.1652	0.00600588	0.0402513
arahy.CAAH4K	-1.16488	0.00188314	0.0163715
arahy.60VMKJ	-1.16482	0.000545335	0.00603546
arahy.DMW9PU	-1.16428	2.95211e-05	0.000530422
arahy.GP7L65	-1.16426	0.000208972	0.00275093
arahy.L6AUEE	-1.16342	1.15325e-06	3.26484e-05
arahy.EBVI20	-1.16198	2.26062e-06	5.84625e-05
arahy.VK1ZUB	-1.16134	0.000120636	0.00176221
arahy.S2YQMD	-1.16064	1.78639e-05	0.000347081
arahy.BV73BK	-1.15981	0.000142266	0.00201613
arahy.62N0H4	-1.15911	0.000341544	0.00410238
arahy.W0KZJE	-1.15905	0.000606114	0.00658162
arahy.R87Y2D	-1.15662	0.000316302	0.0038515
arahy.02J1VT	-1.15639	2.88212e-06	7.15093e-05
arahy.FN4EG0	-1.15489	0.000469419	0.00534628
arahy.PU36IS	-1.15448	6.96447e-05	0.00111227
arahy.LTHX1H	-1.15443	8.37248e-07	2.46774e-05
arahy.6KNU8H	-1.15438	6.30426e-05	0.00102785
arahy.SYI62H	-1.15364	3.42344e-07	1.12381e-05
arahy.EII57S	-1.152	0.00764842	0.0484575
arahy.LSW4XK	-1.15161	5.57188e-05	0.000924029
arahy.TJVH1M	-1.15135	3.76389e-09	2.01058e-07
arahy.Z477D9	-1.15012	0.00285506	0.0228928
arahy.IHX1LT	-1.14951	4.89967e-06	0.000113393
arahy.FDEL0C	-1.14945	0.000140291	0.00199192
MSTRG.8029	-1.14934	1.0414e-06	2.97843e-05
MSTRG.37093	-1.1489	2.79887e-06	6.9987e-05
arahy.B6P3TA	-1.14869	1.83356e-05	0.000354423
MSTRG.16432	-1.14867	0.00418572	0.0307429
arahy.QW336R	-1.1486	0.00317074	0.0249574
arahy.2T81X8	-1.14759	2.79799e-15	4.32275e-13
arahy.485YT8	-1.14629	0.00567235	0.0384688
arahy.7U6XXD	-1.14617	5.81935e-07	1.79013e-05
MSTRG.35887	-1.14608	0.00470461	0.0335022
arahy.L43R8Z	-1.14564	4.00942e-07	1.2947e-05
arahy.B3E7YS	-1.145	0.00106359	0.0103369
arahy.SYC9J3	-1.14491	0.000749483	0.00782018
arahy.B30RUE	-1.14447	0.00413486	0.0304628
arahy.PJHC0L	-1.14319	6.62734e-07	2.01793e-05
arahy.9RI59H	-1.14246	1.12056e-07	4.16915e-06
arahy.I6EE1A	-1.14175	1.96286e-06	5.17605e-05
arahy.QG96AP	-1.14149	6.07396e-06	0.000137189
arahy.D3DSYK	-1.14114	1.99413e-05	0.000380505
arahy.D0VJ3P	-1.14064	4.96695e-06	0.000114488
arahy.E4S27Z	-1.14055	5.89313e-05	0.000970335
arahy.YQG5EZ	-1.14052	1.28226e-10	9.44848e-09
arahy.BJVD1V	-1.13958	2.22783e-06	5.77942e-05
arahy.XUG5FC	-1.13913	4.39311e-06	0.000102858
arahy.INFL9I	-1.13899	0.000205053	0.00271308
arahy.W9Z2JH	-1.1375	0.00252537	0.0207403
arahy.F1F8UR	-1.13683	2.07138e-06	5.43807e-05
arahy.KSKG2Y	-1.1362	0.000177232	0.00240942
MSTRG.11070	-1.13616	0.000970602	0.00960182
arahy.E0KVE0	-1.13606	0.00664372	0.0434061
arahy.YW30D2	-1.13548	0.000341348	0.00410121
arahy.11MF2K	-1.13463	0.000450635	0.00516918
arahy.D15RR9	-1.13425	0.000160012	0.00221517
arahy.XP4MBM	-1.13309	0.000137897	0.00196599
arahy.UPED9V	-1.13213	1.66656e-09	9.74132e-08
arahy.XZZ787	-1.13161	0.00186418	0.0162282
arahy.9U5P9R	-1.1316	8.82537e-05	0.00136169
arahy.ZFBN83	-1.13152	6.12797e-06	0.000138184
MSTRG.27442	-1.13142	0.00185046	0.0161379
arahy.MZFE1X	-1.13107	1.03383e-05	0.000218318
arahy.XCJ6I1	-1.12956	0.00122222	0.0115153
arahy.R7E06Z	-1.12898	0.000193365	0.00258584
arahy.MTEL0D	-1.12856	8.05347e-06	0.000175603
MSTRG.48259	-1.12838	0.00378169	0.0285471
arahy.58CB50	-1.12832	2.12371e-05	0.000402348
arahy.S2N7G4	-1.12761	1.77157e-06	4.7256e-05
arahy.N09E78	-1.12708	0.00395881	0.0294846
arahy.05E95R	-1.12582	9.48448e-05	0.00144329
arahy.4VY1XX	-1.12559	6.08935e-07	1.8649e-05
arahy.X9QM54	-1.12421	3.77981e-06	9.00718e-05
arahy.ZM1B8D	-1.12384	0.00155497	0.0140424
arahy.86JG4M	-1.1238	1.81911e-06	4.83069e-05
arahy.FF070U	-1.12347	0.000471686	0.00537063
arahy.UK0SNM	-1.12259	1.30447e-06	3.63842e-05
arahy.JTL6YC	-1.12258	0.000204228	0.00270476
arahy.GXY79M	-1.12051	0.00340214	0.0263984
arahy.KK8UF0	-1.12003	0.00330821	0.0258141
arahy.MEQI9D	-1.11853	5.3405e-09	2.75709e-07
arahy.BITW79	-1.11774	0.00263489	0.0214628
arahy.29DZAQ	-1.11757	0.000100844	0.00151958
arahy.FIK9JS	-1.1173	0.00745422	0.0475106
arahy.6C9V7B	-1.11708	8.37972e-06	0.000181571
arahy.07YELL	-1.11634	0.00195187	0.0168434
arahy.AT5BZQ	-1.11599	7.18231e-06	0.000159025
arahy.D5XWDC	-1.11507	0.000117941	0.00173059
MSTRG.45344	-1.11472	0.00265036	0.0215635
MSTRG.29919	-1.11407	0.000582721	0.00636627
arahy.GP9GZC	-1.1131	0.000187413	0.00252277
arahy.WVY9VA	-1.11295	4.97139e-05	0.000837818
arahy.3JZK2J	-1.11253	0.00020622	0.00272419
arahy.J91B8N	-1.11253	0.00020622	0.00272419
arahy.B8VX3Q	-1.11139	5.24279e-10	3.43668e-08
arahy.H3Z9GC	-1.10914	3.84742e-06	9.13685e-05
arahy.MSL63E	-1.10914	3.84742e-06	9.13685e-05
arahy.WC4CIS	-1.10871	1.99032e-12	2.01255e-10
arahy.5NK7V3	-1.10845	0.00093812	0.00934052
arahy.5MB0W9	-1.10839	0.000857932	0.00871489
arahy.67NNK3	-1.10774	8.18197e-07	2.41673e-05
arahy.VRU113	-1.10601	0.00016854	0.00231473
MSTRG.22805	-1.10501	0.00389787	0.0291509
arahy.B6CCGS	-1.10387	6.93478e-05	0.0011089
arahy.0J7BXD	-1.10368	0.000245024	0.00313708
arahy.E1XKB5	-1.10309	0.0011736	0.0111585
arahy.BCZ98G	-1.10263	0.000208763	0.00274904
arahy.FAMU12	-1.10262	0.000320677	0.00389565
arahy.6YRH08	-1.10234	0.00523019	0.0362096
arahy.0LT2FK	-1.10154	1.00559e-08	4.91083e-07
arahy.V592UR	-1.10118	0.000249533	0.00318012
arahy.HMZA4Q	-1.10019	1.28539e-05	0.000262763
arahy.EXJG55	-1.0994	7.36419e-07	2.20814e-05
arahy.0UWS9P	-1.09822	0.00489227	0.0344899
arahy.UJ54IQ	-1.0976	1.51214e-05	0.00030155
arahy.B6TC73	-1.09749	0.000323152	0.00391999
arahy.8F6M4K	-1.09421	0.000200798	0.00266612
arahy.YQRH3K	-1.09259	0.000488631	0.00552572
arahy.EAF0L1	-1.09195	0.00202726	0.017376
arahy.59P1C9	-1.09087	0.000511213	0.00572963
arahy.J72S78	-1.08923	0.000787644	0.00815082
arahy.L6WGFW	-1.08882	0.00104452	0.0102131
arahy.WK148I	-1.0881	1.23844e-09	7.3938e-08
arahy.YQM1P4	-1.08786	0.00766905	0.0485481
arahy.H70GWQ	-1.08767	0.0015007	0.0136502
MSTRG.33092	-1.08746	4.75356e-05	0.000808649
arahy.9A4JNA	-1.08704	0.000340445	0.00409273
arahy.L0QN5H	-1.08674	5.98251e-05	0.00098194
arahy.YQ2HRW	-1.08592	2.01103e-06	5.28965e-05
arahy.657ZKM	-1.0852	0.00708847	0.0456369
arahy.M06WYC	-1.0851	0.00011318	0.00167152
arahy.V8JY38	-1.08501	9.78562e-05	0.00148261
arahy.742XN0	-1.08472	1.61673e-05	0.000319665
arahy.068WTC	-1.08452	0.00016522	0.00227817
arahy.2500MY	-1.08367	0.000334053	0.00402403
arahy.I4JYF5	-1.08365	0.000309218	0.00377886
arahy.DYP0WQ	-1.0826	7.08554e-06	0.000157217
arahy.FS6JVA	-1.08188	0.00151408	0.0137392
arahy.9GLC3X	-1.07982	0.000639032	0.00686941
arahy.TJWA8Z	-1.07964	1.60357e-06	4.33872e-05
arahy.3MHK8M	-1.07895	1.89596e-05	0.000363609
arahy.SJW8XV	-1.07846	1.8746e-07	6.56886e-06
arahy.FDXU13	-1.07833	8.43006e-09	4.18073e-07
arahy.JWR0C3	-1.07701	0.000478622	0.00542878
arahy.0PNK8Q	-1.0764	6.82823e-05	0.00109523
arahy.LPHW23	-1.07638	2.35358e-08	1.04949e-06
MSTRG.20764	-1.07636	0.00105925	0.0103022
arahy.L85IH5	-1.07576	0.000584847	0.00638447
arahy.091A4A	-1.07534	0.0028362	0.0227811
arahy.59MIJM	-1.0745	0.000324694	0.00393639
arahy.18TD37	-1.07339	3.39864e-05	0.000601295
arahy.82UWY2	-1.07339	3.39864e-05	0.000601295
arahy.9W0VPA	-1.073	0.00191534	0.0165902
arahy.AHDT32	-1.07211	7.19202e-07	2.16746e-05
arahy.N0DIBZ	-1.0705	0.00406312	0.0300569
arahy.6B5FLC	-1.0698	7.44959e-07	2.22572e-05
MSTRG.25843	-1.06957	0.000120229	0.00175848
arahy.EC2XF8	-1.06913	3.54992e-05	0.00062381
arahy.D4P2JU	-1.06839	0.00535398	0.0368429
arahy.6IR4P8	-1.06709	1.3946e-08	6.57868e-07
arahy.240NKR	-1.06679	0.00149002	0.0135619
arahy.EFS6DB	-1.06654	0.000938799	0.00934504
arahy.M2DJJT	-1.06562	0.00024727	0.00315805
arahy.040H4U	-1.06551	0.000258987	0.0032705
arahy.G6LTG1	-1.06507	0.00170066	0.0150763
arahy.FSAY7I	-1.06405	5.0188e-05	0.000845066
arahy.R3KIKB	-1.06279	4.63901e-09	2.42812e-07
arahy.9R8UEA	-1.0627	0.00536325	0.0368635
arahy.R7E7C4	-1.06265	1.53169e-05	0.000304572
arahy.I3KG3W	-1.06202	0.00433663	0.0316075
arahy.UK09FV	-1.06147	0.000845462	0.00862247
arahy.8EFC3U	-1.0614	0.00333205	0.0259514
arahy.GWHQ4I	-1.06101	0.00138022	0.0127241
arahy.V9MVEL	-1.06023	0.0015057	0.0136717
arahy.C1DBA7	-1.06017	4.58982e-05	0.000783479
arahy.SV62YW	-1.05935	3.90187e-09	2.07098e-07
arahy.L6NNIX	-1.05767	0.00307601	0.0243589
arahy.97EWTL	-1.05666	0.000393414	0.00462384
MSTRG.49100	-1.05665	0.000768562	0.00798117
arahy.Y2LWD9	-1.05658	0.000720119	0.00755934
arahy.46HUUA	-1.05572	0.000138913	0.00197574
arahy.P1I5J2	-1.05548	0.000460894	0.00526949
arahy.6J517B	-1.05544	9.12559e-05	0.00139945
arahy.IX0T6E	-1.05543	0.00744489	0.0474689
arahy.4VZ14Z	-1.05434	2.86725e-05	0.000516738
arahy.8G10A0	-1.05334	0.000247034	0.003156
MSTRG.33986	-1.0512	0.000326217	0.00395255
arahy.QLKH66	-1.05103	0.00256747	0.021029
arahy.H9FJ3E	-1.05036	1.71441e-07	6.11057e-06
arahy.IT2E5A	-1.04997	0.00214699	0.0182244
arahy.X7VZNI	-1.04997	0.00214699	0.0182244
arahy.3HD1EN	-1.0498	4.65281e-07	1.47047e-05
arahy.HC6UN0	-1.04953	0.000196799	0.00262392
arahy.HI2JIU	-1.04898	8.73407e-05	0.00135188
arahy.MX7F3A	-1.04844	3.90298e-05	0.000680195
arahy.C4X96D	-1.04791	8.44253e-14	1.03195e-11
arahy.XJZ826	-1.04777	9.60251e-07	2.78696e-05
arahy.F3RJIU	-1.04741	3.84323e-07	1.24587e-05
arahy.XP5L8X	-1.04704	0.00436407	0.0317574
arahy.8GTF30	-1.04687	0.000183386	0.00247929
arahy.BI3DJP	-1.04655	0.000531046	0.00591524
arahy.F5HUEH	-1.04637	4.23516e-07	1.35496e-05
arahy.GVRL8L	-1.04603	0.000338938	0.00407696
arahy.Y86I8S	-1.04577	2.88424e-10	2.00111e-08
arahy.3E8U0T	-1.04546	0.00242892	0.0200843
arahy.U4WGIZ	-1.04391	0.00646585	0.0424643
arahy.804D1R	-1.04332	0.000959585	0.00951548
MSTRG.25469	-1.04307	8.03928e-05	0.00125509
arahy.8YTQ3G	-1.04206	8.87298e-06	0.000190964
arahy.FEP1JN	-1.04202	0.000809683	0.00832293
arahy.G8AKQI	-1.04202	0.000809683	0.00832293
arahy.72Y1Y4	-1.0415	1.90534e-05	0.00036524
arahy.A4VS3L	-1.03981	0.00159161	0.0142909
arahy.Z6MEWL	-1.03891	0.00510501	0.0355614
arahy.JSL8JQ	-1.03774	0.000148849	0.00208846
arahy.P456AJ	-1.0371	0.00476428	0.0338286
arahy.EN97M4	-1.03653	0.000161513	0.00223298
arahy.WT9QCD	-1.03616	6.27873e-06	0.000141276
arahy.BK260Y	-1.03598	0.00685592	0.0444778
arahy.J0RZ19	-1.0359	5.46107e-06	0.00012477
arahy.ABBA5Z	-1.03552	0.00131891	0.0122377
arahy.XIN792	-1.03473	2.78701e-09	1.55054e-07
arahy.D99XSD	-1.03471	1.76006e-05	0.000343089
MSTRG.24988	-1.03458	0.00165522	0.0147521
arahy.4E0G5V	-1.03422	0.00152068	0.0137806
arahy.W17ZP3	-1.03404	0.00154234	0.0139438
arahy.JL4J5C	-1.03384	0.00540718	0.0370576
arahy.A3CFJS	-1.03349	7.63054e-06	0.00016761
MSTRG.24361	-1.03344	0.000417823	0.00485851
arahy.DL5MW3	-1.03336	0.00634039	0.0418387
arahy.KIDE1I	-1.03329	0.000842328	0.00859683
MSTRG.27748	-1.0331	0.00038367	0.0045311
arahy.JHMF4W	-1.03244	3.60919e-05	0.000633155
arahy.X8LT49	-1.0301	0.00134564	0.0124634
arahy.K55J2B	-1.02994	0.00423492	0.0310276
arahy.X1N656	-1.02921	0.00156417	0.0141102
arahy.HA8IQE	-1.02898	7.387e-07	2.21338e-05
MSTRG.36610	-1.02897	0.000372032	0.00441625
arahy.67CBH9	-1.02857	0.00511562	0.0356114
MSTRG.9268	-1.02602	0.00311326	0.0245884
arahy.IBI25X	-1.02466	0.000423236	0.00491183
arahy.012SKZ	-1.02432	1.5138e-06	4.12537e-05
arahy.JACH1V	-1.02417	0.00122307	0.0115207
arahy.0Z8YFF	-1.02403	0.00024685	0.00315538
arahy.AV7YP7	-1.02349	7.08893e-07	2.1395e-05
arahy.EKF4XY	-1.02216	0.0063851	0.0420469
MSTRG.44454	-1.02088	1.19579e-06	3.36922e-05
arahy.8393AT	-1.02085	0.00157751	0.0142058
arahy.D25GB4	-1.02003	1.10208e-08	5.31956e-07
arahy.FS695C	-1.02003	1.10208e-08	5.31956e-07
arahy.QJ0ED0	-1.01908	0.00689088	0.0446591
arahy.7R6UVA	-1.01777	1.34236e-06	3.73159e-05
arahy.8NC01M	-1.0177	0.000436928	0.00502721
arahy.22X1UZ	-1.01739	0.00154305	0.0139438
[truncated: 1,360 more rows]
