# Supplementary material for: Transcriptome analysis of pod mutant reveals plant hormones are important regulators in controlling pod size in peanut (Arachis hypogaea L.)
Source: PeerJ. 2022 Feb 28;10:e12965. doi: 10.7717/peerj.12965 (PMC8893032; doi:10.7717/peerj.12965)
Supplement: Table S1 [file peerj-10-12965-s002.xlsx]

## Sheet: Sheet2
Table S1. The gene-specific primers for qRT-PCR
Gene ID	Primer sequence (5'-3')
arahy.7MK8W0-F	AGCAGATCACTCCCCAGGAT
arahy.7MK8W0-R	CCCATGGCTTCACTCTACCA
arahy.V5BWWI-F	GAGTTAATGGCGGAAGGGCT
arahy.V5BWWI-R	ATTTCAGGGCAAGCAGGGTA
arahy.Q5B35H-F	CAGATCGCGGGCTGGG
arahy.Q5B35H-R	TGGAAGACGCTCCTCCAAAC
arahy.J64Z1K-F	GGCACCGGAGAATGATGCTA
arahy.J64Z1K-R	TCGCCGGTAATTCACAGACA
arahy.X0DYQH-F	AAAAGGGCGACGTTGCTTTC
arahy.X0DYQH-R	TGCATCGTTCAGTGCTTCCT
arahy.SXH82X-F	ACCGTCCTCCTTTTGACGTT
arahy.SXH82X-R	CTGTGGAATGGAATAAGGCAGC
arahy.A43ZUL-F	CACCACTCTCATCGCCAACT
arahy.A43ZUL-R	AATTGTCTGTGTGTGGGGCT
arahy.P2ZBX8-F	AGCAGTGGAAATGGACCGAA
arahy.P2ZBX8-R	TACCAGAAGAAGAAGTAGCAGACG
arahy.VW0TTK-F	CCCCTCCTTCCAAGGCAAAG
arahy.VW0TTK-R	AAGGTGCTCCATCCATGCTC
arahy.PSG53D-F	TGGGCATCACCATCAACG
arahy.PSG53D-R	GCGTGACAAGTGGCTTCTATG
