# Supplementary material for: Transcriptome analysis of pod mutant reveals plant hormones are important regulators in controlling pod size in peanut (Arachis hypogaea L.)
Source: PeerJ. 2022 Feb 28;10:e12965. doi: 10.7717/peerj.12965 (PMC8893032; doi:10.7717/peerj.12965)
Supplement: Table S2 [file peerj-10-12965-s003.xlsx]

## Sheet: Sheet1
Table S2 The significantly enriched terms in biological processes
*: FDR = false discovery rate. Adjusted for multiple tests. FDR < 0.05 is considered to be statistically significant
GO ID	Description	Genes	P-value	FDR*
GO:0005975	carbohydrate metabolic process	379	8.98303e-17	1.13096e-13
GO:0044283	small molecule biosynthetic process	151	3.33495e-11	2.09935e-08
GO:0044262	cellular carbohydrate metabolic process	106	2.44836e-09	5.13747e-07
GO:0016053	organic acid biosynthetic process	126	2.39158e-09	5.13747e-07
GO:0046394	carboxylic acid biosynthetic process	126	2.39158e-09	5.13747e-07
GO:0044281	small molecule metabolic process	388	1.84669e-09	5.13747e-07
GO:0009664	plant-type cell wall organization	33	5.07893e-09	7.99296e-07
GO:0071669	plant-type cell wall organization or biogenesis	33	5.07893e-09	7.99296e-07
GO:0044711	single-organism biosynthetic process	287	1.71218e-08	2.39515e-06
GO:0006082	organic acid metabolic process	245	4.84735e-08	6.10281e-06
GO:0019752	carboxylic acid metabolic process	243	7.38492e-08	8.45237e-06
GO:0043436	oxoacid metabolic process	243	8.48657e-08	8.90383e-06
GO:0008652	cellular amino acid biosynthetic process	83	9.38477e-08	9.08879e-06
GO:0006270	DNA replication initiation	12	2.16937e-07	1.95088e-05
GO:0009064	glutamine family amino acid metabolic process	27	1.66912e-06	0.000140095
GO:1901605	alpha-amino acid metabolic process	96	2.09201e-06	0.000164615
GO:0007017	microtubule-based process	72	2.39951e-06	0.000177705
GO:0044710	single-organism metabolic process	1024	3.08353e-06	0.000215676
GO:0006520	cellular amino acid metabolic process	138	9.54319e-06	0.000632362
GO:0006261	DNA-dependent DNA replication	12	1.12617e-05	0.000675167
GO:0006536	glutamate metabolic process	12	1.12617e-05	0.000675167
GO:0009073	aromatic amino acid family biosynthetic process	23	1.28789e-05	0.000704978
GO:0045229	external encapsulating structure organization	63	1.26776e-05	0.000704978
GO:0009072	aromatic amino acid family metabolic process	31	1.47489e-05	0.0007737
GO:0044264	cellular polysaccharide metabolic process	61	1.78332e-05	0.000898081
GO:0009069	serine family amino acid metabolic process	33	2.09816e-05	0.001016
GO:0071555	cell wall organization	62	2.20159e-05	0.00102659
GO:0006560	proline metabolic process	9	2.47514e-05	0.00107455
GO:0046165	alcohol biosynthetic process	9	2.47514e-05	0.00107455
GO:0005976	polysaccharide metabolic process	65	2.75442e-05	0.00115594
GO:0032787	monocarboxylic acid metabolic process	87	4.10423e-05	0.00166685
GO:0050790	regulation of catalytic activity	44	4.70735e-05	0.00185205
GO:0009607	response to biotic stimulus	37	4.97661e-05	0.00189865
GO:0009084	glutamine family amino acid biosynthetic process	17	5.93939e-05	0.00213649
GO:0009070	serine family amino acid biosynthetic process	18	5.77835e-05	0.00213649
GO:0051258	protein polymerization	35	6.94059e-05	0.00242728
GO:0006631	fatty acid metabolic process	49	8.24695e-05	0.00266228
GO:0006073	cellular glucan metabolic process	55	8.20476e-05	0.00266228
GO:0044042	glucan metabolic process	55	8.20476e-05	0.00266228
GO:0065009	regulation of molecular function	44	8.50404e-05	0.00267665
GO:0006537	glutamate biosynthetic process	7	9.71212e-05	0.00284362
GO:0043650	dicarboxylic acid biosynthetic process	7	9.71212e-05	0.00284362
GO:1901617	organic hydroxy compound biosynthetic process	12	9.63691e-05	0.00284362
GO:0044723	single-organism carbohydrate metabolic process	142	0.00010037	0.00287196
GO:0006563	L-serine metabolic process	23	0.000171724	0.00480447
GO:0006564	L-serine biosynthetic process	8	0.000229939	0.00583951
GO:0043648	dicarboxylic acid metabolic process	29	0.000224423	0.00583951
GO:0043086	negative regulation of catalytic activity	30	0.000226913	0.00583951
GO:0044092	negative regulation of molecular function	30	0.000226913	0.00583951
GO:0006633	fatty acid biosynthetic process	43	0.000231911	0.00583951
GO:1901606	alpha-amino acid catabolic process	17	0.000276939	0.00683659
GO:0046417	chorismate metabolic process	5	0.000313431	0.00758865
GO:0006021	inositol biosynthetic process	4	0.000415521	0.00934181
GO:0006562	proline catabolic process	4	0.000415521	0.00934181
GO:0006656	phosphatidylcholine biosynthetic process	4	0.000415521	0.00934181
GO:0046173	polyol biosynthetic process	4	0.000415521	0.00934181
GO:0034637	cellular carbohydrate biosynthetic process	56	0.00046874	0.0103534
GO:1901607	alpha-amino acid biosynthetic process	62	0.000477737	0.0103702
GO:0009065	glutamine family amino acid catabolic process	7	0.00049218	0.0105026
GO:0016054	organic acid catabolic process	20	0.000515351	0.0106365
GO:0046395	carboxylic acid catabolic process	20	0.000515351	0.0106365
GO:0030244	cellulose biosynthetic process	26	0.000530167	0.0107658
GO:0009063	cellular amino acid catabolic process	18	0.000539117	0.0107738
GO:0016051	carbohydrate biosynthetic process	61	0.000560528	0.0110266
GO:0006071	glycerol metabolic process	9	0.000579647	0.0110572
GO:0019400	alditol metabolic process	9	0.000579647	0.0110572
GO:1901615	organic hydroxy compound metabolic process	35	0.000710333	0.0133479
GO:0071554	cell wall organization or biogenesis	75	0.000809662	0.0149906
GO:0030243	cellulose metabolic process	26	0.00104782	0.0191189
GO:0009225	nucleotide-sugar metabolic process	6	0.00204414	0.036608
GO:0010817	regulation of hormone levels	10	0.00206447	0.036608
GO:0009892	negative regulation of metabolic process	36	0.0021114	0.0369202
GO:0072330	monocarboxylic acid biosynthetic process	44	0.00223786	0.0385953
GO:0048519	negative regulation of biological process	38	0.00236243	0.0400358
GO:0033692	cellular polysaccharide biosynthetic process	43	0.00238497	0.0400358
GO:0006544	glycine metabolic process	18	0.00244738	0.0405428
GO:0046939	nucleotide phosphorylation	35	0.00250774	0.0410031
GO:0000271	polysaccharide biosynthetic process	43	0.00263785	0.0425776
GO:0006730	one-carbon metabolic process	7	0.00269768	0.0429921
GO:0006221	pyrimidine nucleotide biosynthetic process	13	0.00276662	0.0435397
