# Supplementary material for: Transcriptome analysis of pod mutant reveals plant hormones are important regulators in controlling pod size in peanut (Arachis hypogaea L.)
Source: PeerJ. 2022 Feb 28;10:e12965. doi: 10.7717/peerj.12965 (PMC8893032; doi:10.7717/peerj.12965)
Supplement: Table S3 [file peerj-10-12965-s004.xlsx]

## Sheet: Sheet1
Table S3 The different expression genes related to cell expansion between WT and spm pods at stage 2
Gene	spm2	WTS2	Description	Symbol
arahy.Z02ZAB	0.27	4.367	xyloglucan endotransglucosylase/hydrolase 32	XTH31
arahy.T3CFRI	0.237	3.123	xyloglucan endotransglucosylase/hydrolase 32	XTH31
MSTRG.11911	2.133	1.837	PREDICTED: probable xyloglucan glycosyltransferase 5 [Arachis duranensis]	CSLC5
arahy.63MW46	0.153	17	xyloglucan endotransglucosylase/hydrolase 5	XTH1
arahy.B1AFV9	0.233	21.313	xyloglucan endotransglucosylase/hydrolase 5	XTH1
arahy.XX5QBN	0.187	4.383	probable xyloglucan glycosyltransferase 5-like [Glycine max]	CSLA2
arahy.NZL2UA	0.25	5.217	probable xyloglucan glycosyltransferase 5-like [Glycine max]	CSLA2
arahy.4LL9T6	0.367	6.76	xyloglucan endotransglucosylase/hydrolase 6	XTH6
arahy.4KDK0P	0.463	2.73	xyloglucan endotransglucosylase/hydrolase 9	XTH9
arahy.WHN6X0	9.16	37.463	xyloglucan galactosyltransferase KATAMARI1 homolog [Glycine max]	GT14
arahy.RC54CN	2.26	9.113	probable xyloglucan glycosyltransferase 12-like [Glycine max]	CSLC12
arahy.ZJ180B	25.003	95.937	xyloglucan endotransglucosylase/hydrolase 9	XTH9
arahy.H0JUKR	1.697	6.053	probable xyloglucan glycosyltransferase 12-like [Glycine max]	CSLC12
arahy.SW7ZQM	6.033	16.433	xyloglucan xylosyltransferase 5	XXT3
arahy.GBAH2S	6.603	17.61	xyloglucan galactosyltransferase KATAMARI1-like [Glycine max]	Os03g0144800
arahy.T8CSYB	1.017	2.497	xyloglucan glycosyltransferase 4-like [Glycine max]	CSLA2
arahy.RN7KHK	8.95	21.63	xyloglucan endotransglucosylase/hydrolase 9	XTH9
arahy.A194LB	7.057	16.163	xyloglucan galactosyltransferase KATAMARI1-like [Glycine max]	Os03g0144800
arahy.I4AHF2	111.143	248.823	xyloglucan endotransglucosylase/hydrolase 16	XTH16
arahy.FLM0C5	4.283	8.86	probable xyloglucan glycosyltransferase 6-like [Glycine max]	CSLC6
arahy.U6Y5FL	2.36	4.777	probable xyloglucan glycosyltransferase 6-like [Glycine max]	CSLC6
arahy.BWTU0I	192.18	63.2	Xyloglucan endotransglucosylase/hydrolase family protein	XTH23
arahy.3BDP96	56.387	12.033	Xyloglucan endotransglucosylase/hydrolase family protein	XTH23
arahy.8EK9UN	2.397	2.35	xyloglucan endotransglucosylase/hydrolase 15	XTH15
arahy.WK29PC	4.813	6.833	xyloglucan endotransglucosylase/hydrolase 15	XTH15
arahy.VDQ89P	114.817	398.09	xyloglucan endotransglucosylase/hydrolase 24	XTH24
arahy.K91ZD2	2.217	1.747	xyloglucan endotransglucosylase/hydrolase 28	XTH27
arahy.D3GWAL	1.36	1.633	xyloglucan endotransglucosylase/hydrolase 28	XTH27
arahy.4SWV4Y	0.87	5.81	xyloglucan endotransglucosylase/hydrolase 32	XTH31
arahy.31HZRQ	0.993	2.867	xyloglucan endotransglucosylase/hydrolase 32	XTH31
arahy.A5JVQI	0.993	2.867	xyloglucan endotransglucosylase/hydrolase 32	XTH31
arahy.S6SHXY	0	1.007	cellulose synthase-like B4	CSLH1
arahy.T5D8XB	5.997	26.077	alpha-1,4-glucan-protein synthase [UDP-forming]-like protein	UPTG
arahy.V0EZ88	7.15	29.283	alpha-1,4-glucan-protein synthase [UDP-forming]-like protein	UPTG
arahy.1NMA8N	25.997	66.803	alpha-1,4-glucan-protein synthase [UDP-forming]-like protein	UPTG
arahy.VA5NBW	3.347	7.66	Cell wall protein-like n=3 Tax=Oryza RepID=Q8H3Y9_ORYSJ	COBL7
arahy.70S30W	2.443	8.263	cellulose synthase 1	CESA1
arahy.0SMS9Y	3.917	16.21	cellulose synthase 6	CESA2
arahy.8Q6EW7	4.073	12.77	cellulose synthase 6	CESA2
arahy.W0EE9C	7.917	28.757	Cellulose synthase family protein	CESA3
arahy.C1ELGE	16.077	47.213	Cellulose synthase family protein	CESA3
arahy.GDN2XA	35.457	17	cellulose synthase like E1	CSLE6
arahy.Z32ZXD	0.483	17.023	cellulose synthase like G2	CSLG2
arahy.82KWKE	0.81	19.39	cellulose synthase like G2	CSLG2
arahy.F8E2AM	0.523	3.053	cellulose synthase-like B4	CSLH1
arahy.KGFT34	0.983	3.49	cellulose synthase-like B4	CSLH1
arahy.JQ7JP5	2.917	12.593	cellulose synthase-like D3	CSLD2
arahy.V1EM73	2.917	12.593	cellulose synthase-like D3	CSLD2
arahy.JNS4CJ	4.143	10.91	cellulose synthase-like D3	CSLD2
arahy.6M56FL	3.907	10.18	cellulose synthase-like D3	CSLD2
arahy.LNBI6T	0.797	5.323	cellulose synthase-like D5	CSLD5
arahy.T9QV62	0.597	5.783	COBRA-like protein 4-like [Glycine max]	COBL4
arahy.Y3R0BI	0.6	4.77	COBRA-like protein 4-like [Glycine max]	COBL4
arahy.59WLWN	0.2	4.23	protein COBRA [Glycine max]	COB
arahy.SZ5KAK	5.053	7.867	cellulose synthase 6	CESA2
arahy.X6X5DV	9.387	13.143	cellulose synthase 6	CESA2
arahy.KQ35EQ	1.07	7.703	cellulose synthase A4	CESA4
arahy.GVD2R3	0.997	4.777	cellulose synthase A4	CESA4
arahy.J8M6QI	8.203	35.607	Cellulose synthase family protein	CESA3
arahy.62N0H4	7.503	33.003	cellulose synthase family protein	CESA3
arahy.6J517B	2.503	4.74	cellulose synthase like G2	CSLG2
arahy27A6A2	0.001	0.92	Plant invertase/pectin methylesterase inhibitor superfamily	--
arahy.PRK495	11.63	34.92	Plant invertase/pectin methylesterase inhibitor superfamily protein	PMEI3
arahy.FMR9EU	38.23	82.94	Plant invertase/pectin methylesterase inhibitor superfamily protein	PMEI3
arahy.PZQY06	4.39	26.19	Plant invertase/pectin methylesterase inhibitor superfamily protein	PMEI3
arahy.LTQN7Y	8.55	6.79	Plant invertase/pectin methylesterase inhibitor superfamily protein	PMEI3
arahy.JDR7GI	1.23	4.81	Beta-galactosidase 10	BGAL10
arahy.CB4TML	3.55	12.4	microtubule-associated protein	CLASP
arahy.73DRY2	4.6	11.71	microtubule-associated protein	CLASP
arahy.AX54M2	0.507	5.873	protein LONGIFOLIA 2-like isoform X2 [Glycine max]	LNG2
arahy.6FF65R	0.347	3.573	protein LONGIFOLIA 2-like isoform X2 [Glycine max]	LNG2
arahy.HRE7NK	0.1	0.633	protein LONGIFOLIA 2-like isoform X2 [Glycine max]	LNG2
arahy.ZRKH1E	0.25	1.097	protein LONGIFOLIA 2-like isoform X2 [Glycine max]	LNG2
