# Supplementary material for: Transcriptome analysis of pod mutant reveals plant hormones are important regulators in controlling pod size in peanut (Arachis hypogaea L.)
Source: PeerJ. 2022 Feb 28;10:e12965. doi: 10.7717/peerj.12965 (PMC8893032; doi:10.7717/peerj.12965)
Supplement: Table S4 [file peerj-10-12965-s005.xlsx]

## Sheet: Sheet1
Table S4 The expression of DEGs related to auxin, GA, and BR showed significantly differences between WT and spm pods at stage S2
Trait	Gene	FC (spmS1/WTS1)	FC (spmS2/WTS2)	FC (spmS3/WTS3)	P-value-S2	FDR-S2	Symbol
auxin	arahy.2G66YZ	0.922257	0.0130839	0.227154	1.1389e-11	8.89098e-10	GH3.1
	arahy.0UWS9P	0.49629	0.303153	0.466879	0.00206013	0.0110805	GH3.6
	arahy.KL0ZPB	1.49303	0.0950081	5.4023	8.98306e-08	2.60313e-06	GH3.6
	arahy.7FN9BJ	0.636949	0.372001	0.886283	0.000219681	0.001829	GH3.6
	arahy.2F1JWB	0.865596	0.462302	0.620226	0.00807168	0.0323009	GH3.6
	arahy.U4WGIZ	0.710931	0.312925	0.485072	0.00617873	0.0262277	TAR2
	arahy.J0ARNE	0.631115	0.0364146	0.914894	0.00929736	0.0360891	LAX1
	arahy.RGXR1X	0.67341	0.0236407	0.265537	0.000984588	0.00612041	LAX5
	arahy.LRS80B	0.752749	0.105	0.152091	0.00935727	0.0362673	LAX5
	arahy.32WLBW	0.731695	0.293155	1.68811	0.000463755	0.00335248	PILS1
	arahy.R5QH0H	0.731695	0.293155	1.68811	0.000463755	0.00335248	PILS1
	arahy.6E8WTG	1.59627	2.64343	1.09724	4.10846e-05	0.000466476	PILS2
	arahy.SXH82X	1.75919	2.97414	1.22643	2.53448e-06	4.53204e-05	PILS2
	arahy.72M57I	0.694984	0.326591	0.284324	2.63948e-05	0.000323693	PIN1
	arahy.L76SLB	0.914321	0.410431	0.424506	0.00350688	0.016819	PIN1
	arahy.FCRD5F	1.08297	0.327994	0.418311	6.72641e-10	3.55842e-08	PIN3
	arahy.2QV4RS	1.19936	0.28342	0.295756	4.02951e-14	5.30222e-12	PIN4
	arahy.P2ZBX8	0.900821	0.20189	0.373076	2.36011e-05	0.000294348	ABCB1
	arahy.W0RWMP	0.874845	0.341521	0.603068	0.00147691	0.00850025	ABCB1
	arahy.I8RYIH	1.04612	0.371277	0.603383	0.00287683	0.0144081	ABCB1
	arahy.UMX69X	1.04612	0.371277	0.603383	0.00287683	0.0144081	ABCB1
	arahy.6J7SPU	1.19382	0.239029	2.08929	3.92056e-05	0.000449263	ABCB19
	arahy.WT01JD	1.61966	0.29668	1.71689	0.00803208	0.0321691	ABCB19
	arahy.TEE9DH	0.896173	2.58624	1.03762	1.66316e-06	3.17444e-05	TIR1
	arahy.0BZR9P	0.864583	0.0540815	0.0522705	4.08683e-11	2.79732e-09	AUX22
	arahy.8QDS1I	0.409819	0.0589251	0.444942	4.05854e-08	1.30159e-06	AUX22
	arahy.KRC5M1	0.43143	0.0970464	0.26498	0.000264794	0.00213011	AUX22
	arahy.VW0TTK	0.888275	0.241216	0.345063	2.49268e-11	1.79403e-09	AUX22B
	arahy.5P5CS5	0.911314	0.368369	0.431822	0.000214289	0.00179341	AUX22B
	arahy.UBHF2S	0.652734	0.132071	0.435566	1.29818e-13	1.53259e-11	AUX28
	arahy.K6ZRIQ	0.521352	0.408148	0.312452	0.0127944	0.0461567	IAA4
	arahy.N2VZ44	1.3816	0.295788	0.667295	7.67879e-07	1.63465e-05	IAA8
	arahy.F753KD	1.22211	0.400091	0.956854	0.000455578	0.00330026	IAA8
	arahy.P8YRGA	0.924382	0.26307	0.265677	6.94496e-06	0.000106032	IAA9
	arahy.XR81AR	0.967661	0.2887	0.56987	3.10545e-05	0.000369744	IAA9
	arahy.5EK85H	0.787153	0.308151	0.684538	0.000137063	0.00124367	IAA9
	arahy.XA7C26	1.11249	0.32774	0.611418	5.06397e-05	0.000554758	IAA9
	MSTRG.16824	0.533267	0.0377273	0.0775364	4.43851e-13	4.76009e-11	IAA11
	arahy.MDB4JZ	0.336868	0.224412	0.293169	0.00187832	0.0103053	IAA13
	arahy.QUY0YV	0.998634	0.497663	0.795685	6.3774e-09	2.60182e-07	IAA14
	arahy.5RC9P7	0.834037	2.93608	1.90257	1.88635e-07	4.88523e-06	IAA26
	arahy.F330XL	0.690464	3.36498	1.83724	7.73847e-07	1.64343e-05	IAA26
	arahy.86T4WJ	0.648877	2.57258	1.36642	5.36006e-08	1.65292e-06	ARF9
	arahy.29DZAQ	0.968421	0.437287	0.46087	0.000554666	0.00386864	ARF10
	arahy.5ECK1G	0.91999	0.157726	0.308371	8.82452e-16	1.47054e-13	AIR12
	arahy.8B51UP	1.02329	0.00205482	0.134126	1.34202e-10	8.3065e-09	ARG7
	arahy.S1G93A	2.34409	3.10606	4.17593	1.82845e-08	6.49356e-07	DRM1
	arahy.H8XLFU	3.2146	3.27953	3.00547	1.08718e-06	2.19294e-05	DRM1
	arahy.RY2Y1Z	1.63738	4.66846	2.85148	4.52613e-14	5.889e-12	DRM1
	arahy.Q5B35H	1.53975	5.33395	2.1981	3.23753e-16	5.91866e-14	DRM1
GA	arahy.JGC745	1.46734	0.0310216	1	0.00582778	0.0250969	RSI-1
	arahy.K28R5D	1.51272	0.0381098	1.08969	0.0138467	0.0491106	RSI-1
	arahy.F1TUFL	0.428368	0.0136674	0.174089	5.20893e-08	1.61551e-06	GASA4
	arahy.6SHE48	0.187941	0.00259887	NA	1.06987e-08	4.10941e-07	GASA6
	arahy.VJ6NUA	0.154985	0.00510315	NA	1.73034e-08	6.20103e-07	GASA6
	arahy.V89RV5	0.922177	0.0301923	0.325203	8.06733e-06	0.000120272	GASA14
	arahy.XG1GJV	0.701399	0	2.25	1.71353e-05	0.0002245	SN1
	arahy.V4B8PK	0.894212	0.0492746	0.2675	0.000702378	0.00466176	SN1
	arahy.VES4LD	0.984992	0.0597633	0.884393	0.0106599	0.0401271	SN1
	arahy.V5BWWI	0.298276	0.0974556	0.218678	2.86049e-07	7.02986e-06	GA2OX1
	arahy.CLXM2V	0.371494	0.316589	0.65866	0.000588558	0.00405671	GA2OX1
	arahy.2861FR	0.956611	0.0323712	0.117857	1.20005e-08	4.55293e-07	GA20OX1
	arahy.QV02Z8	1.30271	0.00695489	0.196296	1.83213e-05	0.00023781	GA20OX2
	arahy.TS21P9	0	0	NA	1.80582e-07	4.70196e-06	20ox2
	arahy.S04SQP	1.42456	2.95938	1.58509	1.21895e-09	6.01522e-08	GID1B
	arahy.99WGGU	1.42906	3.22641	1.42158	6.00848e-14	7.6343e-12	GID1B
	arahy.WFXD84	1.22119	2.80863	2.65468	3.35356e-06	5.7408e-05	GID1C
	MSTRG.38017	1.41007	2.66992	2.26749	1.58879e-08	5.76045e-07	GID1C
	MSTRG.43101	1.88829	3.13538	0.749788	0.000402061	0.00298532	CIGR1
	arahy.R8ZZ7K	1.48702	0.389162	0.256573	0.00276923	0.0139897	GAI1
BR	MSTRG.9297	0.614203	0.259884	0.701724	0.00323964	0.0158157	DET2
	arahy.6CC1CL	0.775696	0.353972	0.862233	0.000115874	0.00108857	HMG1
	arahy.JEQD5V	0.814181	0.349707	1.18921	0.00267158	0.0136114	HMG1
	arahy.5H33RN	0.869793	0.245773	0.749886	3.99007e-05	0.000455301	SMT1
	arahy.8BL5SS	0.859175	0.240998	0.84991	1.78638e-05	0.000232918	SMT1
	arahy.PSG53D	0	0	0	9.1687e-20	3.05579e-17	SMT2
	MSTRG.41556	0.726454	0.445412	0.965849	0.000282891	0.00224566	SMT2
	arahy.66GL51	0.703854	0.0616184	3.7	0.000193728	0.0016525	CYP90A1
	arahy.Q94UE0	0.351975	0.0916546	0.548872	0.000125619	0.00116173	CYP90A1
	arahy.B5JY05	0.44409	0.211815	0.193146	2.06875e-09	9.72154e-08	CYP90A1
	arahy.M3F96W	0.496929	0.236561	0.207382	2.06416e-05	0.000263196	CYP90A1
	arahy.MA1Z2D	0.854481	0.222333	1.31847	0.00121942	0.00727439	CYP90B1
	arahy.7AH9CA	1.95716	0.354311	0.471338	0.000586467	0.00404423	ROT3
	arahy.B5QQYI	1.57884	0.360421	0.477273	0.000533896	0.00375521	ROT3
	arahy.SPE8CT	1.23587	0.338806	0.271831	0.00295374	0.0147201	CYP90D1
	arahy.J201LF	1.24647	0.344573	0.28657	0.00719476	0.0295308	CYP90D1
	arahy.31R89H	1.02958	0	0	0.00737702	0.0300964	BA13
	arahy.JZF5VE	0.636201	0	0.291785	5.06649e-06	8.13196e-05	BA13
	arahy.CAAH4K	1.20572	0.309926	0.446	0.00179566	0.00993112	BAK1
	arahy.2LG1YU	0.354642	0.288854	0.679747	0.00108713	0.00662848	BKI1
	arahy.VUP14P	0	0.000315756	0.000300571	3.67914e-22	2.01623e-19	BSK1
	arahy.X0DYQH	1.07573	0.324626	0.911691	1.08605e-05	0.000154077	BSK3
	arahy.U75YPR	1.11537	0.482639	1.00758	0.000481523	0.00345013	BSK3
	arahy.A43ZUL	0.974469	0.453828	0.837543	2.08666e-05	0.000265439	BZR1
	arahy.CT2MPD	0.974469	0.453828	0.837543	2.08666e-05	0.000265439	BZR1
	arahy.7MK8W0	0.972014	2.19711	1.86208	5.84782e-05	0.000624522	BEH2
	MSTRG.30779	1.22053	0.438499	0.691913	0.00529018	0.0232415	CURL3
	arahy.Z700ZP	0.677548	0.486997	1.56695	0.00763477	0.030918	CYCD3-3
	arahy.SV5QUW	0.626117	0.0973703	0.490798	0.00158178	0.00896803	CYCD3-3
	arahy.69JDQK	0.827682	0.131933	0.407942	0.0045303	0.0205616	CYCD3-3
Note: FC: Fold change
