# Supplementary material for: Transcriptome analysis of pod mutant reveals plant hormones are important regulators in controlling pod size in peanut (Arachis hypogaea L.)
Source: PeerJ. 2022 Feb 28;10:e12965. doi: 10.7717/peerj.12965 (PMC8893032; doi:10.7717/peerj.12965)
Supplement: Table S5 [file peerj-10-12965-s006.xlsx]

## Sheet: Sheet1
Table S4 TF families involved in pod development in peanut
Gene ID	TF family	log2FC (S1)	log2FC (S2)	log2FC (S3)
arahy.KP68JR	AP2		-7.94642
arahy.QEK7F9	AP2		-2.24366	-2.38612
arahy.K6QUG2	AP2		-1.81155	-1.26239
arahy.YSN9W3	AP2		-1.76457
arahy.KDI7TH	AP2		-1.61775
arahy.00XS3D	AP2		1.04349
arahy.6MJ8Q6	AP2		1.49901
arahy.04ZIEQ	ARF	-2.06515
arahy.29DZAQ	ARF		-1.19353	-1.11757
arahy.86T4WJ	ARF		1.36316
arahy.SZV0B9	ARF			-1.32847
arahy.Y1X04L	ARF			-1.32847
arahy.F3RJIU	ARF			-1.04741
arahy.Q8HI94	ARF			1.06447
arahy.N36P5V	ARR-B		1.01325
arahy.UG2HRK	ARR-B		1.27889	1.11771
arahy.Q3RA0M	ARR-B		2.56327	2.63491
arahy.UB10Y8	ARR-B			1.10581
arahy.ISKM3Z	B3	-2.71484	-4.08746
arahy.NX8KLK	B3	-1.24299		-1.53263
arahy.85QZ10	B3		-7.69116
arahy.CH7PW0	B3		-4.02407
arahy.DRN59F	B3		-2.58329
arahy.28CQXC	B3		-2.43764	-2.02487
arahy.58L4GY	B3		-2.31107
arahy.ZJXJ55	B3		1.37237
arahy.B35230	B3			6.1964
arahy.QU4087	B3			6.1964
arahy.TZM64J	BBR-BPC		-1.44924
arahy.DH24MV	BBR-BPC		-1.26303
arahy.A43ZUL	BES1		-1.13966
arahy.CT2MPD	BES1		-1.13966
arahy.7MK8W0	BES1		1.13561
arahy.VRQ703	Bhlh	-7.84549
arahy.HR6FN8	Bhlh	-2.48239
arahy.U34X7W	Bhlh	-2.48054
arahy.1AZ5A9	Bhlh	-1.98633
arahy.3CP6K6	Bhlh	-1.98633
arahy.29A50M	Bhlh	-1.46506	-11.6012
arahy.V2ZUG7	Bhlh	-1.37173	-8.32193
arahy.J2FWCG	Bhlh	-1.10766
arahy.XN5C49	Bhlh	1.11396		1.62078
arahy.H47S4B	Bhlh	1.2266
arahy.8X298I	Bhlh	1.44592
arahy.D11Z9R	Bhlh	1.49695
arahy.VFS8MG	Bhlh	1.50746		1.87551
arahy.R4XPT2	Bhlh	1.68294		1.58496
arahy.48I8DT	Bhlh	2.35423		4.66838
arahy.00JV9G	Bhlh		-2.69555
arahy.577H6Y	Bhlh		-11.8244
arahy.DXN5ZD	Bhlh		-8.27612
arahy.WVIE7L	Bhlh		-6.86684
arahy.JFV18T	Bhlh		-4.59991
arahy.02IZMF	Bhlh		-3.64717
arahy.DY9DHP	Bhlh		-3.2384
arahy.I442D3	Bhlh		-3.22632	-1.70316
arahy.I9XM75	Bhlh		-3.17623
arahy.VUQ1KR	Bhlh		-3.08539	-1.41881
arahy.UDFT26	Bhlh		-2.68732
arahy.MB81X2	Bhlh		-2.53138	-3.24317
arahy.PE6L90	Bhlh		-2.37543
arahy.7E0N0H	Bhlh		-2.37248	-2.45328
arahy.1C4B0A	Bhlh		-2.36969
arahy.5MB0W9	Bhlh		-2.21465	-1.10839
arahy.QP9JCJ	Bhlh		-2.03457
arahy.X1PT0Q	Bhlh		-2.03457
arahy.35WB4A	Bhlh		-1.93076	-1.20941
arahy.UPU6LY	Bhlh		-1.88255
arahy.0RUU36	Bhlh		-1.75177
arahy.TWQ0V4	Bhlh		-1.73566
arahy.W9Z2JH	Bhlh		-1.73114	-1.1375
arahy.5BA4ES	Bhlh		-1.60686
arahy.MX4LCS	Bhlh		-1.60617
arahy.EG7BHI	Bhlh		-1.27129
arahy.160YLH	Bhlh		-1.23934
arahy.83FN4T	Bhlh		-1.23072	-1.84373
arahy.K68BG4	Bhlh		-1.20936
arahy.IJCM88	Bhlh		-1.12289
arahy.X9QM54	Bhlh		-1.06994	-1.12421
arahy.1K2NHD	Bhlh		-1.0631
arahy.SDDU5A	Bhlh		1.05619
arahy.V1RYJK	Bhlh		1.13548
arahy.I5HDSE	Bhlh		1.14109
arahy.J8HG2W	Bhlh		1.24874
arahy.40PIV4	Bhlh		1.26291
arahy.03LME3	Bhlh		1.26849
arahy.N7XQZF	Bhlh		1.46382
arahy.J0D1JF	Bhlh		1.49906	1.14034
arahy.DH6SQG	Bhlh		1.54533
arahy.830P15	Bhlh		1.64177	1.22882
arahy.YCXR19	Bhlh		1.68196
arahy.4C0G14	Bhlh		1.73798
arahy.YJCF5Y	Bhlh		1.87127	1.00474
arahy.ITUB3V	Bhlh		2.07342
arahy.HD7TF9	Bhlh		2.20097	1.34577
arahy.0I3NZ2	Bhlh		2.41761	2.07155
arahy.K29MSX	Bhlh			-7.38082
arahy.Y5CARX	Bhlh			-2.09899
arahy.H9FWK3	Bhlh			-1.92697
arahy.5IZP5X	Bhlh			-1.89921
arahy.ZD5CML	Bhlh			-1.89921
arahy.X3FWT9	Bhlh			-1.77662
arahy.H3TEND	Bhlh			-1.69054
arahy.N0BKZ2	Bhlh			-1.63595
arahy.SQH7P6	Bhlh			-1.42035
arahy.AJV249	Bhlh			-1.34613
arahy.NQPD42	Bhlh			1.47551
arahy.Z8D0NG	Bhlh			1.55631
arahy.P8DJ8N	Bhlh			1.86507
arahy.0ZB9Y5	Bhlh			2.15528
arahy.VA7IIE	bZIP	-13.6333	-8.69046	-15.4602
arahy.Z3D5KE	bZIP	-4.03637	-3.00459	-3.26078
arahy.AAI19J	bZIP	1.15851
arahy.B9A4XU	bZIP	1.27872	-2.39363
arahy.76FTKD	bZIP	1.36551	-1.92734	-1.4144
arahy.W16IV2	bZIP	1.48786	1.92399	2.31794
arahy.71DGVH	bZIP		-9.59495
arahy.F95VPU	bZIP		-6.7879
arahy.V67U6Z	bZIP		-6.54057
arahy.0BLG9X	bZIP		-5.87406
arahy.1A1ACU	bZIP		-3.23573	-3.21826
arahy.MHQ5U3	bZIP		-2.34129
arahy.5XCD2W	bZIP		-2.21249
arahy.R4ID1P	bZIP		-1.96578	-2.57469
arahy.4YG78R	bZIP		-1.68806
arahy.PHPT4F	bZIP		1.04046
arahy.1QMW5J	bZIP		1.07683
arahy.880YTL	bZIP		1.09684
arahy.470EJV	bZIP		1.14888
arahy.01LB4B	bZIP		1.2115
arahy.DM1BVQ	bZIP		1.58722
arahy.FUM12Z	bZIP		1.58722
arahy.1B2Z8C	bZIP		1.93788
arahy.9PR62B	bZIP		2.37707	3.11924
arahy.449CV2	bZIP			-1.75644
arahy.T95EUW	bZIP			-1.43366
arahy.0SEA8T	bZIP			-1.20419
arahy.980X4K	bZIP			-1.19719
arahy.S1DMKE	bZIP			-1.0111
arahy.EPRD9B	bZIP			1.44606
arahy.XZ9EX0	bZIP			1.53574
MSTRG.17616	bZIP	1.05109	-1.60754
arahy.6835ZM	C2H2	-9.51175	-9.01309	-8.67948
arahy.KM5KAV	C2H2	-1.00801
arahy.Y8ZFR1	C2H2	1.09165	1.46815	1.43431
arahy.U9954S	C2H2		-11.4322	-5.31206
arahy.LRN7UR	C2H2		-4.26303
arahy.TQHX8C	C2H2		-3.10753	-4.04803
arahy.60QMTC	C2H2		-2.90304
arahy.N4UYPZ	C2H2		-2.58496
arahy.A8Q4IW	C2H2		-2.53209
arahy.5FCQ1J	C2H2		-2.19451
arahy.908HV2	C2H2		-2.07943
arahy.LXQM1X	C2H2		-2.07823
arahy.RRM2UF	C2H2		-1.77374
arahy.369ZBB	C2H2		-1.45904
arahy.B4LZ3P	C2H2		-1.3295
arahy.60VMKJ	C2H2		-1.07955	-1.16482
arahy.IMP9EL	C2H2		1.0251
arahy.HV9XRS	C2H2		1.13975
arahy.4MT9SK	C2H2		1.17117
arahy.M5A3LZ	C2H2		1.24208
arahy.VGLF4N	C2H2		1.2835
arahy.T5C9EA	C2H2		1.31679	1.07497
arahy.1N9EHH	C2H2		1.35472
arahy.MG2JR8	C2H2		1.57505	1.2406
arahy.55B6KH	C2H2		3.32777
arahy.GE3CES	C2H2		3.34577
arahy.Y2SXNG	C2H2		8.38082
arahy.IGV1QM	C2H2			-4.2362
arahy.CAS3GS	C2H2			-1.40731
MSTRG.17911	C2H2	1.9154
MSTRG.17912	C2H2		1.40944	1.00605
MSTRG.6781	C2H2		-4.76553
arahy.H2AKHM	C3H	-11.5872	-11.8829	-12.0645
arahy.QW19KK	C3H		1.34473
arahy.6UMZ2R	C3H		2.40003	1.12738
arahy.2HI4J5	C3H		2.60244	1.29966
arahy.YQ2HRW	C3H			-1.08592
MSTRG.41056	C3H		1.20889
arahy.6EC1ZG	CAMTA		1.15161
arahy.WEZ503	CO-like	3.46949		1.16873
arahy.8MV22J	CO-like			-1.49881
arahy.ZUL46H	CO-like			-1.36632
arahy.VMK2JT	CPP		-3.10073
arahy.SA7CU8	CPP		-3.00987	-1.4301
arahy.79SPSS	CPP		-2.10154
arahy.B88PIA	CPP		-1.95072
arahy.46RN8V	CPP		1.07782
arahy.W9B7XJ	CPP		1.39188
arahy.UU73T8	DBB	-1.6568	-2.30323
arahy.IJP2R9	DBB		-1.67702
arahy.W2V9C7	DBB		-1.51331
arahy.PY0P22	DBB		-1.04865
arahy.Q6JUAH	DBB		1.54551	1.14938
arahy.NQ5KT7	Dof	-13.4173	-12.9156	-13.0073
arahy.Y4ERM2	Dof	-1.05603
arahy.9H8X3G	Dof	1.53031	-1.37851
arahy.VNR2QD	Dof	1.53031	-1.37851
arahy.3PAP3H	Dof		-1.62332
arahy.R1PH36	Dof		-1.19135	-1.40557
arahy.P4EZ6L	Dof		-1.0679	-1.16652
arahy.QP96VZ	Dof		-1.0679	-1.16652
arahy.GP1R7D	Dof		-1.01024	-1.77358
arahy.MQC2P6	Dof		1.38973	1.14435
arahy.B68HGA	Dof		1.44882
arahy.XUU1M8	Dof		1.55536
arahy.WJU1NN	Dof		1.90946
arahy.MKQQ3C	Dof			1.26351
arahy.ME2JXJ	Dof			1.30328
arahy.34G278	Dof			2.21759
MSTRG.31336	Dof			1.06819
arahy.T7DLBP	E2F/DP	-6.5597	-9.17991	-10.2605
arahy.J729H0	EIL		1.3029
arahy.S7XF8N	EIL		1.57728	1.22608
arahy.Q66BD2	ERF	-11.335	-10.0131
arahy.9T6609	ERF	-1.67859
arahy.ZL8GWI	ERF	-1.63209
arahy.GP73H9	ERF	-1.47684
arahy.V8I50K	ERF	-1.33307
arahy.XI0ITM	ERF	-1.01557
arahy.C7A6P7	ERF		-10.427
arahy.4XBE3K	ERF		-4.77635
arahy.MMJQ7K	ERF		-4.38977
arahy.KDEH1Y	ERF		-3.61566
arahy.9V08HM	ERF		-2.64386
arahy.P2AB97	ERF		-2.44823
arahy.X9M6WH	ERF		-2.07066
arahy.J0DG7J	ERF		1.0266
arahy.5KI8FH	ERF		1.14165
arahy.VJ8B3Q	ERF		1.40418
arahy.87AL67	ERF		1.40561
arahy.47NS3A	ERF		1.58235
arahy.ILN3K9	ERF		1.62933	1.45741
arahy.G0YQ1S	ERF		1.70883
arahy.57AKVM	ERF		1.88817
arahy.KF0N62	ERF		1.91133
arahy.73DHZN	ERF		2.04439
arahy.Y7XFN8	ERF		2.13387
arahy.2AHI7R	ERF		2.36257
arahy.WDSQ8J	ERF		4.13191	3.96758
arahy.0UF999	ERF		4.46467	3.07189
arahy.KD4831	ERF		4.61471	2.24207
arahy.GP7L65	ERF			-1.16426
arahy.X2S259	ERF			1.42653
arahy.I2ZHTU	ERF			1.65006
arahy.VUU22W	ERF			1.77584
MSTRG.17672	ERF		3.27448	2.15473
MSTRG.21481	ERF	1.33985
arahy.VV1Q05	FAR1		1.05987
arahy.G6Y5VA	FAR1		1.24846
MSTRG.13374	FAR1		1.63537
MSTRG.25469	FAR1		-1.03068	-1.04307
MSTRG.30239	FAR1		1.41352
MSTRG.3372	FAR1	2.58496		4.62936
MSTRG.34452	FAR1		1.09042
MSTRG.36610	FAR1	1.40599		-1.02897
MSTRG.9692	FAR1		2.65938	1.12815
arahy.A9PKKK	G2-like	1.02191
arahy.QX8C58	G2-like		-1.63728	-1.21915
arahy.1Z7GQF	G2-like		-1.26303	-1.81395
arahy.GRY8GW	G2-like		1.04532	1.05412
arahy.7L0GHA	G2-like		1.24113
arahy.ISGY16	G2-like		1.48487
arahy.X8J8BT	G2-like		1.6261
arahy.VJ5QJ8	G2-like		1.72638
arahy.23K5JN	G2-like		1.83279
arahy.69RPC9	G2-like		2.63631
arahy.USKV5G	G2-like			-1.24068
arahy.0U49HS	GATA	1.16272
arahy.GUPV5U	GATA		-2.60023
arahy.HHX0PC	GATA		-2.25327
arahy.I6JZDT	GATA		-1.07086
arahy.DG0T3J	GATA		2.11752	1.62972
arahy.KA6YJ2	GATA		2.68397	1.98179
arahy.C6NV9N	GATA			8.55714
MSTRG.13354	GATA			3.45675
arahy.C2E8GX	GRAS	-10.3851	-14.7257	-15.3523
arahy.GYJ6B7	GRAS		-3.56847	-9.31439
arahy.T0P5W2	GRAS		-1.94282	-1.52725
arahy.R8ZZ7K	GRAS		-1.36157	-1.96255
arahy.MTF7G2	GRAS		1.27091
arahy.G0Z736	GRAS		1.38936
arahy.8PQZ09	GRAS		3.152
arahy.D3JULP	GRAS		3.59455
arahy.56KTIF	GRAS			-1.00195
MSTRG.43101	GRAS		1.64869
arahy.E8HE72	GRF	-2.83188
arahy.95DHJ9	GRF	-1.3403		2.47738
arahy.HNU9BA	GRF		1.02305
arahy.EY9JW7	GRF		1.43832
arahy.HL76U9	GRF		1.43832
arahy.FF6C67	GRF		1.61331
arahy.AF8ALP	GRF		2.26117	3.97837
arahy.858S2J	GRF			1.29956
arahy.MSLW3U	GRF			2.7419
arahy.12HWWY	HD-ZIP	-11.0362
arahy.LXJ7K2	HD-ZIP	-2.31996	-1.29854
arahy.RF7AVT	HD-ZIP	-1.98194
arahy.0FU07W	HD-ZIP	-1.61702
arahy.QLUK9J	HD-ZIP	-1.36337	-2.16159	-1.30794
arahy.29D948	HD-ZIP	-1.01676
arahy.NX7S1R	HD-ZIP	1.17892
arahy.EBSD6D	HD-ZIP	1.27971
arahy.82QS9R	HD-ZIP		-2.24176
arahy.28P3YA	HD-ZIP		-1.53887	-1.19693
arahy.1E6H8M	HD-ZIP		-1.47837
arahy.L20P4L	HD-ZIP		-1.34507
arahy.PXWH2C	HD-ZIP		-1.12744
arahy.8F1G3L	HD-ZIP		-1.08274
arahy.BJY39S	HD-ZIP		-1.08274
arahy.0V6YW0	HD-ZIP		-1.06874
arahy.97AX4B	HD-ZIP		1.13996	1.73003
arahy.8QX1D7	HD-ZIP		1.59328
arahy.6EBR5V	HD-ZIP		2.06087	1.48051
arahy.FYS41P	HD-ZIP		3.1606	1.12155
arahy.BYTU3P	HD-ZIP			-4.17991
arahy.2EN3G3	HD-ZIP			-1.18348
arahy.240NKR	HD-ZIP			-1.06679
arahy.QD22BA	HD-ZIP			1.54314
arahy.LLR3FQ	HRT-like		-3.08092
arahy.M7PLWR	HSF	-10.7171	-10.0038	-9.29921
arahy.42KS26	HSF	-4.8009
arahy.PK48VF	HSF	-4.4185
arahy.ABBA5Z	HSF	-1.53043		-1.03552
arahy.FJH25Q	HSF	-1.28474		-1.42791
arahy.4L43B4	HSF	-1.09748		-1.46765
arahy.Q5BT9L	HSF		1.26564
arahy.7QKH3M	HSF		1.32098	1.37197
arahy.YFKM11	HSF		1.32098	1.37197
arahy.B3NTUN	HSF		1.89154
arahy.5FT298	HSF			-1.62256
arahy.8U41WB	HSF			-1.44347
arahy.W19Z82	HSF			-1.37246
arahy.GW3WU5	HSF			-1.35032
arahy.B8VX3Q	HSF			-1.11139
MSTRG.38952	HSF		1.1151
arahy.U9CUV0	LBD	-1.90975
arahy.YW2RJ0	LBD	1.02828	1.74468
arahy.H6YQSI	LBD		-2.82353
arahy.SEL59B	LBD		-2.6865
arahy.JIZ31U	LBD		-1.59352	-3.06514
arahy.DCW7NL	LBD		-1.42655	-1.51017
arahy.HDM8J3	LBD		-1.34999	-1.53693
arahy.C3HPWP	LBD		1.14923
arahy.Z62C6M	LBD		1.45633
arahy.ISYP38	LBD		1.59488
arahy.4BCY92	LBD			-3.5325
arahy.33GA7I	LBD			-3.24793
arahy.W6TWEB	LBD			-2.95842
arahy.8GTF30	LBD			-1.04687
MSTRG.42021	LBD	-2.14684
arahy.1C4AI2	LSD		-1.54553
arahy.5IH3PY	LSD		-1.54553
arahy.SC2RCC	MIKC	-9.75377	-11.5395	-11.9932
arahy.SJTD5W	MIKC	1.35412
arahy.5B6ZAR	MIKC		-3.11042	-1.78813
arahy.Z4CR3N	MIKC		-2.92177	-2.01459
arahy.MX0VEQ	MIKC		-2.36107	-2.0656
arahy.SGD688	MIKC		-2.35819
arahy.40TXUY	MIKC		-2.2935
arahy.HA5D83	MIKC		1.65208
arahy.5R195S	MIKC			-2.71379
arahy.9AY56M	M-type			-2.19438
arahy.D2034S	MYB	-4.89077
arahy.78V50A	MYB	-2.96246
arahy.IT30K9	MYB	-1.20876
arahy.PT27R6	MYB	-1.1072	-4.91427
arahy.H7T4NQ	MYB	1.32161	1.56769
arahy.44B081	MYB	1.55031	1.40426
arahy.QP982P	MYB		-9.63783
arahy.JGMV5U	MYB		-9.22078
arahy.67PIFF	MYB		-9.13785
arahy.M75BKX	MYB		-9.10329	-10.7895
arahy.I42E36	MYB		-3.72379
arahy.YRTL7F	MYB		-3.17812
arahy.2DQF79	MYB		-2.97888
arahy.55CRPX	MYB		-2.71319
arahy.K4CW46	MYB		-2.40248
arahy.B6Y69S	MYB		-2.183
arahy.T18AYA	MYB		-1.98599	-1.53778
arahy.CDS96U	MYB		-1.84663
arahy.12J3VU	MYB		-1.80223	-1.56861
arahy.2A56XJ	MYB		-1.6324
arahy.T82HCQ	MYB		-1.56259
arahy.DPKT20	MYB		-1.52894	-1.29055
arahy.WSM8QM	MYB		-1.25389
arahy.S8NMKG	MYB		-1.04757
arahy.0KDF2J	MYB		-1.01508	-1.20497
arahy.HJHY8E	MYB		1.00039
arahy.R6YD0H	MYB		1.00039
arahy.DV7QWZ	MYB		1.54724
arahy.TZP4F0	MYB			-4.26679
arahy.0VA8DK	MYB			-2.25334
arahy.W9RD48	MYB			-1.85466
arahy.I7UCTP	MYB			-1.6555
arahy.B69GJJ	MYB			-1.36548
arahy.9A4AY7	MYB			-1.00514
arahy.YFKH51	MYB			1.18572
arahy.LGQQ8W	MYB			1.77314
arahy.QI0PHV	MYB			2.26318
arahy.KF94VL	MYB			4.86507
arahy.006X4N	MYB-related			-1.01206
arahy.01A8MA	MYB-related
arahy.03I27S	MYB-related	1.46352
arahy.29NKFC	MYB-related			-2.47508
arahy.50S1PH	MYB-related		1.01653
arahy.53Z6YZ	MYB-related		1.23172	1.17454
arahy.6W2W8X	MYB-related		1.08891
arahy.6ZYP5I	MYB-related			1.30376
arahy.7MW9BK	MYB-related			-2.41674
arahy.7S9A5A	MYB-related			-1.43637
arahy.7W7N8S	MYB-related		2.24398	1.37042
arahy.9D2XZ1	MYB-related			1.90132
arahy.ACH06T	MYB-related		1.17964
arahy.CDIJ73	MYB-related			-1.28793
arahy.D1YJVB	MYB-related			-1.41883
arahy.D4IBRE	MYB-related		-1.65652
arahy.IB3UKS	MYB-related			1.04136
arahy.K64R7P	MYB-related			-1.83281
arahy.L85IH5	MYB-related			-1.07576
arahy.MB41E4	MYB-related			-2.11341
arahy.NV91PZ	MYB-related			1.04261
arahy.S7LJ0Z	MYB-related		-2.67665	-2.40991
arahy.SM0544	MYB-related		-1.12984
arahy.U2II3I	MYB-related		1.19666
MSTRG.16359	MYB-related			-4.07619
MSTRG.2367	TCP		-1.2326
MSTRG.48995	TCP		-4.05553
MSTRG.9979	ZF-HD	2.09331	3.36213	11.0201
arahy.LV3APC	NAC	1.46496
arahy.7GZ1C0	NAC	1.60108
arahy.FKL2A7	NAC		-3.87447
arahy.CTTQ97	NAC		-3.07529
arahy.90HG3Y	NAC		-3
arahy.QVEY1G	NAC		-2.98272
arahy.BX5EMB	NAC		-2.49333
arahy.UX5JN7	NAC		-2.37783	-1.51397
arahy.D4BTID	NAC		-1.77344
arahy.76LABN	NAC		-1.76296
arahy.U16Y2L	NAC		-1.76296
arahy.WB1HDB	NAC		-1.62409
arahy.8D109F	NAC		1.08099
arahy.A3J7SX	NAC		1.10911
arahy.NB8KRW	NAC		1.3593	2.14069
arahy.L9IK9Y	NAC		1.48547	2.02087
arahy.FU1JML	NAC		1.49699	1.53269
arahy.MGN032	NAC		1.54009
arahy.WF4CBH	NAC		1.54009
arahy.QZZL54	NAC		1.55709	2.14268
arahy.3N6K0N	NAC		2.79722
arahy.72Q128	NAC		4.08139	1.85244
arahy.AIPG34	NAC		4.16684	4.18536
arahy.S9FEUH	NAC		4.181	4.14996
arahy.T50ENK	NAC			-2.05585
arahy.YB9YM9	NAC			-1.84954
arahy.V6VDUM	NAC			-1.76644
arahy.T5AJQY	NAC			-1.56857
arahy.65HUV4	NAC			-1.44081
arahy.BEF3I8	NAC			-1.18759
arahy.9ZTQ0N	NAC			1.28198
arahy.K8VWCH	NF-YA		1.3049
arahy.RS70VX	NF-YA		1.63482
arahy.E0X5DU	NF-YA		1.72594	1.03475
arahy.HITK0G	NF-YA		1.72753
arahy.S6585G	NF-YA		2.14577
arahy.D0EVJ3	NF-YB		-1.47892
arahy.BTE5MM	NF-YB		1.0014
arahy.8XPX7R	NF-YB		1.76948
arahy.KZS5BJ	NF-YC		-1.14597
arahy.YA9X9Q	NF-YC		1.17804
arahy.9U8SPX	NF-YC		1.89904
arahy.8R729R	Nin-like	-10.9391	-10.5507	-10.9342
arahy.1E9R5B	Nin-like		1.30214
arahy.EX05TD	Nin-like			-1.29483
arahy.JSL8JQ	Nin-like			-1.03774
arahy.DEK8Z8	Nin-like			1.28898
arahy.PZJ7B1	RAV		1.26504	1.02489
arahy.QDL5QZ	RAV		1.69063	1.87783
arahy.R3D0LA	RAV		1.92642	1.30943
arahy.PDF2MW	RAV		2.10623
arahy.TYJ1PE	SBP	-1.16906
arahy.YYFQ06	SBP	-1.03659
arahy.MVBZ07	SBP	1.42614
arahy.GW0D9K	SBP		-4.05974
arahy.CR8XX2	SBP			1.2682
arahy.NWGY5G	SRS	-8.74819
arahy.RA3MKB	SRS	1.06093
arahy.BI3DJP	SRS	1.25244		-1.04655
arahy.94Z1HY	SRS	1.29705
arahy.H1I1DS	SRS		-1.29297
arahy.T9K83P	SRS		1.16993
arahy.USG1YY	SRS			-1.32971
arahy.H9G0X7	TALE	-11.8829	-10.0038	-9.45121
arahy.PU29YL	TALE	-1.66069	-2.58099	-2.32925
arahy.A8JEVC	TALE	-1.34597
arahy.V2YWYI	TALE		-4.15381
arahy.2S0QXG	TALE		-3.30378
arahy.B0V7RI	TALE		-3.19114
arahy.DWSH38	TALE		-1.93214
arahy.CFLV5S	TALE		-1.0749
arahy.U5Q1QL	TALE			2.41654
arahy.N9U68C	TCP		-10.1077
arahy.XF5UIG	TCP		1.08947
arahy.D15RR9	TCP			-1.13425
arahy.708L2Y	Trihelix		-1.62404
arahy.J58VLE	Trihelix		-1.36923
arahy.2968RG	Trihelix		-1.27009	-1.17333
arahy.6ZR463	Trihelix		1.13551
arahy.5ZVC70	Trihelix		1.14661
arahy.E570TZ	Trihelix		1.17688
arahy.IGA88J	Trihelix		1.23493	1.11419
arahy.PZXV1H	Trihelix		1.33027
arahy.3PZ9PI	Trihelix		1.74912
arahy.5MEL2D	Trihelix		1.9088	1.32462
arahy.XCJ6I1	Trihelix			-1.12956
arahy.WDZX9F	Trihelix			1.00396
arahy.Q5JGPT	Trihelix			1.60234
arahy.U4C9QK	Trihelix			1.60234
arahy.UQJP0C	WOX	-13.3681	-12.9955	-13.2137
arahy.9WG3Z1	WOX	2.63227	2.70598	2.24691
arahy.1P3WKU	WOX		-1.19484
arahy.PLVV0P	WOX			3.45526
arahy.206U1W	WRKY	-3.15094	-2.91693
arahy.77CZVH	WRKY	-3.02875	-2.38821	4.49573
arahy.2G4BRW	WRKY	-2.00434	-3.07489
arahy.5V6QPU	WRKY	-1.37137	1.51955
arahy.1B7IGJ	WRKY	-1.12899	1.38193
arahy.GYR78M	WRKY		-5.22721	-2.21223
arahy.HSJ5V9	WRKY		-4.45474
arahy.1T4KVN	WRKY		-2.48829
arahy.4IR4XJ	WRKY		-1.97575
arahy.F7CVY8	WRKY		-1.47376
arahy.XUAL01	WRKY		1.03882
arahy.DVQ9X5	WRKY		1.30227	1.19998
arahy.EJ82H8	WRKY		1.33184	1.21723
arahy.5041YP	WRKY		1.56104
arahy.A8EX91	WRKY		1.72202
arahy.A6JJY3	WRKY		1.86848
arahy.ZTD7SX	WRKY		5.17564	5.21501
arahy.9FGC6P	WRKY			-1.68966
arahy.091A4A	WRKY			-1.07534
arahy.D15G2D	WRKY			1.44631
arahy.R7E7C4	YABBY		-1.64229	-1.06265
arahy.K25LU1	YABBY		-1.62998
arahy.W7IKXG	YABBY		-1.03001
arahy.9P7KXX	ZF-HD		-1.14905
arahy.143U18	ZF-HD		-1.06249
arahy.T0ZIH1	ZF-HD		2.09723
arahy.Y09KZW	ZF-HD			3.53874
