# Supplementary material for: Transcriptome analysis of pod mutant reveals plant hormones are important regulators in controlling pod size in peanut (Arachis hypogaea L.)
Source: PeerJ. 2022 Feb 28;10:e12965. doi: 10.7717/peerj.12965 (PMC8893032; doi:10.7717/peerj.12965)
Supplement: Table S6 [file peerj-10-12965-s007.xlsx]

## Sheet: Sheet1
Table S5 The list of Genes in brown, red, and tan modules
Gene ID	Module	Symbol	Description
MSTRG.10106	brown	At5g15710	PREDICTED: F-box/kelch-repeat protein At5g15710 [Arachis duranensis]
MSTRG.10119	brown	At3g02360	PREDICTED: 6-phosphogluconate dehydrogenase, decarboxylating 3 [Arachis duranensis]
MSTRG.10179	brown	--	PREDICTED: putative disease resistance RPP13-like protein 1 [Arachis ipaensis]
MSTRG.10818	brown	ME1	PREDICTED: probable LRR receptor-like serine/threonine-protein kinase At5g63710 [Arachis duranensis]
MSTRG.10824	brown	--	PREDICTED: uncharacterized protein LOC107458173 [Arachis duranensis]
MSTRG.1085	brown	GLX2-2	PREDICTED: hydroxyacylglutathione hydrolase cytoplasmic [Arachis duranensis]
MSTRG.10906	brown	--	PREDICTED: protein IQ-DOMAIN 14-like [Arachis duranensis]
MSTRG.1094	brown	KNAT3	Homeobox protein knotted-1-like 3, partial [Anthurium amnicola]
MSTRG.1096	brown	--	PREDICTED: uncharacterized protein LOC107487705 [Arachis duranensis]
MSTRG.10961	brown	At1g60995	Nuf2 family protein [Populus trichocarpa]
MSTRG.11000	brown	--	PREDICTED: cyclic pyranopterin monophosphate synthase, mitochondrial-like [Arachis ipaensis]
MSTRG.11033	brown	--	-
MSTRG.11186	brown	--	PREDICTED: cyclic pyranopterin monophosphate synthase, mitochondrial-like [Arachis ipaensis]
MSTRG.1120	brown	--	-
MSTRG.11240	brown	--	PREDICTED: uncharacterized protein LOC107636340 [Arachis ipaensis]
MSTRG.11280	brown	surE	PREDICTED: 5'-nucleotidase SurE [Arachis duranensis]
MSTRG.1129	brown	--	-
MSTRG.11362	brown	PCR10	PREDICTED: protein PLANT CADMIUM RESISTANCE 10 isoform X1 [Arachis duranensis]
MSTRG.1140	brown	At1g63850	PREDICTED: BTB/POZ domain-containing protein At1g63850 [Arachis ipaensis]
MSTRG.1149	brown	--	PREDICTED: uric acid degradation bifunctional protein TTL-like [Arachis duranensis]
MSTRG.11514	brown	--	PREDICTED: uncharacterized protein LOC107607406 [Arachis ipaensis]
MSTRG.11530	brown	--	PREDICTED: transcription factor bHLH57 [Arachis ipaensis]
MSTRG.11588	brown	--	PREDICTED: uncharacterized protein LOC107482483 isoform X1 [Arachis duranensis]
MSTRG.11591	brown	--	PREDICTED: uncharacterized protein LOC107611873 [Arachis ipaensis]
MSTRG.11599	brown	--	-
MSTRG.11619	brown	--	PREDICTED: clathrin interactor EPSIN 1 [Arachis ipaensis]
MSTRG.11666	brown	CKX9	PREDICTED: cytokinin dehydrogenase 3-like [Arachis ipaensis]
MSTRG.11670	brown	--	PREDICTED: uncharacterized protein LOC107487000 [Arachis duranensis]
MSTRG.11687	brown	WRKY4	PREDICTED: WRKY transcription factor 44-like [Arachis duranensis]
MSTRG.11693	brown	--	PREDICTED: uncharacterized protein LOC107469686 [Arachis duranensis]
MSTRG.11696	brown	--	PREDICTED: uncharacterized protein LOC107614766 [Arachis ipaensis]
MSTRG.1170	brown	--	PREDICTED: uncharacterized protein LOC107489641 [Arachis duranensis]
MSTRG.11820	brown	--	PREDICTED: uncharacterized protein LOC107636928 [Arachis ipaensis]
MSTRG.11890	brown	--	PREDICTED: zinc finger BED domain-containing protein RICESLEEPER 2-like [Ipomoea nil]
MSTRG.11950	brown	--	hypothetical protein KK1_013249 [Cajanus cajan]
MSTRG.12062	brown	--	-
MSTRG.1207	brown	--	PREDICTED: uncharacterized protein LOC107646932 [Arachis ipaensis]
MSTRG.12181	brown	--	-
MSTRG.12224	brown	--	-
MSTRG.12232	brown	--	PREDICTED: serine/threonine-protein phosphatase 7 long form homolog [Arachis ipaensis]
MSTRG.12563	brown	--	PREDICTED: probable F-box protein At4g22165 [Arachis ipaensis]
MSTRG.1261	brown	--	-
MSTRG.12713	brown	--	PREDICTED: uncharacterized mitochondrial protein AtMg00310-like [Arachis ipaensis]
MSTRG.1304	brown	--	-
MSTRG.13079	brown	--	PREDICTED: dolichyl-diphosphooligosaccharide--protein glycosyltransferase subunit DAD1-like [Arachis ipaensis]
MSTRG.13220	brown	--	PREDICTED: uncharacterized protein LOC107628535 [Arachis ipaensis]
MSTRG.13302	brown	CP29B	PREDICTED: nuclear speckle splicing regulatory protein 1-like isoform X3 [Arachis ipaensis]
MSTRG.13374	brown	FHY3	PREDICTED: protein FAR1-RELATED SEQUENCE 5-like [Arachis ipaensis]
MSTRG.13478	brown	SOQ1	PREDICTED: NHL repeat-containing protein 2 [Arachis ipaensis]
MSTRG.14015	brown	--	-
MSTRG.14019	brown	--	PREDICTED: uncharacterized protein LOC107493714 [Arachis duranensis]
MSTRG.14057	brown	--	PREDICTED: glycine-rich cell wall structural protein 1.8-like [Arachis ipaensis]
MSTRG.14063	brown	NPF4.4	PREDICTED: protein NRT1/ PTR FAMILY 4.5-like [Arachis ipaensis]
MSTRG.14090	brown	--	-
MSTRG.14322	brown	PCMP-E54	PREDICTED: pentatricopeptide repeat-containing protein At1g26900, mitochondrial-like [Arachis duranensis]
MSTRG.14337	brown	At2g19490	PREDICTED: 3-ketoacyl-CoA synthase 4-like [Arachis ipaensis]
MSTRG.14394	brown	--	PREDICTED: uncharacterized protein LOC107475361 [Arachis duranensis]
MSTRG.14496	brown	OsI_006296	PREDICTED: serine/threonine protein phosphatase 2A 55 kDa regulatory subunit B alpha isoform-like [Gossypium raimondii]
MSTRG.14498	brown	--	PREDICTED: myosin-4-like isoform X2 [Arachis ipaensis]
MSTRG.145	brown	--	-
MSTRG.14541	brown	--	PREDICTED: uncharacterized protein LOC107458173 [Arachis duranensis]
MSTRG.14717	brown	--	PREDICTED: disheveled-associated activator of morphogenesis 1-like [Arachis duranensis]
MSTRG.14790	brown	--	PREDICTED: uncharacterized protein LOC107615104 [Arachis ipaensis]
MSTRG.14835	brown	--	PREDICTED: uncharacterized protein LOC107495904 [Arachis duranensis]
MSTRG.14843	brown	ABCE2	PREDICTED: ABC transporter E family member 2 [Arachis duranensis]
MSTRG.14847	brown	--	Histone-lysine N-methyltransferase trr [Glycine soja]
MSTRG.14864	brown	--	PREDICTED: low affinity sulfate transporter 3-like [Arachis duranensis]
MSTRG.14926	brown	--	PREDICTED: uncharacterized protein LOC107615104 [Arachis ipaensis]
MSTRG.15256	brown	--	-
MSTRG.15377	brown	--	PREDICTED: uncharacterized protein LOC107496584 isoform X2 [Arachis duranensis]
MSTRG.15417	brown	Os05g0239150	PREDICTED: zinc finger BED domain-containing protein RICESLEEPER 1-like [Arachis duranensis]
MSTRG.15582	brown	--	-
MSTRG.15796	brown	FHY3	PREDICTED: protein FAR1-RELATED SEQUENCE 5-like [Arachis duranensis]
MSTRG.15904	brown	--	PREDICTED: uncharacterized protein LOC107614766 [Arachis ipaensis]
MSTRG.15948	brown	--	-
MSTRG.15962	brown	--	-
MSTRG.15992	brown	--	-
MSTRG.16006	brown	--	PREDICTED: uncharacterized protein LOC107458173 [Arachis duranensis]
MSTRG.16118	brown	--	PREDICTED: uncharacterized protein LOC107458173 [Arachis duranensis]
MSTRG.16143	brown	--	maternal effect embryo arrest 18 protein [Medicago truncatula]
MSTRG.16164	brown	ORP1A	PREDICTED: oxysterol-binding protein-related protein 1C isoform X2 [Arachis ipaensis]
MSTRG.16186	brown	FRS4	PREDICTED: protein FAR1-RELATED SEQUENCE 5-like [Arachis duranensis]
MSTRG.16212	brown	Os03g0733400	PREDICTED: zinc finger BED domain-containing protein RICESLEEPER 2-like [Arachis ipaensis]
MSTRG.16257	brown	PCMP-E58	PREDICTED: pentatricopeptide repeat-containing protein At1g43980, mitochondrial [Arachis duranensis]
MSTRG.16270	brown	--	PREDICTED: uncharacterized protein LOC107458965 [Arachis duranensis]
MSTRG.16429	brown	--	PREDICTED: uncharacterized protein LOC107459180 isoform X1 [Arachis duranensis]
MSTRG.16500	brown	--	PREDICTED: vesicle-fusing ATPase-like isoform X1 [Arachis duranensis]
MSTRG.16503	brown	--	PREDICTED: uncharacterized protein LOC107469686 [Arachis duranensis]
MSTRG.16512	brown	--	PREDICTED: uncharacterized protein LOC107485094 [Arachis duranensis]
MSTRG.16532	brown	--	PREDICTED: uncharacterized protein LOC107465140 [Arachis duranensis]
MSTRG.16533	brown	--	PREDICTED: uncharacterized protein LOC107469686 [Arachis duranensis]
MSTRG.16551	brown	--	PREDICTED: uncharacterized protein LOC107619196 isoform X2 [Arachis ipaensis]
MSTRG.16560	brown	--	PREDICTED: GATA zinc finger domain-containing protein 14 [Cicer arietinum]
MSTRG.16633	brown	--	PREDICTED: protein FAR1-RELATED SEQUENCE 5-like [Arachis ipaensis]
MSTRG.16644	brown	--	PREDICTED: uncharacterized protein LOC107458173 [Arachis duranensis]
MSTRG.17309	brown	--	PREDICTED: uncharacterized protein LOC107615542 [Arachis ipaensis]
MSTRG.17310	brown	--	PREDICTED: uncharacterized protein LOC107615542 [Arachis ipaensis]
MSTRG.17388	brown	--	PREDICTED: uncharacterized protein LOC107485528 [Arachis duranensis]
MSTRG.17526	brown	NMAT4	Intron maturase isoform 1 [Theobroma cacao]
MSTRG.17688	brown	--	PREDICTED: pectin acetylesterase 8-like [Arachis duranensis]
MSTRG.17800	brown	--	-
MSTRG.17821	brown	rpmG	PREDICTED: 50S ribosomal protein L33-like isoform X1 [Glycine max]
MSTRG.17914	brown	PVA21	PREDICTED: vesicle-associated protein 2-1 isoform X2 [Arachis duranensis]
MSTRG.18012	brown	--	PREDICTED: uncharacterized protein LOC107614766 [Arachis ipaensis]
MSTRG.18080	brown	--	-
MSTRG.18277	brown	--	PREDICTED: uncharacterized protein LOC107464590 [Arachis duranensis]
MSTRG.18301	brown	--	Retrovirus-related Pol polyprotein from transposon TNT 1-94 [Cajanus cajan]
MSTRG.18323	brown	--	PREDICTED: protein FAR1-RELATED SEQUENCE 5-like [Arachis ipaensis]
MSTRG.1833	brown	--	PREDICTED: potassium transporter 19-like [Arachis ipaensis]
MSTRG.18335	brown	--	wound-responsive family protein [Medicago truncatula]
MSTRG.18402	brown	--	PREDICTED: uncharacterized protein LOC107462630 isoform X1 [Arachis duranensis]
MSTRG.18479	brown	At3g25210	PREDICTED: pentatricopeptide repeat-containing protein At3g25210, mitochondrial-like [Arachis duranensis]
MSTRG.1848	brown	--	PREDICTED: uncharacterized protein LOC107615542 [Arachis ipaensis]
MSTRG.18584	brown	EMB1025	PREDICTED: pentatricopeptide repeat-containing protein At4g20090 [Arachis ipaensis]
MSTRG.18647	brown	--	PREDICTED: uncharacterized protein LOC107464595 [Arachis duranensis]
MSTRG.18703	brown	MOCS2	PREDICTED: molybdopterin synthase catalytic subunit-like [Arachis ipaensis]
MSTRG.18711	brown	RPL28	PREDICTED: 50S ribosomal protein L28, chloroplastic-like [Arachis duranensis]
MSTRG.18875	brown	--	P-loop nucleoside triphosphate hydrolase superfamily protein [Medicago truncatula]
MSTRG.18883	brown	--	PREDICTED: autism susceptibility gene 2 protein-like [Arachis ipaensis]
MSTRG.189	brown	VHA-e1	PREDICTED: V-type proton ATPase subunit e1-like isoform X2 [Arachis ipaensis]
MSTRG.18943	brown	--	PREDICTED: rhophilin-2-like isoform X1 [Arachis ipaensis]
MSTRG.19073	brown	--	PREDICTED: uncharacterized protein LOC107627065 [Arachis ipaensis]
MSTRG.19171	brown	--	PREDICTED: uncharacterized protein LOC107641309 [Arachis ipaensis]
MSTRG.19252	brown	--	-
MSTRG.19444	brown	At5g53140	PREDICTED: probable protein phosphatase 2C 76 [Arachis duranensis]
MSTRG.19490	brown	--	-
MSTRG.19567	brown	--	PREDICTED: uncharacterized protein LOC107645026 [Arachis ipaensis]
MSTRG.19712	brown	--	PREDICTED: uncharacterized protein LOC107472460, partial [Arachis duranensis]
MSTRG.19779	brown	--	-
MSTRG.19792	brown	--	PREDICTED: uncharacterized mitochondrial protein AtMg00310-like [Arachis ipaensis]
MSTRG.19796	brown	--	DUF1677 family protein [Medicago truncatula]
MSTRG.19825	brown	LACS5	long chain acyl-CoA synthetase 4 [Arachis hypogaea]
MSTRG.19853	brown	At3g62400	PREDICTED: cytochrome c oxidase subunit 5C-2 [Arachis duranensis]
MSTRG.19886	brown	--	PREDICTED: vacuolar protein sorting-associated protein 8 homolog [Arachis ipaensis]
MSTRG.19959	brown	--	PREDICTED: uncharacterized protein LOC107465140 [Arachis duranensis]
MSTRG.20008	brown	--	PREDICTED: truncated transcription factor CAULIFLOWER D-like [Arachis duranensis]
MSTRG.20035	brown	--	PREDICTED: uncharacterized protein LOC107614018 [Arachis ipaensis]
MSTRG.20139	brown	--	PREDICTED: uncharacterized protein LOC107495138 isoform X1 [Arachis duranensis]
MSTRG.20174	brown	--	PREDICTED: uncharacterized protein LOC107623717 [Arachis ipaensis]
MSTRG.20180	brown	--	-
MSTRG.20192	brown	--	PREDICTED: ESX-1 secretion-associated protein EspI-like [Arachis ipaensis]
MSTRG.20265	brown	--	PREDICTED: uncharacterized protein LOC107469462 [Arachis duranensis]
MSTRG.20273	brown	--	-
MSTRG.20279	brown	--	PREDICTED: uncharacterized protein LOC107611183 [Arachis ipaensis]
MSTRG.20280	brown	--	-
MSTRG.20310	brown	--	PREDICTED: uncharacterized protein LOC107465718 [Arachis duranensis]
MSTRG.20312	brown	--	PREDICTED: uncharacterized protein LOC107465718 [Arachis duranensis]
MSTRG.20407	brown	--	PREDICTED: uncharacterized protein LOC107612205 isoform X1 [Arachis ipaensis]
MSTRG.20425	brown	--	PREDICTED: uncharacterized protein LOC107488562 [Arachis duranensis]
MSTRG.20443	brown	--	PREDICTED: proline-rich receptor-like protein kinase PERK2 [Arachis ipaensis]
MSTRG.20483	brown	--	PREDICTED: TMV resistance protein N-like [Arachis ipaensis]
MSTRG.20556	brown	MAA3	PREDICTED: uncharacterized protein LOC107462550 isoform X1 [Arachis duranensis]
MSTRG.20667	brown	--	CAAX amino terminal protease family protein [Medicago truncatula]
MSTRG.20802	brown	HSP70-8	PREDICTED: heat shock 70 kDa protein 8-like [Arachis duranensis]
MSTRG.20851	brown	--	myb-like protein X [Cajanus cajan]
MSTRG.20948	brown	--	PREDICTED: sarcoplasmic reticulum histidine-rich calcium-binding protein [Arachis ipaensis]
MSTRG.20964	brown	--	-
MSTRG.2116	brown	P67	PREDICTED: pentatricopeptide repeat-containing protein At4g16390, chloroplastic [Arachis duranensis]
MSTRG.2123	brown	--	PREDICTED: uncharacterized protein LOC107610182 [Arachis ipaensis]
MSTRG.21341	brown	--	-
MSTRG.21477	brown	--	PREDICTED: LOW QUALITY PROTEIN: RNA-binding protein 2-like [Arachis duranensis]
MSTRG.21478	brown	--	PREDICTED: uncharacterized protein LOC107638065 isoform X2 [Arachis ipaensis]
MSTRG.22008	brown	--	PREDICTED: uncharacterized protein LOC107616680 [Arachis ipaensis]
MSTRG.22022	brown	--	PREDICTED: uncharacterized protein LOC107468858 [Arachis duranensis]
MSTRG.22024	brown	--	PREDICTED: vacuolar protein sorting-associated protein 4-like isoform X2 [Arachis duranensis]
MSTRG.22134	brown	--	PREDICTED: uncharacterized protein LOC107615542 [Arachis ipaensis]
MSTRG.22185	brown	PPC2	PREDICTED: phosphoenolpyruvate carboxylase, housekeeping isozyme-like [Arachis ipaensis]
MSTRG.22193	brown	Os01g0518400	PREDICTED: zinc finger BED domain-containing protein RICESLEEPER 1-like [Arachis duranensis]
MSTRG.22197	brown	CPL4	PREDICTED: RNA polymerase II C-terminal domain phosphatase-like 4 [Arachis ipaensis]
MSTRG.22285	brown	At3g25210	PREDICTED: LOW QUALITY PROTEIN: pentatricopeptide repeat-containing protein At3g25210, mitochondrial-like [Arachis duranensis]
MSTRG.22317	brown	--	PREDICTED: uncharacterized protein LOC107469462 [Arachis duranensis]
MSTRG.22326	brown	--	PREDICTED: uncharacterized protein LOC107626020 [Arachis ipaensis]
MSTRG.22348	brown	--	PREDICTED: uncharacterized protein LOC107466663 [Arachis duranensis]
MSTRG.22359	brown	--	PREDICTED: uncharacterized protein LOC107616951 [Arachis ipaensis]
MSTRG.22380	brown	--	PREDICTED: uncharacterized protein LOC107612205 isoform X1 [Arachis ipaensis]
MSTRG.22405	brown	--	PREDICTED: uncharacterized protein LOC107466367 [Arachis duranensis]
MSTRG.22468	brown	--	-
MSTRG.22470	brown	--	PREDICTED: uncharacterized protein LOC107642005 [Arachis ipaensis]
MSTRG.22506	brown	--	PREDICTED: uncharacterized protein LOC107470380 [Arachis duranensis]
MSTRG.22517	brown	--	PREDICTED: involucrin-like [Arachis duranensis]
MSTRG.22558	brown	--	PREDICTED: glucan endo-1,3-beta-glucosidase 8-like [Arachis duranensis]
MSTRG.22585	brown	--	PREDICTED: uncharacterized protein LOC107495326 [Arachis duranensis]
MSTRG.22640	brown	--	PREDICTED: uncharacterized protein LOC107611752 [Arachis ipaensis]
MSTRG.22648	brown	--	Kazal-type serine protease inhibitor [Medicago truncatula]
MSTRG.22694	brown	ABCC3	PREDICTED: ABC transporter C family member 3-like [Arachis ipaensis]
MSTRG.22753	brown	CID7	PREDICTED: LOW QUALITY PROTEIN: polyadenylate-binding protein-interacting protein 7-like [Arachis ipaensis]
MSTRG.22783	brown	--	PREDICTED: uncharacterized protein LOC107470483 [Arachis duranensis]
MSTRG.22856	brown	--	-
MSTRG.22945	brown	--	PREDICTED: uncharacterized protein LOC107614899 [Arachis ipaensis]
MSTRG.22946	brown	--	PREDICTED: uncharacterized protein LOC107614899 [Arachis ipaensis]
MSTRG.23017	brown	--	PREDICTED: serine/threonine-protein phosphatase 7 long form homolog [Arachis ipaensis]
MSTRG.23046	brown	--	PREDICTED: probable cadmium/zinc-transporting ATPase HMA1, chloroplastic isoform X2 [Arachis ipaensis]
MSTRG.23048	brown	--	PREDICTED: replication protein A 70 kDa DNA-binding subunit-like [Arachis ipaensis]
MSTRG.23068	brown	--	PREDICTED: conserved oligomeric Golgi complex subunit 1 [Arachis duranensis]
MSTRG.23091	brown	--	PREDICTED: protein TSS-like isoform X1 [Arachis duranensis]
MSTRG.23163	brown	--	PREDICTED: uncharacterized protein LOC107468858 [Arachis duranensis]
MSTRG.23589	brown	--	-
MSTRG.23617	brown	--	PREDICTED: B3 domain-containing transcription factor VRN1-like isoform X2 [Arachis ipaensis]
MSTRG.23628	brown	U2AF35A	PREDICTED: splicing factor U2af small subunit B-like [Arachis duranensis]
MSTRG.24177	brown	--	PREDICTED: uncharacterized protein LOC107469686 [Arachis duranensis]
MSTRG.24180	brown	VHA-e1	PREDICTED: V-type proton ATPase subunit e1-like isoform X2 [Arachis ipaensis]
MSTRG.24412	brown	LYSA1	PREDICTED: diaminopimelate decarboxylase 1, chloroplastic-like [Arachis duranensis]
MSTRG.24435	brown	AUR3	PREDICTED: serine/threonine-protein kinase Aurora-3 [Arachis ipaensis]
MSTRG.24463	brown	--	PREDICTED: uncharacterized protein LOC107637693 [Arachis ipaensis]
MSTRG.24499	brown	--	-
MSTRG.24533	brown	--	-
MSTRG.24546	brown	--	PREDICTED: uncharacterized protein LOC107482995 [Arachis duranensis]
MSTRG.24591	brown	VDAC1	PREDICTED: uncharacterized protein LOC107628952 isoform X2 [Arachis ipaensis]
MSTRG.24604	brown	AIP3	PREDICTED: probable prefoldin subunit 4 [Arachis duranensis]
MSTRG.24708	brown	--	-
MSTRG.24709	brown	--	PREDICTED: GRIP and coiled-coil domain-containing protein 2 isoform X4 [Arachis duranensis]
MSTRG.24738	brown	--	-
MSTRG.24755	brown	At1g74360	PREDICTED: serine/threonine-protein kinase-like protein CCR4 [Arachis duranensis]
MSTRG.24826	brown	--	PREDICTED: uncharacterized protein LOC107474587 isoform X2 [Arachis duranensis]
MSTRG.24881	brown	--	PREDICTED: uncharacterized protein LOC107479552 [Arachis duranensis]
MSTRG.24896	brown	--	PREDICTED: uncharacterized protein LOC107608051 [Arachis ipaensis]
MSTRG.24906	brown	--	PREDICTED: mediator of RNA polymerase II transcription subunit 16-like isoform X1 [Arachis ipaensis]
MSTRG.2496	brown	--	PREDICTED: uncharacterized protein LOC107494765 [Arachis duranensis]
MSTRG.25117	brown	--	-
MSTRG.25176	brown	--	PREDICTED: uncharacterized protein LOC107606456 [Arachis ipaensis]
MSTRG.25237	brown	--	PREDICTED: uncharacterized protein LOC107635522 isoform X1 [Arachis ipaensis]
MSTRG.25314	brown	--	PREDICTED: uncharacterized protein LOC107641309 [Arachis ipaensis]
MSTRG.25320	brown	--	-
MSTRG.2534	brown	--	-
MSTRG.25411	brown	--	PREDICTED: NAD-dependent malic enzyme 2, mitochondrial-like [Arachis duranensis]
MSTRG.25581	brown	--	PREDICTED: growth/differentiation factor 7 [Arachis ipaensis]
MSTRG.25757	brown	HAT	PREDICTED: zinc finger BED domain-containing protein DAYSLEEPER [Arachis ipaensis]
MSTRG.25797	brown	--	plant/F18G18-20 protein [Medicago truncatula]
MSTRG.26189	brown	--	PREDICTED: uncharacterized protein LOC107626556 [Arachis ipaensis]
MSTRG.26290	brown	--	PREDICTED: zinc finger CCCH domain-containing protein 13-like [Arachis duranensis]
MSTRG.26356	brown	--	PREDICTED: uncharacterized protein LOC107614766 [Arachis ipaensis]
MSTRG.26630	brown	--	-
MSTRG.26680	brown	--	PREDICTED: uncharacterized protein LOC107641309 [Arachis ipaensis]
MSTRG.26737	brown	--	PREDICTED: protein CHUP1, chloroplastic-like [Pyrus x bretschneideri]
MSTRG.26768	brown	--	PREDICTED: uncharacterized protein LOC107612205 isoform X1 [Arachis ipaensis]
MSTRG.26769	brown	--	PREDICTED: zinc finger MYM-type protein 1-like [Arachis ipaensis]
MSTRG.26819	brown	--	PREDICTED: uncharacterized protein LOC107473436 isoform X2 [Arachis duranensis]
MSTRG.26820	brown	--	PREDICTED: uncharacterized protein LOC107473436 isoform X1 [Arachis duranensis]
MSTRG.26848	brown	HPGT2	PREDICTED: probable beta-1,3-galactosyltransferase 10 [Arachis ipaensis]
MSTRG.26880	brown	ADNT1	PREDICTED: mitochondrial adenine nucleotide transporter ADNT1-like [Arachis duranensis]
MSTRG.27093	brown	--	PREDICTED: uncharacterized protein LOC107625253 isoform X2 [Arachis ipaensis]
MSTRG.27102	brown	--	PREDICTED: uncharacterized protein LOC107611183 [Arachis ipaensis]
MSTRG.27131	brown	--	-
MSTRG.27205	brown	--	PREDICTED: uncharacterized protein LOC107608286 [Arachis ipaensis]
MSTRG.27222	brown	--	PREDICTED: sterol 3-beta-glucosyltransferase UGT80B1 [Arachis ipaensis]
MSTRG.27251	brown	CRK	PREDICTED: protein BREAST CANCER SUSCEPTIBILITY 1 homolog [Arachis duranensis]
MSTRG.2726	brown	--	PREDICTED: uncharacterized protein LOC107627689 [Arachis ipaensis]
MSTRG.27381	brown	--	PREDICTED: putative disease resistance protein At3g14460 [Arachis ipaensis]
MSTRG.27418	brown	--	PREDICTED: uncharacterized protein LOC107494095 [Arachis duranensis]
MSTRG.27419	brown	--	PREDICTED: respiratory burst oxidase homolog protein B-like [Arachis ipaensis]
MSTRG.27533	brown	INT1	PREDICTED: inositol transporter 1-like [Arachis duranensis]
MSTRG.27665	brown	HPGT2	PREDICTED: probable beta-1,3-galactosyltransferase 10 [Arachis ipaensis]
MSTRG.27737	brown	FH5	PREDICTED: formin-like protein 5 [Arachis ipaensis]
MSTRG.27758	brown	CIPK2	PREDICTED: CBL-interacting protein kinase 2-like [Arachis ipaensis]
MSTRG.27763	brown	--	PREDICTED: uncharacterized protein LOC107625862 [Arachis ipaensis]
MSTRG.27859	brown	CPX	PREDICTED: oxygen-dependent coproporphyrinogen-III oxidase, chloroplastic-like [Arachis ipaensis]
MSTRG.27863	brown	RGA2	PREDICTED: disease resistance protein RGA2-like [Populus euphratica]
MSTRG.27926	brown	--	PREDICTED: uncharacterized protein LOC107472363 [Arachis duranensis]
MSTRG.27929	brown	--	PREDICTED: uncharacterized protein LOC107606656 [Arachis ipaensis]
MSTRG.28004	brown	--	PREDICTED: uncharacterized protein LOC107628535 [Arachis ipaensis]
MSTRG.28239	brown	--	PREDICTED: putative disease resistance RPP13-like protein 1 [Arachis ipaensis]
MSTRG.28268	brown	--	PREDICTED: uncharacterized protein LOC107465281 [Arachis duranensis]
MSTRG.28431	brown	RPL28	PREDICTED: 50S ribosomal protein L28, chloroplastic-like [Arachis duranensis]
MSTRG.29105	brown	--	PREDICTED: cytochrome P450 71A1-like [Arachis duranensis]
MSTRG.29111	brown	--	hypothetical protein 303L13_15 [Arachis hypogaea]
MSTRG.29246	brown	--	PREDICTED: uncharacterized protein LOC107496870 [Arachis duranensis]
MSTRG.29363	brown	--	PREDICTED: uncharacterized protein LOC107611035 [Arachis ipaensis]
MSTRG.29412	brown	PHT1-7	PREDICTED: probable inorganic phosphate transporter 1-7 [Arachis ipaensis]
MSTRG.29425	brown	--	-
MSTRG.2952	brown	--	PREDICTED: uncharacterized protein LOC107475361 [Arachis duranensis]
MSTRG.30006	brown	--	PREDICTED: uncharacterized protein LOC107607406 [Arachis ipaensis]
MSTRG.30057	brown	--	PREDICTED: protein NRT1/ PTR FAMILY 4.6-like [Arachis ipaensis]
MSTRG.30149	brown	FAB1A	PREDICTED: protein EMBRYO SAC DEVELOPMENT ARREST 3, chloroplastic [Arachis ipaensis]
MSTRG.30284	brown	--	-
MSTRG.30293	brown	--	-
MSTRG.30316	brown	--	PREDICTED: uncharacterized protein LOC107465992 [Arachis duranensis]
MSTRG.30330	brown	--	PREDICTED: eugenol O-methyltransferase-like [Arachis ipaensis]
MSTRG.30360	brown	--	PREDICTED: uncharacterized protein LOC107633226 [Arachis ipaensis]
MSTRG.30405	brown	--	PREDICTED: protein argonaute 12-like [Arachis ipaensis]
MSTRG.30421	brown	LCMT1	PREDICTED: probable quinone oxidoreductase [Erythranthe guttata]
MSTRG.30470	brown	ABCG11	PREDICTED: WEB family protein At3g02930, chloroplastic [Arachis ipaensis]
MSTRG.3048	brown	BHLH3	PREDICTED: transcription factor bHLH3 [Arachis duranensis]
MSTRG.30499	brown	--	PREDICTED: uncharacterized protein LOC107641940 [Arachis ipaensis]
MSTRG.3051	brown	MAA3	PREDICTED: probable helicase MAGATAMA 3 isoform X2 [Arachis ipaensis]
MSTRG.30561	brown	CYP86A22	PREDICTED: cytochrome P450 86A22 [Arachis ipaensis]
MSTRG.3061	brown	--	PREDICTED: pentatricopeptide repeat-containing protein At1g12775, mitochondrial-like isoform X1 [Arachis ipaensis]
MSTRG.30614	brown	--	PREDICTED: uncharacterized protein LOC107489344 isoform X3 [Arachis duranensis]
MSTRG.30644	brown	--	PREDICTED: regulator of nonsense transcripts UPF3-like isoform X1 [Arachis ipaensis]
MSTRG.3086	brown	--	PREDICTED: uncharacterized protein LOC107627550 [Arachis ipaensis]
MSTRG.30928	brown	RMA1H1	PREDICTED: E3 ubiquitin-protein ligase RMA1H1-like [Arachis duranensis]
MSTRG.3096	brown	--	-
MSTRG.31037	brown	AHL15	PREDICTED: AT-hook motif nuclear-localized protein 15-like [Arachis ipaensis]
MSTRG.31068	brown	--	-
MSTRG.31230	brown	ATL46	PREDICTED: RING-H2 finger protein ATL47-like [Arachis ipaensis]
MSTRG.31877	brown	--	PREDICTED: G-type lectin S-receptor-like serine/threonine-protein kinase At1g11330 [Arachis ipaensis]
MSTRG.31900	brown	FRS5	PREDICTED: protein FAR1-RELATED SEQUENCE 5 [Arachis ipaensis]
MSTRG.32045	brown	--	PREDICTED: pentatricopeptide repeat-containing protein At1g62670, mitochondrial-like [Arachis duranensis]
MSTRG.3205	brown	--	-
MSTRG.32190	brown	--	PREDICTED: uncharacterized protein LOC107475361 [Arachis duranensis]
MSTRG.32394	brown	--	PREDICTED: DExH-box ATP-dependent RNA helicase DExH17-like [Arachis ipaensis]
MSTRG.32458	brown	--	PREDICTED: ATP-dependent RNA helicase A [Arachis duranensis]
MSTRG.32526	brown	--	Retrovirus-related Pol polyprotein LINE-1 [Cajanus cajan]
MSTRG.3254	brown	--	PREDICTED: uncharacterized protein LOC107485444 [Arachis duranensis]
MSTRG.32608	brown	--	-
MSTRG.32671	brown	--	PREDICTED: uncharacterized protein LOC107469686 [Arachis duranensis]
MSTRG.32682	brown	--	PREDICTED: uncharacterized protein LOC107479552 [Arachis duranensis]
MSTRG.32721	brown	--	PREDICTED: uncharacterized protein LOC107641309 [Arachis ipaensis]
MSTRG.32830	brown	--	PREDICTED: uncharacterized protein LOC107458965 [Arachis duranensis]
MSTRG.32907	brown	--	PREDICTED: uncharacterized protein LOC107608286 [Arachis ipaensis]
MSTRG.32913	brown	--	PREDICTED: uncharacterized protein LOC107458173 [Arachis duranensis]
MSTRG.32939	brown	--	PREDICTED: uncharacterized protein LOC107637693 [Arachis ipaensis]
MSTRG.3296	brown	--	PREDICTED: uncharacterized protein At3g06530 [Arachis ipaensis]
MSTRG.33014	brown	--	PREDICTED: replication protein A 70 kDa DNA-binding subunit C-like isoform X1 [Arachis duranensis]
MSTRG.33023	brown	--	PREDICTED: uncharacterized protein LOC107484384 [Arachis duranensis]
MSTRG.33042	brown	--	-
MSTRG.33049	brown	--	-
MSTRG.33055	brown	--	PREDICTED: uncharacterized protein LOC107611183 [Arachis ipaensis]
MSTRG.33072	brown	--	-
MSTRG.33359	brown	--	PREDICTED: uncharacterized protein LOC107636860 [Arachis ipaensis]
MSTRG.33360	brown	--	PREDICTED: uncharacterized protein LOC107636860 [Arachis ipaensis]
MSTRG.33361	brown	--	-
MSTRG.33377	brown	At5g61370	PREDICTED: pentatricopeptide repeat-containing protein At5g61370, mitochondrial-like [Arachis ipaensis]
MSTRG.33392	brown	--	PREDICTED: uncharacterized protein LOC107615542 [Arachis ipaensis]
MSTRG.33401	brown	VHA-c''2	V-type proton ATPase subunit c''1, partial [Noccaea caerulescens]
MSTRG.33422	brown	--	PREDICTED: uncharacterized protein LOC107635034 [Arachis ipaensis]
MSTRG.33549	brown	--	PREDICTED: uric acid degradation bifunctional protein TTL-like [Arachis ipaensis]
MSTRG.33609	brown	--	PREDICTED: uncharacterized protein LOC107636340 [Arachis ipaensis]
MSTRG.33654	brown	--	PREDICTED: uncharacterized protein LOC107458173 [Arachis duranensis]
MSTRG.33662	brown	--	PREDICTED: uncharacterized protein LOC107635034 [Arachis ipaensis]
MSTRG.33687	brown	--	PREDICTED: aspartic proteinase nepenthesin-1-like [Arachis ipaensis]
MSTRG.3370	brown	--	-
MSTRG.33767	brown	--	-
MSTRG.3377	brown	--	PREDICTED: uncharacterized protein LOC107474270 [Arachis duranensis]
MSTRG.33791	brown	--	PREDICTED: uncharacterized protein LOC107632895 [Arachis ipaensis]
MSTRG.33801	brown	--	-
MSTRG.33912	brown	ABCG11	PREDICTED: WEB family protein At3g02930, chloroplastic [Arachis ipaensis]
MSTRG.34015	brown	HEME1	PREDICTED: uroporphyrinogen decarboxylase 1, chloroplastic-like [Arachis ipaensis]
MSTRG.3403	brown	--	PREDICTED: uncharacterized protein LOC107474214 [Arachis duranensis]
MSTRG.34042	brown	--	PREDICTED: uncharacterized protein LOC107464586 [Arachis duranensis]
MSTRG.34099	brown	EPSPS-1	PREDICTED: 3-phosphoshikimate 1-carboxyvinyltransferase 2-like [Arachis ipaensis]
MSTRG.34114	brown	--	-
MSTRG.34156	brown	--	PREDICTED: putative disease resistance RPP13-like protein 1 [Arachis ipaensis]
MSTRG.3442	brown	--	-
MSTRG.34452	brown	FHY3	PREDICTED: protein FAR1-RELATED SEQUENCE 5-like [Arachis ipaensis]
MSTRG.34570	brown	CHX15	PREDICTED: cation/H(+) antiporter 15-like [Arachis ipaensis]
MSTRG.3460	brown	--	-
MSTRG.34768	brown	--	-
MSTRG.3478	brown	--	-
MSTRG.34814	brown	--	-
MSTRG.34897	brown	--	PREDICTED: uncharacterized protein LOC107641675 isoform X1 [Arachis ipaensis]
MSTRG.3496	brown	--	PREDICTED: uncharacterized protein LOC107485444 [Arachis duranensis]
MSTRG.34981	brown	--	Retrovirus-related Pol polyprotein from transposon TNT 1-94 [Cajanus cajan]
MSTRG.35007	brown	--	PREDICTED: uncharacterized protein LOC107635034 [Arachis ipaensis]
MSTRG.35009	brown	--	-
MSTRG.35088	brown	--	-
MSTRG.35223	brown	RE1	PREDICTED: uncharacterized mitochondrial protein AtMg00810-like [Arachis duranensis]
MSTRG.3533	brown	--	PREDICTED: cyclic pyranopterin monophosphate synthase, mitochondrial-like [Arachis ipaensis]
MSTRG.35421	brown	At1g63850	PREDICTED: BTB/POZ domain-containing protein At1g63850 [Arachis duranensis]
MSTRG.35422	brown	--	PREDICTED: uncharacterized protein LOC107621105 [Arachis ipaensis]
MSTRG.3543	brown	--	PREDICTED: uncharacterized protein LOC107477550 [Arachis duranensis]
MSTRG.35521	brown	--	PREDICTED: uncharacterized protein LOC107608286 [Arachis ipaensis]
MSTRG.35572	brown	--	PREDICTED: cyclic pyranopterin monophosphate synthase, mitochondrial-like [Arachis ipaensis]
MSTRG.35609	brown	EBP2	PREDICTED: probable rRNA-processing protein EBP2 homolog [Arachis ipaensis]
MSTRG.35611	brown	--	PREDICTED: glucan endo-1,3-beta-glucosidase 4-like [Arachis duranensis]
MSTRG.35613	brown	--	PREDICTED: uncharacterized protein LOC107485094 [Arachis duranensis]
MSTRG.35614	brown	NET1B	PREDICTED: protein NETWORKED 1A [Arachis ipaensis]
MSTRG.35633	brown	--	PREDICTED: uncharacterized protein LOC107457914 [Arachis duranensis]
MSTRG.35673	brown	--	PREDICTED: uncharacterized protein LOC107484528 [Arachis duranensis]
MSTRG.35708	brown	--	PREDICTED: rac-like GTP-binding protein 7, partial [Arachis duranensis]
MSTRG.35709	brown	GCN2	PREDICTED: eIF-2-alpha kinase GCN2-like, partial [Arachis ipaensis]
MSTRG.35733	brown	--	PREDICTED: uric acid degradation bifunctional protein TTL-like [Arachis ipaensis]
MSTRG.3575	brown	--	disease resistance protein [Medicago truncatula]
MSTRG.35757	brown	--	-
MSTRG.35784	brown	--	PREDICTED: uncharacterized protein LOC107643754 [Arachis ipaensis]
MSTRG.35790	brown	--	PREDICTED: uncharacterized protein LOC107633204 [Arachis ipaensis]
MSTRG.35800	brown	--	PREDICTED: uncharacterized protein LOC107636516 [Arachis ipaensis]
MSTRG.35803	brown	--	-
MSTRG.35820	brown	--	PREDICTED: uncharacterized protein LOC107643661 [Arachis ipaensis]
MSTRG.35909	brown	--	-
MSTRG.35934	brown	PRO1	profilin [Arachis hypogaea]
MSTRG.35953	brown	--	-
MSTRG.35978	brown	--	PREDICTED: F-box/kelch-repeat protein SKIP6-like, partial [Arachis ipaensis]
MSTRG.36044	brown	--	PREDICTED: uncharacterized protein LOC107641309 [Arachis ipaensis]
MSTRG.36066	brown	--	PREDICTED: uncharacterized protein LOC107458173 [Arachis duranensis]
MSTRG.36104	brown	AtMg01250	reverse transcriptase [Corchorus capsularis]
MSTRG.36181	brown	--	PREDICTED: F-box/kelch-repeat protein At3g23880-like [Arachis ipaensis]
MSTRG.36197	brown	--	PREDICTED: uncharacterized protein LOC107635034 [Arachis ipaensis]
MSTRG.36242	brown	--	-
MSTRG.36250	brown	--	PREDICTED: uncharacterized protein LOC107640619 [Arachis ipaensis]
MSTRG.36286	brown	--	hypothetical protein ARAX_ADH035P21-018 [Arachis duranensis]
MSTRG.36458	brown	--	PREDICTED: uncharacterized protein LOC107645026 [Arachis ipaensis]
MSTRG.3649	brown	--	PREDICTED: uncharacterized protein LOC107458173 [Arachis duranensis]
MSTRG.3662	brown	--	-
MSTRG.36630	brown	--	PREDICTED: uric acid degradation bifunctional protein TTL-like [Arachis ipaensis]
MSTRG.36726	brown	--	PREDICTED: uncharacterized protein LOC107486653 [Arachis duranensis]
MSTRG.36810	brown	--	PREDICTED: uncharacterized protein LOC107484855 isoform X1 [Arachis duranensis]
MSTRG.369	brown	--	PREDICTED: uncharacterized protein LOC107485854 [Arachis duranensis]
MSTRG.3703	brown	Os05g0571100	PREDICTED: protein ROOT PRIMORDIUM DEFECTIVE 1-like [Arachis duranensis]
MSTRG.3715	brown	--	PREDICTED: uncharacterized protein LOC107489259 isoform X1 [Arachis duranensis]
MSTRG.37364	brown	MORF1	PREDICTED: multiple organellar RNA editing factor 1, mitochondrial-like isoform X1 [Arachis ipaensis]
MSTRG.37418	brown	ISA2	PREDICTED: isoamylase 2, chloroplastic [Arachis ipaensis]
MSTRG.37648	brown	--	-
MSTRG.37743	brown	SEC15B	PREDICTED: exocyst complex component SEC15B [Arachis ipaensis]
MSTRG.37751	brown	RPS17	PREDICTED: 30S ribosomal protein S17, chloroplastic-like [Arachis ipaensis]
MSTRG.37762	brown	--	PREDICTED: zinc finger BED domain-containing protein RICESLEEPER 3-like [Arachis ipaensis]
MSTRG.379	brown	--	PREDICTED: uncharacterized protein LOC107645026 [Arachis ipaensis]
MSTRG.3792	brown	PCMP-E93	PREDICTED: pentatricopeptide repeat-containing protein At3g18970 [Arachis duranensis]
MSTRG.3796	brown	--	PREDICTED: uncharacterized protein LOC107646472 [Arachis ipaensis]
MSTRG.38017	brown	GID1C	PREDICTED: gibberellin receptor GID1C-like [Arachis ipaensis]
MSTRG.38045	brown	--	PREDICTED: uncharacterized protein LOC107641309 [Arachis ipaensis]
MSTRG.38079	brown	SUS5	PREDICTED: sucrose synthase 5 isoform X1 [Arachis ipaensis]
MSTRG.38139	brown	LACS5	PREDICTED: long chain acyl-CoA synthetase 5 [Arachis duranensis]
MSTRG.38141	brown	--	-
MSTRG.38207	brown	--	PREDICTED: cytochrome P450 71A1-like [Arachis duranensis]
MSTRG.38241	brown	NAA15	ADP-ribosylation factor GTPase-activating protein AGD1 [Zea mays]
MSTRG.38259	brown	--	PREDICTED: uncharacterized protein LOC107621067 [Arachis ipaensis]
MSTRG.38298	brown	--	LINE-1 reverse transcriptase isogeny [Cajanus cajan]
MSTRG.3836	brown	--	PREDICTED: uncharacterized protein LOC107469686 [Arachis duranensis]
MSTRG.38371	brown	ADNT1	PREDICTED: mitochondrial adenine nucleotide transporter ADNT1-like [Arachis duranensis]
MSTRG.38396	brown	--	PREDICTED: vacuolar protein sorting-associated protein 4-like isoform X2 [Arachis duranensis]
MSTRG.38516	brown	--	-
MSTRG.38535	brown	--	PREDICTED: uncharacterized protein LOC107615947 [Arachis ipaensis]
MSTRG.38542	brown	--	PREDICTED: ras-related protein RABA1b-like [Arachis duranensis]
MSTRG.38561	brown	--	PREDICTED: uncharacterized protein LOC107611183 [Arachis ipaensis]
MSTRG.38590	brown	--	PREDICTED: uncharacterized protein LOC107608459 [Arachis ipaensis]
MSTRG.38596	brown	--	PREDICTED: uncharacterized protein LOC107480049 [Arachis duranensis]
MSTRG.38598	brown	--	-
MSTRG.38606	brown	--	-
MSTRG.38607	brown	--	PREDICTED: uncharacterized protein LOC107608459 [Arachis ipaensis]
MSTRG.3864	brown	--	-
MSTRG.38652	brown	--	PREDICTED: programmed cell death protein 2-like [Arachis duranensis]
MSTRG.38963	brown	--	PREDICTED: uric acid degradation bifunctional protein TTL-like isoform X1 [Arachis duranensis]
MSTRG.39082	brown	--	PREDICTED: uncharacterized protein LOC107477040 [Arachis duranensis]
MSTRG.39162	brown	CPK20	PREDICTED: calcium-dependent protein kinase 20-like [Arachis duranensis]
MSTRG.39195	brown	CHX15	PREDICTED: K(+)/H(+) antiporter 1-like [Arachis ipaensis]
MSTRG.39215	brown	FRS8	PREDICTED: protein FAR1-RELATED SEQUENCE 5-like [Arachis ipaensis]
MSTRG.39259	brown	--	-
MSTRG.39315	brown	--	uncharacterized LOC100810654 [Glycine max]
MSTRG.39466	brown	--	-
MSTRG.3969	brown	DYW9	PREDICTED: pentatricopeptide repeat-containing protein At3g12770-like [Arachis duranensis]
MSTRG.40046	brown	--	PREDICTED: uncharacterized protein LOC107611759 [Arachis ipaensis]
MSTRG.40224	brown	--	PREDICTED: nudix hydrolase 14, chloroplastic-like [Arachis duranensis]
MSTRG.40431	brown	--	PREDICTED: LOW QUALITY PROTEIN: inactive protein kinase SELMODRAFT_444075-like, partial [Arachis ipaensis]
MSTRG.40551	brown	--	PREDICTED: uncharacterized protein LOC107608286 [Arachis ipaensis]
MSTRG.4079	brown	--	PREDICTED: uncharacterized protein LOC107641790 [Arachis ipaensis]
MSTRG.40792	brown	EBM	PREDICTED: mannosylglycoprotein endo-beta-mannosidase-like [Arachis ipaensis]
MSTRG.4080	brown	--	PREDICTED: uncharacterized protein LOC107614899 [Arachis ipaensis]
MSTRG.40836	brown	--	PREDICTED: uncharacterized protein LOC107465763 isoform X3 [Arachis duranensis]
MSTRG.40863	brown	--	PREDICTED: uncharacterized protein LOC107615542 [Arachis ipaensis]
MSTRG.40899	brown	IP5P7	PREDICTED: type IV inositol polyphosphate 5-phosphatase 7 [Arachis ipaensis]
MSTRG.40941	brown	--	-
MSTRG.40962	brown	--	-
MSTRG.41052	brown	--	-
MSTRG.41058	brown	--	-
MSTRG.4109	brown	--	PREDICTED: somatic embryogenesis receptor kinase 1-like [Arachis ipaensis]
MSTRG.41105	brown	--	PREDICTED: pentatricopeptide repeat-containing protein At2g27610 [Arachis duranensis]
MSTRG.41125	brown	OFUT8	O-FucT domain-containing protein [Cephalotus follicularis]
MSTRG.41172	brown	--	-
MSTRG.41188	brown	--	PREDICTED: uncharacterized protein LOC107482358 [Arachis duranensis]
MSTRG.4121	brown	RGA2	PREDICTED: disease resistance protein RGA2-like [Sesamum indicum]
MSTRG.41219	brown	--	PREDICTED: uncharacterized protein LOC107606583 [Arachis ipaensis]
MSTRG.41354	brown	--	PREDICTED: magnesium transporter MRS2-A, chloroplastic-like [Arachis ipaensis]
MSTRG.41385	brown	--	PREDICTED: uncharacterized protein LOC107471018 isoform X1 [Arachis duranensis]
MSTRG.41417	brown	--	-
MSTRG.41418	brown	--	PREDICTED: uncharacterized protein LOC107458173 [Arachis duranensis]
MSTRG.41442	brown	--	-
MSTRG.41445	brown	--	PREDICTED: leucine-rich repeat extensin-like protein 5 [Arachis ipaensis]
MSTRG.41469	brown	--	-
MSTRG.41514	brown	--	PREDICTED: uncharacterized protein LOC107488623 [Arachis duranensis]
MSTRG.41553	brown	--	-
MSTRG.41590	brown	--	-
MSTRG.41672	brown	--	PREDICTED: uncharacterized protein LOC107635830 [Arachis ipaensis]
MSTRG.41794	brown	--	-
MSTRG.41833	brown	--	-
MSTRG.42167	brown	--	PREDICTED: uncharacterized protein LOC107614766 [Arachis ipaensis]
MSTRG.4230	brown	--	PREDICTED: uncharacterized protein LOC107475785 isoform X2 [Arachis duranensis]
MSTRG.4253	brown	--	-
MSTRG.42732	brown	--	PREDICTED: putative cyclic nucleotide-gated ion channel 15 [Arachis ipaensis]
MSTRG.43032	brown	LSH10	PREDICTED: protein LIGHT-DEPENDENT SHORT HYPOCOTYLS 10 [Arachis ipaensis]
MSTRG.43039	brown	--	PREDICTED: uncharacterized protein LOC107611873 [Arachis ipaensis]
MSTRG.43109	brown	At5g53140	PREDICTED: probable protein phosphatase 2C 76 [Arachis ipaensis]
MSTRG.43178	brown	--	PREDICTED: uncharacterized protein LOC107458173 [Arachis duranensis]
MSTRG.43210	brown	PCMP-E15	PREDICTED: pentatricopeptide repeat-containing protein At2g35030, mitochondrial-like [Arachis ipaensis]
MSTRG.43230	brown	FRS4	PREDICTED: protein FAR1-RELATED SEQUENCE 5-like [Arachis ipaensis]
MSTRG.43283	brown	--	PREDICTED: uncharacterized protein LOC107462630 isoform X1 [Arachis duranensis]
MSTRG.43324	brown	TT9	PREDICTED: ribosomal protein L11 methyltransferase-like isoform X1 [Arachis ipaensis]
MSTRG.43450	brown	--	-
MSTRG.43507	brown	--	PREDICTED: uncharacterized protein LOC107607343 [Arachis ipaensis]
MSTRG.43539	brown	--	PREDICTED: uncharacterized protein LOC107637217 [Arachis ipaensis]
MSTRG.43572	brown	--	PREDICTED: uncharacterized protein LOC107607406 [Arachis ipaensis]
MSTRG.43580	brown	--	-
MSTRG.43603	brown	--	Retrovirus-related Pol polyprotein from transposon TNT 1-94, partial [Cajanus cajan]
MSTRG.43606	brown	--	PREDICTED: uncharacterized protein LOC107618874 isoform X1 [Arachis ipaensis]
MSTRG.43627	brown	--	PREDICTED: GATA zinc finger domain-containing protein 14 [Cicer arietinum]
MSTRG.43640	brown	--	PREDICTED: uncharacterized protein LOC107608051 [Arachis ipaensis]
MSTRG.43650	brown	--	-
MSTRG.43690	brown	MAA3	PREDICTED: probable helicase MAGATAMA 3 isoform X2 [Arachis ipaensis]
MSTRG.43732	brown	--	PREDICTED: myosin-4-like isoform X1 [Arachis ipaensis]
MSTRG.43774	brown	--	PREDICTED: protein NRT1/ PTR FAMILY 4.6-like [Arachis ipaensis]
MSTRG.43910	brown	--	PREDICTED: dolichol kinase EVAN-like [Arachis ipaensis]
MSTRG.43990	brown	EBP2	PREDICTED: probable rRNA-processing protein EBP2 homolog [Arachis ipaensis]
MSTRG.44012	brown	--	PPR containing plant-like protein [Medicago truncatula]
MSTRG.4403	brown	--	PREDICTED: uncharacterized protein LOC107641309 [Arachis ipaensis]
MSTRG.4406	brown	--	PREDICTED: uncharacterized protein LOC107607057, partial [Arachis ipaensis]
MSTRG.44100	brown	At1g67300	PREDICTED: probable plastidic glucose transporter 2 [Arachis ipaensis]
MSTRG.44196	brown	--	PREDICTED: F-box/kelch-repeat protein At3g23880-like [Arachis ipaensis]
MSTRG.44228	brown	--	PREDICTED: protein FAR-RED ELONGATED HYPOCOTYL 3-like [Arachis duranensis]
MSTRG.44284	brown	--	PREDICTED: pentatricopeptide repeat-containing protein At3g18020-like [Arachis duranensis]
MSTRG.44291	brown	--	PREDICTED: TMV resistance protein N-like [Arachis ipaensis]
MSTRG.44300	brown	At5g53140	PREDICTED: probable protein phosphatase 2C 76 [Arachis ipaensis]
MSTRG.44349	brown	--	PREDICTED: uncharacterized protein LOC107611759 [Arachis ipaensis]
MSTRG.44350	brown	--	PREDICTED: uncharacterized protein LOC107608286 [Arachis ipaensis]
MSTRG.44435	brown	--	-
MSTRG.44585	brown	--	PREDICTED: uncharacterized protein LOC107647540 [Arachis ipaensis]
MSTRG.4460	brown	--	PREDICTED: uncharacterized protein LOC107616463 [Arachis ipaensis]
MSTRG.44645	brown	GCN2	PREDICTED: eIF-2-alpha kinase GCN2-like, partial [Arachis ipaensis]
MSTRG.44798	brown	--	PREDICTED: uncharacterized protein LOC107614766 [Arachis ipaensis]
MSTRG.44799	brown	--	PREDICTED: uncharacterized protein LOC107614766 [Arachis ipaensis]
MSTRG.44872	brown	KCS4	PREDICTED: 3-ketoacyl-CoA synthase 4-like [Arachis duranensis]
MSTRG.45025	brown	SKI3	PREDICTED: nuclear export mediator factor Nemf [Arachis ipaensis]
MSTRG.45107	brown	At2g45590	receptor-like kinase [Medicago truncatula]
MSTRG.45181	brown	PBG1	PREDICTED: proteasome subunit beta type-4-like [Lupinus angustifolius]
MSTRG.45236	brown	--	DUF1677 family protein [Medicago truncatula]
MSTRG.45307	brown	--	PREDICTED: uncharacterized protein LOC107614766 [Arachis ipaensis]
MSTRG.45318	brown	--	-
MSTRG.45326	brown	--	PREDICTED: uncharacterized protein LOC107483926 [Arachis duranensis]
MSTRG.45337	brown	--	-
MSTRG.45443	brown	--	PREDICTED: uncharacterized protein LOC107606867 [Arachis ipaensis]
MSTRG.45454	brown	--	PREDICTED: protein FAR1-RELATED SEQUENCE 5-like [Arachis ipaensis]
MSTRG.45463	brown	--	PREDICTED: uncharacterized protein LOC107618828 [Arachis ipaensis]
MSTRG.45529	brown	--	PREDICTED: uncharacterized protein LOC107636895 [Arachis ipaensis]
MSTRG.45544	brown	--	-
MSTRG.45570	brown	TY3B-I	PREDICTED: RNA-directed DNA polymerase homolog [Arachis ipaensis]
MSTRG.45576	brown	--	PREDICTED: uncharacterized protein LOC107643661 [Arachis ipaensis]
MSTRG.45578	brown	--	PREDICTED: transcription factor bHLH51-like [Arachis duranensis]
MSTRG.45622	brown	--	-
MSTRG.45634	brown	--	-
MSTRG.45664	brown	--	PREDICTED: uncharacterized protein LOC107480049 [Arachis duranensis]
MSTRG.45742	brown	--	Wings apart-like protein like [Glycine soja]
MSTRG.45762	brown	--	-
MSTRG.45765	brown	FBL13	PREDICTED: F-box/LRR-repeat protein 13-like isoform X1 [Arachis ipaensis]
MSTRG.4578	brown	2021-08-06	Myb/SANT-like DNA-binding domain protein, partial [Medicago truncatula]
MSTRG.45794	brown	--	PREDICTED: replication protein A 70 kDa DNA-binding subunit-like [Arachis ipaensis]
MSTRG.4580	brown	LPEAT2	PREDICTED: lysophospholipid acyltransferase LPEAT2-like [Arachis duranensis]
MSTRG.45906	brown	--	PREDICTED: disheveled-associated activator of morphogenesis 1-like [Arachis duranensis]
MSTRG.45917	brown	At4g37920	PREDICTED: uncharacterized protein At4g37920, chloroplastic-like [Arachis ipaensis]
MSTRG.45951	brown	--	-
MSTRG.46022	brown	--	PREDICTED: uncharacterized protein LOC107488562 [Arachis duranensis]
MSTRG.46057	brown	--	-
MSTRG.46162	brown	--	PREDICTED: uncharacterized protein LOC107468001 [Arachis duranensis]
MSTRG.46191	brown	--	-
MSTRG.46222	brown	--	PREDICTED: uncharacterized protein LOC107641790 [Arachis ipaensis]
MSTRG.46265	brown	--	PREDICTED: uncharacterized protein LOC107607539 [Arachis ipaensis]
MSTRG.46722	brown	CNGC6	cyclic nucleotide-gated ion channel 1-like isoform X2 [Cajanus cajan]
MSTRG.46871	brown	--	myb-like protein X [Cajanus cajan]
MSTRG.4689	brown	ADK2	Adenosine kinase 1, partial [Noccaea caerulescens]
MSTRG.47155	brown	--	PREDICTED: protein STRUBBELIG-RECEPTOR FAMILY 7-like [Arachis ipaensis]
MSTRG.47468	brown	--	PREDICTED: uncharacterized protein LOC107624451 [Arachis ipaensis]
MSTRG.4750	brown	--	PREDICTED: pentatricopeptide repeat-containing protein At1g11710, mitochondrial-like isoform X2 [Arachis duranensis]
MSTRG.47538	brown	--	PREDICTED: uncharacterized protein LOC107622362 [Arachis ipaensis]
MSTRG.47590	brown	--	PREDICTED: kinesin-4 [Arachis ipaensis]
MSTRG.47744	brown	--	PREDICTED: uncharacterized protein LOC107487000 [Arachis duranensis]
MSTRG.47770	brown	--	-
MSTRG.47945	brown	--	PREDICTED: uncharacterized protein LOC107469353 [Arachis duranensis]
MSTRG.47997	brown	--	PREDICTED: uncharacterized protein LOC107628805 [Arachis ipaensis]
MSTRG.48171	brown	--	PREDICTED: uncharacterized protein LOC107464219 isoform X1 [Arachis duranensis]
MSTRG.48199	brown	--	-
MSTRG.48200	brown	--	-
MSTRG.48219	brown	--	-
MSTRG.48227	brown	--	PREDICTED: uncharacterized protein LOC107622373 isoform X3 [Arachis ipaensis]
MSTRG.48238	brown	--	-
MSTRG.48249	brown	--	-
MSTRG.48296	brown	--	PREDICTED: zinc finger BED domain-containing protein RICESLEEPER 3-like [Arachis ipaensis]
MSTRG.48352	brown	--	PREDICTED: uncharacterized protein LOC107622287 isoform X1 [Arachis ipaensis]
MSTRG.48363	brown	ch3-I	histone H3 [Zea mays]
MSTRG.48370	brown	--	PREDICTED: mucin-2-like [Arachis ipaensis]
MSTRG.48385	brown	--	PREDICTED: uncharacterized protein LOC107611183 [Arachis ipaensis]
MSTRG.48518	brown	--	PREDICTED: uncharacterized protein LOC107485256 [Arachis duranensis]
MSTRG.48568	brown	--	PREDICTED: myb-like protein I isoform X1 [Arachis ipaensis]
MSTRG.48735	brown	At2g35920	PREDICTED: ABSCISIC ACID-INSENSITIVE 5-like protein 2, partial [Arachis ipaensis]
MSTRG.48754	brown	--	PREDICTED: uncharacterized protein LOC107624253 isoform X1 [Arachis ipaensis]
MSTRG.48767	brown	--	O-FucT domain-containing protein [Cephalotus follicularis]
MSTRG.48819	brown	--	PREDICTED: uncharacterized protein LOC107621124 [Arachis ipaensis]
MSTRG.48921	brown	--	PREDICTED: uncharacterized protein LOC107624485 isoform X1 [Arachis ipaensis]
MSTRG.48969	brown	--	-
MSTRG.48973	brown	atpaf1	PREDICTED: ATP synthase mitochondrial F1 complex assembly factor 1-like [Cicer arietinum]
MSTRG.49503	brown	--	-
MSTRG.49651	brown	--	PREDICTED: involucrin-like [Arachis duranensis]
MSTRG.49730	brown	--	PREDICTED: involucrin-like [Arachis duranensis]
MSTRG.49734	brown	--	-
MSTRG.5032	brown	XI-K	PREDICTED: myosin-17-like isoform X1 [Arachis duranensis]
MSTRG.5432	brown	--	PREDICTED: uncharacterized protein LOC107464590 [Arachis duranensis]
MSTRG.5453	brown	--	PREDICTED: zinc finger BED domain-containing protein RICESLEEPER 1-like [Arachis ipaensis]
MSTRG.5558	brown	--	PREDICTED: uncharacterized protein LOC107474587 isoform X1 [Arachis duranensis]
MSTRG.5570	brown	AHK3	PREDICTED: histidine kinase 3-like [Arachis ipaensis]
MSTRG.5589	brown	--	PREDICTED: pentatricopeptide repeat-containing protein At4g16835, mitochondrial-like [Arachis duranensis]
MSTRG.5668	brown	--	-
MSTRG.5757	brown	--	PREDICTED: DNA ligase 1-like [Arachis duranensis]
MSTRG.576	brown	--	PREDICTED: uncharacterized protein LOC107615542 [Arachis ipaensis]
MSTRG.5778	brown	CAF1-11	PREDICTED: probable CCR4-associated factor 1 homolog 11 [Arachis ipaensis]
MSTRG.5879	brown	--	PREDICTED: uncharacterized protein LOC107608533 [Arachis ipaensis]
MSTRG.5899	brown	At3g15360	PREDICTED: thioredoxin [Arachis ipaensis]
MSTRG.5931	brown	--	-
MSTRG.6001	brown	--	PREDICTED: probable protein phosphatase 2C 27 [Arachis ipaensis]
MSTRG.6049	brown	--	PREDICTED: uncharacterized protein LOC107478753 [Arachis duranensis]
MSTRG.6057	brown	FQR1	PREDICTED: uncharacterized protein LOC107643741 [Arachis ipaensis]
MSTRG.6058	brown	--	-
MSTRG.6189	brown	PCMP-H12	PREDICTED: pentatricopeptide repeat-containing protein At4g21065-like [Arachis duranensis]
MSTRG.6205	brown	--	PREDICTED: LOW QUALITY PROTEIN: serine/arginine repetitive matrix protein 1 [Arachis ipaensis]
MSTRG.6213	brown	--	PREDICTED: uncharacterized protein LOC107469686 [Arachis duranensis]
MSTRG.6233	brown	--	PREDICTED: uncharacterized protein LOC107458173 [Arachis duranensis]
MSTRG.6249	brown	--	-
MSTRG.6250	brown	--	-
MSTRG.6280	brown	--	PREDICTED: uncharacterized protein LOC107633226 [Arachis ipaensis]
MSTRG.6306	brown	--	PREDICTED: uncharacterized aarF domain-containing protein kinase 1 isoform X3 [Arachis duranensis]
MSTRG.6328	brown	--	PREDICTED: uncharacterized protein LOC107469686 [Arachis duranensis]
MSTRG.6331	brown	--	PREDICTED: uncharacterized protein LOC107608459 [Arachis ipaensis]
MSTRG.6354	brown	--	PREDICTED: clathrin interactor EPSIN 1 [Arachis ipaensis]
MSTRG.6362	brown	--	PREDICTED: uncharacterized protein LOC107615703 [Arachis ipaensis]
MSTRG.6414	brown	--	PREDICTED: uncharacterized protein LOC107479552 [Arachis duranensis]
MSTRG.6427	brown	--	-
MSTRG.6455	brown	--	PREDICTED: traB domain-containing protein-like [Arachis duranensis]
MSTRG.6509	brown	--	PREDICTED: uncharacterized protein LOC107612205 isoform X1 [Arachis ipaensis]
MSTRG.6518	brown	FDM5	PREDICTED: factor of DNA methylation 1-like isoform X1 [Arachis duranensis]
MSTRG.6558	brown	CYP86A22	PREDICTED: cytochrome P450 86A22 [Arachis duranensis]
MSTRG.6582	brown	--	PREDICTED: uncharacterized protein LOC107458506 [Arachis duranensis]
MSTRG.6587	brown	--	PREDICTED: uncharacterized protein LOC107479980 [Arachis duranensis]
MSTRG.6602	brown	--	type 2 DNA topoisomerase 6 subunit B-like isoform X2 [Cajanus cajan]
MSTRG.6690	brown	--	PREDICTED: zinc finger BED domain-containing protein RICESLEEPER 3-like [Arachis duranensis]
MSTRG.6782	brown	--	PREDICTED: uncharacterized protein LOC109236004 [Nicotiana attenuata]
MSTRG.6814	brown	--	PREDICTED: uncharacterized protein LOC107472460, partial [Arachis duranensis]
MSTRG.6878	brown	--	PREDICTED: uncharacterized protein LOC107480507 [Arachis duranensis]
MSTRG.6983	brown	FHY3	PREDICTED: protein FAR1-RELATED SEQUENCE 5-like [Arachis ipaensis]
MSTRG.7011	brown	PPCS2	PREDICTED: phosphopantothenate--cysteine ligase 2-like isoform X2 [Arachis duranensis]
MSTRG.7037	brown	RMA1H1	PREDICTED: E3 ubiquitin-protein ligase RMA1H1-like [Arachis duranensis]
MSTRG.704	brown	--	PREDICTED: exocyst complex component EXO70B1-like [Arachis duranensis]
MSTRG.7401	brown	TCP14	PREDICTED: transcription factor TCP14-like, partial [Arachis ipaensis]
MSTRG.7522	brown	--	PREDICTED: uncharacterized protein LOC107639927 [Arachis ipaensis]
MSTRG.76	brown	VIII-1	PREDICTED: proline-rich receptor-like protein kinase PERK2 [Arachis ipaensis]
MSTRG.7642	brown	EXL2	PREDICTED: protein EXORDIUM-like 2 [Arachis ipaensis]
MSTRG.8243	brown	--	-
MSTRG.8256	brown	CTPA3	PREDICTED: polynucleotide 3'-phosphatase ZDP [Arachis duranensis]
MSTRG.830	brown	--	PREDICTED: uncharacterized protein LOC107457914 [Arachis duranensis]
MSTRG.8409	brown	--	zf-CCHC domain-containing protein/DUF4219 domain-containing protein/UBN2 domain-containing protein [Cephalotus follicularis]
MSTRG.847	brown	--	PREDICTED: uncharacterized protein LOC107473850 [Arachis duranensis]
MSTRG.8525	brown	--	PREDICTED: uncharacterized protein LOC107496073 [Arachis duranensis]
MSTRG.8626	brown	--	E3 ubiquitin-protein ligase MARCH4 [Glycine soja]
MSTRG.8654	brown	--	PREDICTED: uncharacterized protein LOC107615542 [Arachis ipaensis]
MSTRG.8746	brown	--	PREDICTED: protein FAR1-RELATED SEQUENCE 5-like [Arachis ipaensis]
MSTRG.8790	brown	NDPK1	PREDICTED: nucleoside diphosphate kinase 1 [Arachis ipaensis]
MSTRG.880	brown	--	PREDICTED: serine/arginine repetitive matrix protein 1-like [Arachis ipaensis]
MSTRG.886	brown	--	-
MSTRG.8886	brown	--	PREDICTED: uncharacterized protein LOC107495915 [Arachis duranensis]
MSTRG.890	brown	--	PREDICTED: uncharacterized protein LOC107482483 isoform X1 [Arachis duranensis]
MSTRG.8991	brown	--	PREDICTED: uncharacterized protein LOC107473688 [Arachis duranensis]
MSTRG.9006	brown	--	PREDICTED: uncharacterized protein LOC107466367 [Arachis duranensis]
MSTRG.9084	brown	--	-
MSTRG.913	brown	--	PREDICTED: uncharacterized protein LOC107608459 [Arachis ipaensis]
MSTRG.9142	brown	OFUT35	DUF246 domain-containing protein [Glycine soja]
MSTRG.9144	brown	--	PREDICTED: uncharacterized protein LOC107640619 [Arachis ipaensis]
MSTRG.9145	brown	--	PREDICTED: uncharacterized protein LOC107641940 [Arachis ipaensis]
MSTRG.9154	brown	--	PREDICTED: uncharacterized protein LOC107618874 isoform X1 [Arachis ipaensis]
MSTRG.9226	brown	SAR1A	PREDICTED: syntaxin-22-like [Arachis duranensis]
MSTRG.9227	brown	--	PREDICTED: uncharacterized protein LOC107464595 [Arachis duranensis]
MSTRG.9247	brown	--	PREDICTED: uncharacterized protein LOC107458173 [Arachis duranensis]
MSTRG.9264	brown	--	-
MSTRG.9272	brown	--	-
MSTRG.9273	brown	--	-
MSTRG.9300	brown	--	retrotransposon gag protein [Arachis hypogaea]
MSTRG.9318	brown	--	PREDICTED: uncharacterized protein LOC107479924 [Arachis duranensis]
MSTRG.9384	brown	--	PREDICTED: RNA polymerase sigma factor sigB-like [Arachis duranensis]
MSTRG.941	brown	--	PREDICTED: uncharacterized protein LOC107469686 [Arachis duranensis]
MSTRG.9419	brown	--	Retrovirus-related Pol polyprotein from transposon TNT 1-94, partial [Cajanus cajan]
MSTRG.9449	brown	--	PREDICTED: uncharacterized protein LOC107645026 [Arachis ipaensis]
MSTRG.9463	brown	--	PREDICTED: uncharacterized protein LOC107620896 [Arachis ipaensis]
MSTRG.9564	brown	--	PREDICTED: uncharacterized protein LOC107485444 [Arachis duranensis]
MSTRG.9596	brown	--	PREDICTED: uncharacterized protein LOC107485527 isoform X2 [Arachis duranensis]
MSTRG.9607	brown	--	-
MSTRG.9612	brown	--	PREDICTED: uncharacterized protein LOC107485497 [Arachis duranensis]
MSTRG.964	brown	--	PREDICTED: uncharacterized protein LOC107484528 [Arachis duranensis]
MSTRG.9678	brown	--	PREDICTED: transcription factor MYB51-like [Arachis duranensis]
MSTRG.9683	brown	--	PREDICTED: transcription factor bHLH51-like [Arachis duranensis]
MSTRG.9692	brown	FAR1	PREDICTED: protein FAR1-RELATED SEQUENCE 5-like [Arachis ipaensis]
MSTRG.9694	brown	--	PREDICTED: uncharacterized protein LOC107485671 isoform X1 [Arachis duranensis]
MSTRG.9697	brown	SUC1	PREDICTED: sucrose transport protein SUC1-like isoform X3 [Arachis duranensis]
MSTRG.9720	brown	--	PREDICTED: uncharacterized protein LOC107465140 [Arachis duranensis]
MSTRG.974	brown	RBM42	PREDICTED: RNA-binding protein 42-like, partial [Arachis duranensis]
MSTRG.9895	brown	MAA3	PREDICTED: probable helicase MAGATAMA 3 isoform X2 [Arachis ipaensis]
MSTRG.9991	brown	--	PREDICTED: RNA polymerase sigma factor sigB-like [Arachis duranensis]
arahy.005C3Q	brown	samhd1	deoxynucleoside triphosphate triphosphohydrolase SAMHD1 homolog isoform X2 [Glycine max]
arahy.00WUVK	brown	PUX8	FAS-associated factor 2-like [Glycine max]
arahy.011VCX	brown	SYP132	syntaxin of plants 132
arahy.01GDC8	brown	LCKB2	Diacylglycerol kinase family protein
arahy.02BAGQ	brown	SF1	RNA-binding protein 42-like [Glycine max]
arahy.039TZW	brown	TSN1	staphylococcal nuclease domain-containing protein 1-like [Glycine max]
arahy.03A2T4	brown	GDH1	glutamate dehydrogenase 1
arahy.03S8MC	brown	--	uncharacterized protein LOC100792679 isoform X2 [Glycine max]
arahy.03TW92	brown	mcfF	mitochondrial substrate carrier family protein B-like [Glycine max]
arahy.043YES	brown	SAP8	zinc finger A20 and AN1 domain stress-associated protein
arahy.045FSF	brown	RBOHD	Unknown protein
arahy.048ZT0	brown	PANK2	pantothenate kinase 2
arahy.050WC1	brown	At5g51130	7SK snRNA methylphosphate capping enzyme n=8 Tax=Boreoeutheria RepID=S7MKB0_MYOBR
arahy.05M0GB	brown	CYC2	3-oxo-delta(4,5)-steroid 5-beta-reductase-like protein
arahy.05XRSU	brown	PCMP-H23	Pentatricopeptide repeat (PPR) superfamily protein
arahy.063DHX	brown	PIP5K9	Phosphatidylinositol-4-phosphate 5-kinase family protein
arahy.0692WS	brown	FDM4	XH/XS domain-containing protein
arahy.06DG1T	brown	Nt5dc3	HAD-superfamily hydrolase, subfamily IG, 5'-nucleotidase
arahy.07Q55L	brown	U2AF35A	splicing factor U2af small subunit A-like protein
arahy.0825KH	brown	HIPL1	HIPL1 protein-like [Glycine max]
arahy.08G0EU	brown	ISS1	aspartate aminotransferase
arahy.08YRK9	brown	REFA1	GTP-binding elongation factor Tu family protein
arahy.09PW0C	brown	PUB14	U-box domain-containing protein 4 [Glycine max]
arahy.09ZGYD	brown	TRP3	telomere repeat-binding protein 3-like isoform X2 [Glycine max]
arahy.0AB4R7	brown	POD1	protein POLLEN DEFECTIVE IN GUIDANCE 1-like isoform X1 [Glycine max]
arahy.0AQ0IW	brown	RNU1	U1 small nuclear ribonucleoprotein 70 kDa protein, putative
arahy.0BX3U4	brown	rio2	Serine/Threonine-kinase rio2
arahy.0C8612	brown	LDL2	lysine-specific histone demethylase 1 homolog 2-like [Glycine max]
arahy.0CK08N	brown	--	Unknown protein
arahy.0CRJ7F	brown	At4g27595	interactor of constitutive active ROPs 2, chloroplastic-like isoform X8 [Glycine max]
arahy.0D25G8	brown	asd	aspartate-semialdehyde dehydrogenase
arahy.0D8FTQ	brown	Mnat1	CDK-activating kinase assembly factor MAT1, putative
arahy.0DF5JX	brown	At3g46220	E3 UFM1-protein ligase-like protein
arahy.0E73VR	brown	CRK4	Calcium/calmodulin-dependent serine/threonine-protein kinase 1 n=5 Tax=Oryza RepID=CAMK1_ORYSJ
arahy.0F7AFP	brown	--	PRKR-interacting protein 1-like [Glycine max]
arahy.0F9H7B	brown	RS31	arginine/serine-rich-splicing factor RSP31-like isoform X2 [Glycine max]
arahy.0F9TFU	brown	--	HIT zinc finger ; PAPA-1-like conserved region
arahy.0FM3Z5	brown	NSF	vesicle-fusing ATPase-like [Glycine max]
arahy.0FWB0U	brown	NLP7	Plant regulator RWP-RK family protein
arahy.0G1QRI	brown	STR11	Rhodanese/Cell cycle control phosphatase superfamily protein
arahy.0G7P48	brown	KDSA	2-dehydro-3-deoxyphosphooctonate aldolase
arahy.0G90TE	brown	PCMP-A2	Pentatricopeptide repeat (PPR) superfamily protein
arahy.0GK98G	brown	ERDJ2A	DNAJ heat shock family protein
arahy.0GZ16Q	brown	PUB8	U-box domain-containing protein 8-like [Glycine max]
arahy.0HR61J	brown	ALDH6B2	methylmalonate-semialdehyde dehydrogenase
arahy.0I87EX	brown	--	anthranilate phosphoribosyltransferase, putative
arahy.0IBU2N	brown	At4g38150	Pentatricopeptide repeat (PPR) superfamily protein
arahy.0IE2SQ	brown	SDH6	uncharacterized protein LOC100777981 isoform X3 [Glycine max]
arahy.0IGH5Q	brown	TBC1D22B	Rab GTPase activator
arahy.0IT1NR	brown	PERK1	Protein kinase superfamily protein
arahy.0K24RL	brown	--	Unknown protein
arahy.0KD87G	brown	CFM3	chloroplastic group IIA intron splicing facilitator CRS1, chloroplastic-like [Glycine max]
arahy.0KDC5W	brown	GS1	glutamine synthetase 1.3
arahy.0KLV1J	brown	APRF1	WD repeat-containing protein 82-like isoform X1 [Glycine max]
arahy.0N164V	brown	B'BETA	Protein phosphatase 2A regulatory B subunit family protein
arahy.0NE75U	brown	MRS2-3	magnesium transporter 4
arahy.0NEN23	brown	TFCE	Pentatricopeptide repeat (PPR) superfamily protein
arahy.0NG2AS	brown	Os10g0415600	uncharacterized protein LOC547668 isoform X7 [Glycine max]
arahy.0NSC2B	brown	PSD1	phosphatidylserine decarboxylase 1
arahy.0NW2H0	brown	NAA10	Acetyltransferase complex ard1 subunit, putative n=6 Tax=rosids RepID=B9RVI5_RICCO
arahy.0PDV4E	brown	ELOC	transcription elongation factor B
arahy.0PI3PU	brown	AAK6	adenylate kinase, putative
arahy.0QZG7W	brown	--	nucleic acid binding
arahy.0R3YHS	brown	CNX1	Calcium-binding protein cnx1 n=1 Tax=Ophiostoma piceae (strain UAMH 11346) RepID=S3BU07_OPHP1
arahy.0R4MPN	brown	--	Uncharacterized conserved protein (DUF2215)
arahy.0RJM1Q	brown	UGD4	UDP-glucose 6-dehydrogenase family protein
arahy.0T0464	brown	SPI	Beige/BEACH domain ; WD domain, G-beta repeat protein
arahy.0T8X31	brown	DURF2	E3 ubiquitin-protein ligase RING1-like [Glycine max]
arahy.0TI1L3	brown	BRG3	SBP (S-ribonuclease binding protein) family protein
arahy.0TKH4B	brown	RPS12A	40S ribosomal protein S12 n=2 Tax=Papilionoideae RepID=I1KVK9_SOYBN
arahy.0UP1AG	brown	HISN7	Histidinol-phosphate phosphatase, putative, inositol monophosphatase n=1 Tax=Erythrobacter sp. SD-21 RepID=A5PET5_9SPHN
arahy.0UXM82	brown	yipf5	Integral membrane Yip1 family protein
arahy.0V448S	brown	NRPB5A	DNA-directed RNA polymerase II
arahy.0VBM10	brown	--	unknown protein; FUNCTIONS IN: molecular_function unknown; INVOLVED IN: biological_process unknown; LOCATED IN: cellular_component unknown; EXPRESSED IN: 22 plant structures; EXPRESSED DURING: 11 growth stages; Has 42 Blast hits to 42 proteins in 12 species: Archae - 0; Bacteria - 0; Metazoa - 4; Fungi - 0; Plants - 37; Viruses - 0; Other Eukaryotes - 1 (source: NCBI BLink).
arahy.0W74TV	brown	SMTA	homocysteine methyltransferase 2
arahy.0X1Y55	brown	NPF4.3	peptide transporter 1
arahy.0Y9XYY	brown	FTSH8	ATP-dependent zinc metalloprotease FtsH-like [Glycine max]
arahy.0YC2K0	brown	KPNB1	importin subunit beta-like protein
arahy.0YHR6E	brown	--	uncharacterized protein At1g10890-like isoform X1 [Glycine max]
arahy.0YR97U	brown	PDIL2-3	protein disulfide isomerase-like protein
arahy.0YRW91	brown	SRK2E	serine/threonine-protein kinase SRK2E-like isoform 1 [Glycine max]
arahy.0Z8AMS	brown	--	Unknown protein
arahy.102QYH	brown	At4g03415	Protein phosphatase 2C family protein
arahy.106C79	brown	PAT10	DHHC-type zinc finger family protein
arahy.10EEU4	brown	--	uncharacterized protein LOC100788114 isoform X6 [Glycine max]
arahy.10QHSJ	brown	--	cell wall protein AWA1-like isoform X1 [Glycine max]
arahy.11FWLC	brown	--	Unknown protein
arahy.11HLTU	brown	--	Unknown protein
arahy.11IQ35	brown	pyrH	uridylate kinase
arahy.11LC84	brown	--	SWIM zinc finger family protein
arahy.11YZMF	brown	CCME	cytochrome C-type biogenesis protein CcmE
arahy.129W39	brown	GATA28	GATA transcription factor 26
arahy.12D61J	brown	At4g30420	nodulin MtN21 /EamA-like transporter family protein
arahy.12ETBG	brown	HERC2	Regulator of chromosome condensation (RCC1) family protein
arahy.12F6XV	brown	APE2	DNA-(apurinic or apyrimidinic site) lyase 2-like [Glycine max]
arahy.12GH5N	brown	TPR1	TOPLESS-related 1
arahy.12MHRI	brown	ASE1	amidophosphoribosyltransferase 1, chloroplastic-like [Glycine max]
arahy.12V79R	brown	TBL10	protein YLS7-like [Glycine max]
arahy.12ZBK0	brown	impdh	inosine-5'-monophosphate dehydrogenase
arahy.133YU3	brown	--	Serine/threonine protein phosphatase family protein
arahy.133ZSG	brown	KCS4	3-ketoacyl-CoA synthase 4
arahy.138YHT	brown	SRFR1	Tetratricopeptide repeat (TPR)-like superfamily protein
arahy.13CNWC	brown	VIP6	RNA polymerase-associated protein CTR9 homolog [Glycine max]
arahy.13JYDQ	brown	--	Unknown protein
arahy.13RJNQ	brown	--	uncharacterized protein LOC102659744 [Glycine max]
arahy.145GHR	brown	CP29B	RNA-binding protein 39-like [Glycine max]
arahy.146QCX	brown	RNP1	RNA-binding protein 1-like [Glycine max]
arahy.14A9Q3	brown	znf830	zinc finger protein 830-like [Glycine max]
arahy.14SSB6	brown	ELF3	protein EARLY FLOWERING 3-like isoform X2 [Glycine max]
arahy.14WQKG	brown	At1g54610	Protein kinase superfamily protein
arahy.15JPRS	brown	Os10g0467600	eukaryotic translation initiation factor 4E
arahy.15NAG1	brown	--	Unknown protein
arahy.15Y2JY	brown	CTR1	Protein kinase superfamily protein
arahy.16527J	brown	At2g47970	Nuclear pore localisation protein NPL4
arahy.16KDXT	brown	DDB_G0290555	Transducin/WD40 repeat-like superfamily protein
arahy.16SP4W	brown	ATG3	autophagy 3 (APG3) protein
arahy.177SMQ	brown	--	Unknown protein
arahy.17MV76	brown	LIGB	catalytic LigB subunit of aromatic ring-opening dioxygenase family
arahy.18DP1Z	brown	--	uncharacterized protein LOC100817451 [Glycine max]
arahy.18FPP0	brown	FAM214B	uncharacterized protein LOC100793556 isoform X7 [Glycine max]
arahy.18GXDP	brown	OVA6	proline--tRNA ligase-like [Glycine max]
arahy.19AV4I	brown	DRP2A	dynamin-like 3
arahy.1A0WRJ	brown	ELP1	elongator complex protein
arahy.1A1X10	brown	--	Unknown protein
arahy.1A97AW	brown	--	WAPL (Wings apart-like protein regulation of heterochromatin) protein
arahy.1B2Z8C	brown	VIP1	bZIP family transcription factor
arahy.1BA0J6	brown	At3g47200	UPF0481 protein At3g47200-like [Glycine max]
arahy.1BQ3FB	brown	PP2A	serine/threonine protein phosphatase 2A
arahy.1BU1FJ	brown	POPTRDRAFT_821063	alanine-tRNA ligase
arahy.1CQ2W9	brown	--	uncharacterized protein LOC100800721 [Glycine max]
arahy.1D0QNK	brown	RPRD1B	regulation of nuclear pre-mRNA domain-containing protein 1A-like isoform X2 [Glycine max]
arahy.1DD10A	brown	SKL1	shikimate kinase like 1
arahy.1DQJ64	brown	CRP1	Pentatricopeptide repeat (PPR-like) superfamily protein
arahy.1E5VBP	brown	MKK3	Protein kinase superfamily protein
arahy.1E9R5B	brown	NLP8	Plant regulator RWP-RK family protein
arahy.1EV8X8	brown	At2g20020	CRS2-associated factor 1, chloroplastic-like [Glycine max]
arahy.1F18R3	brown	At3g26670	magnesium transporter NIPA3 isoform X2 [Glycine max]
arahy.1GV9IW	brown	FBP	fructose-1,6-bisphosphatase
arahy.1H3LZD	brown	STY17	Protein kinase superfamily protein
arahy.1H6NB8	brown	ADNT1	mitochondrial substrate carrier family protein B-like [Glycine max]
arahy.1I8MYZ	brown	--	Myb/SANT-like DNA-binding domain protein
arahy.1IS8IE	brown	RH39	DEAD-box ATP-dependent RNA helicase
arahy.1IW9Y2	brown	PMA4	plasma membrane H+-ATPase
arahy.1JMX4I	brown	SIRB	sirohydrochlorin ferrochelatase B
arahy.1KA2VU	brown	SOT12	sulfotransferase 4B
arahy.1KHC65	brown	RH48	DEAD-box ATP-dependent RNA helicase family protein
arahy.1KVD1S	brown	DHQS	3-dehydroquinate synthase, putative
arahy.1L2ERA	brown	--	SET domain-containing protein
arahy.1L9BHC	brown	SDRA	NAD(P)-binding Rossmann-fold superfamily protein
arahy.1M6YYJ	brown	VIP2	RNA polymerase II-associated factor 1 homolog isoform X2 [Glycine max]
arahy.1N90UZ	brown	ARFRP1	ADP-ribosylation factor 1
arahy.1P8C08	brown	der	GTP binding; GTP binding
arahy.1PFQ5M	brown	RRP45B	Exosome complex exonuclease RRP45 n=3 Tax=Papilionoideae RepID=G7IP72_MEDTR
arahy.1PS119	brown	--	Unknown protein
arahy.1PS8SX	brown	--	membrane protein
arahy.1Q3Q3C	brown	PPR4	pentatricopeptide (PPR) repeat-containing protein
arahy.1Q3TB5	brown	CKB3	casein kinase II beta subunit 4
arahy.1QJ78E	brown	ATHB-13	DNA-binding protein n=1 Tax=Catharanthus roseus RepID=A1DR78_CATRO
arahy.1QMW5J	brown	BZIP17	TGACG-sequence-specific DNA-binding protein TGA-1B n=1 Tax=Morus notabilis RepID=W9SF09_9ROSA
arahy.1RFZ00	brown	--	CW-type Zinc Finger
arahy.1SK6FC	brown	MEFG1	elongation factor Tu GTP-binding domain protein
arahy.1SN9CK	brown	SYP22	syntaxin, putative
arahy.1T3PYK	brown	GSH2	glutathione synthetase 2
arahy.1TT2GW	brown	DRP2A	dynamin-like 3
arahy.1UBI84	brown	URT1	glyoxylate/hydroxypyruvate reductase HPR3-like isoform X1 [Glycine max]
arahy.1UQX8S	brown	SDHAF2	Succinate dehydrogenase assembly factor 2 n=6 Tax=Camelineae RepID=F4KBT8_ARATH
arahy.1W779N	brown	APK3	adenylyl-sulfate kinase 3-like isoform X3 [Glycine max]
arahy.1W9K9Y	brown	PLGG1	membrane protein, putative
arahy.1XI841	brown	TRAF1A	MATH domain-containing protein At5g43560-like isoform X1 [Glycine max]
arahy.1YAE55	brown	At3g42630	Pentatricopeptide repeat (PPR) superfamily protein
arahy.1YX8TX	brown	FRS1	protein FAR1-RELATED SEQUENCE 2-like isoform X3 [Glycine max]
arahy.1Z9DBD	brown	TPS1	trehalose-6-phosphate synthase
arahy.1ZYH04	brown	CIP8	RING finger protein 44-like [Glycine max]
arahy.1ZZE7Q	brown	At4g27220	ATP binding; GTP binding; nucleotide binding; nucleoside-triphosphatases
arahy.208RF6	brown	MEKK1	protein kinase family protein
arahy.20M0Y1	brown	--	Unknown protein
arahy.21ET8L	brown	mrnC	Ribonuclease III family protein
arahy.22LF0C	brown	FLXL3	myosin-like protein
arahy.23BIS9	brown	OVA1	ATP binding; valine-tRNA ligases; aminoacyl-tRNA ligases; nucleotide binding; ATP binding; aminoacyl-tRNA ligases
arahy.23D8N6	brown	TMEM184A	transmembrane protein 184A-like [Glycine max]
arahy.23KKED	brown	GLTP1	glycolipid transfer protein 1
arahy.240DSL	brown	IRKI	uncharacterized protein LOC100789428 [Glycine max]
arahy.240KDJ	brown	yoaA	acetyltransferase (GNAT) domain protein
arahy.24ECRJ	brown	CINV2	alkaline/neutral invertase
arahy.24XUJ9	brown	IRL5	probable leucine-rich repeat receptor-like protein kinase At1g35710-like [Glycine max]
arahy.253MNK	brown	--	DnaJ/Hsp40 cysteine-rich domain superfamily protein
arahy.253UZ6	brown	KEA2	Kef-type K+ transport system, membrane component n=1 Tax=Methylophaga aminisulfidivorans MP RepID=F5SYA9_9GAMM
arahy.254HEG	brown	IPT9	tRNA dimethylallyltransferase
arahy.25S2F8	brown	--	uncharacterized protein LOC100788705 [Glycine max]
arahy.26IG8H	brown	At1g13580	LAG1 longevity assurance homolog 3
arahy.26W00C	brown	usp106	RNA-binding LUC7-like protein
arahy.28TJ89	brown	ATJ15	Chaperone DnaJ-domain superfamily protein
arahy.28W6CD	brown	usp106	RNA-binding LUC7-like protein
arahy.29J2UD	brown	At3g09310	membrane protein insertion efficiency factor, putative
arahy.2A1XYJ	brown	BIO2	biotin synthase-like [Glycine max]
arahy.2A2X48	brown	MTPC4	Membrane protein HUEL (Cation efflux superfamily) (ISS) n=1 Tax=Ostreococcus tauri RepID=Q01GU4_OSTTA
arahy.2AA9DZ	brown	--	NAC domain protein
arahy.2B8SX0	brown	--	uncharacterized protein LOC100781148 isoform X2 [Glycine max]
arahy.2C7MHE	brown	GP1	polygalacturonase non-catalytic protein
arahy.2CYW67	brown	MED9	mediator of RNA polymerase II transcription subunit 9-like [Glycine max]
arahy.2D2WCL	brown	RNP1	RNA-binding protein 1-like [Glycine max]
arahy.2DG9CD	brown	memo1	AmmeMemoRadiSam system protein B
arahy.2E8PRH	brown	--	arginine/serine-rich protein PNISR-like [Glycine max]
arahy.2FPW0W	brown	At3g23020	Pentatricopeptide repeat (PPR) superfamily protein
arahy.2FQ9M1	brown	SEU	transcriptional corepressor SEUSS-like isoform X2 [Glycine max]
arahy.2G0Z8B	brown	PRXQ	Alkyl hydroperoxide reductase/ Thiol specific antioxidant/ Mal allergen n=1 Tax=Krokinobacter sp. (strain 4H-3-7-5) RepID=F4AXI1_KROS4
arahy.2GB72X	brown	PSRP1	30S ribosomal protein, putative
arahy.2H5V0G	brown	UVR8	Regulator of chromosome condensation (RCC1) family protein
arahy.2H7I9L	brown	RID2	S-adenosyl-L-methionine-dependent methyltransferase
arahy.2IZ2Y4	brown	RGA2	LRR and NB-ARC domain disease resistance protein
arahy.2J20F7	brown	--	Haloacid dehalogenase-like hydrolase (HAD) superfamily protein
arahy.2J4WVY	brown	XRN4	exoribonuclease 4
arahy.2KFK0B	brown	BI-1	BAX inhibitor 1
arahy.2L0PS7	brown	relA	RELA/SPOT homolog 1
arahy.2L6AT5	brown	--	Cellular nucleic acid-binding protein n=2 Tax=Verticillium RepID=C9S6J1_VERA1
arahy.2LKP7I	brown	CRK7	Protein kinase superfamily protein
arahy.2LQ1ZN	brown	--	Major facilitator superfamily protein
arahy.2LS7ZQ	brown	--	proteasome assembly chaperone-like protein
arahy.2M6GB4	brown	At5g15010	Pentatricopeptide repeat (PPR) superfamily protein
arahy.2M6VYA	brown	--	Transducin/WD40 repeat-like superfamily protein
arahy.2M8W8F	brown	At5g41620	uncharacterized protein At5g41620-like [Glycine max]
arahy.2MM3YT	brown	At3g56470	F-box family protein
arahy.2N7XA4	brown	SNRNP48	uncharacterized protein LOC100803944 isoform X3 [Glycine max]
arahy.2NAN3W	brown	Trappc12	trafficking protein particle complex subunit 12-like [Glycine max]
arahy.2P4BCH	brown	Os07g0190000	1-deoxy-D-xylulose 5-phosphate synthase 1
arahy.2PT66T	brown	XRCC3	DNA repair (Rad51) family protein
arahy.2Q65GK	brown	--	myb-like protein X-like isoform X2 [Glycine max]
arahy.2Q8IWK	brown	STIPL1	GC-rich sequence DNA-binding factor-like protein with Tuftelin interacting domain
arahy.2R0TK7	brown	KIN17	DNA/RNA-binding protein Kin17, conserved region
arahy.2R737Y	brown	Dscr3	down syndrome critical region protein, putative
arahy.2R7T4K	brown	FZL	GTP-binding protein engA n=1 Tax=Medicago truncatula RepID=G7IED3_MEDTR
arahy.2RB1YT	brown	FPA	flowering time control protein FPA-like [Glycine max]
arahy.2RRL5Q	brown	MED7A	mediator of RNA polymerase II transcription subunit 7
arahy.2S5JQC	brown	rplX	50S ribosomal L24-like protein
arahy.2SQT6H	brown	--	Unknown protein
arahy.2TJ8DU	brown	Zmynd15	zinc finger MYND domain protein
arahy.2U0HVI	brown	At1g06620	2-oxoglutarate (2OG) and Fe(II)-dependent oxygenase superfamily protein
arahy.2U5UH6	brown	--	subtilisin-like serine protease
arahy.2UK2LN	brown	UTR3	UDP-galactose transporter 3
arahy.2V8120	brown	EMF1	protein EMBRYONIC FLOWER 1-like [Glycine max]
arahy.2V8KIQ	brown	mug71	meiotically up-regulated protein 71-like protein
arahy.2W1DSR	brown	DOT2	U4/U6.U5 tri-snRNP-associated protein 1-like isoform X3 [Glycine max]
arahy.2W47TI	brown	RMA1H1	E3 ubiquitin-protein ligase RMA1H1-like isoform X2 [Glycine max]
arahy.2WQF85	brown	PUX8	UBX domain-containing protein
arahy.2X5A1I	brown	CDC48C	cell division control protein 48 homolog C-like isoform X1 [Glycine max]
arahy.2YI87A	brown	WTF1	protein ROOT PRIMORDIUM DEFECTIVE 1-like isoform 1 [Glycine max]
arahy.2Z58NA	brown	BG	basic 7S globulin [Glycine max]
arahy.2ZN6A3	brown	MRS2-2	Mitochondrial inner membrane magnesium transporter mrs2 n=3 Tax=Triticeae RepID=R7W2F3_AEGTA
arahy.303TEV	brown	GTE7	general transcription factor group E6
arahy.30UV9I	brown	--	Essential protein Yae1, N-terminal
arahy.31BYXQ	brown	IAR1	ZIP metal ion transporter family
arahy.31FE81	brown	ptrB	Oligopeptidase B, putative,serine peptidase, clan SC, family S9A-like protein, putative n=5 Tax=Trypanosoma cruzi RepID=K4DWV0_TRYCR
arahy.31U4BG	brown	yxiE	Adenine nucleotide alpha hydrolases-like superfamily protein
arahy.322B5E	brown	PRFB1	Peptide chain release factor 2
arahy.32VGA6	brown	SUN4	Galactose-binding protein
arahy.32YSVZ	brown	DDB_G0284959	Optic atrophy 3 protein (OPA3)
arahy.338AY0	brown	--	CW-type Zinc Finger
arahy.339BKI	brown	--	uncharacterized protein LOC100820179 isoform X2 [Glycine max]
arahy.33IKIL	brown	--	uncharacterized protein LOC100811524 [Glycine max]
arahy.33SUC1	brown	At3g58590	Pentatricopeptide repeat (PPR) superfamily protein
arahy.33TMW6	brown	CDC5	MYB transcription factor MYB65 [Glycine max]
arahy.34G3CR	brown	--	hypothetical protein
arahy.34KTSL	brown	TOC159	translocase of chloroplast 159, chloroplastic-like [Glycine max]
arahy.34Z3BG	brown	--	linker histone H1 and h5 family protein
arahy.35X8AA	brown	4CL1	4-coumarate:CoA ligase 2
arahy.36F1KB	brown	STR1	mercaptopyruvate sulfurtransferase 1
arahy.36FMA1	brown	GST1	glutathione S-transferase tau 5
arahy.36ZQJX	brown	ATXR7	histone-lysine N-methyltransferase SUVR2-like isoform X3 [Glycine max]
arahy.377GQN	brown	BRO1	ALG-2 interacting protein X-like [Glycine max]
arahy.37ZKFY	brown	--	aspartate racemase
arahy.385P84	brown	At1g49180	Protein kinase superfamily protein
arahy.38NIYD	brown	--	unknown protein; FUNCTIONS IN: molecular_function unknown; INVOLVED IN: biological_process unknown; EXPRESSED IN: 24 plant structures; EXPRESSED DURING: 14 growth stages
arahy.38ZPK2	brown	N	disease resistance protein (TIR-NBS-LRR class), putative
arahy.39IB73	brown	PAA2	P-ATPase family transporter: copper ion; heavy metal transporting P-type ATPase-like protein n=1 Tax=Ostreococcus lucimarinus (strain CCE9901) RepID=A4S4X5_OSTLU
arahy.39XWEQ	brown	NUP96	nuclear pore complex protein Nup98-Nup96-like isoform X2 [Glycine max]
arahy.3A06QA	brown	BTS	uncharacterized protein LOC100803002 isoform X1 [Glycine max]
arahy.3AG3I6	brown	PCMP-E27	Pentatricopeptide repeat (PPR) superfamily protein
arahy.3AM325	brown	CPK12	calcium-dependent protein kinase 4
arahy.3B1TBB	brown	ING1	PHD finger protein-related
arahy.3B4RP4	brown	ERDJ3B	DNAJ homologue 3
arahy.3BME1Z	brown	EXO70E2	exocyst subunit exo70 family protein E1
arahy.3CC3ME	brown	--	40S ribosomal protein S11 [Glycine max]
arahy.3DGA3E	brown	--	ARM repeat superfamily protein
arahy.3E0X61	brown	At5g05010	histone-lysine N-methyltransferase SUVR3-like [Glycine max]
arahy.3E1BT5	brown	At3g26670	magnesium transporter NIPA3 isoform X2 [Glycine max]
arahy.3E6AQK	brown	At1g65740	F-box protein
arahy.3EXK4J	brown	GSVIVT00013502001	protein tesmin/TSO1-like CXC 2-like [Glycine max]
arahy.3G7FB6	brown	BIP5	heat shock protein 70
arahy.3GE2A8	brown	rmp	Prefoldin chaperone subunit family protein
arahy.3H2I46	brown	--	uncharacterized protein LOC100804386 isoform X2 [Glycine max]
arahy.3HMZ7U	brown	At4g12770	auxilin-related protein 2-like isoform X2 [Glycine max]
arahy.3HVL5K	brown	EDA30	uncharacterized protein At1g04910-like isoform X2 [Glycine max]
arahy.3I642Y	brown	--	Unknown protein
arahy.3IIQ4T	brown	pyrH	uridylate kinase
arahy.3JQR8Y	brown	--	phosphoglucan, water dikinase, chloroplastic-like isoform X2 [Glycine max]
arahy.3JQT0K	brown	UGT74G1	UDP-glycosyltransferase 74 F1
arahy.3KC6N2	brown	FOLD4	Amino acid dehydrogenase family protein
arahy.3KU04F	brown	SSUH2	chaperone protein dnaJ-related
arahy.3L4KIC	brown	VPS60-1	charged multivesicular body protein
arahy.3LJ0UE	brown	BSL1	Serine/threonine protein phosphatase family protein
arahy.3M9T3M	brown	HMA4	P-ATPase family transporter: copper ion; heavy metal translocating P-type ATPase-like protein n=1 Tax=Ostreococcus lucimarinus (strain CCE9901) RepID=A4RXW6_OSTLU
arahy.3ML67S	brown	SRK2A	serine/threonine-protein kinase SRK2A-like [Glycine max]
arahy.3NY0MJ	brown	Os06g0571400	Translation elongation factor EF1B, gamma chain
arahy.3P0NFT	brown	--	pentatricopeptide (PPR) repeat-containing protein
arahy.3P1HII	brown	CRR21	Pentatricopeptide repeat (PPR) superfamily protein
arahy.3P39BB	brown	--	Unknown protein
arahy.3Q9Y1V	brown	rplX	50S ribosomal L24-like protein
arahy.3QT6IB	brown	ETFA	electron transfer flavoprotein subunit alpha
arahy.3RE0GA	brown	--	uncharacterized protein LOC100785473 isoform X1 [Glycine max]
arahy.3W29E4	brown	VIP6	RNA polymerase-associated protein CTR9 homolog [Glycine max]
arahy.3W7GTE	brown	EBM	mannosylglycoprotein endo-beta-mannosidase-like [Glycine max]
arahy.3X0QME	brown	AFB2	transport inhibitor response 1-like protein-like [Glycine max]
arahy.3X21TC	brown	MORF3	plastid developmental protein DAG, putative
arahy.3X6E38	brown	--	uncharacterized protein At1g10890-like isoform X1 [Glycine max]
arahy.3X8FVR	brown	HIRA	protein HIRA-like isoform X2 [Glycine max]
arahy.3XUX0K	brown	HSK	homoserine kinase
arahy.3YWF5K	brown	--	unknown protein; FUNCTIONS IN: molecular_function unknown; INVOLVED IN: biological_process unknown; LOCATED IN: cellular_component unknown; EXPRESSED IN: 24 plant structures; EXPRESSED DURING: 13 growth stages
arahy.3ZC2I8	brown	At3g46100	histidine-tRNA ligase
arahy.3ZKN46	brown	Os02g0146600	DEAD-box ATP-dependent RNA helicase
arahy.400YCD	brown	RH47	DEAD-box ATP-dependent RNA helicase
arahy.40255N	brown	--	Protein of unknown function (DUF3317)
arahy.40DIQU	brown	FRS4	protein FAR1-RELATED SEQUENCE 4-like isoform X2 [Glycine max]
arahy.4105RR	brown	PSD2	phosphatidylserine decarboxylase 2
arahy.415NE5	brown	SEC15B	exocyst complex component sec15B
arahy.41IR6N	brown	MEE12	TATA box-binding protein associated factor RNA polymerase I subunit B-like protein
arahy.41NV30	brown	FTB	protein farnesyltransferase subunit beta [Glycine max]
arahy.42ETRE	brown	--	Protein of unknown function (DUF155)
arahy.42MKBI	brown	MYB1	myb transcription factor
arahy.42WI7N	brown	AS2	asparagine synthetase 3
arahy.438YJL	brown	HIT4	unknown protein
arahy.439F1X	brown	RABG3F	GTP-binding nuclear Ran-like protein
arahy.44LXWI	brown	LARP6B	RNA-binding protein
arahy.44PPB6	brown	Os05g0571100	protein ROOT PRIMORDIUM DEFECTIVE 1-like isoform 1 [Glycine max]
arahy.45DTJR	brown	At2g27310	F-box family protein
arahy.45FXM1	brown	MOCS3	adenylyltransferase and sulfurtransferase MOCS3-like [Glycine max]
arahy.46MDAV	brown	--	RNA-binding region RNP-1 (RNA recognition motif); Pyridoxal-dependent decarboxylase n=1 Tax=Medicago truncatula RepID=A2Q361_MEDTR
arahy.46SNUH	brown	BSL3	Serine/threonine protein phosphatase family protein
arahy.46XP1L	brown	NPGR2	tetratricopeptide repeat protein 7A-like isoform X1 [Glycine max]
arahy.470EJV	brown	BZIP17	TGACG-sequence-specific DNA-binding protein TGA-1B n=1 Tax=Morus notabilis RepID=W9SF09_9ROSA
arahy.47454T	brown	NOA1	aquaporin TIP2-1 [Glycine max]
arahy.489DAS	brown	HXK2	hexokinase 3
arahy.48LUDE	brown	SPCC1827.05c	RNA-binding (RRM/RBD/RNP motifs) family protein
arahy.48QDBJ	brown	SDF2	stromal cell-derived factor-like protein
arahy.490PMA	brown	HAK5	Potassium transporter family protein
arahy.491WUZ	brown	At3g06240	F-box protein interaction domain protein
arahy.496WES	brown	SYP52	syntaxin of plants 51
arahy.49JIZL	brown	PEX14	peroxisomal membrane protein PEX14-like isoform X1 [Glycine max]
arahy.49LPE6	brown	CSLA2	glucomannan 4-beta-mannosyltransferase 2-like [Glycine max]
arahy.49LU7U	brown	--	Unknown protein
arahy.4A36F8	brown	E4	Peptide methionine sulfoxide reductase family protein
arahy.4C5FXK	brown	CLPP5	ATP-dependent Clp protease proteolytic protein
arahy.4C6K6Y	brown	ESMD1	uncharacterized protein At1g04910-like isoform X2 [Glycine max]
arahy.4CVW1F	brown	--	growth inhibition and differentiation-like protein, putative
arahy.4DFA8P	brown	PAP7	Plastid-lipid associated protein PAP / fibrillin family protein
arahy.4DR6J6	brown	At3g56470	F-box family protein
arahy.4EVV01	brown	NRT2.5	high affinity nitrate transporter 2.6
arahy.4FD105	brown	KAKU4	dentin sialophosphoprotein-like isoform X3 [Glycine max]
arahy.4FT00Z	brown	SGT1	protein SGT1 homolog isoform X2 [Glycine max]
arahy.4G0IWV	brown	EIN2	Divalent metal cation transporter MntH n=3 Tax=Paenibacillus RepID=W4B5U5_9BACL
arahy.4HF9FM	brown	--	uncharacterized protein LOC102669880 [Glycine max]
arahy.4I2956	brown	--	unknown protein
arahy.4IDT5U	brown	--	Unknown protein
arahy.4IT8LW	brown	TBL7	protein YLS7-like [Glycine max]
arahy.4J87YY	brown	--	Unknown protein
arahy.4JG1SZ	brown	BAG5	BAG family molecular chaperone regulator 5
arahy.4LB3M6	brown	SCL30A	serine/arginine-rich splicing factor 33-like isoform X2 [Glycine max]
arahy.4M6RGX	brown	BHLH121	transcription factor
arahy.4M845G	brown	SUV3	ATP-dependent RNA helicase, mitochondrial, putative
arahy.4N5DEN	brown	PP2AB2	Serine/threonine-protein phosphatase 2A 55 kDa regulatory subunit B n=3 Tax=Oryza RepID=J3L1L9_ORYBR
arahy.4NT8ND	brown	SIS8	Pentatricopeptide repeat (PPR) superfamily protein
arahy.4PM453	brown	mon2	protein MON2 homolog isoform X2 [Glycine max]
arahy.4PU0PP	brown	PAS2A	Protein-tyrosine phosphatase-like, PTPLA
arahy.4RH2HB	brown	At3g01300	Protein kinase superfamily protein
arahy.4RN93K	brown	PCMP-H21	Pentatricopeptide repeat (PPR) superfamily protein
arahy.4S1ZVA	brown	--	RRP12-like protein
arahy.4SH7KV	brown	BRG3	SBP (S-ribonuclease binding protein) family protein
arahy.4SQ8M9	brown	At5g47720	probable acetyl-CoA acetyltransferase, cytosolic 2 isoform X2 [Glycine max]
arahy.4SU7B4	brown	PUB62	U-box domain-containing protein 62-like isoform X1 [Glycine max]
arahy.4SUD33	brown	METTL13	S-adenosylmethionine-dependent methyltransferase, putative
arahy.4T2FL2	brown	infB	Translation initiation factor 2, small GTP-binding protein
arahy.4TB0JC	brown	ANKRD13B	Ankyrin repeat family protein
arahy.4UH9TR	brown	MBR2	RING finger protein 38-like isoform X2 [Glycine max]
arahy.4WTK5H	brown	RNH1	protein NLRC3-like [Glycine max]
arahy.4X43I0	brown	PRIM1	DNA primase n=3 Tax=Citrus RepID=V4SXG4_9ROSI
arahy.4XS3FZ	brown	ERF1A	ethylene-responsive transcription factor 1A-like [Glycine max]
arahy.5026CX	brown	EMB506	Ankyrin repeat family protein
arahy.5041YP	brown	WRKY32	WRKY family transcription factor family protein
arahy.50GAHB	brown	At5g13110	glucose-6-phosphate dehydrogenase 2
arahy.50IW82	brown	Brap	zinc finger (C3HC4-type RING finger) family protein
arahy.50JBL9	brown	--	NHL repeat protein
arahy.50MGD9	brown	--	Haloacid dehalogenase-like hydrolase, putative n=1 Tax=Synechococcus sp. PCC 7335 RepID=B4WLE0_9SYNE
arahy.50NG3N	brown	SLY1	SEC1 family transport protein SLY1-like [Glycine max]
arahy.50RG73	brown	qtrt1	queuine tRNA-ribosyltransferase
arahy.50S1PH	brown	--	myb family transcription factor
arahy.50YMIU	brown	SYP22	syntaxin, putative
arahy.519MSC	brown	--	Unknown protein
arahy.51DSAI	brown	At3g11320	probable sugar phosphate/phosphate translocator [Glycine max]
arahy.51XV3I	brown	MEFG2	elongation factor Tu GTP-binding domain protein
arahy.522STQ	brown	CWC26	unknown protein; FUNCTIONS IN: molecular_function unknown; INVOLVED IN: biological_process unknown; LOCATED IN: cytosol, nucleus; EXPRESSED IN: 25 plant structures; EXPRESSED DURING: 15 growth stages
arahy.52IM1F	brown	MED4	mediator of RNA polymerase II transcription subunit 4-like isoform X9 [Glycine max]
arahy.52PG7K	brown	YLMG1-1	YGGT family protein
arahy.52XSZL	brown	LARP1B	la-related protein-like isoform X1 [Glycine max]
arahy.536D4K	brown	OBGL	GTP-binding protein DLObg1-2 n=2 Tax=Dimocarpus longan RepID=G4XPB6_9ROSI
arahy.549KLR	brown	EDM2	uncharacterized protein LOC100810533 isoform X3 [Glycine max]
arahy.54PB3V	brown	--	down syndrome critical region protein, putative
arahy.55LQUQ	brown	APO3	APO RNA-binding protein
arahy.568RE3	brown	coq9	ubiquinone biosynthesis protein COQ9
arahy.56JAE5	brown	FK	sterol C-14 reductase
arahy.56Q8GI	brown	--	Unknown protein
arahy.57RHWF	brown	E4	Peptide methionine sulfoxide reductase family protein
arahy.581AXD	brown	PPP6R3	SIT4 phosphatase-associated family protein
arahy.586MWM	brown	--	UPF0415 protein C7orf25 homolog isoform X2 [Glycine max]
arahy.58QJX0	brown	VOZ1	transcription factor VOZ1-like isoform X2 [Glycine max]
arahy.5906V7	brown	RPD1	protein ROOT PRIMORDIUM DEFECTIVE 1-like isoform X2 [Glycine max]
arahy.598RU2	brown	HAG3	histone acetyltransferase
arahy.59CN8W	brown	impdh	inosine-5'-monophosphate dehydrogenase
arahy.59QZXR	brown	NAP1	Nck-associated-like protein
arahy.59ZZV8	brown	RDM16	U4/U6 small nuclear ribonucleoprotein Prp3-like isoform X3 [Glycine max]
arahy.5A5R3G	brown	PRFB1	Peptide chain release factor 2
arahy.5B2GYG	brown	ATG18C	autophagy-related protein 18b isoform X2 [Glycine max]
arahy.5B6WJ4	brown	PLGG1	membrane protein, putative
arahy.5BMW9B	brown	At1g03100	Pentatricopeptide repeat (PPR) superfamily protein
arahy.5BR3PR	brown	COIL	DNA ligase 1-like isoform X2 [Glycine max]
arahy.5C07ZC	brown	TOM3	tobamovirus multiplication protein 3
arahy.5CX2AU	brown	ARID3	AT-rich interactive domain-containing protein 3-like isoform X2 [Glycine max]
arahy.5D1JVS	brown	DLD	D-lactate dehydrogenase (cytochrome)
arahy.5D60HD	brown	RBPMS	RNA-binding protein mde7-like [Glycine max]
arahy.5DH5NX	brown	--	NBS-LRR disease resistance protein
arahy.5DT4KX	brown	PCMP-E54	Pentatricopeptide repeat (PPR) superfamily protein
arahy.5E2E13	brown	CAF1-9	probable CCR4-associated factor 1 homolog 11-like [Glycine max]
arahy.5E2VRE	brown	--	Unknown protein
arahy.5EJH8A	brown	ALY3	protein ALWAYS EARLY 3-like isoform X1 [Glycine max]
arahy.5F2ED3	brown	HPTG1	probable beta-1,3-galactosyltransferase 11-like isoform X1 [Glycine max]
arahy.5F6SWA	brown	--	DUF3727 family protein
arahy.5FT6EN	brown	UBP13	ubiquitin carboxyl-terminal hydrolase-like protein
arahy.5FW2L6	brown	rbm48	RNA-binding protein 48 isoform X3 [Glycine max]
arahy.5G19JE	brown	EDR2	uncharacterized protein LOC100791517 isoform X2 [Glycine max]
arahy.5G499W	brown	--	uncharacterized protein LOC100791001 isoform X4 [Glycine max]
arahy.5G8A8Q	brown	At4g31240	probable nucleoredoxin 3-like isoform X2 [Glycine max]
arahy.5GG3L5	brown	--	arginine/serine-rich splicing factor
arahy.5H9H8Z	brown	RAP74	transcription initiation factor IIF subunit alpha
arahy.5IPV2R	brown	SRP-54C	Signal recognition particle, SRP54 subunit protein
arahy.5IVJ41	brown	--	protein SDE2 homolog [Glycine max]
arahy.5JEW3L	brown	At4g16800	ATP-dependent caseinolytic (Clp) protease/crotonase family protein
arahy.5JT16E	brown	At5g41620	uncharacterized protein At5g41620-like [Glycine max]
arahy.5K1Z4H	brown	PPIE	peptidyl-prolyl cis-trans isomerase E-like protein
arahy.5KC586	brown	NORK	protein kinase family protein
arahy.5KI8FH	brown	DREB2C	ethylene-responsive transcription factor 13-like [Glycine max]
arahy.5LCH1K	brown	DNAJC8	Chaperone DnaJ-domain superfamily protein
arahy.5LH2SM	brown	--	kelch-like protein 18-like [Glycine max]
arahy.5LNY8Z	brown	--	uncharacterized protein LOC100806576 isoform X1 [Glycine max]
arahy.5MFX44	brown	prfA	Peptide chain release factor 1
arahy.5N4DPF	brown	At5g64460	Phosphoglycerate mutase family protein
arahy.5NE8AH	brown	Cnot1	CCR4-NOT transcription complex subunit 1-like isoform X1 [Glycine max]
arahy.5NG4EY	brown	VTE4	gamma-tocopherol methyltransferase
arahy.5NN59P	brown	PXN	mitochondrial substrate carrier family protein B-like [Glycine max]
arahy.5NY27E	brown	ATL48	HIG1 domain family, member 2A n=9 Tax=Cetartiodactyla RepID=Q05AT5_BOVIN
arahy.5PC8HY	brown	At3g03980	short-chain dehydrogenase-reductase B
arahy.5R81VU	brown	PCMP-H23	Pentatricopeptide repeat (PPR) superfamily protein
arahy.5SJ4SU	brown	sen1	P-loop containing nucleoside triphosphate hydrolases superfamily protein
arahy.5SQR1F	brown	Os01g0833700	histone-lysine N-methyltransferase SUVR3-like [Glycine max]
arahy.5T6AGB	brown	ING1	PHD finger protein-related
arahy.5TP18E	brown	trappc13	trafficking protein particle complex subunit 13-like isoform X1 [Glycine max]
arahy.5TU0IR	brown	--	uncharacterized protein LOC100803123 isoform X4 [Glycine max]
arahy.5TUK4V	brown	GINS2	DNA replication complex GINS protein PSF2 isoform X3 [Glycine max]
arahy.5U1GCZ	brown	Os04g0656100	plasma membrane H+-ATPase
arahy.5U4ES3	brown	At2g44660	probable dolichyl pyrophosphate Glc1Man9GlcNAc2 alpha-1,3-glucosyltransferase [Glycine max]
arahy.5UMV3I	brown	--	unknown protein; Has 52 Blast hits to 46 proteins in 20 species: Archae - 0; Bacteria - 0; Metazoa - 0; Fungi - 0; Plants - 45; Viruses - 0; Other Eukaryotes - 7 (source: NCBI BLink).
arahy.5V1RNQ	brown	MAP1B	methionine aminopeptidase 1B
arahy.5V52A0	brown	prmA	ribosomal protein L11 methyltransferase-related
arahy.5VG832	brown	OBE4	protein OBERON 3-like isoform X1 [Glycine max]
arahy.5W0L45	brown	PUX1	tether containing UBX domain for GLUT4-like protein
arahy.5WJ9LU	brown	CBSPPR1	Pentatricopeptide repeat (PPR-like) superfamily protein
arahy.5WW9LS	brown	XERICO	E3 ubiquitin-protein ligase [Glycine max]
arahy.5X1G5N	brown	--	Pentatricopeptide repeat (PPR) superfamily protein
arahy.5Z6Y8Z	brown	GLO1	peroxisomal (S)-2-hydroxy-acid oxidase GLO1
arahy.5ZLV04	brown	CYP710A11	cytochrome P450, family 710, subfamily A, polypeptide 1
arahy.5ZRL6J	brown	AGD4	ADP-ribosylation factor GTPase-activating protein AGD3-like [Glycine max]
arahy.5ZVC70	brown	--	putative nuclease HARBI1-like [Glycine max]
arahy.5ZZ6F4	brown	cbll1	E3 ubiquitin-protein ligase Hakai-like isoform X1 [Glycine max]
arahy.60JIWJ	brown	MEFG1	elongation factor Tu GTP-binding domain protein
arahy.60NX6Q	brown	ATR	Serine/Threonine-kinase ATR-like protein
arahy.60VEZT	brown	At3g53170	Pentatricopeptide repeat (PPR) superfamily protein
arahy.61109J	brown	--	uncharacterized protein LOC100791744 [Glycine max]
arahy.614TBX	brown	--	Unknown protein
arahy.61N80Q	brown	DOT2	U4/U6.U5 tri-snRNP-associated protein 1-like isoform X3 [Glycine max]
arahy.62512W	brown	At1g05600	Pentatricopeptide repeat (PPR) superfamily protein
arahy.62L32R	brown	CID3	PAB1-binding protein 1-like isoform X4 [Glycine max]
arahy.6345FV	brown	HSA32	(2R)-phospho-3-sulfolactate synthase ComA
arahy.649KNP	brown	ETO1	ETO1-like protein 1-like isoform X1 [Glycine max]
arahy.64AR13	brown	UEV1D	Ubiquitin-conjugating enzyme family protein
arahy.64PL1T	brown	PCMP-H41	pentatricopeptide (PPR) repeat-containing protein
arahy.653B24	brown	--	heparan-alpha-glucosaminide N-acetyltransferase-like protein
arahy.65FP0T	brown	--	Unknown protein
arahy.664CMB	brown	--	HR-like lesion-inducing protein-related
arahy.66CLCN	brown	MTN1	methylthioadenosine nucleosidase 1
arahy.66EI83	brown	yipf5	Integral membrane Yip1 family protein
arahy.66HFQJ	brown	IMPA1	importin subunit alpha-1b
arahy.66V1NK	brown	At1g06270	Pentatricopeptide repeat (PPR) superfamily protein
arahy.674JY7	brown	--	myb-like DNA-binding domain, shaqkyf class protein
arahy.67HPDN	brown	COR2	aldo/keto reductase family oxidoreductase
arahy.67VJX2	brown	BRD4	bromodomain-containing protein 4B-like isoform X2 [Glycine max]
arahy.681ID1	brown	POT1B	DNA binding protein n=2 Tax=Arabidopsis lyrata RepID=D7L8N0_ARALL
arahy.68E5M7	brown	At1g55090	glutamine-dependent NAD(+) synthetase, putative
arahy.68ECIB	brown	BI-1	BAX inhibitor 1
arahy.68LYJE	brown	SEI2	Putative adipose-regulatory protein (Seipin)
arahy.68M1NE	brown	CNX1	Calcium-binding protein cnx1 n=1 Tax=Ophiostoma piceae (strain UAMH 11346) RepID=S3BU07_OPHP1
arahy.68MQ8I	brown	HCAR	coenzyme F420 hydrogenase family / dehydrogenase, beta subunit family
arahy.68UH5I	brown	UBA1	ubiquitin activating enzyme 2
arahy.68WXI5	brown	--	holocarboxylase synthetase
arahy.68Y0RY	brown	PRFB3	peptide chain release factor, putative
arahy.69B3L2	brown	ARR1	two-component response regulator ARR2-like [Glycine max]
arahy.69M8FP	brown	prfA	Peptide chain release factor 1
arahy.69Z0CE	brown	--	uncharacterized protein LOC100804726 isoform X2 [Glycine max]
arahy.6A93C1	brown	CBSDUF1	DUF21 domain plant protein
arahy.6AWP8P	brown	SMU1	WD40 repeat-containing protein SMU1-like [Glycine max]
arahy.6B1VGR	brown	NUP85	Nup85 nucleoporin protein
arahy.6BE69P	brown	SKIP14	F-box protein SKIP14-like [Glycine max]
arahy.6BP8PA	brown	RTNLB11	Reticulon family protein
arahy.6BXT91	brown	ING2	PHD finger protein-related
arahy.6CH5L4	brown	--	phosphatidylinositol-glycan biosynthesis class X protein-like [Glycine max]
arahy.6CSL00	brown	--	uncharacterized protein LOC100795224 [Glycine max]
arahy.6DX332	brown	JMJ30	2-oxoglutarate (2OG) and Fe(II)-dependent oxygenase superfamily protein
arahy.6E4I8R	brown	PUX7	UBX domain-containing protein
arahy.6E9CRB	brown	PCFS4	uncharacterized protein LOC100811629 isoform X1 [Glycine max]
arahy.6ER1M6	brown	RGA2	LRR and NB-ARC domain disease resistance protein
arahy.6FZ3DA	brown	BGAL7	beta-galactosidase 15
arahy.6G9Z4M	brown	SFR2	beta glucosidase 40
arahy.6H6H67	brown	At3g48880	F-box/LRR protein
arahy.6I3KXF	brown	RNF43	RING-H2 finger protein [Glycine max]
arahy.6J361A	brown	MED21	mediator of RNA polymerase II transcription subunit 21
arahy.6JB3CU	brown	URT1	Likely PAP/25A associated domain containing protein/Poly(A) RNA polymerase cid11 n=1 Tax=Blumeria graminis f. sp. hordei (strain DH14) RepID=N1JI17_BLUG1
arahy.6JHV2K	brown	CHI1B1	chalcone-flavanone isomerase family protein
arahy.6K70BV	brown	YLS3	Bifunctional inhibitor/lipid-transfer protein/seed storage 2S albumin superfamily protein
arahy.6KTC2K	brown	DGD1	digalactosyldiacylglycerol synthase 1, chloroplastic-like [Glycine max]
arahy.6KUP6V	brown	CLPR2	CLP protease proteolytic subunit 2
arahy.6L1LF5	brown	FHA2	SMAD/FHA domain-containing protein
arahy.6N96FM	brown	At1g67480	kelch repeat F-box protein
arahy.6NC3R4	brown	--	nucleic acid binding
arahy.6QHG67	brown	CTR1	Protein kinase superfamily protein
arahy.6QLZ34	brown	SR30	pre-mRNA-splicing factor SF2-like protein
arahy.6QW8CL	brown	CLPR2	CLP protease proteolytic subunit 2
arahy.6S1J49	brown	PIN1	Peptidyl-prolyl cis-trans isomerase, putative n=2 Tax=Ixodes RepID=B7PAM5_IXOSC
arahy.6S1TXT	brown	At4g16580	Protein phosphatase 2C family protein
arahy.6SXA9Y	brown	tmem56c	TRAM, LAG1 and CLN8 (TLC) lipid-sensing domain containing protein
arahy.6TF0DS	brown	At2g28370	Uncharacterised protein family (UPF0497)
arahy.6U5J4T	brown	--	Unknown protein
arahy.6UD7AX	brown	HEN4	RNA-binding KH domain-containing protein
arahy.6UH7HR	brown	TIF3A1	eukaryotic translation initiation factor 3A
arahy.6V868Z	brown	--	hypothetical protein
arahy.6W2W8X	brown	MYBS3	MYB transcription factor MYB93 [Glycine max]
arahy.6W7F9R	brown	FFC	GTP-binding signal recognition particle SRP54, G-domain n=1 Tax=Medicago truncatula RepID=A2Q2E1_MEDTR
arahy.6WJ0DK	brown	MIK2	receptor-like protein kinase 2
arahy.6WYS8R	brown	RH30	DEAD-box ATP-dependent RNA helicase-like protein
arahy.6XZA8Y	brown	PUB4	U-box domain-containing protein 4-like [Glycine max]
arahy.6Y08YU	brown	cwc22	pre-mRNA-splicing factor cwc22, putative
arahy.6YDN9G	brown	NPGR2	tetratricopeptide repeat protein 7A-like isoform X1 [Glycine max]
arahy.6YEN7W	brown	RPI2	ribose-5-phosphate isomerase 2
arahy.6Z8QT9	brown	--	DNA repair-like proteinRadA
arahy.6ZR463	brown	GT-2	trihelix transcription factor GT-2 [Glycine max]
arahy.70CJD0	brown	At5g58730	pfkB-like carbohydrate kinase family protein
arahy.718L0E	brown	PAP27	purple acid phosphatase 27
arahy.71Q3SD	brown	METE	5-methyltetrahydropteroyltriglutamate--homocysteine methyltransferase n=2 Tax=Alcaligenes RepID=M5J2G5_9BURK
arahy.72M3AR	brown	ALMT9	aluminum-activated malate transporter 9
arahy.72M7T5	brown	EML4	Emsy N Terminus (ENT)/ plant Tudor-like domains-containing protein
arahy.72TEPU	brown	--	unknown protein
arahy.72Y1Y4	brown	GLB3	hemoglobin 3
arahy.73CGQ4	brown	--	protein ROOT PRIMORDIUM DEFECTIVE 1-like isoform X6 [Glycine max]
arahy.73PV7W	brown	At2g07140	F-box family protein
arahy.743C1F	brown	--	uncharacterized protein LOC100808320 isoform X1 [Glycine max]
arahy.74V199	brown	AKRP	ankyrin repeat protein
arahy.752ZX1	brown	BHLH106	transcription factor bHLH106-like [Glycine max]
arahy.755JPD	brown	SPX4	SPX domain gene 4
arahy.75KEF6	brown	ECR1	NEDD8-activating enzyme E1 catalytic subunit
arahy.75PF94	brown	--	RNA-binding KH domain-containing protein
arahy.760GHL	brown	DYAD	protein DYAD isoform X3 [Glycine max]
arahy.765Y00	brown	ADG2	Glucose-1-phosphate adenylyltransferase family protein
arahy.7661JY	brown	AG118	acetylornithine aminotransferase
arahy.769PPM	brown	OTP51	Pentatricopeptide repeat (PPR) superfamily protein
arahy.76B0S0	brown	--	Man1-Src1p-carboxy-terminal domain protein
arahy.76C20C	brown	THI1-2	thiamine thiazole synthase 2, chloroplastic-like [Glycine max]
arahy.76MSW2	brown	--	putative pentatricopeptide repeat-containing protein At2g02150-like isoform X8 [Glycine max]
arahy.770S43	brown	IRE1A	protein kinase family protein
arahy.77RLVP	brown	AMP1	glutamate carboxypeptidase, putative
arahy.77T7YG	brown	At5g60570	Galactose oxidase/kelch repeat superfamily protein
arahy.78JRYT	brown	EIF-5A2	eukaryotic translation initiation factor 5A
arahy.78UY2C	brown	Os02g0685600	Protein phosphatase 2C family protein
arahy.78VWZK	brown	CXE12	probable carboxylesterase 12-like [Glycine max]
arahy.792I4R	brown	IVD	isovaleryl-CoA-dehydrogenase
arahy.79CBXL	brown	RH17	DEAD-box ATP-dependent RNA helicase-like protein
arahy.79CRDV	brown	VIT_11s0016g04350	tRNA (guanine(37)-N1)-methyltransferase
arahy.79SUWC	brown	SUMM2	ATP binding; GTP binding; nucleotide binding; nucleoside-triphosphatases
arahy.79TK8E	brown	IWS1	Transcription elongation factor (TFIIS) family protein
arahy.7ARF2K	brown	--	Unknown protein
arahy.7BJ6UQ	brown	At1g10320	splicing factor U2af small subunit A-like isoform X2 [Glycine max]
arahy.7BKG94	brown	AMBRA1	WD repeat-containing protein 5-like [Glycine max]
arahy.7C2XF6	brown	--	Pentatricopeptide repeat (PPR) superfamily protein
arahy.7CUN37	brown	POT3	Potassium transporter family protein
arahy.7EE83P	brown	EML3	Emsy N Terminus (ENT)/ plant Tudor-like domains-containing protein
arahy.7FS7F8	brown	Usp39	Ubiquitin C-terminal hydrolases superfamily protein
arahy.7I5NSS	brown	LFG4	Bax inhibitor-1 family protein
arahy.7I73C9	brown	--	uncharacterized protein LOC102659499 isoform X2 [Glycine max]
arahy.7I89AX	brown	HRD1A	E3 ubiquitin-protein ligase synoviolin-like isoform X1 [Glycine max]
arahy.7IC8PF	brown	MYOB7	uncharacterized protein LOC102665201 isoform X3 [Glycine max]
arahy.7JI950	brown	--	Bifunctional inhibitor/lipid-transfer protein/seed storage 2S albumin superfamily protein
arahy.7L0DWH	brown	HSFA1	heat shock transcription factor A2
arahy.7L9DG2	brown	TAR1-A	senescence-associated protein, putative
arahy.7LH3TR	brown	Os03g0288500	Pseudouridine synthase family protein
arahy.7LSJ26	brown	AMPD	AMP deaminase-like [Glycine max]
arahy.7MK8W0	brown	BEH2	BES1/BZR1 homolog 2
arahy.7NC287	brown	RVE6	MYB transcription factor MYB118 isoform X1 [Glycine max]
arahy.7PDR7X	brown	At3g23880	F-box family protein
arahy.7QE80G	brown	SLP1	Calcineurin-like metallo-phosphoesterase superfamily protein
arahy.7QG3JR	brown	3AT1	anthocyanin 5-aromatic acyltransferase-like [Glycine max]
arahy.7QGM13	brown	KHSRP	RNA-binding KH domain-containing protein
arahy.7R7ZTH	brown	At1g71210	Pentatricopeptide repeat (PPR) superfamily protein
arahy.7RGD68	brown	--	uncharacterized protein LOC100796218 isoform X2 [Glycine max]
arahy.7RJ7GD	brown	cwf19l2	CWF19-like protein 2-like isoform X2 [Glycine max]
arahy.7RX9RF	brown	At5g22090	protein FAF-like, chloroplastic-like [Glycine max]
arahy.7S1CUY	brown	cwc22	pre-mRNA-splicing factor cwc22, putative
arahy.7S5TTX	brown	--	uncharacterized protein LOC100777508 isoform X1 [Glycine max]
arahy.7SF3LE	brown	SAP7	zinc finger A20 and AN1 domain stress-associated protein
arahy.7T6UUP	brown	SCPL50	serine carboxypeptidase-like 50
arahy.7TC8PB	brown	ngdn-b	neuroguidin-like isoform X3 [Glycine max]
arahy.7TIF1A	brown	Tkfc	Dihydroxyacetone kinase
arahy.7U3W9V	brown	--	uncharacterized protein LOC100527040 isoform X4 [Glycine max]
arahy.7UDZ1N	brown	Zmat2	zinc finger matrin type 2
arahy.7UXB07	brown	TPP2	tripeptidyl peptidase ii
arahy.7W7N8S	brown	--	cyclin-D-binding Myb-like transcription factor-like protein
arahy.7WP6A4	brown	--	uncharacterized protein LOC102668538 [Glycine max]
arahy.7X1NZD	brown	TSJT1	stem-specific protein TSJT1-like [Glycine max]
arahy.7X2355	brown	SPAC3A12.04c	Ribonuclease P protein subunit p30 n=1 Tax=Medicago truncatula RepID=G7IU96_MEDTR
arahy.7ZHB4F	brown	--	Transducin/WD40 repeat-like superfamily protein
arahy.8009T9	brown	PCR10	protein PLANT CADMIUM RESISTANCE 10-like isoform X2 [Glycine max]
arahy.81QCRK	brown	WAV3	Zinc finger (C3HC4-type RING finger) family protein
arahy.81W4VQ	brown	AAE1	acyl-CoA synthetase 5
arahy.81WHQ4	brown	RTNLB11	Reticulon family protein
arahy.826T7K	brown	--	isoprenylcysteine carboxyl methyltransferase
arahy.83D75L	brown	PRA1A1	prenylated RAB acceptor 1.A1
arahy.83HUSC	brown	ASHH1	histone-lysine N-methyltransferase SUVR2-like isoform X3 [Glycine max]
arahy.842B2E	brown	YPQ1	PQ-loop repeat family protein / transmembrane family protein
arahy.84FHQN	brown	Itsn1	Calcium-binding EF hand family protein
arahy.84NU8G	brown	AAH2	allantoate amidohydrolase
arahy.84ZR2Z	brown	--	RNA binding methyltransferase FtsJ like n=1 Tax=Halanaerobium saccharolyticum subsp. saccharolyticum DSM 6643 RepID=M5EE15_9FIRM
arahy.84ZZZT	brown	GC6	Isoform 2 of General vesicular transport factor p115 n=2 Tax=Rodentia RepID=Q9Z1Z0-2
arahy.85LDPV	brown	SDF2	stromal cell-derived factor-like protein
arahy.85R7J6	brown	At1g12760	RING-H2 finger protein 2B
arahy.85V0ID	brown	--	uncharacterized protein LOC100813375 [Glycine max]
arahy.863Y68	brown	CID12	polyadenylate-binding protein 8 isoform X1 [Glycine max]
arahy.86BA7N	brown	gdh	glutamate dehydrogenase 2
arahy.87EYQC	brown	At1g10310	Oxidoreductase, short chain dehydrogenase/reductase family n=1 Tax=Coleofasciculus chthonoplastes PCC 7420 RepID=B4VLF9_9CYAN
arahy.880YTL	brown	BZIP23	bZIP transcription factor bZIP122 isoform X7 [Glycine max]
arahy.88153A	brown	prmA	ribosomal protein L11 methyltransferase-related
arahy.8827VP	brown	OsI_35105	Pyruvate kinase family protein
arahy.88C8QI	brown	eif2b2	translation initiation factor eIF-2B subunit beta [Glycine max]
arahy.88XX4I	brown	PSRP1	30S ribosomal protein, putative
arahy.88Y1ZI	brown	HRD1A	E3 ubiquitin-protein ligase synoviolin-like isoform X1 [Glycine max]
arahy.89FNHL	brown	At4g34730	ribosome-binding factor A family protein
arahy.89SBZN	brown	CCT2	choline-phosphate cytidylyltransferase
arahy.8A2QUP	brown	AHK3	histidine kinase 3
arahy.8A3W3K	brown	NMAT4	RNA-directed DNA polymerase (reverse transcriptase)
arahy.8C5G5Z	brown	--	CAAX amino terminal protease family protein
arahy.8CP0UI	brown	ALDH2B7	aldehyde dehydrogenase family 2 member C4-like [Glycine max]
arahy.8D109F	brown	NAC017	NAC domain protein,
arahy.8F2DT0	brown	CDC48	cell division cycle protein 48 homolog [Glycine max]
arahy.8FQY9T	brown	--	Haloacid dehalogenase-like hydrolase, putative n=1 Tax=Synechococcus sp. PCC 7335 RepID=B4WLE0_9SYNE
arahy.8GH2US	brown	HCAR	coenzyme F420 hydrogenase family / dehydrogenase, beta subunit family
arahy.8HB0N1	brown	--	COX assembly mitochondrial protein 2 homolog isoform X2 [Glycine max]
arahy.8HL8AF	brown	RGGA	Hyaluronan / mRNA binding family
arahy.8I0KNX	brown	LRK10L-1.2	probable receptor-like protein kinase At1g67000-like isoform X1 [Glycine max]
arahy.8JQ024	brown	UBP13	ubiquitin carboxyl-terminal hydrolase-like protein
arahy.8KJ0MH	brown	--	DUF3727 family protein
arahy.8KS8EB	brown	--	alpha/beta fold hydrolase
arahy.8L6PVU	brown	CDC5	cell division cycle 5-like protein-like isoform X2 [Glycine max]
arahy.8LKN4P	brown	SINAT4	ubiquitin ligase SINAT3
arahy.8N3EDT	brown	--	unknown protein; Has 640 Blast hits to 638 proteins in 201 species: Archae - 0; Bacteria - 293; Metazoa - 0; Fungi - 71; Plants - 72; Viruses - 0; Other Eukaryotes - 204 (source: NCBI BLink).
arahy.8NC760	brown	At5g03905	iron-sulfur cluster assembly protein IscA
arahy.8P3ZQ3	brown	WIT1	WPP domain-interacting tail-anchored protein 1-like isoform X2 [Glycine max]
arahy.8Q202K	brown	--	micronuclear linker histone polyprotein-like [Glycine max]
arahy.8SN94U	brown	MFL1	mitochondrial substrate carrier family protein C-like [Glycine max]
arahy.8SWZ13	brown	SHI	protein SHI RELATED SEQUENCE 1-like [Glycine max]
arahy.8U6WSJ	brown	LIP1	RAB GTPase homolog 7A
arahy.8U8ZZM	brown	PEX7	WD repeat-containing protein 44-like isoform X2 [Glycine max]
arahy.8UN9ME	brown	ATX1	histone-lysine N-methyltransferase SUVR2-like isoform X2 [Glycine max]
arahy.8VS1VF	brown	NCBP	eukaryotic translation initiation factor 4E
arahy.8W0EBA	brown	ACER	alkaline phytoceramidase
arahy.8W2D3B	brown	IDD7	zinc finger protein MAGPIE-like [Glycine max]
arahy.8W4KMR	brown	At5g27470	seryl-tRNA synthetase / serine--tRNA ligase
arahy.8W5IUP	brown	GLCAT14A	Core-2/I-branching beta-1,6-N-acetylglucosaminyltransferase family protein
arahy.8W8L97	brown	At5g64500	Major facilitator superfamily protein
arahy.8W9CKH	brown	--	unknown protein; Has 48 Blast hits to 48 proteins in 21 species: Archae - 0; Bacteria - 0; Metazoa - 0; Fungi - 0; Plants - 40; Viruses - 0; Other Eukaryotes - 8 (source: NCBI BLink).
arahy.8X014Y	brown	TPR1	protein TOPLESS-like isoform X2 [Glycine max]
arahy.8X0TS3	brown	--	Ribonucleases P/MRP protein subunit POP1-like n=3 Tax=Arabidopsis RepID=F4IL30_ARATH
arahy.8XPX7R	brown	NFYB2	nuclear transcription factor Y subunit B-2 [Glycine max]
arahy.8XU14N	brown	--	uncharacterized protein DDB_G0271670-like [Glycine max]
arahy.8Y06GW	brown	--	unknown protein
arahy.8YHQ6Y	brown	DRIP2	E3 ubiquitin protein ligase DRIP2-like [Glycine max]
arahy.8Z2PYB	brown	APO2	homeobox-leucine zipper protein ANTHOCYANINLESS 2-like isoform X2 [Glycine max]
arahy.8ZHK7B	brown	UTR6	Nucleotide-sugar transporter/ sugar porter n=3 Tax=Zea mays RepID=B6UBN6_MAIZE
arahy.8ZID0Q	brown	PCMP-E47	Pentatricopeptide repeat (PPR) superfamily protein
arahy.900JYR	brown	rpl22	50S ribosomal protein L22, chloroplastic [Glycine max]
arahy.906M7D	brown	--	putative nuclease HARBI1-like [Glycine max]
arahy.908IX6	brown	RPS4B	disease resistance protein (TIR-NBS-LRR class), putative
arahy.914CGH	brown	CS1	chorismate synthase
arahy.91ARJF	brown	At4g18375	RNA-binding KH domain-containing protein
arahy.91FELD	brown	APEM9	3-phosphoinositide-dependent protein kinase-1, putative
arahy.92109M	brown	NRPA2	DNA-directed RNA polymerase family protein
arahy.92FQ09	brown	--	uncharacterized protein LOC100499972 isoform X6 [Glycine max]
arahy.93YPU9	brown	At2g32000	DNA topoisomerase I
arahy.9489MQ	brown	--	Pentatricopeptide repeat (PPR) superfamily protein
arahy.95J0BI	brown	Sec23ip	Sterile alpha motif (SAM) domain-containing protein
arahy.95QFDX	brown	EIF4A3A	DEAD-box ATP-dependent RNA helicase
arahy.95XRJP	brown	NOP12	RNA-binding (RRM/RBD/RNP motifs) family protein
arahy.96LNJW	brown	--	Unknown protein
arahy.96RWGK	brown	PEX4	ubiquitin conjugating enzyme 9
arahy.96WKUG	brown	IDH5	isocitrate dehydrogenase V
arahy.97EUYU	brown	--	Unknown protein
arahy.97GSLL	brown	GALT6	probable beta-1,3-galactosyltransferase 19-like [Glycine max]
arahy.97VU5P	brown	TOM2A	tobamovirus multiplication protein 2A-like [Glycine max]
arahy.97ZL4S	brown	JMJ14	probable lysine-specific demethylase JMJ14-like isoform X1 [Glycine max]
arahy.9899SL	brown	SCC4	MAU2 chromatid cohesion factor homolog [Glycine max]
arahy.98L393	brown	GAUT14	probable galacturonosyltransferase 14-like [Glycine max]
arahy.99AA0S	brown	TAF15B	RNA recognition motif (RRM) superfamily protein
arahy.99LF57	brown	--	Pentatricopeptide repeat (PPR) superfamily protein
arahy.9AQU5H	brown	ILP1	GC-rich sequence DNA-binding factor-like protein
arahy.9AZF4D	brown	Syncrip	RNA-binding protein 38-like isoform X1 [Glycine max]
arahy.9DH571	brown	--	Unknown protein
arahy.9FBM9V	brown	FIP37	FKBP12-interacting protein of 37 kDa-like isoform X1 [Glycine max]
arahy.9HLH7R	brown	HD16	casein kinase 1
arahy.9I9TCZ	brown	--	Unknown protein
arahy.9IJI7K	brown	OST1B	dolichyl-diphosphooligosaccharide--protein glycosyltransferase subunit 1B-like [Glycine max]
arahy.9IV7G6	brown	GDCSP	Glycine dehydrogenase decarboxylating protein n=3 Tax=Rosaceae RepID=W8SQT8_9ROSA
arahy.9JB77L	brown	--	Transducin/WD40 repeat-like superfamily protein
arahy.9JS9NA	brown	At3g52670	F-box/RNI-like superfamily protein
arahy.9LZ6WQ	brown	N	disease resistance protein (TIR-NBS-LRR class), putative
arahy.9M8SYH	brown	RRP6L2	exosome component 10-like isoform X1 [Glycine max]
arahy.9MW0DX	brown	At2g36330	Uncharacterised protein family (UPF0497)
arahy.9N5T6G	brown	rpmG	Ribosomal protein L33 family protein
arahy.9NFN0F	brown	NEK5	Protein kinase superfamily protein
arahy.9PA5H9	brown	--	ureidoglycolate hydrolase, putative
arahy.9PR62B	brown	CPRF2	bZIP transcription factor family protein
arahy.9QV869	brown	PABN3	polyadenylate-binding protein 1
arahy.9RDP1W	brown	--	Sec14p-like phosphatidylinositol transfer family protein
arahy.9RR6WG	brown	At3g20280	PHD-finger protein
arahy.9RT6YB	brown	--	Mitochondrial import inner membrane translocase subunit Tim17/Tim22/Tim23 family protein
arahy.9TA9MT	brown	RPP13	disease resistance protein
arahy.9TCE4B	brown	At1g70590	Sel1 repeat protein
arahy.9TZZ10	brown	PCMP-E90	Pentatricopeptide repeat (PPR) superfamily protein
arahy.9U3PF1	brown	MED22B	mediator of RNA polymerase II transcription subunit 22
arahy.9U8ZL6	brown	--	ankyrin repeat-containing protein At5g02620-like isoform X3 [Glycine max]
arahy.9UNY9A	brown	BUB1	Ca2+regulated serine-threonine protein kinase family protein
arahy.9UP1GZ	brown	IRE1A	protein kinase family protein
arahy.9V15EM	brown	FAHD1	Fumarylacetoacetate (FAA) hydrolase family
arahy.9VNC38	brown	--	uncharacterized protein LOC100781730 isoform X3 [Glycine max]
arahy.9WLF5R	brown	KEU	SNARE-interacting protein KEULE-like isoform X1 [Glycine max]
arahy.9WPU3R	brown	JJJ1	Transcription factor with zinc finger DNA-binding motif, putative n=1 Tax=Candida maltosa (strain Xu316) RepID=M3K036_CANMX
arahy.9WS90R	brown	VSR1	vacuolar sorting receptor homolog 1
arahy.9WV3XJ	brown	SRP72	signal recognition particle subunit SRP72-like [Glycine max]
arahy.9XXT64	brown	--	Unknown protein
arahy.9Y6HC5	brown	SECA2	Preprotein translocase SecA family protein
arahy.9ZQ2A8	brown	VPS26B	vacuolar protein sorting 26B
arahy.A02MA9	brown	AGD12	ADP-ribosylation factor GTPase-activating protein AGD12-like [Glycine max]
arahy.A0K4XE	brown	tmem135	Mitochondrial import inner membrane translocase subunit Tim17/Tim22/Tim23 family protein
arahy.A0NJYH	brown	--	uncharacterized protein LOC100776360 isoform X3 [Glycine max]
arahy.A0TJ2P	brown	EDS1	enhanced disease susceptibility protein
arahy.A1W3C7	brown	RHON1	Rho termination factor
arahy.A1ZBG7	brown	TYW1	tRNA wybutosine-synthesizing protein 1 homolog [Glycine max]
arahy.A2CAGE	brown	--	Unknown protein
arahy.A31QB2	brown	--	myb-like DNA-binding domain, shaqkyf class protein
arahy.A3A4LS	brown	POL2A	Pentatricopeptide repeat (PPR) superfamily protein
arahy.A41SUW	brown	SDR1	NAD(P)-binding Rossmann-fold superfamily protein
arahy.A4G237	brown	SK	shikimate kinase 1
arahy.A4T2A7	brown	RH24	DEAD-box ATP-dependent RNA helicase-like protein
arahy.A58C4F	brown	RGA2	LRR and NB-ARC domain disease resistance protein
arahy.A58RJ7	brown	Os05g0497500	zinc finger CCCH domain-containing protein 38-like isoform X5 [Glycine max]
arahy.A5IPPM	brown	At1g06470	Nucleotide/sugar transporter family protein
arahy.A60648	brown	PRB1	CAP (Cysteine-rich secretory proteins, Antigen 5, and Pathogenesis-related 1 protein) superfamily protein
arahy.A6CKZL	brown	--	Unknown protein
arahy.A6CNFB	brown	CCX5	cation exchanger 11
arahy.A6GVEG	brown	CES101	receptor kinase 3
arahy.A6X2CD	brown	AFC3	Protein kinase superfamily protein
arahy.A74HRV	brown	ACA10	calcium-transporting ATPase 8, plasma membrane-type protein
arahy.A7H879	brown	VPS24-1	charged multivesicular body protein
arahy.A7KEBQ	brown	HAK5	Potassium transporter family protein
arahy.A7V6P3	brown	--	Man1-Src1p-carboxy-terminal domain protein
arahy.A863J5	brown	GS2	glutamine synthetase 2
arahy.A8CT9J	brown	UGPA	UTP-glucose-1-phosphate uridylyltransferase
arahy.A992JM	brown	SGT1	protein SGT1 homolog isoform X2 [Glycine max]
arahy.A9E66P	brown	HEME1	Uroporphyrinogen decarboxylase
arahy.A9GYM3	brown	--	unknown protein; FUNCTIONS IN: molecular_function unknown; INVOLVED IN: biological_process unknown; LOCATED IN: chloroplast, membrane; EXPRESSED IN: 23 plant structures; EXPRESSED DURING: 14 growth stages
arahy.A9I5GT	brown	SS3	starch synthase 3
arahy.A9RKWD	brown	EME1B	crossover junction endonuclease EME1B-like isoform X3 [Glycine max]
arahy.A9WCXI	brown	--	ankyrin repeat family protein
arahy.AAAS1H	brown	PRAF1	Regulator of chromosome condensation (RCC1) family protein
arahy.AAGE1X	brown	--	unknown protein; FUNCTIONS IN: molecular_function unknown; INVOLVED IN: biological_process unknown; LOCATED IN: mitochondrion, plastid; EXPRESSED IN: 24 plant structures; EXPRESSED DURING: 13 growth stages
arahy.AB919Y	brown	--	Tetratricopeptide repeat (TPR)-like superfamily protein
arahy.ABG1ZW	brown	BAM3	beta-amylase 1
arahy.ABWE2S	brown	HIPP36	Heavy metal transport/detoxification superfamily protein
arahy.AC170Q	brown	RANBPM	ran-binding protein 10-like isoform X1 [Glycine max]
arahy.AC1ID1	brown	PFK5	phosphofructokinase 5
arahy.AC2PA2	brown	--	RING/FYVE/PHD zinc finger superfamily protein
arahy.ACH06T	brown	KUA1	MYB transcription factor MYB173 [Glycine max]
arahy.ADAJ08	brown	OBGL	GTP-binding protein DLObg1-2 n=2 Tax=Dimocarpus longan RepID=G4XPB6_9ROSI
arahy.ADN3D2	brown	--	F-box/RNI-like superfamily protein
arahy.AE1MMP	brown	APC13	uncharacterized protein LOC100779178 isoform X1 [Glycine max]
arahy.AE34S8	brown	--	glucose-induced degradation protein 4 homolog [Glycine max]
arahy.AE3V6I	brown	Os06g0291600	D6 protein kinase like 2
arahy.AE80VE	brown	At1g10320	zinc finger CCCH domain-containing protein 5-like isoform X2 [Glycine max]
arahy.AES74V	brown	IAN9	P-loop containing nucleoside triphosphate hydrolases superfamily protein
arahy.AF56D0	brown	--	histone-lysine N-methyltransferase setd3-like protein
arahy.AF6NZ2	brown	--	1-phosphatidylinositol-3-phosphate 5-kinase FAB1B-like isoform X3 [Glycine max]
arahy.AF8Y24	brown	BXL6	beta-xylosidase 2
arahy.AFV0LT	brown	NET1B	golgin subfamily B member 1-like isoform X6 [Glycine max]
arahy.AG8GG0	brown	--	ARID/BRIGHT DNA-binding domain; ELM2 domain protein
arahy.AGE02H	brown	SUF4	zinc finger (C2H2 type) family protein
arahy.AGL6EL	brown	--	Forkhead-associated (FHA) domain-containing protein
arahy.AH329K	brown	Xab2	Pre-mRNA-splicing factor SYF1-like protein
arahy.AHVV25	brown	--	uncharacterized protein LOC100783651 [Glycine max]
arahy.AI3QN3	brown	PH1	Pleckstrin homology (PH) domain superfamily protein
arahy.AIPG6G	brown	TIF3C1	eukaryotic translation initiation factor 3 subunit C2
arahy.AK3WVB	brown	AVPL1	pyrophosphate-energized membrane proton pump 2-like [Glycine max]
arahy.AKE21I	brown	PIP	proline iminopeptidase
arahy.AL0C1A	brown	RH17	DEAD-box ATP-dependent RNA helicase-like protein
arahy.ALL5TI	brown	MSL6	Mechanosensitive ion channel family protein
arahy.ALLS5L	brown	atad1a	peptidyl-prolyl cis-trans isomerases; hydrolases; nucleoside-triphosphatases; ATP binding; nucleotide binding; ATPases
arahy.AMR3HT	brown	At5g61540	N(4)-(Beta-N-acetylglucosaminyl)-L-asparaginase n=12 Tax=Cetartiodactyla RepID=F1RT17_PIG
arahy.AMY8LP	brown	--	uncharacterized protein LOC100811297 isoform X3 [Glycine max]
arahy.ANY7XW	brown	At4g32940	vacuolar-processing enzyme-like [Glycine max]
arahy.AP71S7	brown	At3g23880	F-box and associated interaction domains-containing protein
arahy.APY3E0	brown	metl	Methyltransferase family protein
arahy.AQDN78	brown	--	disease resistance protein At4g27190-like isoform X1 [Glycine max]
arahy.AQQ3N0	brown	--	Unknown protein
arahy.AR6NCQ	brown	MBD13	methyl-CpG-binding domain-containing protein 13-like [Glycine max]
arahy.ARC7JY	brown	--	RING/U-box protein with C6HC-type zinc finger
arahy.ARK388	brown	--	Serine/threonine protein phosphatase family protein
arahy.ARQ7QI	brown	MTP1	Zinc ion transmembrane transporter n=2 Tax=Medicago RepID=C9WEK2_MEDSA
arahy.ARY3NI	brown	GRXC13	Glutaredoxin family protein
arahy.AU9Y8G	brown	GRIP	Golgi-localized GRIP domain-containing protein
arahy.AUFX4T	brown	UTR5	UDP-galactose transporter 5
arahy.AUV3TU	brown	TSJT1	stem-specific protein TSJT1-like [Glycine max]
arahy.AV1VK7	brown	MTERF15	Mitochondrial transcription termination factor family protein
arahy.AV4C6H	brown	--	impaired sucrose induction protein, putative
arahy.AVG7E5	brown	--	Unknown protein
arahy.AX7FJG	brown	KAS3A	3-oxoacyl-[acyl-carrier-protein] synthase 3 n=2 Tax=Synechococcus RepID=Q3B049_SYNS9
arahy.AXB33C	brown	UBQ10	Ubiquitin family protein
arahy.AY0SR4	brown	BZIP06	bZIP family transcription factor
arahy.AY0VQT	brown	MEE12	TATA box-binding protein associated factor RNA polymerase I subunit B-like protein
arahy.AY8PV2	brown	rplM	Ribosomal protein L13 family protein
arahy.B0WRJ9	brown	WIT2	WPP domain-interacting tail-anchored protein 2-like isoform X1 [Glycine max]
arahy.B27V0W	brown	--	plant/F14G9-20 protein
arahy.B2ZZCM	brown	HSC-2	heat shock protein 70
arahy.B30RUE	brown	ASAT1	MBOAT (membrane bound O-acyl transferase) family protein
arahy.B3BVJM	brown	ALB3L2	inner membrane protein OXA1-like
arahy.B3E7YS	brown	AKR4C9	aldo/keto reductase family oxidoreductase
arahy.B3GIUW	brown	--	Zinc knuckle nucleic acid-binding protein n=1 Tax=Grosmannia clavigera (strain kw1407 / UAMH 11150) RepID=F0XDM8_GROCL
arahy.B3SD72	brown	--	PLAC8 family protein
arahy.B43C0Z	brown	--	uncharacterized protein LOC100794263 isoform X3 [Glycine max]
arahy.B4BR5H	brown	--	Unknown protein
arahy.B4HFY2	brown	SIP2-1	major intrinsic protein (MIP) family transporter
arahy.B4TVCG	brown	zcchc8	Nucleic acid binding protein, putative n=1 Tax=Ricinus communis RepID=B9SJ03_RICCO
arahy.B5S4LJ	brown	SNF4	sucrose nonfermenting 4-like protein-like isoform X3 [Glycine max]
arahy.B5Z1I8	brown	emc3	ER membrane protein complex subunit-like protein
arahy.B625T0	brown	RNP1	RNA-binding (RRM/RBD/RNP motifs) family protein
arahy.B67DTF	brown	NAT12	nucleobase-ascorbate transporter 12
arahy.B6931F	brown	DEGP10	Serine-type endopeptidase isoform 2 n=2 Tax=Galdieria sulphuraria RepID=M2XV60_GALSU
arahy.B6L6EA	brown	--	Unknown protein
arahy.B6M36H	brown	--	hypothetical protein
arahy.B6QDWV	brown	NRG2	Protein of unknown function (DUF630 and DUF632)
arahy.B6TC73	brown	Grxcr1	uncharacterized protein At5g39865-like [Glycine max]
arahy.B6WW7F	brown	PAG1	proteasome subunit alpha type-6-A protein
arahy.B78934	brown	IDH5	isocitrate dehydrogenase V
arahy.B7BMME	brown	dph1	diphthamide biosynthesis protein 1-like [Glycine max]
arahy.B7LRKU	brown	FTB	protein farnesyltransferase subunit beta [Glycine max]
arahy.B8KV7F	brown	SEC16B	RGPR-related
arahy.B96KF5	brown	--	histone-lysine N-methyltransferase setd3-like protein
arahy.B9A4XU	brown	ABI5	abscisic acid responsive element-binding factor 1
arahy.BA6WS2	brown	--	uncharacterized protein LOC100811354 isoform X2 [Glycine max]
arahy.BAI8MS	brown	--	uncharacterized protein LOC100804276 isoform X2 [Glycine max]
arahy.BB05SX	brown	--	Unknown protein
arahy.BB0AZK	brown	SYP22	syntaxin, putative
arahy.BBM6FL	brown	CBSDUFCH2	receptor-like protein kinase 2
arahy.BBR3FV	brown	BB	RING finger protein 38-like [Glycine max]
arahy.BCD3BN	brown	--	uncharacterized protein LOC100814035 [Glycine max]
arahy.BCQ50G	brown	rrp36	ribosomal RNA processing protein 36 homolog isoform X1 [Glycine max]
arahy.BCZ98G	brown	SHM1	serine hydroxymethyltransferase 2
arahy.BD0PPI	brown	BSL3	Serine/threonine protein phosphatase family protein
arahy.BD5KCN	brown	TUBA1	tubulin alpha-4 chain
arahy.BD8YIG	brown	SUD1	RING/FYVE/PHD zinc finger superfamily protein
arahy.BDUB1I	brown	AGC1-5	Protein kinase superfamily protein
arahy.BE5MC1	brown	CAX3	vacuolar cation/proton exchanger 3
arahy.BEB4AA	brown	sen1	P-loop containing nucleoside triphosphate hydrolases superfamily protein
arahy.BEGE34	brown	--	unknown protein
arahy.BEP26V	brown	PHOS32	Adenine nucleotide alpha hydrolases-like superfamily protein
arahy.BEVL6N	brown	pc1998	RNA methyltransferase n=2 Tax=Bacillus RepID=U5L4Y7_9BACI
arahy.BF2R1L	brown	PSRP3	Ribosomal protein PSRP-3/Ycf65
arahy.BFCK6T	brown	FTSHI3	ATP-dependent zinc metalloprotease FtsH-like [Glycine max]
arahy.BFE9YH	brown	PFP-ALPHA	diphosphate--fructose-6-phosphate 1-phosphotransferase n=1 Tax=Proteiniphilum acetatigenes RepID=UPI0003652DBE
arahy.BGF2TK	brown	DGD1	digalactosyldiacylglycerol synthase 1, chloroplastic-like [Glycine max]
arahy.BH4E67	brown	trmL	RNA methyltransferase n=1 Tax=Paenibacillus sp. A9 RepID=UPI00037B75DA
arahy.BHNU0I	brown	NAP1;2	nucleosome assembly protein 1; 2
arahy.BJ0GJS	brown	ERDJ7	dnaJ homolog subfamily C member 25 homolog [Glycine max]
arahy.BJ0SSX	brown	AP1M2	Clathrin adaptor complexes medium subunit family protein
arahy.BK9Z4I	brown	--	Unknown protein
arahy.BKZY3B	brown	PPIE	peptidyl-prolyl cis-trans isomerase E-like protein
arahy.BL35NN	brown	--	uncharacterized protein LOC100814523 isoform X2 [Glycine max]
arahy.BLPL36	brown	BRG3	SBP (S-ribonuclease binding protein) family protein
arahy.BM19ED	brown	At1g16930	F-box/RNI-like superfamily protein
arahy.BMQ6HD	brown	CG7185	RNA-binding (RRM/RBD/RNP motifs) family protein
arahy.BMR428	brown	--	DnaJ/Hsp40 cysteine-rich domain superfamily protein
arahy.BNFW26	brown	--	Unknown protein
arahy.BPEV7T	brown	Os03g0815200	methylenetetrahydrofolate reductase 2
arahy.BQ5IA6	brown	--	Unknown protein
arahy.BQ5T6G	brown	grpE	Co-chaperone GrpE family protein
arahy.BQW33I	brown	PMA1	plasma membrane H+-ATPase
arahy.BS6RY8	brown	MYOB7	uncharacterized protein LOC102665201 isoform X3 [Glycine max]
arahy.BSR962	brown	PIX13	Protein kinase superfamily protein
arahy.BT5S0A	brown	--	unknown protein; FUNCTIONS IN: molecular_function unknown; INVOLVED IN: biological_process unknown; LOCATED IN: cellular_component unknown
arahy.BTB9WU	brown	SKIP35	F-box/ankyrin repeat protein SKIP35-like isoform X2 [Glycine max]
arahy.BTC05T	brown	PCMP-H81	Pentatricopeptide repeat (PPR) superfamily protein
arahy.BTE5MM	brown	NFYB2	nuclear transcription factor Y subunit B-2 [Glycine max]
arahy.BTSV3Q	brown	TUN	Chitobiosyldiphosphodolichol beta-mannosyltransferase n=5 Tax=Papilionoideae RepID=G7IH35_MEDTR
arahy.BU2ALQ	brown	CLPA	Regulator of Vps4 activity in the MVB pathway protein
arahy.BV4TL7	brown	Os09g0505700	D-ribulose-5-phosphate-3-epimerase
arahy.BV8AZF	brown	APT1	adenine phosphoribosyltransferase 5
arahy.BVM079	brown	--	Pleckstrin homology (PH) domain-containing protein
arahy.BW0ALG	brown	PETH	ferredoxin-NADP(+)-oxidoreductase 1
arahy.BW40YJ	brown	OEP164	Mitochondrial import inner membrane translocase subunit Tim17/Tim22/Tim23 family protein
arahy.BW67JI	brown	CALS10	callose synthase 5
arahy.BW9NFB	brown	--	dentin sialophosphoprotein-like isoform X3 [Glycine max]
arahy.BWQM5V	brown	PAP23	purple acid phosphatase 15
arahy.BXG275	brown	rpsE	Structural constituent of ribosome n=2 Tax=Zea mays RepID=B6SVP3_MAIZE
arahy.BXHN9I	brown	At1g12775	Pentatricopeptide repeat (PPR) superfamily protein
arahy.BXVS1E	brown	GGCT2;1	ChaC-like family protein
arahy.BY6BY7	brown	crn	Crooked neck pre mRNA splicing factor 1 n=2 Tax=Echinococcus RepID=U6HY55_ECHMU
arahy.BY82ZN	brown	--	Pentatricopeptide repeat (PPR) superfamily protein
arahy.BZ8WB7	brown	RHC1A	RING finger protein 44-like [Glycine max]
arahy.BZP5X4	brown	Stk16	serine/threonine protein kinase 3
arahy.BZV88W	brown	At5g61540	N(4)-(beta-N-acetylglucosaminyl)-L-asparaginase n=22 Tax=Simiiformes RepID=ASPG_HUMAN
arahy.C0G1TY	brown	RBL13	RHOMBOID-like protein 13
arahy.C0GFHN	brown	ARIA	ARM REPEAT PROTEIN INTERACTING WITH ABF2-like isoform X1 [Glycine max]
arahy.C0Z8UU	brown	IVD	isovaleryl-CoA-dehydrogenase
arahy.C1RHT9	brown	--	uncharacterized protein LOC100817673 [Glycine max]
arahy.C252F7	brown	TOC132	translocase of chloroplast 132, chloroplastic-like [Glycine max]
arahy.C265D9	brown	WDR26	WD repeat-containing protein 26-like [Glycine max]
arahy.C2ETWN	brown	--	Unknown protein
arahy.C2LQEN	brown	acyP	SAUR-like auxin-responsive protein family
arahy.C2TYHM	brown	RPL27	Ribosomal protein L27 family protein
arahy.C35Y2E	brown	--	unknown protein
arahy.C37FLM	brown	RABB1C	GTP-binding nuclear Ran-like protein
arahy.C3HPWP	brown	LBD37	LOB domain-containing protein 39
arahy.C3KWK0	brown	CHIP	E3 ubiquitin-protein ligase CHIP-like [Glycine max]
arahy.C470Y6	brown	DFR	dihydroflavonol 4-reductase
arahy.C4H7FM	brown	CYP71A1	Cytochrome P450 superfamily protein
arahy.C4UAPE	brown	At5g63520	F-box/LRR-repeat protein At5g63520-like isoform X1 [Glycine max]
arahy.C4USX8	brown	--	octicosapeptide/Phox/Bem1p (PB1) domain-containing protein
arahy.C4Z81U	brown	--	Zinc finger protein cchc domain containing protein, putative n=7 Tax=Entamoeba RepID=B0EA52_ENTDS
arahy.C56Y99	brown	At4g31860	Protein phosphatase 2C family protein
arahy.C5M9FF	brown	--	uncharacterized protein LOC102664163 isoform X7 [Glycine max]
arahy.C5REQA	brown	MOCS3	adenylyltransferase and sulfurtransferase MOCS3-like [Glycine max]
arahy.C5YUKW	brown	Ergic3	endoplasmic reticulum-Golgi intermediate compartment protein 3-like [Glycine max]
arahy.C65CX3	brown	--	pre-rRNA-processing protein TSR2
arahy.C718TQ	brown	--	RNA recognition motif (RRM)-containing protein
arahy.C7FV9J	brown	LCMT1	Leucine carboxyl methyltransferase
arahy.C821YF	brown	ELP1	elongator complex protein
arahy.C869MB	brown	At1g08370	mRNA-decapping enzyme-like protein
arahy.C8BUG5	brown	--	F-box/RNI/FBD-like domain protein
arahy.C8BV8A	brown	CPL3	C-terminal domain phosphatase-like 3
arahy.C8Z94U	brown	PTAC2	Pentatricopeptide repeat (PPR) superfamily protein
arahy.C93UP7	brown	LHT1	Transmembrane amino acid transporter family protein
arahy.C95Z0S	brown	At1g31730	AP-4 complex subunit epsilon
arahy.C96CVE	brown	HI_1198	Sua5/YciO/YrdC/YwlC family protein n=12 Tax=Bacteroides RepID=I9TKS9_9BACE
arahy.C9KQAV	brown	GAUT14	probable galacturonosyltransferase 14-like [Glycine max]
arahy.C9M2V3	brown	At2g40280	probable methyltransferase PMT23-like [Glycine max]
arahy.C9QL2M	brown	FBA8	fructose-bisphosphate aldolase 2
arahy.C9SJ52	brown	RH57	DEAD-box ATP-dependent RNA helicase
arahy.C9ULKZ	brown	MLS	malate synthase
arahy.C9Y7N1	brown	ABCI7	FeS assembly protein SufD
arahy.CB8VHN	brown	SPCC1827.05c	RNA-binding (RRM/RBD/RNP motifs) family protein
arahy.CBKZ0V	brown	Ttll12	tubulin-tyrosine ligase family protein
arahy.CC1FIV	brown	AHL3	AT hook motif DNA-binding family protein
arahy.CDA2TW	brown	Cfap20	transcription factor IIB
arahy.CE15SM	brown	--	Unknown protein
arahy.CE7Z9D	brown	DDB_G0292320	UNC-50 family protein
arahy.CEK4FM	brown	CG31957	Eukaryotic translation initiation factor 1A n=1 Tax=Capsaspora owczarzaki (strain ATCC 30864) RepID=E9C5P8_CAPO3
arahy.CG0SMC	brown	--	Plasma-membrane choline transporter family protein
arahy.CGPP17	brown	prpf39	Pre-mRNA-processing factor 39
arahy.CHS32V	brown	DRP5A	Dynamin related protein 5A
arahy.CI0Z11	brown	At4g10955	GDSL esterase/lipase plant-like protein
arahy.CJD9B0	brown	RDR6	RNA-dependent RNA polymerase 6
arahy.CJT9N9	brown	At1g77260	probable methyltransferase PMT10-like [Glycine max]
arahy.CME6C7	brown	POL	Protein phosphatase 2C family protein
arahy.CMX2VV	brown	PICBP	dentin sialophosphoprotein-like isoform X2 [Glycine max]
arahy.CN3GCM	brown	TRX1	Thioredoxin superfamily protein
arahy.CP70Z4	brown	YPQ1	PQ-loop repeat family protein / transmembrane family protein
arahy.CP887V	brown	UBC4	ubiquitin-conjugating enzyme 5
arahy.CPIQ3I	brown	RPRD1A	regulation of nuclear pre-mRNA domain-containing protein 1B-like isoform X4 [Glycine max]
arahy.CQRQ5Y	brown	--	Unknown protein
arahy.CRK2RL	brown	B''BETA	probable serine/threonine protein phosphatase 2A regulatory subunit B''delta-like isoform X3 [Glycine max]
arahy.CRT4IM	brown	--	uncharacterized protein LOC100797045 isoform X2 [Glycine max]
arahy.CS4MIP	brown	At1g67300	sugar porter (SP) family MFS transporter
arahy.CSBF71	brown	At5g41620	uncharacterized protein At5g41620-like [Glycine max]
arahy.CSM94Q	brown	At1g06270	Pentatricopeptide repeat (PPR) superfamily protein
arahy.CTKR59	brown	Dscr3	down syndrome critical region protein, putative
arahy.CU0EG8	brown	At3g54130	ataxin-3 homolog isoform X1 [Glycine max]
arahy.CU1T9Z	brown	--	Pentatricopeptide repeat (PPR) superfamily protein
arahy.CV46RI	brown	ALY1	RNA-binding protein 39-like isoform X2 [Glycine max]
arahy.CVD0A8	brown	MURE	UDP-N-acetylmuramoyl-L-alanyl-D-glutamate--2, 6-diaminopimelate ligase n=2 Tax=Triticeae RepID=M8CZJ8_AEGTA
arahy.CVT8CA	brown	--	Cytochrome B5 n=1 Tax=Medicago truncatula RepID=G8A2A7_MEDTR
arahy.CW9EKZ	brown	secA	preprotein translocase subunit SecA
arahy.CWB0DA	brown	--	ubiquitin-protein ligase
arahy.CXZ5TN	brown	--	maternal effect embryo arrest protein
arahy.CYD8BJ	brown	ADCS	Glutamine amidotransferase type 1 family protein
arahy.CYLD0E	brown	--	Unknown protein
arahy.CZ320C	brown	--	Ribonucleases P/MRP protein subunit POP1-like n=3 Tax=Arabidopsis RepID=F4IL30_ARATH
arahy.CZ3U7F	brown	PIX13	Protein kinase superfamily protein
arahy.CZ6VEU	brown	RBCMT	Ribulose-1,5 bisphosphate carboxylase/oxygenase large subunit N-methyltransferase, chloroplast, putative n=1 Tax=Ricinus communis RepID=B9T1U1_RICCO
arahy.D0CPN9	brown	--	LRR and NB-ARC domain disease resistance protein
arahy.D0L726	brown	ATPK2	protein serine/threonine phosphatases; protein kinases; catalytics; cAMP-dependent protein kinase regulators; ATP binding; protein serine/threonine phosphatases
arahy.D14EQ1	brown	--	Unknown protein
arahy.D1GULF	brown	ADO1	kelch domain-containing protein 4-like isoform X1 [Glycine max]
arahy.D1HFUG	brown	TULP3	tubby like protein 3
arahy.D1K6PT	brown	Acin1	apoptotic chromatin condensation inducer in the nucleus-like isoform X2 [Glycine max]
arahy.D1YXCG	brown	MEFG1	elongation factor Tu GTP-binding domain protein
arahy.D26UBJ	brown	RNGTT	mRNA capping enzyme family protein
arahy.D26Z0K	brown	grwd1	WD-40 repeat family protein
arahy.D29P6J	brown	CKA4	casein kinase alpha 1
arahy.D2JCSM	brown	GC6	golgin candidate 6-like isoform X1 [Glycine max]
arahy.D2PCJK	brown	EHD3	uncharacterized protein LOC100818931 isoform X4 [Glycine max]
arahy.D2V5IT	brown	STE1	delta(7)-sterol-C5(6)-desaturase-like protein
arahy.D3BLAG	brown	--	protein LTV1 homolog isoform X2 [Glycine max]
arahy.D3E6GM	brown	ARFRP1	ADP-ribosylation factor 1
arahy.D3MK98	brown	At4g01037	protein ROOT PRIMORDIUM DEFECTIVE 1-like isoform X4 [Glycine max]
arahy.D41UNS	brown	ING1	Inhibitor of growth proteins histone-binding protein n=4 Tax=Musca domestica RepID=T1P9R5_MUSDO
arahy.D4218R	brown	FAB1B	phosphatidylinositol-4-phosphate 5-kinase family protein
arahy.D4358L	brown	Os03g0733400	HAT family dimerisation domain containing protein n=1 Tax=Oryza sativa subsp. japonica RepID=Q2QPQ7_ORYSJ
arahy.D4DNRS	brown	ERD2	ER lumen protein retaining receptor family protein
arahy.D4JDZB	brown	SKL1	shikimate kinase like 1
arahy.D4N0FV	brown	PHOT1	serine/threonine-protein kinase TIO-like [Glycine max]
arahy.D4QB27	brown	--	Unknown protein
arahy.D4REW6	brown	UBL5	ubiquitin-like protein 5
arahy.D5PS1Z	brown	slc25a24	calcium-binding mitochondrial carrier protein SCaMC-2-like [Glycine max]
arahy.D5PZ9F	brown	CYP75B1	Cytochrome P450 superfamily protein
arahy.D5QJZZ	brown	MEFG1	elongation factor Tu GTP-binding domain protein
arahy.D607PC	brown	PUB8	U-box domain-containing protein 8-like [Glycine max]
arahy.D60SL5	brown	--	trafficking protein particle complex subunit 8-like [Glycine max]
arahy.D6X22R	brown	VPS54	vacuolar protein sorting-associated protein 54-like [Glycine max]
arahy.D773D7	brown	BT2	BTB and TAZ domain protein 2
arahy.D7E6ZG	brown	rplY	50S ribosomal protein L25, putative
arahy.D7FRIU	brown	VAB	uncharacterized protein LOC100814874 isoform X2 [Glycine max]
arahy.D9Y8GI	brown	SPAC57A10.07	uncharacterized protein C57A10.07-like [Glycine max]
arahy.DA1J6X	brown	ERD14	Dehydrin family protein
arahy.DA1MAK	brown	--	C-Myc-binding-like protein
arahy.DAR9EC	brown	--	fiber protein Fb34
arahy.DB005U	brown	ERD2	ER lumen protein retaining receptor family protein
arahy.DC6B04	brown	PPD	pyruvate orthophosphate dikinase
arahy.DC6XCB	brown	HISN2	histidine biosynthesis bifunctional protein (HISIE)
arahy.DCX0GA	brown	--	protein SPT2 homolog isoform X1 [Glycine max]
arahy.DF5JNQ	brown	IRE1A	protein kinase family protein
arahy.DFZ2U0	brown	PUB44	U-box domain-containing protein 44-like [Glycine max]
arahy.DG0T3J	brown	GATA9	GATA transcription factor 9
arahy.DG1RWB	brown	--	Adenine nucleotide alpha hydrolases-like superfamily protein
arahy.DGU1VQ	brown	--	pre-rRNA-processing protein TSR2
arahy.DGZF1S	brown	At1g56220	Dormancy/auxin associated family protein
arahy.DH8F8S	brown	ACA2	calcium-transporting ATPase 2, plasma membrane-type protein
arahy.DHG9YX	brown	TIC	protein TIME FOR COFFEE-like isoform X1 [Glycine max]
arahy.DHQL63	brown	NUA	nuclear pore anchor
arahy.DJ08GF	brown	PCMP-H92	Pentatricopeptide repeat (PPR) superfamily protein
arahy.DJ1VY2	brown	rplX	50S ribosomal L24-like protein
arahy.DJ2BV6	brown	BCAT2	branched-chain amino acid transaminase 2
arahy.DJ3VX7	brown	acoC	alpha/beta-Hydrolases superfamily protein
arahy.DK6PXF	brown	CLPB4	ATP-dependent chaperone ClpB
arahy.DKD5NS	brown	PPC6-1	Protein phosphatase 2C family protein
arahy.DL173G	brown	--	Octicosapeptide/Phox/Bem1p family protein
arahy.DL1AJH	brown	C15orf40	UPF0235 C15orf40-like protein
arahy.DL1CJS	brown	Wdr83	WD repeat-containing protein 5-like [Glycine max]
arahy.DL456K	brown	--	uncharacterized protein LOC100527473 [Glycine max]
arahy.DLTR3L	brown	RPP13	LRR and NB-ARC domain disease resistance protein
arahy.DM7MDF	brown	AHK1	histidine kinase 1
arahy.DNW88Q	brown	--	transmembrane protein adipocyte-associated 1 homolog [Glycine max]
arahy.DNY4I5	brown	DNAJB4	dnaJ protein homolog 1-like [Glycine max]
arahy.DNZ3MM	brown	FDM1	XH/XS domain-containing protein
arahy.DP0IAK	brown	NAPRT1	nicotinate phosphoribosyltransferase-like [Glycine max]
arahy.DPK6V1	brown	STK38L	Protein kinase family protein
arahy.DPV4Y1	brown	MTERF4	Mitochondrial transcription termination factor family protein
arahy.DRAR7X	brown	SGT1	protein SGT1 homolog isoform X2 [Glycine max]
arahy.DRZ38W	brown	KIN10	protein serine/threonine phosphatases; protein kinases; catalytics; cAMP-dependent protein kinase regulators; ATP binding; protein serine/threonine phosphatases
arahy.DSL29X	brown	--	SWAP (suppressor-of-white-APricot)/surp domain protein, putative
arahy.DT469U	brown	MRL7	Thioredoxin superfamily protein
arahy.DTCT6H	brown	BGAL15	beta-galactosidase 7
arahy.DTRW9U	brown	OVA9	glutamine-tRNA ligase, putative / glutaminyl-tRNA synthetase, putative / GlnRS, putative
arahy.DU2BQF	brown	mettl23	Putative methyltransferase family protein
arahy.DU6PK2	brown	PRO1	profilin 1
arahy.DW1R6S	brown	N	disease resistance protein (TIR-NBS-LRR class), putative
arahy.DW6FDI	brown	--	uncharacterized protein LOC100806036 isoform X2 [Glycine max]
arahy.DW86GH	brown	At5g61540	N-terminal nucleophile aminohydrolases (Ntn hydrolases) superfamily protein
arahy.DWF5LN	brown	--	RING/FYVE/PHD zinc finger superfamily protein
arahy.DYF5WN	brown	EDM2	uncharacterized protein LOC100810533 isoform X3 [Glycine max]
arahy.E042AL	brown	GOT1	Got1/Sft2-like vescicle transport protein family
arahy.E07S37	brown	ABCD1	ABC transporter D family member 1-like isoform X2 [Glycine max]
arahy.E0MR6R	brown	PUB35	protein kinase family protein
arahy.E0MSA2	brown	--	serine/arginine-rich splicing factor 4-like isoform X1 [Glycine max]
arahy.E0X5DU	brown	NFYA3	CCAAT-binding transcription factor
arahy.E13FL8	brown	PTAC7	plastid transcriptionally active protein
arahy.E16Z9R	brown	Ylpm1	P-loop containing nucleoside triphosphate hydrolases superfamily protein
arahy.E23JR7	brown	SERK4	receptor kinase 2
arahy.E26CBN	brown	--	Unknown protein
arahy.E29CP8	brown	--	Unknown protein
arahy.E2DHW8	brown	ATE1	arginyl-tRNA-protein transferase
arahy.E2LUKB	brown	SPX4	SPX domain gene 4
arahy.E2N38F	brown	SFH13	Sec14p-like phosphatidylinositol transfer family protein
arahy.E2QT4D	brown	REP	rab proteins geranylgeranyltransferase component A-like [Glycine max]
arahy.E2X1XL	brown	At5g17010	sugar transport protein 14-like [Glycine max]
arahy.E2XQ4Y	brown	TRAF1A	MATH domain-containing protein At5g43560-like isoform X1 [Glycine max]
arahy.E356RC	brown	UBQ10	ubiquitin 4
arahy.E4IRCP	brown	Ddx59	DEAD-box ATP-dependent RNA helicase 41-like isoform X1 [Glycine max]
arahy.E4NQM7	brown	--	RING/FYVE/PHD zinc finger protein
arahy.E56FPD	brown	--	Unknown protein
arahy.E59C1E	brown	PGR3	Pentatricopeptide repeat (PPR) superfamily protein
arahy.E5U4BY	brown	Os08g0536000	pyruvate dehydrogenase E1 component subunit beta
arahy.E7DDSD	brown	At2g18990	thioredoxin domain-containing protein 9 homolog
arahy.E7NIDV	brown	SIA1	Glycosyltransferase family 29 (sialyltransferase) family protein
arahy.E7P91P	brown	Hgsnat	heparan-alpha-glucosaminide N-acetyltransferase-like protein
arahy.E7WHUM	brown	TATA	Sec-independent protein translocase protein TatA n=1 Tax=Synechococcus sp. WH 8016 RepID=G4FMF1_9SYNE
arahy.E7XDIB	brown	Sbds	ribosome maturation protein SBDS-like [Glycine max]
arahy.E8HHXW	brown	--	uncharacterized protein LOC102664163 isoform X7 [Glycine max]
arahy.E8QLCY	brown	--	RNA-binding region RNP-1 (RNA recognition motif); Pyridoxal-dependent decarboxylase n=1 Tax=Medicago truncatula RepID=A2Q361_MEDTR
arahy.E9F7LA	brown	At4g17616	Pentatricopeptide repeat (PPR) superfamily protein
arahy.E9FA5X	brown	VIII-1	myosin-1-like isoform X2 [Glycine max]
arahy.EA1KYK	brown	CRWN3	nuclear matrix constituent protein-related
arahy.EABL5T	brown	At3g55350	putative nuclease HARBI1-like [Glycine max]
arahy.EAS95G	brown	DYW10	pentatricopeptide (PPR) repeat-containing protein
arahy.EB7VHI	brown	At5g13110	glucose-6-phosphate dehydrogenase 2
arahy.EBNE7V	brown	--	KRR1 family protein
arahy.EBYZ1J	brown	AGD8	ADP-ribosylation factor GTPase-activating protein AGD10
arahy.EC53M8	brown	--	Unknown protein
arahy.EC9EW7	brown	PABN3	polyadenylate-binding protein 1
arahy.ECZP7J	brown	UPP	uracil phosphoribosyltransferase
arahy.ED89BB	brown	BT1	mitochondrial substrate carrier family protein B-like [Glycine max]
arahy.ED9KUA	brown	Os02g0146600	DEAD-box ATP-dependent RNA helicase
arahy.EDIF3D	brown	--	phosphatidylinositol 4-kinase beta 1-like isoform X2 [Glycine max]
arahy.EDY71B	brown	--	triacylglycerol lipase 2-like isoform X2 [Glycine max]
arahy.EE1FTG	brown	mettl23	Putative methyltransferase family protein
arahy.EEIT90	brown	--	receptor-like kinase
arahy.EFL7R6	brown	FOLD1	bifunctional 5,10-methylene-tetrahydrofolate dehydrogenase/ 5,10-methylene-tetrahydrofolate cyclohydrolase n=1 Tax=Paenibacillus sp. OSY-SE RepID=UPI0002E54262
arahy.EFZ9HZ	brown	At1g23400	RNA-binding CRS1 / YhbY (CRM) domain-containing protein
arahy.EG1I0Q	brown	cmbl	endo-1,3; 1,4-beta-D-glucanase [Glycine max]
arahy.EG4IG2	brown	TULP5	tubby-like F-box protein 5-like isoform X2 [Glycine max]
arahy.EH3TRU	brown	RAD4	DNA repair protein complementing xp-C cells-like protein
arahy.EH65IB	brown	--	dual specificity protein kinase shkD-like [Glycine max]
arahy.EJ5JLW	brown	RD21B	cysteine proteinase1
arahy.EJ6VAJ	brown	At1g08370	mRNA-decapping enzyme-like protein
arahy.EK04TZ	brown	VIP2	inositol hexakisphosphate and diphosphoinositol-pentakisphosphate kinase-like isoform X1 [Glycine max]
arahy.EKRS97	brown	YSL11	metal-nicotianamine transporter YSL3-like isoform X3 [Glycine max]
arahy.EL2JAL	brown	ERDJ3B	DNAJ homologue 3
arahy.EL42AR	brown	--	uncharacterized protein LOC100806290 isoform X3 [Glycine max]
arahy.ELEM58	brown	Acin1	apoptotic chromatin condensation inducer in the nucleus-like [Glycine max]
arahy.EMDZ87	brown	At5g41620	uncharacterized protein At5g41620-like [Glycine max]
arahy.EN1JYH	brown	At5g61370	Pentatricopeptide repeat (PPR) superfamily protein
arahy.EN4Q1L	brown	At5g14590	isocitrate dehydrogenase
arahy.EN9PMD	brown	At1g01350	RING zinc finger protein, putative
arahy.EP0JTS	brown	RLP51	LRR receptor-like kinase family protein
arahy.EP17SZ	brown	NUP85	Nup85 nucleoporin protein
arahy.EP35YN	brown	--	unknown protein
arahy.EP3JHE	brown	CP33	RNA-binding protein 39-like [Glycine max]
arahy.EPG4M4	brown	YPQ1	PQ-loop repeat family protein / transmembrane family protein
arahy.EQU2N6	brown	4CL3	4-coumarate:CoA ligase 3
arahy.ER1LI4	brown	WDR26	WD repeat-containing protein 26-like [Glycine max]
arahy.ES3V94	brown	--	unknown protein; Has 30201 Blast hits to 17322 proteins in 780 species: Archae - 12; Bacteria - 1396; Metazoa - 17338; Fungi - 3422; Plants - 5037; Viruses - 0; Other Eukaryotes - 2996 (source: NCBI BLink).
arahy.ES9RY0	brown	RNP1	RNA-binding protein 1-like [Glycine max]
arahy.ET9IK9	brown	--	Unknown protein
arahy.EU6551	brown	psmg2	proteasome assembly chaperone 2-like [Glycine max]
arahy.EV3R4X	brown	At1g47340	F-box protein interaction domain protein
arahy.EW5W0P	brown	At5g10820	folate/biopterin transporter
arahy.EWF75K	brown	PAP11	Plastid-lipid associated protein PAP / fibrillin family protein
arahy.EWVD58	brown	KIN14R	ATP binding microtubule motor family protein
arahy.EX0095	brown	CRK3	Calcium/calmodulin-dependent serine/threonine-protein kinase 1 n=5 Tax=Oryza RepID=CAMK1_ORYSJ
arahy.EY3S6Y	brown	PBL27	Protein kinase superfamily protein
arahy.EYB30S	brown	--	uncharacterized protein LOC100793947 [Glycine max]
arahy.EZE0FP	brown	PBL5	Protein kinase superfamily protein
arahy.EZF9NP	brown	CD4B	ATP-dependent Clp protease ATP-binding subunit
arahy.F3DNME	brown	DELTA-OAT	ornithine-delta-aminotransferase
arahy.F3H2RC	brown	--	Unknown protein
arahy.F3RMTH	brown	At3g09060	Pentatricopeptide repeat (PPR) superfamily protein
arahy.F48FAV	brown	SAMDC	Adenosylmethionine decarboxylase family protein
arahy.F4A8JX	brown	--	Pentatricopeptide repeat (PPR) superfamily protein
arahy.F4B66A	brown	UREF	urease accessory protein UreF
arahy.F4I7X2	brown	--	F11A6.1 protein, putative n=1 Tax=Theobroma cacao RepID=UPI00042B56C6
arahy.F69QA3	brown	--	RING/FYVE/PHD zinc finger superfamily protein
arahy.F6DY4B	brown	VTC2	GDP-L-galactose phosphorylase 1-like [Glycine max]
arahy.F6QEBB	brown	GgCAS1	cycloartenol synthase 1
arahy.F6YBSJ	brown	FRS3	protein FAR1-RELATED SEQUENCE 3-like isoform X1 [Glycine max]
arahy.F70XYS	brown	--	hypothetical protein
arahy.F753KD	brown	IAA8	indole-3-acetic acid inducible 9
arahy.F79NB3	brown	AMPD	AMP deaminase-like [Glycine max]
arahy.F7A2EF	brown	--	transferring glycosyl group transferase
arahy.F84X5J	brown	TAR1-A	senescence-associated protein
arahy.F8B6JQ	brown	CIP8	F-box/LRR-repeat protein 7-like [Glycine max]
arahy.F8BNUE	brown	RPRD1B	regulation of nuclear pre-mRNA domain-containing protein 1A-like isoform X3 [Glycine max]
arahy.F8HZ0X	brown	gpatch11	Nucleic acid binding protein, putative n=1 Tax=Ricinus communis RepID=B9T273_RICCO
arahy.F96WR3	brown	AIH	Agmatine deiminase n=1 Tax=Pseudomonas sp. (strain M1) RepID=W5
arahy.F9GNLP	brown	GRDP1	uncharacterized protein LOC100782361 isoform X5 [Glycine max]
arahy.FAC3HW	brown	EIF4B1	eukaryotic translation initiation factor 4B1
arahy.FAWA0L	brown	At5g10900	serine/threonine phosphatase 7
arahy.FB4WK1	brown	--	uncharacterized protein LOC100789779 isoform X1 [Glycine max]
arahy.FB5GTI	brown	HSP70-16	heat shock protein 91
arahy.FC0SK2	brown	WIP2	WPP domain interacting protein 1
arahy.FC3EP2	brown	At2g17525	Pentatricopeptide repeat (PPR) superfamily protein
arahy.FCT4V3	brown	At2g32040	folate/biopterin transporter
arahy.FD1PW0	brown	At5g47720	probable acetyl-CoA acetyltransferase, cytosolic 2 isoform X1 [Glycine max]
arahy.FE4WD3	brown	GLCAT14A	Core-2/I-branching beta-1,6-N-acetylglucosaminyltransferase family protein
arahy.FEK9G3	brown	At2g02050	NADH-ubiquinone oxidoreductase B18 subunit, putative
arahy.FF119L	brown	ndhB1	prefoldin subunit 6-like isoform X7 [Glycine max]
arahy.FFMP8K	brown	CYCT1-5	Cyclin-dependent protein kinase n=5 Tax=Andropogoneae RepID=B6SH69_MAIZE
arahy.FG5UUT	brown	--	Unknown protein
arahy.FH7HBW	brown	--	uncharacterized protein LOC100781148 isoform X1 [Glycine max]
arahy.FHH1YD	brown	TYW1	tRNA wybutosine-synthesizing protein 1 homolog [Glycine max]
arahy.FHX76J	brown	RPP2A	Disease resistance protein (TIR-NBS-LRR class) family
arahy.FI1VU9	brown	PEX5	peroxisomal targeting signal 1 receptor
arahy.FI466Z	brown	TOR1	microtubule-associated protein TORTIFOLIA1-like isoform X1 [Glycine max]
arahy.FJ253B	brown	fabD	malonyl CoA-acyl carrier transacylase
arahy.FJ9VJT	brown	--	uncharacterized protein LOC100803807 isoform X4 [Glycine max]
arahy.FKP2UG	brown	NDT1	lipoamide acyltransferase component of branched-chain alpha-keto acid dehydrogenase complex, mitochondrial-like isoform X2 [Glycine max]
arahy.FL369X	brown	NERD	nucleic acid binding; zinc ion binding; DNA binding
arahy.FL5QND	brown	ACP1	acyl carrier protein 3
arahy.FLDV8W	brown	CCR4-6	carbon catabolite repressor-like protein
arahy.FLQ7SK	brown	At4g18975	Pentatricopeptide repeat (PPR) superfamily protein
arahy.FM3F8T	brown	HEN4	RNA-binding KH domain-containing protein
arahy.FMIZ2E	brown	--	Unknown protein
arahy.FMT65J	brown	MED7A	mediator of RNA polymerase II transcription subunit 7
arahy.FNDT39	brown	PAT24	DHHC-type zinc finger family protein
arahy.FP7P7G	brown	TPS6	trehalose phosphate synthase
arahy.FPLI9C	brown	--	alpha/beta-Hydrolases superfamily protein
arahy.FQ27XI	brown	SKIPA	chromatin protein family
arahy.FR9HZZ	brown	VPS45	vacuolar protein sorting 45
arahy.FSP2M7	brown	CRY1	Deoxyribodipyrimidine photo-lyase (DNA photolyase) (Photoreactivating enzyme) n=1 Tax=Phaeospirillum molischianum DSM 120 RepID=H8FVZ1_PHAMO
arahy.FSY6MA	brown	--	Unknown protein
arahy.FT2N09	brown	psbB	Photosystem II chlorophyll-binding protein CP47 n=2 Tax=Synechococcus RepID=Q3AMD8_SYNSC
arahy.FTL52S	brown	FRL2	FRIGIDA like 2
arahy.FV1RU3	brown	--	uncharacterized protein LOC100780091 isoform X4 [Glycine max]
arahy.FVU3TQ	brown	TUFA	GTP-binding elongation factor Tu family protein
arahy.FW0QWP	brown	CCR1	cinnamoyl coa reductase
arahy.FWV18L	brown	RH47	DEAD-box ATP-dependent RNA helicase
arahy.FWV4H3	brown	Os05g0446300	cell cycle control protein, G10 family protein
arahy.FX1Z4A	brown	LAX2	E3 ubiquitin protein ligase DRIP2-like [Glycine max]
arahy.FX58XH	brown	dnaJ	dnaJ homolog subfamily B member 14-like [Glycine max]
arahy.FX875U	brown	--	Protein of unknown function (DUF506)
arahy.FXBY81	brown	At1g78910	Pseudouridine synthase family protein
arahy.FXLQ18	brown	PDC1	pyruvate decarboxylase-2
arahy.FY9BZZ	brown	LEA5	Late embryogenesis abundant 3 (LEA3) family protein
arahy.FYS41P	brown	HAT22	Homeobox-leucine zipper protein family
arahy.FZZ2BS	brown	At4g21705	Pentatricopeptide repeat (PPR) superfamily protein
arahy.G03TES	brown	REFA1	GTP-binding elongation factor Tu family protein
arahy.G0D851	brown	APE2	DNA-(apurinic or apyrimidinic site) lyase 2-like [Glycine max]
arahy.G0M71R	brown	--	transmembrane protein, putative
arahy.G0QL0C	brown	JAC1	auxilin-related protein 2-like isoform X2 [Glycine max]
arahy.G0YHEE	brown	At1g48100	polygalacturonase 4
arahy.G0YQ1S	brown	PTI6	ethylene-responsive transcription factor 5-like [Glycine max]
arahy.G1PXE9	brown	--	uncharacterized protein LOC100800114 isoform X2 [Glycine max]
arahy.G1RGZB	brown	--	uncharacterized protein LOC100814496 [Glycine max]
arahy.G1TJUN	brown	--	Unknown protein
arahy.G2LGPB	brown	--	RING-H2 finger protein [Glycine max]
arahy.G2XRUR	brown	UBC10	ubiquitin-conjugating enzyme 28
arahy.G33D6N	brown	PYL9	abscisic acid receptor
arahy.G3761Q	brown	RPS1	ribosomal protein S1
arahy.G3H90Z	brown	ACT7	actin 7
arahy.G3JJD2	brown	RGA2	LRR and NB-ARC domain disease resistance protein
arahy.G3VF9V	brown	--	50S ribosomal protein L9, chloroplastic-like isoform X3 [Glycine max]
arahy.G44K46	brown	PRO1	profilin 1
arahy.G4K82F	brown	CDKF-4	Protein kinase superfamily protein
arahy.G50Y2D	brown	--	uncharacterized protein LOC100777386 isoform X2 [Glycine max]
arahy.G5J1BW	brown	--	Unknown protein
arahy.G5LDHE	brown	PAT07	DHHC-type zinc finger family protein
arahy.G5TCW6	brown	KAO1	cytochrome P450, family 88, subfamily A, polypeptide 3
arahy.G5TW2N	brown	PP7	serine/threonine phosphatase 7
arahy.G6AZCI	brown	--	unknown protein; Has 71 Blast hits to 71 proteins in 36 species: Archae - 0; Bacteria - 0; Metazoa - 17; Fungi - 0; Plants - 40; Viruses - 0; Other Eukaryotes - 14 (source: NCBI BLink).
arahy.G6E2F8	brown	CDS1	Phosphatidate cytidylyltransferase family protein
arahy.G6JZIF	brown	RKF1	ATP-binding/protein serine/threonine kinase n=1 Tax=Medicago truncatula RepID=G7L7B9_MEDTR
arahy.G6L3X6	brown	BRAP	BRCA1-associated protein-like [Glycine max]
arahy.G6Y5VA	brown	FRS5	protein FAR1-RELATED SEQUENCE 3-like isoform X2 [Glycine max]
arahy.G720WG	brown	--	Unknown protein
arahy.G7GKNK	brown	RPN8A	26S proteasome non-ATPase regulatory subunit 7 homolog A-like [Glycine max]
arahy.G7WV5I	brown	CYSD1	cysteine synthase D1
arahy.G88L7W	brown	TPS11	trehalose phosphate synthase
arahy.G8BSRK	brown	STR4	alpha/beta hydrolase domain-containing protein 11 [Glycine max]
arahy.G8H5C8	brown	--	Transducin/WD40 repeat-like superfamily protein
arahy.G8Q6Z7	brown	PAM68	protein PAM68, chloroplastic [Glycine max]
arahy.G8USHK	brown	FBL15	F-box/LRR-repeat protein 15-like [Glycine max]
arahy.G8Z8HQ	brown	dph1	DEAD-box ATP-dependent RNA helicase-like protein
arahy.G9J8HU	brown	--	ribosomal protein L28
arahy.G9KXLY	brown	RIPK	ATP binding / kinase/ protein kinase/ protein serine/threonine kinase/ protein-tyrosine kinase n=4 Tax=rosids RepID=C5DB54_VITVI
arahy.G9UJER	brown	--	OB-fold-like isoform 1 n=1 Tax=Theobroma cacao RepID=UPI00042B6F9E
arahy.GA8N54	brown	--	uncharacterized protein At3g61260-like isoform X1 [Glycine max]
arahy.GAUN3U	brown	XEG113	Nucleotide-diphospho-sugar transferase family protein
arahy.GBN5SF	brown	--	RNA recognition motif (RRM)-containing protein
arahy.GBZ8AX	brown	DHS2	3-deoxy-7-phosphoheptulonate synthase (Phospho-2-dehydro-3-deoxyheptonate aldolase) n=163 Tax=Pseudomonas RepID=F2K9C2_PSEBN
arahy.GC3WT6	brown	--	HAD-family hydrolase IIA
arahy.GC5VJY	brown	PRMT6	protein arginine methyltransferase 6
arahy.GCV40F	brown	emc3	ER membrane protein complex subunit-like protein
arahy.GD00VG	brown	HERC2	Regulator of chromosome condensation (RCC1) family protein
arahy.GD0F1M	brown	DEGP7	Pro-apoptotic serine protease n=3 Tax=Cladophialophora RepID=V9DET7_9EURO
arahy.GD33A2	brown	--	Transducin/WD40 repeat-like superfamily protein
arahy.GEC7HX	brown	map3k13-a	Protein kinase superfamily protein
arahy.GEY0M8	brown	--	Pentatricopeptide repeat (PPR) superfamily protein
arahy.GFC6ND	brown	PYL3	abscisic acid receptor
arahy.GFH1HB	brown	--	Unknown protein
arahy.GG16T8	brown	GTG2	GPCR-type G protein 2-like isoform X3 [Glycine max]
arahy.GGDF5U	brown	RAP2-2	ethylene-responsive transcription factor 1B
arahy.GGZ045	brown	--	pre-rRNA-processing protein TSR2-like isoform X2 [Glycine max]
arahy.GH74WI	brown	--	helicase protein MOM1-like isoform X2 [Glycine max]
[truncated: 5,710 more rows]
